# Supplementary material
Source: publisher figshare collection journal article supplement (https://gsajournals.figshare.com/ndownloader/files/25800107)
Supplement: Supplementary file 1 [file 25800107]

## Sheet: Cluster2A
Significant GO terms	TermID	Term	Enrichment	logP	FDR_BH	Genes in Term	Target Genes in Term	Fraction of Targets in Term	Total Target Genes	Total Genes	Entrez Gene IDs	Gene Symbols
FDR_BH p<0.01	GO:0048699	generation of neurons	2.9081e-33	-74.9178	1.7388e-29	848	129	0.240672	536	10917	35900,35184,38788,36876,53437,50320,37007,43234,42496,33840,36445,42358,38168,40225,40143,34073,42187,31883,43656,31045,37201,38863,40515,38961,37552,32743,43469,41363,38067,317817,249072,38218,34927,53563,43803,39537,33607,35037,42986,43758,33392,35259,35378,39873,38185,35197,32723,38469,31017,5740176,36295,43146,36436,37888,41085,36010,35680,32039,31290,34192,3772396,34280,36771,41491,39293,404…	babo,Lim3,Dscam2,unc-104,Sulf1,dpr12,Sema-1b,ro,RhoGAP93B,CG9098,Nrk,Ire1,rho,gogo,wnd,CG14535,CG7156,lz,tll,CG3703,ena,Ank2,nrm,Cbl,Liprin-gamma,RhoGAPp190,Ptp99A,pros,klar,CG32006,Liprin-alpha,drpr,Gli,gukh,Eph,CG32137,slp1,beat-IIIc,ssh,RhoGAP100F,aop,Lar,Dap160,Nrt,CG12004,brat,B-H2,scrt,sdk,CG34340,jeb,boss,Drl-2,betaTub60D,neur,dila,didum,sev,rst,Sema-1a,seq,gcm2,SP2353,svp,Mob2,Hem,robo3,l…
	GO:0030182	neuron differentiation	3.0387e-32	-72.5713	9.0842e-29	751	119	0.222015	536	10917	35900,35184,44786,38788,33262,36876,34385,5740544,41861,53437,50320,41612,37007,33418,43234,45278,42496,33840,36445,42358,38168,40225,40143,35267,36703,42896,34073,42707,42187,37066,39717,33608,31883,31364,31045,53472,43690,33239,32850,37201,38863,40515,38961,37552,32743,43469,36606,41363,38067,33916,317817,249072,32724,38218,38755,34927,53563,43803,39537,33607,37781,44642,35037,33374,43825,41997…	babo,Lim3,nerfin-1,Dscam2,dock,unc-104,Cdk5alpha,futsch,Sra-1,Sulf1,dpr12,sim,Sema-1b,Rab5,ro,csw,RhoGAP93B,CG9098,Nrk,Ire1,rho,gogo,wnd,CdGAPr,unc-5,crb,CG14535,klg,CG7156,Sema-5c,comm,slp2,lz,Fas2,CG3703,Aplip1,chp,Pph13,Rip11,ena,Ank2,nrm,Cbl,Liprin-gamma,RhoGAPp190,Ptp99A,phyl,pros,klar,eya,CG32006,Liprin-alpha,B-H1,drpr,tow,Gli,gukh,Eph,CG32137,slp1,TBPH,Apc,beat-IIIc,Npc2a,sv,CG14883,RhoGAP…
	GO:0048666	neuron development	6.89914e-29	-64.8436	1.375e-25	652	105	0.195896	536	10917	35900,35184,44786,38788,33262,36876,34385,5740544,41861,53437,50320,41612,37007,33418,42496,33840,36445,42358,38168,40225,40143,35267,36703,42896,34073,42187,37066,39717,33608,31883,31364,31045,53472,43690,33239,32850,37201,38863,40515,32743,37552,43469,36606,41363,38067,33916,317817,249072,38218,34927,53563,43803,39537,33607,37781,44642,35037,33374,43825,41997,43758,33392,40715,35259,39441,39873…	babo,Lim3,nerfin-1,Dscam2,dock,unc-104,Cdk5alpha,futsch,Sra-1,Sulf1,dpr12,sim,Sema-1b,Rab5,RhoGAP93B,CG9098,Nrk,Ire1,rho,gogo,wnd,CdGAPr,unc-5,crb,CG14535,CG7156,Sema-5c,comm,slp2,lz,Fas2,CG3703,Aplip1,chp,Pph13,Rip11,ena,Ank2,nrm,RhoGAPp190,Liprin-gamma,Ptp99A,phyl,pros,klar,eya,CG32006,Liprin-alpha,drpr,Gli,gukh,Eph,CG32137,slp1,TBPH,Apc,beat-IIIc,Npc2a,sv,CG14883,RhoGAP100F,aop,kat-60L1,Lar,mi…
	GO:0009653	anatomical structure morphogenesis	2.82757e-25	-56.5252	4.2265e-22	1663	175	0.326493	536	10917	35900,35184,38788,36876,35997,53437,37007,43234,42496,33840,36445,42358,38168,40225,40143,32637,43633,34073,42187,41704,44543,31883,43656,31045,49701,31667,37201,38863,31069,38961,37552,43469,41363,38067,39673,317817,249072,38218,34927,36544,53563,43803,39537,33607,35037,36609,43528,43758,33392,35259,43023,39873,35197,32723,38469,5740176,31017,34648,37185,36295,43146,36436,37888,41085,31940,36010…	babo,Lim3,Dscam2,unc-104,Mmp2,Sulf1,Sema-1b,ro,RhoGAP93B,CG9098,Nrk,Ire1,rho,gogo,wnd,mthl1,tmod,CG14535,CG7156,rdx,enc,lz,tll,CG3703,gish,Dok,ena,Ank2,CG11382,Cbl,Liprin-gamma,Ptp99A,pros,klar,Z600,CG32006,Liprin-alpha,drpr,Gli,AGO1,gukh,Eph,CG32137,slp1,beat-IIIc,Oaz,Cad99C,RhoGAP100F,aop,Lar,dan,Nrt,brat,B-H2,scrt,CG34340,sdk,aret,sano,jeb,boss,Drl-2,betaTub60D,neur,CG15312,dila,didum,sev,step…
	GO:0048731	system development	4.99575e-24	-53.6535	5.6416e-21	2188	206	0.384328	536	10917	35900,35184,38788,36876,35997,53437,50320,37007,43234,42496,33840,36445,42358,38168,40225,40143,32637,43633,34073,42187,41704,31883,43656,43736,36897,31045,49701,31667,37201,31069,38863,40515,38961,37552,32743,43469,38816,41363,38067,249072,317817,38218,36544,34927,53563,43803,39537,34646,33607,35037,42986,36609,43528,43758,34367,33392,117407,35378,35259,43023,31179,39873,38185,35197,32723,38469,…	babo,Lim3,Dscam2,unc-104,Mmp2,Sulf1,dpr12,Sema-1b,ro,RhoGAP93B,CG9098,Nrk,Ire1,rho,gogo,wnd,mthl1,tmod,CG14535,CG7156,rdx,lz,tll,Ef1alpha100E,inaC,CG3703,gish,Dok,ena,CG11382,Ank2,nrm,Cbl,Liprin-gamma,RhoGAPp190,Ptp99A,qm,pros,klar,Liprin-alpha,CG32006,drpr,AGO1,Gli,gukh,Eph,CG32137,crok,slp1,beat-IIIc,ssh,Oaz,Cad99C,RhoGAP100F,Ror,aop,Tsp68C,Dap160,Lar,dan,Unc-76,Nrt,CG12004,brat,B-H2,scrt,aret,…
	GO:0040011	locomotion	5.66138e-24	-53.5284	5.6416e-21	560	89	0.166045	536	10917	35900,35184,32429,44786,33262,36876,34385,40224,41861,53437,31718,41612,37007,33418,42496,45278,38605,36445,42567,41625,40225,35267,36703,41310,37066,39717,33608,31364,49701,43950,37201,41426,43469,38961,38816,41363,38067,33916,317817,249072,34927,53563,39400,33607,44642,35037,38491,43758,33392,35259,46027,35662,39441,2768908,39873,35197,45922,36295,34633,36436,34277,36554,37888,35070,45821,37447…	babo,Lim3,hiw,nerfin-1,dock,unc-104,Cdk5alpha,rdgC,Sra-1,Sulf1,Tbh,sim,Sema-1b,Rab5,RhoGAP93B,csw,shep,Nrk,CASK,Ace,gogo,CdGAPr,unc-5,Tsp86D,Sema-5c,comm,slp2,Fas2,gish,CdsA,ena,HisCl1,Ptp99A,Cbl,qm,pros,klar,eya,CG32006,Liprin-alpha,Gli,gukh,CG32100,slp1,Apc,beat-IIIc,ens,RhoGAP100F,aop,Lar,kermit,so,mirr,CG3857,Nrt,brat,rap,jeb,Ced-12,Drl-2,gcm,RN-tre,betaTub60D,CadN,Abl,Sdc,neur,SoxN,w,Sema-1a…
	GO:0061564	axon development	1.33466e-23	-52.6708	1.14e-20	300	63	0.117537	536	10917	35900,35184,43758,44786,33262,36876,34385,5740544,41861,53437,41612,37007,33418,42496,35259,36445,38168,39873,39441,40225,35267,40143,35197,36703,36295,37066,34277,39717,36436,33608,37888,35070,45821,31364,37447,44275,31290,34192,3772396,37201,38863,46015,44355,43469,32743,37552,45976,41363,36125,249072,317817,33916,39833,42025,53563,37886,38231,43803,40462,33607,44642,35037,33314	babo,Lim3,RhoGAP100F,nerfin-1,dock,unc-104,Cdk5alpha,futsch,Sra-1,Sulf1,sim,Sema-1b,Rab5,RhoGAP93B,Lar,Nrk,rho,Nrt,mirr,gogo,CdGAPr,wnd,brat,unc-5,jeb,Sema-5c,gcm,comm,Drl-2,slp2,betaTub60D,CadN,Abl,Fas2,Sdc,SoxN,rst,Sema-1a,seq,ena,Ank2,tutl,drl,Ptp99A,RhoGAPp190,Liprin-gamma,retn,pros,stan,Liprin-alpha,CG32006,eya,aos,Fas1,gukh,nvy,alpha-Spec,Eph,Hem,slp1,Apc,beat-IIIc,robo3
	GO:0065007	biological regulation	1.72611e-23	-52.4136	1.29e-20	3325	271	0.505597	536	10917	35184,32429,35832,31456,43806,35997,36064,39617,43234,42496,33840,36445,41625,32637,47091,35646,41704,43656,42110,49701,39999,38504,43317,37201,38961,38786,5740362,39673,249072,317817,45816,4379834,34646,33607,33520,43758,39063,40876,33392,41096,35378,35259,42561,37516,35977,35197,38469,5740176,31017,39418,36295,40471,36436,43146,40288,35680,34431,32039,31290,34878,34553,41392,36750,39293,32422,4…	Lim3,hiw,mtt,SK,CG9935,Mmp2,gem,DCX-EMAP,ro,RhoGAP93B,CG9098,Nrk,Ace,mthl1,comt,Gadd45,rdx,tll,Hmx,gish,Eip75B,tipE,Tusp,ena,Cbl,corn,CG34384,Z600,Liprin-alpha,CG32006,onecut,stnB,crok,slp1,cnir,RhoGAP100F,PGRP-LC,Syt4,aop,ird1,Dap160,Lar,GABA-B-R2,GlcT-1,brp,brat,scrt,CG34340,sdk,toe,jeb,CG11426,Drl-2,boss,cmpy,didum,CG5337,sev,rst,GABA-B-R1,Gyc32E,Jupiter,Mlf,Mob2,CG12398,loco,peb,kek2,nerfin-1…
	GO:0007409	axonogenesis	2.01718e-23	-52.2578	1.3401e-20	293	62	0.115672	536	10917	35900,35184,44786,43758,33262,36876,34385,41861,53437,5740544,41612,37007,33418,42496,35259,36445,39441,39873,38168,40143,40225,35267,36703,35197,36295,34277,39717,37066,36436,33608,35070,37888,31364,45821,37447,44275,31290,3772396,34192,37201,38863,44355,37552,43469,46015,45976,41363,36125,317817,249072,33916,42025,39833,37886,53563,38231,43803,40462,33607,44642,35037,33314	babo,Lim3,nerfin-1,RhoGAP100F,dock,unc-104,Cdk5alpha,Sra-1,Sulf1,futsch,sim,Sema-1b,Rab5,RhoGAP93B,Lar,Nrk,mirr,Nrt,rho,wnd,gogo,CdGAPr,unc-5,brat,jeb,gcm,comm,Sema-5c,Drl-2,slp2,CadN,betaTub60D,Fas2,Abl,Sdc,SoxN,rst,seq,Sema-1a,ena,Ank2,drl,Liprin-gamma,Ptp99A,tutl,retn,pros,stan,CG32006,Liprin-alpha,eya,Fas1,aos,nvy,gukh,alpha-Spec,Eph,Hem,slp1,Apc,beat-IIIc,robo3
	GO:0007399	nervous system development	1.07634e-22	-50.5833	6.4354e-20	1524	160	0.298507	536	10917	35900,35184,38788,36876,53437,50320,37007,43234,42496,33840,36445,42358,38168,40225,40143,34073,42187,31883,43656,43736,31045,49701,37201,38863,40515,38961,37552,32743,43469,38816,41363,38067,249072,317817,38218,36544,34927,53563,43803,39537,33607,35037,42986,43758,34367,33392,35378,43023,35259,31179,39873,38185,35197,32723,38469,31017,5740176,36295,36436,43146,37888,42089,41085,36010,35680,32039…	babo,Lim3,Dscam2,unc-104,Sulf1,dpr12,Sema-1b,ro,RhoGAP93B,CG9098,Nrk,Ire1,rho,gogo,wnd,CG14535,CG7156,lz,tll,Ef1alpha100E,CG3703,gish,ena,Ank2,nrm,Cbl,Liprin-gamma,RhoGAPp190,Ptp99A,qm,pros,klar,Liprin-alpha,CG32006,drpr,AGO1,Gli,gukh,Eph,CG32137,slp1,beat-IIIc,ssh,RhoGAP100F,Ror,aop,Dap160,dan,Lar,Unc-76,Nrt,CG12004,brat,B-H2,scrt,sdk,CG34340,jeb,Drl-2,boss,betaTub60D,lute,neur,dila,didum,sev,rs…
	GO:0048468	cell development	1.26882e-22	-50.4188	6.8966e-20	1366	149	0.277985	536	10917	35900,35184,38788,36876,35997,53437,50320,37007,42496,33840,36445,42358,38168,40225,40143,34073,42187,31883,44543,31045,49701,39999,37201,38863,40515,38961,37552,32743,43469,38816,41363,38067,317817,249072,38218,34927,36544,53563,43803,39537,33607,35037,43528,43758,33392,35259,39873,38185,35197,38469,5740176,34648,36295,43146,36436,37888,41085,38418,36010,35680,32039,31290,34192,3772396,34280,449…	babo,Lim3,Dscam2,unc-104,Mmp2,Sulf1,dpr12,Sema-1b,RhoGAP93B,CG9098,Nrk,Ire1,rho,gogo,wnd,CG14535,CG7156,lz,enc,CG3703,gish,Eip75B,ena,Ank2,nrm,Cbl,Liprin-gamma,RhoGAPp190,Ptp99A,qm,pros,klar,CG32006,Liprin-alpha,drpr,Gli,AGO1,gukh,Eph,CG32137,slp1,beat-IIIc,Cad99C,RhoGAP100F,aop,Lar,Nrt,CG12004,brat,scrt,CG34340,aret,jeb,boss,Drl-2,betaTub60D,neur,kst,dila,didum,sev,rst,Sema-1a,seq,gcm2,Eip93F,Kr…
	GO:0050794	regulation of cellular process	2.06719e-22	-49.9307	1.03e-19	2824	240	0.447761	536	10917	40370,41833,35900,35184,32429,43422,36401,35832,43806,36876,35021,35997,36064,53437,31718,39617,43234,42496,33840,36445,42358,38168,40143,32637,47091,35646,41704,44543,31883,43656,42110,36897,49701,39999,37824,31667,43317,37201,38863,32743,38961,37552,38786,41363,5740362,39673,249072,317817,36544,45816,4379834,43803,33607,37864,42733,32161,33520,42986,37633,36632,43528,43758,39063,34367,40876,333…	Aef1,SIDL,babo,Lim3,hiw,eIF4E-6,wuc,mtt,CG9935,unc-104,CG13284,Mmp2,gem,Sulf1,Tbh,DCX-EMAP,ro,RhoGAP93B,CG9098,Nrk,Ire1,rho,wnd,mthl1,comt,Gadd45,rdx,enc,lz,tll,Hmx,inaC,gish,Eip75B,Pask,Dok,Tusp,ena,Ank2,RhoGAPp190,Cbl,Liprin-gamma,corn,pros,CG34384,Z600,Liprin-alpha,CG32006,AGO1,onecut,stnB,Eph,slp1,tamo,CG13830,CG18130,cnir,ssh,PIP5K59B,mspo,Cad99C,RhoGAP100F,PGRP-LC,Ror,Syt4,aop,ird1,Dap160,d…
	GO:0030030	cell projection organization	4.99518e-22	-49.0484	2.1781e-19	643	93	0.173507	536	10917	35900,35184,44786,38788,33262,36876,34385,5740544,41861,53437,41612,37007,33418,42496,33840,36445,42358,38168,40225,40143,35267,36703,42896,34073,42187,37066,39717,33608,31364,31045,53472,34702,37201,38863,32743,37552,43469,41363,249072,317817,33916,33845,38755,34927,53563,43803,39537,33607,37781,44642,35037,43825,43528,41997,43758,32071,33392,35259,39873,35058,39441,40544,35197,38469,5740176,362…	babo,Lim3,nerfin-1,Dscam2,dock,unc-104,Cdk5alpha,futsch,Sra-1,Sulf1,sim,Sema-1b,Rab5,RhoGAP93B,CG9098,Nrk,Ire1,rho,gogo,wnd,CdGAPr,unc-5,crb,CG14535,CG7156,Sema-5c,comm,slp2,Fas2,CG3703,Aplip1,CG5142,ena,Ank2,RhoGAPp190,Liprin-gamma,Ptp99A,pros,Liprin-alpha,CG32006,eya,mtm,tow,Gli,gukh,Eph,CG32137,slp1,TBPH,Apc,beat-IIIc,sv,Cad99C,CG14883,RhoGAP100F,Kap3,aop,Lar,Nrt,qua,mirr,Syt14,brat,scrt,CG343…
	GO:0048749	compound eye development	5.10007e-22	-49.0276	2.1781e-19	320	63	0.117537	536	10917	43825,43758,31292,5740544,41861,33392,43234,38321,45278,35259,43023,35662,36445,42358,36260,39441,32723,45922,42896,42210,31017,37185,42707,36295,39418,43146,41704,31883,43656,35070,45821,41085,32162,31229,35680,49701,43690,32039,33239,31290,3772396,32850,37201,44856,44129,38961,36606,41363,38067,326198,249072,36125,33916,32724,39833,36771,36555,41491,39293,40383,38424,31391,42986	sv,RhoGAP100F,kirre,futsch,Sra-1,aop,ro,dos,csw,Lar,dan,so,Nrk,Ire1,Sobp,mirr,B-H2,rap,crb,gl,sdk,sano,klg,jeb,toe,boss,rdx,lz,tll,CadN,Abl,neur,fw,boi,didum,gish,chp,sev,Pph13,rst,seq,Rip11,ena,ru,hbs,Cbl,phyl,pros,klar,Krn,Liprin-alpha,stan,eya,B-H1,aos,SP2353,mam,svp,Mob2,M6,sty,peb,ssh
	GO:0006928	cellular component movement	8.29732e-22	-48.5409	3.3073e-19	589	88	0.164179	536	10917	35900,35184,44786,39332,33262,36876,34385,35757,5740544,41861,53437,41612,37007,33418,42496,45278,36445,42567,40225,32637,35267,36703,41310,34073,37066,39717,33608,31364,36897,49701,53472,37201,38961,43469,43905,38816,41363,38067,249072,317817,33916,34927,53563,39445,33607,44642,35037,43758,32071,36718,33392,35259,35662,31179,39873,39441,35197,45922,36295,34277,36436,34633,36554,35070,37888,45821…	babo,Lim3,nerfin-1,Klp68D,dock,unc-104,Cdk5alpha,CG14763,futsch,Sra-1,Sulf1,sim,Sema-1b,Rab5,RhoGAP93B,csw,Nrk,CASK,gogo,mthl1,CdGAPr,unc-5,Tsp86D,CG14535,Sema-5c,comm,slp2,Fas2,inaC,gish,Aplip1,ena,Cbl,Ptp99A,syd,qm,pros,klar,Liprin-alpha,CG32006,eya,Gli,gukh,Klc,slp1,Apc,beat-IIIc,RhoGAP100F,Kap3,Khc-73,aop,Lar,so,Unc-76,Nrt,mirr,brat,rap,jeb,gcm,Drl-2,Ced-12,RN-tre,CadN,betaTub60D,Abl,Sdc,SoxN…
	GO:0042330	taxis	1.20655e-21	-48.1665	4.4468e-19	325	63	0.117537	536	10917	35900,35184,43758,44786,33262,36876,34385,40224,41861,53437,41612,37007,42496,38605,35259,36445,39441,39873,2768908,41625,40225,35267,36703,35197,36295,37066,36436,34277,39717,33608,35070,37888,45821,31364,37447,44275,43950,31271,34192,3772396,37201,41426,46015,44355,43469,45976,41363,33916,36125,317817,249072,42025,39833,53563,37886,38231,41491,39400,33607,44642,40383,35037,33314	babo,Lim3,RhoGAP100F,nerfin-1,dock,unc-104,Cdk5alpha,rdgC,Sra-1,Sulf1,sim,Sema-1b,RhoGAP93B,shep,Lar,Nrk,mirr,Nrt,CG3857,Ace,gogo,CdGAPr,unc-5,brat,jeb,Sema-5c,Drl-2,gcm,comm,slp2,CadN,betaTub60D,Abl,Fas2,Sdc,SoxN,CdsA,w,Sema-1a,seq,ena,HisCl1,tutl,drl,Ptp99A,retn,pros,eya,stan,CG32006,Liprin-alpha,Fas1,aos,gukh,nvy,alpha-Spec,svp,CG32100,slp1,Apc,M6,beat-IIIc,robo3
	GO:0001654	eye development	1.26437e-21	-48.1197	4.4468e-19	335	64	0.119403	536	10917	43825,43758,31292,5740544,41861,33392,43234,38321,45278,35259,43023,35662,36445,42358,36260,39441,32723,45922,42896,42210,31017,37185,42707,39418,36295,43146,41704,31883,43656,35070,45821,31364,32162,41085,31229,35680,49701,43690,32039,33239,31290,3772396,32850,37201,44856,44129,38961,36606,41363,38067,326198,249072,36125,33916,32724,39833,36771,36555,41491,39293,40383,38424,31391,42986	sv,RhoGAP100F,kirre,futsch,Sra-1,aop,ro,dos,csw,Lar,dan,so,Nrk,Ire1,Sobp,mirr,B-H2,rap,crb,gl,sdk,sano,klg,toe,jeb,boss,rdx,lz,tll,CadN,Abl,Fas2,fw,neur,boi,didum,gish,chp,sev,Pph13,rst,seq,Rip11,ena,ru,hbs,Cbl,phyl,pros,klar,Krn,Liprin-alpha,stan,eya,B-H1,aos,SP2353,mam,svp,Mob2,M6,sty,peb,ssh
	GO:0031175	neuron projection development	1.73397e-21	-47.8039	5.6355e-19	538	83	0.154851	536	10917	35900,35184,44786,38788,33262,36876,34385,5740544,41861,53437,41612,37007,33418,42496,33840,36445,42358,38168,40225,35267,40143,36703,42896,34073,42187,37066,39717,33608,31364,31045,53472,37201,38863,37552,32743,43469,41363,317817,249072,33916,53563,43803,39537,33607,37781,44642,35037,43825,41997,43758,33392,35259,39441,39873,40544,35197,38469,5740176,36295,36436,34277,37888,35070,45821,37447,357…	babo,Lim3,nerfin-1,Dscam2,dock,unc-104,Cdk5alpha,futsch,Sra-1,Sulf1,sim,Sema-1b,Rab5,RhoGAP93B,CG9098,Nrk,Ire1,rho,gogo,CdGAPr,wnd,unc-5,crb,CG14535,CG7156,Sema-5c,comm,slp2,Fas2,CG3703,Aplip1,ena,Ank2,Liprin-gamma,RhoGAPp190,Ptp99A,pros,CG32006,Liprin-alpha,eya,gukh,Eph,CG32137,slp1,TBPH,Apc,beat-IIIc,sv,CG14883,RhoGAP100F,aop,Lar,mirr,Nrt,Syt14,brat,scrt,CG34340,jeb,Drl-2,gcm,betaTub60D,CadN,Ab…
	GO:0048812	neuron projection morphogenesis	1.79085e-21	-47.7716	5.6355e-19	527	82	0.152985	536	10917	35900,35184,44786,38788,33262,36876,34385,41861,53437,5740544,41612,37007,33418,42496,33840,36445,42358,38168,40225,40143,35267,36703,42896,34073,42187,37066,39717,33608,31364,31045,53472,37201,38863,37552,43469,41363,33916,317817,249072,53563,43803,39537,33607,37781,44642,35037,43825,41997,43758,33392,35259,39873,39441,40544,35197,38469,5740176,36295,36436,34277,35070,37888,45821,35768,37447,442…	babo,Lim3,nerfin-1,Dscam2,dock,unc-104,Cdk5alpha,Sra-1,Sulf1,futsch,sim,Sema-1b,Rab5,RhoGAP93B,CG9098,Nrk,Ire1,rho,gogo,wnd,CdGAPr,unc-5,crb,CG14535,CG7156,Sema-5c,comm,slp2,Fas2,CG3703,Aplip1,ena,Ank2,Liprin-gamma,Ptp99A,pros,eya,CG32006,Liprin-alpha,gukh,Eph,CG32137,slp1,TBPH,Apc,beat-IIIc,sv,CG14883,RhoGAP100F,aop,Lar,Nrt,mirr,Syt14,brat,scrt,CG34340,jeb,Drl-2,gcm,CadN,betaTub60D,Abl,CG14762,S…
	GO:0048858	cell projection morphogenesis	3.87559e-21	-46.9996	1.1586e-18	579	86	0.160448	536	10917	35900,35184,44786,38788,33262,36876,34385,41861,53437,5740544,41612,37007,33418,42496,33840,36445,42358,38168,40225,40143,35267,36703,42896,34073,42187,37066,39717,33608,31364,31045,53472,34702,37201,38863,37552,43469,41363,33916,317817,249072,53563,43803,39537,33607,37781,44642,35037,43825,41997,32071,43758,33392,35259,39873,39441,40544,35197,38469,5740176,36295,36436,34277,35070,37888,45821,357…	babo,Lim3,nerfin-1,Dscam2,dock,unc-104,Cdk5alpha,Sra-1,Sulf1,futsch,sim,Sema-1b,Rab5,RhoGAP93B,CG9098,Nrk,Ire1,rho,gogo,wnd,CdGAPr,unc-5,crb,CG14535,CG7156,Sema-5c,comm,slp2,Fas2,CG3703,Aplip1,CG5142,ena,Ank2,Liprin-gamma,Ptp99A,pros,eya,CG32006,Liprin-alpha,gukh,Eph,CG32137,slp1,TBPH,Apc,beat-IIIc,sv,CG14883,Kap3,RhoGAP100F,aop,Lar,Nrt,mirr,Syt14,brat,scrt,CG34340,jeb,Drl-2,gcm,CadN,betaTub60D,A…
	GO:0048592	eye morphogenesis	5.11948e-21	-46.7212	1.4576e-18	258	55	0.102612	536	10917	43825,43758,31292,41861,33392,38321,45278,43234,35259,35662,36445,42358,39441,32723,45922,42896,42210,31017,37185,42707,36295,43146,41704,31883,43656,35070,31364,32162,31229,35680,49701,43690,32039,33239,31290,32850,3772396,44856,44129,38961,36606,41363,38067,326198,33916,249072,36125,32724,39833,36771,41491,39293,40383,38424,31391	sv,RhoGAP100F,kirre,Sra-1,aop,dos,csw,ro,Lar,so,Nrk,Ire1,mirr,B-H2,rap,crb,gl,sdk,sano,klg,jeb,boss,rdx,lz,tll,CadN,Fas2,fw,boi,didum,gish,chp,sev,Pph13,rst,Rip11,seq,ru,hbs,Cbl,phyl,pros,klar,Krn,eya,Liprin-alpha,stan,B-H1,aos,SP2353,svp,Mob2,M6,sty,peb
	GO:0032990	cell part morphogenesis	6.92589e-21	-46.419	1.8615e-18	584	86	0.160448	536	10917	35900,35184,44786,38788,33262,36876,34385,41861,53437,5740544,41612,37007,33418,42496,33840,36445,42358,38168,40225,40143,35267,36703,42896,34073,42187,37066,39717,33608,31364,31045,53472,34702,37201,38863,37552,43469,41363,33916,317817,249072,53563,43803,39537,33607,37781,44642,35037,43825,41997,32071,43758,33392,35259,39873,39441,40544,35197,38469,5740176,36295,36436,34277,35070,37888,45821,357…	babo,Lim3,nerfin-1,Dscam2,dock,unc-104,Cdk5alpha,Sra-1,Sulf1,futsch,sim,Sema-1b,Rab5,RhoGAP93B,CG9098,Nrk,Ire1,rho,gogo,wnd,CdGAPr,unc-5,crb,CG14535,CG7156,Sema-5c,comm,slp2,Fas2,CG3703,Aplip1,CG5142,ena,Ank2,Liprin-gamma,Ptp99A,pros,eya,CG32006,Liprin-alpha,gukh,Eph,CG32137,slp1,TBPH,Apc,beat-IIIc,sv,CG14883,Kap3,RhoGAP100F,aop,Lar,Nrt,mirr,Syt14,brat,scrt,CG34340,jeb,Drl-2,gcm,CadN,betaTub60D,A…
	GO:0050789	regulation of biological process	7.16079e-21	-46.3857	1.8615e-18	3053	249	0.464552	536	10917	40370,41833,35900,35184,32429,43422,36401,35832,43806,36876,35021,35997,36064,53437,31718,39617,43234,42496,33840,36445,42358,38168,40143,32637,47091,35646,41704,44543,31883,43656,42110,36897,49701,39999,38504,37824,31667,43317,37201,38863,32743,38961,37552,38786,41363,5740362,39673,249072,317817,38218,36544,45816,4379834,43803,33607,37864,42733,32161,33520,42986,37633,36632,43528,43758,39063,343…	Aef1,SIDL,babo,Lim3,hiw,eIF4E-6,wuc,mtt,CG9935,unc-104,CG13284,Mmp2,gem,Sulf1,Tbh,DCX-EMAP,ro,RhoGAP93B,CG9098,Nrk,Ire1,rho,wnd,mthl1,comt,Gadd45,rdx,enc,lz,tll,Hmx,inaC,gish,Eip75B,tipE,Pask,Dok,Tusp,ena,Ank2,RhoGAPp190,Cbl,Liprin-gamma,corn,pros,CG34384,Z600,Liprin-alpha,CG32006,drpr,AGO1,onecut,stnB,Eph,slp1,tamo,CG13830,CG18130,cnir,ssh,PIP5K59B,mspo,Cad99C,RhoGAP100F,PGRP-LC,Ror,Syt4,aop,ird…
	GO:0007411	axon guidance	1.36642e-20	-45.7395	3.4041e-18	245	53	0.0988806	536	10917	35900,35184,44786,43758,33262,36876,34385,41861,53437,41612,37007,42496,35259,36445,39441,39873,35267,40225,36703,35197,36295,34277,39717,37066,36436,33608,35070,37888,45821,31364,37447,44275,34192,3772396,37201,44355,46015,43469,45976,41363,36125,33916,317817,249072,42025,39833,37886,38231,53563,33607,44642,35037,33314	babo,Lim3,nerfin-1,RhoGAP100F,dock,unc-104,Cdk5alpha,Sra-1,Sulf1,sim,Sema-1b,RhoGAP93B,Lar,Nrk,mirr,Nrt,CdGAPr,gogo,unc-5,brat,jeb,gcm,comm,Sema-5c,Drl-2,slp2,CadN,betaTub60D,Abl,Fas2,Sdc,SoxN,Sema-1a,seq,ena,drl,tutl,Ptp99A,retn,pros,stan,eya,CG32006,Liprin-alpha,Fas1,aos,nvy,alpha-Spec,gukh,slp1,Apc,beat-IIIc,robo3
	GO:0001745	compound eye morphogenesis	1.6646e-20	-45.5421	3.9811e-18	246	53	0.0988806	536	10917	43825,43758,31292,41861,33392,38321,45278,43234,35259,35662,36445,42358,39441,32723,45922,42896,42210,31017,37185,42707,36295,43146,41704,31883,35070,32162,31229,35680,49701,43690,32039,33239,31290,32850,3772396,44856,44129,38961,36606,41363,38067,326198,33916,249072,36125,32724,39833,36771,41491,39293,40383,38424,31391	sv,RhoGAP100F,kirre,Sra-1,aop,dos,csw,ro,Lar,so,Nrk,Ire1,mirr,B-H2,rap,crb,gl,sdk,sano,klg,jeb,boss,rdx,lz,CadN,fw,boi,didum,gish,chp,sev,Pph13,rst,Rip11,seq,ru,hbs,Cbl,phyl,pros,klar,Krn,eya,Liprin-alpha,stan,B-H1,aos,SP2353,svp,Mob2,M6,sty,peb
	GO:0044700	single organism signaling	1.9199e-20	-45.3994	4.2515e-18	1363	144	0.268657	536	10917	35900,32429,35832,43806,36876,35997,31718,39617,32619,33840,36445,42358,38168,41625,40143,32637,47091,35646,41704,31883,43656,36897,49701,39999,37824,31667,43317,38863,38961,37552,32743,32290,5740362,249072,4379834,43803,42733,33520,37633,43528,43758,39063,34367,40876,33392,117407,35378,42561,32005,35977,35197,32723,31744,40471,36436,43146,41085,42960,32039,31290,34878,34192,44936,326198,34553,36…	babo,hiw,mtt,CG9935,unc-104,Mmp2,Tbh,DCX-EMAP,para,CG9098,Nrk,Ire1,rho,Ace,wnd,mthl1,comt,Gadd45,rdx,lz,tll,inaC,gish,Eip75B,Pask,Dok,Tusp,Ank2,Cbl,Liprin-gamma,RhoGAPp190,Syt12,CG34384,Liprin-alpha,stnB,Eph,CG13830,cnir,PIP5K59B,Cad99C,RhoGAP100F,PGRP-LC,Ror,Syt4,aop,Tsp68C,Dap160,GABA-B-R2,CG32676,brp,brat,B-H2,Gbeta5,CG11426,Drl-2,boss,neur,RabX4,sev,rst,GABA-B-R1,Sema-1a,Eip93F,Krn,Gyc32E,mam…
	GO:0023052	signaling	1.9199e-20	-45.3994	4.2515e-18	1363	144	0.268657	536	10917	35900,32429,35832,43806,36876,35997,31718,39617,32619,33840,36445,42358,38168,41625,40143,32637,47091,35646,41704,31883,43656,36897,49701,39999,37824,31667,43317,38863,32743,38961,37552,32290,5740362,249072,4379834,43803,42733,33520,37633,43528,43758,39063,34367,40876,33392,117407,35378,42561,32005,35977,32723,35197,31744,40471,36436,43146,41085,42960,32039,31290,34878,34192,326198,44936,34553,36…	babo,hiw,mtt,CG9935,unc-104,Mmp2,Tbh,DCX-EMAP,para,CG9098,Nrk,Ire1,rho,Ace,wnd,mthl1,comt,Gadd45,rdx,lz,tll,inaC,gish,Eip75B,Pask,Dok,Tusp,Ank2,RhoGAPp190,Cbl,Liprin-gamma,Syt12,CG34384,Liprin-alpha,stnB,Eph,CG13830,cnir,PIP5K59B,Cad99C,RhoGAP100F,PGRP-LC,Ror,Syt4,aop,Tsp68C,Dap160,GABA-B-R2,CG32676,brp,B-H2,brat,Gbeta5,CG11426,Drl-2,boss,neur,RabX4,sev,rst,GABA-B-R1,Sema-1a,Krn,Eip93F,Gyc32E,mam…
	GO:0007154	cell communication	4.11769e-20	-44.6364	8.7927e-18	1418	147	0.274254	536	10917	35900,32429,35832,43806,36876,35997,31718,39617,32619,33840,36445,42358,38168,41625,40143,32637,47091,35646,41704,31883,43656,36897,49701,39999,37824,31667,43317,38863,38961,37552,32743,32290,5740362,249072,4379834,43803,42733,33520,37633,43528,43758,39063,34367,40876,33392,117407,41096,35378,35259,42561,32005,35977,35197,32723,31744,40471,36436,43146,41085,42960,32039,31290,34878,34192,44936,326…	babo,hiw,mtt,CG9935,unc-104,Mmp2,Tbh,DCX-EMAP,para,CG9098,Nrk,Ire1,rho,Ace,wnd,mthl1,comt,Gadd45,rdx,lz,tll,inaC,gish,Eip75B,Pask,Dok,Tusp,Ank2,Cbl,Liprin-gamma,RhoGAPp190,Syt12,CG34384,Liprin-alpha,stnB,Eph,CG13830,cnir,PIP5K59B,Cad99C,RhoGAP100F,PGRP-LC,Ror,Syt4,aop,Tsp68C,ird1,Dap160,Lar,GABA-B-R2,CG32676,brp,brat,B-H2,Gbeta5,CG11426,Drl-2,boss,neur,RabX4,sev,rst,GABA-B-R1,Sema-1a,Eip93F,Krn,G…
	GO:0044707	single-multicellular organism process	4.55478e-20	-44.5355	9.3907e-18	3272	259	0.483209	536	10917	35184,32429,35832,39332,35997,37007,39617,43234,42496,33840,36445,32637,34073,41704,43656,43736,49701,39999,37201,31069,40515,38961,43469,249072,39673,317817,53563,36403,39537,34646,33607,36609,43758,33392,117407,35378,35259,31179,35977,35330,35197,38469,31017,5740176,39418,36295,41381,36436,43146,37888,42089,31940,35680,31271,32039,31290,31071,39293,32422,33314,31391,42672,44786,31292,32158,5740…	Lim3,hiw,mtt,Klp68D,Mmp2,Sema-1b,DCX-EMAP,ro,RhoGAP93B,CG9098,Nrk,mthl1,CG14535,rdx,tll,Ef1alpha100E,gish,Eip75B,ena,CG11382,nrm,Cbl,Ptp99A,Liprin-alpha,Z600,CG32006,gukh,CG42663,CG32137,crok,slp1,Oaz,RhoGAP100F,aop,Tsp68C,Dap160,Lar,Unc-76,brp,Cen,brat,scrt,sdk,CG34340,toe,jeb,dpr5,Drl-2,boss,betaTub60D,lute,CG15312,didum,w,sev,rst,CG3638,Mob2,CG12398,robo3,peb,loco,nerfin-1,kirre,cac,futsch,dpr…
	GO:0097485	neuron projection guidance	6.42811e-20	-44.191	1.2811e-17	253	53	0.0988806	536	10917	35900,35184,44786,43758,33262,36876,34385,41861,53437,41612,37007,42496,35259,36445,39441,39873,40225,35267,36703,35197,36295,34277,37066,39717,36436,33608,35070,37888,31364,45821,37447,44275,34192,3772396,37201,44355,43469,46015,45976,41363,36125,249072,317817,33916,42025,39833,37886,53563,38231,33607,44642,35037,33314	babo,Lim3,nerfin-1,RhoGAP100F,dock,unc-104,Cdk5alpha,Sra-1,Sulf1,sim,Sema-1b,RhoGAP93B,Lar,Nrk,mirr,Nrt,gogo,CdGAPr,unc-5,brat,jeb,gcm,Sema-5c,comm,Drl-2,slp2,CadN,betaTub60D,Fas2,Abl,Sdc,SoxN,Sema-1a,seq,ena,drl,Ptp99A,tutl,retn,pros,stan,Liprin-alpha,CG32006,eya,Fas1,aos,nvy,gukh,alpha-Spec,slp1,Apc,beat-IIIc,robo3
	GO:0048667	cell morphogenesis involved in neuron differentiation	7.93351e-20	-43.9806	1.5301e-17	435	71	0.132463	536	10917	35900,35184,44786,33262,36876,34385,41861,53437,5740544,41612,37007,33418,42496,36445,42358,38168,40225,40143,35267,36703,42896,37066,39717,33608,31364,37201,38863,37552,43469,41363,33916,317817,249072,53563,43803,33607,44642,35037,43825,43758,33392,35259,39441,39873,35197,38469,5740176,36295,36436,34277,35070,37888,45821,37447,44275,31290,3772396,34192,43826,44355,46015,34280,45976,36125,42025,3…	babo,Lim3,nerfin-1,dock,unc-104,Cdk5alpha,Sra-1,Sulf1,futsch,sim,Sema-1b,Rab5,RhoGAP93B,Nrk,Ire1,rho,gogo,wnd,CdGAPr,unc-5,crb,Sema-5c,comm,slp2,Fas2,ena,Ank2,Liprin-gamma,Ptp99A,pros,eya,CG32006,Liprin-alpha,gukh,Eph,slp1,Apc,beat-IIIc,sv,RhoGAP100F,aop,Lar,mirr,Nrt,brat,scrt,CG34340,jeb,Drl-2,gcm,CadN,betaTub60D,Abl,Sdc,SoxN,rst,seq,Sema-1a,Actbeta,drl,tutl,gcm2,retn,stan,Fas1,aos,nvy,alpha-Spe…
	GO:0007423	sensory organ development	1.76071e-19	-43.1834	3.2898e-17	452	72	0.134328	536	10917	31292,5740544,41861,31248,43234,45278,36445,42358,36260,42896,42707,41704,31883,43656,31364,49701,43690,33239,43087,32850,37201,38961,36606,35077,41363,38067,33916,249072,32724,42986,43825,43758,39619,33392,38321,43023,35259,35662,39441,32723,45922,37185,31017,42210,36295,39418,44849,43146,35070,45821,41085,32162,31229,35680,32039,31290,3772396,44856,44129,32846,326198,36125,39833,36771,37886,365…	kirre,futsch,Sra-1,sgg,ro,csw,Nrk,Ire1,Sobp,crb,klg,rdx,lz,tll,Fas2,gish,chp,Pph13,msi,Rip11,ena,Cbl,phyl,rdo,pros,klar,eya,Liprin-alpha,B-H1,ssh,sv,RhoGAP100F,Tom,aop,dos,dan,Lar,so,mirr,B-H2,rap,sano,sdk,gl,jeb,toe,pnr,boss,CadN,Abl,neur,fw,boi,didum,sev,rst,seq,ru,hbs,Bx,Krn,stan,aos,SP2353,nvy,mam,svp,Hem,Mob2,M6,sty,peb
	GO:0022008	neurogenesis	2.34413e-19	-42.8972	4.2471e-17	1370	142	0.264925	536	10917	35900,35184,38788,36876,53437,50320,37007,43234,42496,33840,36445,42358,38168,40225,40143,34073,42187,31883,43656,43736,31045,49701,37201,38863,40515,38961,37552,32743,43469,38816,41363,38067,317817,249072,38218,34927,53563,43803,39537,33607,35037,42986,43758,33392,35259,35378,39873,31179,38185,35197,32723,38469,5740176,31017,36295,43146,36436,42089,37888,41085,36010,35680,32039,31290,34192,37723…	babo,Lim3,Dscam2,unc-104,Sulf1,dpr12,Sema-1b,ro,RhoGAP93B,CG9098,Nrk,Ire1,rho,gogo,wnd,CG14535,CG7156,lz,tll,Ef1alpha100E,CG3703,gish,ena,Ank2,nrm,Cbl,Liprin-gamma,RhoGAPp190,Ptp99A,qm,pros,klar,CG32006,Liprin-alpha,drpr,Gli,gukh,Eph,CG32137,slp1,beat-IIIc,ssh,RhoGAP100F,aop,Lar,Dap160,Nrt,Unc-76,CG12004,brat,B-H2,scrt,CG34340,sdk,jeb,boss,Drl-2,lute,betaTub60D,neur,dila,didum,sev,rst,Sema-1a,seq…
	GO:0048513	organ development	3.28028e-19	-42.5612	5.7685e-17	1244	133	0.248134	536	10917	35900,35997,43234,36445,42358,38168,32637,43633,41704,31883,43656,36897,49701,31667,37201,31069,38961,32743,38816,41363,38067,249072,38218,34927,43803,33607,42986,43528,43758,33392,117407,43023,35259,35197,32723,34648,37185,31017,5740176,39418,36295,36436,43146,37888,41085,31940,35680,32039,35425,31290,3772396,34192,34280,31071,44936,326198,41217,39583,36771,36555,41491,39293,40462,33314,31391,42…	babo,Mmp2,ro,Nrk,Ire1,rho,mthl1,tmod,rdx,lz,tll,inaC,gish,Dok,ena,CG11382,Cbl,RhoGAPp190,qm,pros,klar,Liprin-alpha,drpr,Gli,Eph,slp1,ssh,Cad99C,RhoGAP100F,aop,Tsp68C,dan,Lar,brat,B-H2,aret,sano,sdk,CG34340,toe,jeb,Drl-2,boss,betaTub60D,neur,CG15312,didum,sev,step,rst,seq,Sema-1a,gcm2,CG3638,Eip93F,Krn,Glut4EF,bbg,SP2353,mam,svp,Mob2,Hem,robo3,peb,loco,Akap200,kirre,Sra-1,l(3)neo38,futsch,sgg,sim,…
	GO:0000902	cell morphogenesis	4.15853e-19	-42.324	7.104e-17	670	90	0.16791	536	10917	35900,35184,44786,38788,33262,36876,34385,41861,53437,5740544,31248,41612,37007,33418,42496,33840,36445,42358,38168,40225,40143,35267,36703,42896,34073,42187,37066,39717,33608,31364,31045,53472,34702,31667,37201,38863,37552,43469,41363,33916,317817,249072,53563,43803,39537,33607,37781,44642,35037,43825,41997,32071,43758,33392,35259,39873,39441,40544,35197,38469,5740176,36295,36436,34277,35070,378…	babo,Lim3,nerfin-1,Dscam2,dock,unc-104,Cdk5alpha,Sra-1,Sulf1,futsch,sgg,sim,Sema-1b,Rab5,RhoGAP93B,CG9098,Nrk,Ire1,rho,gogo,wnd,CdGAPr,unc-5,crb,CG14535,CG7156,Sema-5c,comm,slp2,Fas2,CG3703,Aplip1,CG5142,Dok,ena,Ank2,Liprin-gamma,Ptp99A,pros,eya,CG32006,Liprin-alpha,gukh,Eph,CG32137,slp1,TBPH,Apc,beat-IIIc,sv,CG14883,Kap3,RhoGAP100F,aop,Lar,Nrt,mirr,Syt14,brat,scrt,CG34340,jeb,Drl-2,gcm,CadN,beta…
	GO:0006935	chemotaxis	6.91408e-19	-41.8156	1.1483e-16	266	53	0.0988806	536	10917	35900,35184,43758,44786,33262,36876,34385,41861,53437,41612,37007,42496,35259,36445,39441,39873,40225,35267,36703,35197,36295,37066,36436,34277,39717,33608,35070,37888,45821,31364,37447,44275,34192,3772396,37201,46015,44355,43469,45976,41363,33916,36125,317817,249072,39833,42025,37886,38231,53563,33607,44642,35037,33314	babo,Lim3,RhoGAP100F,nerfin-1,dock,unc-104,Cdk5alpha,Sra-1,Sulf1,sim,Sema-1b,RhoGAP93B,Lar,Nrk,mirr,Nrt,gogo,CdGAPr,unc-5,brat,jeb,Sema-5c,Drl-2,gcm,comm,slp2,CadN,betaTub60D,Abl,Fas2,Sdc,SoxN,Sema-1a,seq,ena,tutl,drl,Ptp99A,retn,pros,eya,stan,CG32006,Liprin-alpha,aos,Fas1,nvy,alpha-Spec,gukh,slp1,Apc,beat-IIIc,robo3
	GO:0009887	organ morphogenesis	7.26931e-19	-41.7655	1.1747e-16	713	93	0.173507	536	10917	35900,31292,35997,41861,41423,31248,33418,45278,43234,36445,42358,35698,38168,32637,36703,43633,42896,42707,37066,34681,41704,31883,43656,31364,49701,43950,43690,33239,32850,31667,37201,31069,38961,32754,36964,36606,41363,38067,33916,249072,32724,38755,34927,33607,43825,43758,39619,33392,38321,35259,35662,35058,39441,32723,40205,45922,31017,34648,37185,42210,36295,44849,43146,35070,41085,32162,31…	babo,kirre,Mmp2,Sra-1,l(3)neo38,sgg,Rab5,csw,ro,Nrk,Ire1,CG43340,rho,mthl1,unc-5,tmod,crb,klg,Sema-5c,spict,rdx,lz,tll,Fas2,gish,CdsA,chp,Pph13,Rip11,Dok,ena,CG11382,Cbl,CG42684,CG14478,phyl,pros,klar,eya,Liprin-alpha,B-H1,tow,Gli,slp1,sv,RhoGAP100F,Tom,aop,dos,Lar,so,qua,mirr,B-H2,CG42674,rap,sdk,aret,sano,gl,jeb,pnr,boss,CadN,neur,fw,CG15312,boi,didum,Gbeta13F,sev,step,rst,Sema-1a,seq,ru,Fhos,h…
	GO:0007275	multicellular organismal development	1.38413e-18	-41.1215	2.1778e-16	2741	225	0.419776	536	10917	35900,35184,38788,36876,35997,53437,50320,37007,43234,42496,33840,36445,42358,38168,40225,40143,32637,43633,34073,42187,41704,44543,31883,43656,43736,36897,31045,49701,31667,37201,31069,38863,40515,38961,37552,32743,43469,38816,41363,38067,249072,39673,317817,38218,36544,34927,53563,43803,36403,39537,34646,33607,37864,35037,42986,36609,43528,43758,34367,33392,117407,35378,35259,43023,31179,39873,…	babo,Lim3,Dscam2,unc-104,Mmp2,Sulf1,dpr12,Sema-1b,ro,RhoGAP93B,CG9098,Nrk,Ire1,rho,gogo,wnd,mthl1,tmod,CG14535,CG7156,rdx,enc,lz,tll,Ef1alpha100E,inaC,CG3703,gish,Dok,ena,CG11382,Ank2,nrm,Cbl,Liprin-gamma,RhoGAPp190,Ptp99A,qm,pros,klar,Liprin-alpha,Z600,CG32006,drpr,AGO1,Gli,gukh,Eph,CG42663,CG32137,crok,slp1,tamo,beat-IIIc,ssh,Oaz,Cad99C,RhoGAP100F,Ror,aop,Tsp68C,Dap160,Lar,dan,Unc-76,Nrt,CG1200…
	GO:0000904	cell morphogenesis involved in differentiation	1.89011e-18	-40.8099	2.8977e-16	471	72	0.134328	536	10917	35900,35184,44786,33262,36876,34385,41861,53437,5740544,31248,41612,37007,33418,42496,36445,42358,38168,40225,40143,35267,36703,42896,37066,39717,33608,31364,37201,38863,37552,43469,41363,33916,317817,249072,53563,43803,33607,44642,35037,43825,43758,33392,35259,39441,39873,35197,38469,5740176,36295,36436,34277,35070,37888,45821,37447,44275,31290,3772396,34192,43826,44355,46015,34280,45976,36125,4…	babo,Lim3,nerfin-1,dock,unc-104,Cdk5alpha,Sra-1,Sulf1,futsch,sgg,sim,Sema-1b,Rab5,RhoGAP93B,Nrk,Ire1,rho,gogo,wnd,CdGAPr,unc-5,crb,Sema-5c,comm,slp2,Fas2,ena,Ank2,Liprin-gamma,Ptp99A,pros,eya,CG32006,Liprin-alpha,gukh,Eph,slp1,Apc,beat-IIIc,sv,RhoGAP100F,aop,Lar,mirr,Nrt,brat,scrt,CG34340,jeb,Drl-2,gcm,CadN,betaTub60D,Abl,Sdc,SoxN,rst,seq,Sema-1a,Actbeta,drl,tutl,gcm2,retn,stan,Fas1,aos,nvy,alpha…
	GO:0050896	response to stimulus	2.15732e-18	-40.6777	3.2247e-16	2441	207	0.386194	536	10917	35900,35184,32429,35832,36876,35997,53437,31718,39617,37007,42496,32619,33840,38605,36445,42358,38168,41625,40143,32637,40225,41190,35646,32033,31883,43656,36897,41616,49701,39999,38504,37824,31667,43317,37201,38863,41426,32743,43469,38961,34300,41363,35620,5740362,249072,317817,33845,38218,36544,246456,53563,43803,33607,35037,42733,33520,43528,43758,39063,34367,33392,41096,35259,39873,2768908,42…	babo,Lim3,hiw,mtt,unc-104,Mmp2,Sulf1,Tbh,DCX-EMAP,Sema-1b,RhoGAP93B,para,CG9098,shep,Nrk,Ire1,rho,Ace,wnd,mthl1,gogo,Rpt3R,Gadd45,CG42339,lz,tll,inaC,2mit,gish,Eip75B,tipE,Pask,Dok,Tusp,ena,Ank2,HisCl1,RhoGAPp190,Ptp99A,Cbl,IP3K1,pros,Tsp42Ej,CG34384,Liprin-alpha,CG32006,mtm,drpr,AGO1,CG30098,gukh,Eph,slp1,beat-IIIc,CG13830,cnir,Cad99C,RhoGAP100F,PGRP-LC,Ror,aop,ird1,Lar,Nrt,CG3857,GABA-B-R2,CG12…
	GO:0044767	single-organism developmental process	1.26685e-17	-38.9074	1.8474e-15	3199	248	0.462687	536	10917	35900,35184,38788,36876,35997,53437,50320,37007,43234,42496,33840,36445,42358,38168,40225,40143,32637,43633,34073,42187,41704,44543,31883,43656,43736,36897,31045,49701,39999,31667,37201,31069,38863,40515,38961,37552,32743,43469,38816,41363,38067,249072,39673,317817,38218,36544,34927,53563,43803,36403,39537,34646,33607,37864,35037,42986,36609,43528,43758,34367,33392,117407,35378,35259,43023,39873,…	babo,Lim3,Dscam2,unc-104,Mmp2,Sulf1,dpr12,Sema-1b,ro,RhoGAP93B,CG9098,Nrk,Ire1,rho,gogo,wnd,mthl1,tmod,CG14535,CG7156,rdx,enc,lz,tll,Ef1alpha100E,inaC,CG3703,gish,Eip75B,Dok,ena,CG11382,Ank2,nrm,Cbl,Liprin-gamma,RhoGAPp190,Ptp99A,qm,pros,klar,Liprin-alpha,Z600,CG32006,drpr,AGO1,Gli,gukh,Eph,CG42663,CG32137,crok,slp1,tamo,beat-IIIc,ssh,Oaz,Cad99C,RhoGAP100F,Ror,aop,Tsp68C,Dap160,Lar,dan,Nrt,Unc-76…
	GO:0051960	regulation of nervous system development	2.68429e-17	-38.1565	3.8213e-15	221	46	0.0858209	536	10917	43825,32429,32158,36876,5740544,31248,33392,43234,45278,40715,35378,35259,42567,35197,53579,31017,34277,39717,34681,33608,35070,45821,31364,48973,37447,41085,32039,31075,34192,3772396,38863,46015,32743,37552,41363,249072,36125,317817,39833,38231,39293,37781,33607,38424,37633,42986	sv,hiw,cac,unc-104,futsch,sgg,aop,ro,csw,kat-60L1,Dap160,Lar,CASK,brat,Dip3,sdk,gcm,comm,spict,slp2,CadN,Abl,Fas2,Src64B,Sdc,neur,sev,DAAM,Sema-1a,seq,Ank2,tutl,RhoGAPp190,Liprin-gamma,pros,Liprin-alpha,stan,CG32006,aos,alpha-Spec,Mob2,TBPH,slp1,sty,PIP5K59B,ssh
	GO:0032502	developmental process	3.5281e-17	-37.8832	4.9057e-15	3223	248	0.462687	536	10917	35900,35184,38788,36876,35997,53437,50320,37007,43234,42496,33840,36445,42358,38168,40225,40143,32637,43633,34073,42187,41704,44543,31883,43656,43736,36897,31045,49701,39999,31667,37201,31069,38863,40515,38961,37552,32743,43469,38816,41363,38067,249072,39673,317817,38218,36544,34927,53563,43803,36403,39537,34646,33607,37864,35037,42986,36609,43528,43758,34367,33392,117407,35378,35259,43023,39873,…	babo,Lim3,Dscam2,unc-104,Mmp2,Sulf1,dpr12,Sema-1b,ro,RhoGAP93B,CG9098,Nrk,Ire1,rho,gogo,wnd,mthl1,tmod,CG14535,CG7156,rdx,enc,lz,tll,Ef1alpha100E,inaC,CG3703,gish,Eip75B,Dok,ena,CG11382,Ank2,nrm,Cbl,Liprin-gamma,RhoGAPp190,Ptp99A,qm,pros,klar,Liprin-alpha,Z600,CG32006,drpr,AGO1,Gli,gukh,Eph,CG42663,CG32137,crok,slp1,tamo,beat-IIIc,ssh,Oaz,Cad99C,RhoGAP100F,Ror,aop,Tsp68C,Dap160,Lar,dan,Nrt,Unc-76…
	GO:0048856	anatomical structure development	6.59214e-17	-37.2581	8.9578e-15	2914	230	0.429104	536	10917	35900,35184,38788,36876,35997,53437,50320,37007,43234,42496,33840,36445,42358,38168,40225,40143,32637,43633,34073,42187,41704,44543,31883,43656,43736,36897,31045,49701,39999,31667,37201,31069,38863,40515,38961,37552,32743,43469,38816,41363,38067,249072,39673,317817,38218,36544,34927,53563,43803,39537,34646,33607,35037,42986,36609,43528,43758,34367,33392,117407,35378,35259,43023,31179,39873,38185,…	babo,Lim3,Dscam2,unc-104,Mmp2,Sulf1,dpr12,Sema-1b,ro,RhoGAP93B,CG9098,Nrk,Ire1,rho,gogo,wnd,mthl1,tmod,CG14535,CG7156,rdx,enc,lz,tll,Ef1alpha100E,inaC,CG3703,gish,Eip75B,Dok,ena,CG11382,Ank2,nrm,Cbl,Liprin-gamma,RhoGAPp190,Ptp99A,qm,pros,klar,Liprin-alpha,Z600,CG32006,drpr,AGO1,Gli,gukh,Eph,CG32137,crok,slp1,beat-IIIc,ssh,Oaz,Cad99C,RhoGAP100F,Ror,aop,Tsp68C,Dap160,Lar,dan,Unc-76,Nrt,CG12004,Cen,…
	GO:0030154	cell differentiation	8.46019e-17	-37.0086	1.1241e-14	2163	186	0.347015	536	10917	35900,35184,38788,36876,35997,53437,50320,37007,43234,42496,33840,36445,42358,38168,40225,40143,34073,42187,41704,44543,31883,43656,43736,31045,49701,39999,37201,38863,40515,38961,37552,32743,43469,38816,41363,38067,249072,317817,38218,36544,34927,53563,43803,39537,33607,35037,42986,43528,43758,33392,117407,35378,35259,31179,39873,38185,32005,35197,32723,38469,34648,31017,5740176,36295,36436,4314…	babo,Lim3,Dscam2,unc-104,Mmp2,Sulf1,dpr12,Sema-1b,ro,RhoGAP93B,CG9098,Nrk,Ire1,rho,gogo,wnd,CG14535,CG7156,rdx,enc,lz,tll,Ef1alpha100E,CG3703,gish,Eip75B,ena,Ank2,nrm,Cbl,Liprin-gamma,RhoGAPp190,Ptp99A,qm,pros,klar,Liprin-alpha,CG32006,drpr,AGO1,Gli,gukh,Eph,CG32137,slp1,beat-IIIc,ssh,Cad99C,RhoGAP100F,aop,Tsp68C,Dap160,Lar,Unc-76,Nrt,CG12004,CG32676,brat,B-H2,scrt,aret,sdk,CG34340,jeb,Drl-2,boss…
	GO:0048869	cellular developmental process	1.45272e-16	-36.4679	1.8882e-14	2224	189	0.352612	536	10917	35900,35184,38788,36876,35997,53437,50320,37007,43234,42496,33840,36445,42358,38168,40225,40143,34073,42187,41704,44543,31883,43656,43736,31045,49701,39999,31667,37201,38863,40515,38961,37552,32743,43469,38816,41363,38067,249072,317817,38218,36544,34927,53563,43803,39537,33607,35037,42986,43528,43758,33392,117407,35378,35259,31179,39873,38185,32005,35197,32723,38469,34648,31017,5740176,36295,3643…	babo,Lim3,Dscam2,unc-104,Mmp2,Sulf1,dpr12,Sema-1b,ro,RhoGAP93B,CG9098,Nrk,Ire1,rho,gogo,wnd,CG14535,CG7156,rdx,enc,lz,tll,Ef1alpha100E,CG3703,gish,Eip75B,Dok,ena,Ank2,nrm,Cbl,Liprin-gamma,RhoGAPp190,Ptp99A,qm,pros,klar,Liprin-alpha,CG32006,drpr,AGO1,Gli,gukh,Eph,CG32137,slp1,beat-IIIc,ssh,Cad99C,RhoGAP100F,aop,Tsp68C,Dap160,Lar,Unc-76,Nrt,CG12004,CG32676,brat,B-H2,scrt,aret,sdk,CG34340,jeb,Drl-2,…
	GO:0001751	compound eye photoreceptor cell differentiation	1.91158e-16	-36.1934	2.4318e-14	144	36	0.0671642	536	10917	4.37583e+182	RhoGAP100F,aop,dos,csw,ro,Lar,Nrk,Ire1,B-H2,crb,gl,klg,jeb,boss,lz,CadN,boi,didum,sev,chp,Pph13,seq,Rip11,ru,hbs,Cbl,phyl,pros,klar,Liprin-alpha,stan,eya,B-H1,SP2353,svp,Mob2
	GO:0032989	cellular component morphogenesis	3.39602e-16	-35.6188	4.2302e-14	782	93	0.173507	536	10917	35900,35184,44786,38788,33262,36876,34385,41861,53437,5740544,31248,41612,37007,33418,42496,33840,36445,42358,38168,40225,40143,35267,36703,42896,34073,42187,37066,39717,33608,31364,31045,53472,34702,31667,37201,38863,37552,43469,41363,33916,317817,249072,53563,43803,39445,39537,33607,37781,44642,35037,43825,41997,43528,32071,43758,33392,35259,39873,39441,40544,35197,38469,5740176,36295,36436,342…	babo,Lim3,nerfin-1,Dscam2,dock,unc-104,Cdk5alpha,Sra-1,Sulf1,futsch,sgg,sim,Sema-1b,Rab5,RhoGAP93B,CG9098,Nrk,Ire1,rho,gogo,wnd,CdGAPr,unc-5,crb,CG14535,CG7156,Sema-5c,comm,slp2,Fas2,CG3703,Aplip1,CG5142,Dok,ena,Ank2,Liprin-gamma,Ptp99A,pros,eya,CG32006,Liprin-alpha,gukh,Eph,Klc,CG32137,slp1,TBPH,Apc,beat-IIIc,sv,CG14883,Cad99C,Kap3,RhoGAP100F,aop,Lar,Nrt,mirr,Syt14,brat,scrt,CG34340,jeb,Drl-2,gc…
	GO:0032501	multicellular organismal process	3.80868e-16	-35.5041	4.6474e-14	3708	271	0.505597	536	10917	35184,32429,35832,39332,35997,39617,37007,43234,42496,32619,33840,36445,32637,34073,41704,43656,43736,49701,39999,38504,37201,31069,40515,43469,38961,39673,249072,317817,53563,36403,39537,34646,33607,40126,36609,43758,33392,117407,35378,35259,31179,35977,35330,35197,38469,5740176,31017,39418,36295,36436,41381,43146,37888,42089,31940,35680,31271,32039,31290,31071,39293,32422,33314,42672,31391,4478…	Lim3,hiw,mtt,Klp68D,Mmp2,DCX-EMAP,Sema-1b,ro,RhoGAP93B,para,CG9098,Nrk,mthl1,CG14535,rdx,tll,Ef1alpha100E,gish,Eip75B,tipE,ena,CG11382,nrm,Ptp99A,Cbl,Z600,Liprin-alpha,CG32006,gukh,CG42663,CG32137,crok,slp1,Rcd7,Oaz,RhoGAP100F,aop,Tsp68C,Dap160,Lar,Unc-76,brp,Cen,brat,scrt,CG34340,sdk,toe,jeb,Drl-2,dpr5,boss,betaTub60D,lute,CG15312,didum,w,sev,rst,CG3638,Mob2,CG12398,robo3,loco,peb,nerfin-1,kirre…
	GO:0001754	eye photoreceptor cell differentiation	3.8937e-16	-35.482	4.6561e-14	147	36	0.0671642	536	10917	4.37583e+182	RhoGAP100F,aop,dos,csw,ro,Lar,Nrk,Ire1,B-H2,crb,gl,klg,jeb,boss,lz,CadN,boi,didum,sev,chp,Pph13,seq,Rip11,ru,hbs,Cbl,phyl,pros,klar,Liprin-alpha,stan,eya,B-H1,SP2353,svp,Mob2
	GO:0046530	photoreceptor cell differentiation	5.20203e-16	-35.1923	6.0986e-14	165	38	0.0708955	536	10917	4.37583e+192	RhoGAP100F,aop,ro,dos,csw,Lar,Nrk,Ire1,B-H2,crb,gl,klg,jeb,boss,lz,CadN,boi,didum,chp,sev,Pph13,seq,Rip11,ru,hbs,sdt,Cbl,phyl,pros,klar,stan,Liprin-alpha,eya,B-H1,SP2353,svp,Mob2,peb
	GO:0050793	regulation of developmental process	5.08508e-15	-32.9125	5.8469e-13	581	75	0.139925	536	10917	32429,34170,31292,32158,36876,45840,5740544,41861,31248,43234,45278,42567,53579,42896,39717,34681,31883,44543,33608,31364,49701,39999,43087,31667,37201,38863,32743,37552,41363,33916,317817,249072,36544,37781,33607,44642,42986,37633,36632,43825,33392,40715,35378,35259,40205,35197,31017,34648,34069,34277,35070,45821,37447,41085,48973,35680,31075,32039,31290,3772396,34192,39004,44129,46015,40303,342…	hiw,Akap200,kirre,cac,unc-104,cpo,futsch,Sra-1,sgg,ro,csw,CASK,Dip3,crb,comm,spict,lz,enc,slp2,Fas2,gish,Eip75B,msi,Dok,ena,Ank2,RhoGAPp190,Liprin-gamma,pros,eya,CG32006,Liprin-alpha,AGO1,TBPH,slp1,Apc,ssh,PIP5K59B,mspo,sv,aop,kat-60L1,Dap160,Lar,CG42674,brat,sdk,aret,CG7115,gcm,CadN,Abl,Sdc,neur,Src64B,didum,DAAM,sev,rst,seq,Sema-1a,Fhos,hbs,tutl,CG3618,gcm2,stan,aos,alpha-Spec,mam,Atpalpha,Hem,…
	GO:2000026	regulation of multicellular organismal development	2.48398e-14	-31.3263	2.8022e-12	404	59	0.110075	536	10917	43825,32429,34170,31292,32158,36876,5740544,31248,33392,43234,45278,40715,35378,35259,42567,35197,53579,42896,31017,34277,39717,34681,44543,31883,33608,35070,45821,31364,48973,41085,37447,35680,49701,32039,39999,31075,31290,31667,34192,3772396,38863,44129,46015,32743,37552,41363,36125,317817,249072,39833,38231,39293,36750,37781,33607,44642,38424,37633,42986	sv,hiw,Akap200,kirre,cac,unc-104,futsch,sgg,aop,ro,csw,kat-60L1,Dap160,Lar,CASK,brat,Dip3,crb,sdk,gcm,comm,spict,enc,lz,slp2,CadN,Abl,Fas2,Src64B,neur,Sdc,didum,gish,sev,Eip75B,DAAM,rst,Dok,Sema-1a,seq,Ank2,hbs,tutl,RhoGAPp190,Liprin-gamma,pros,stan,CG32006,Liprin-alpha,aos,alpha-Spec,Mob2,Mlf,TBPH,slp1,Apc,sty,PIP5K59B,ssh
	GO:0042221	response to chemical	3.56968e-14	-30.9637	3.9524e-12	842	93	0.173507	536	10917	35900,35184,44786,34170,35832,33262,36876,34385,45840,5740544,2768670,41861,53437,31718,31248,41612,37007,42496,45278,32619,36445,326116,42358,38168,41625,40225,35267,36703,42707,37066,39717,33608,43656,31364,36897,49701,39999,45338,43087,37201,43469,42310,41363,33916,317817,249072,36544,53563,33607,44642,39089,35037,39071,43758,46194,35259,39441,42561,39873,35197,36295,2768858,36436,43146,44849,…	babo,Lim3,nerfin-1,Akap200,mtt,dock,unc-104,Cdk5alpha,cpo,futsch,dpr9,Sra-1,Sulf1,Tbh,sgg,sim,Sema-1b,RhoGAP93B,csw,para,Nrk,tau,Ire1,rho,Ace,gogo,CdGAPr,unc-5,klg,Sema-5c,comm,slp2,tll,Fas2,inaC,gish,Eip75B,na,msi,ena,Ptp99A,unc79,pros,eya,CG32006,Liprin-alpha,AGO1,gukh,slp1,Apc,MTF-1,beat-IIIc,Hsp67Bc,RhoGAP100F,Spn,Lar,mirr,GABA-B-R2,Nrt,brat,jeb,dpr,Drl-2,boss,pnr,gcm,Syn,betaTub60D,CadN,Abl,…
	GO:0009605	response to external stimulus	7.02135e-14	-30.2872	7.6328e-12	769	87	0.162313	536	10917	35900,35184,44786,32158,33262,36876,34385,40224,41861,53437,31248,41612,37007,42496,32619,38605,36445,41625,40225,35267,36703,37066,39717,33608,31364,36897,31245,49701,43950,39999,37201,41426,43469,41363,33916,317817,249072,38218,246456,53563,34840,37099,39400,33607,44642,35037,33374,43758,39063,38321,41096,35259,35662,39441,2768908,39873,38185,35197,42210,36295,40471,34277,36436,37888,35070,4582…	babo,Lim3,nerfin-1,cac,dock,unc-104,Cdk5alpha,rdgC,Sra-1,Sulf1,sgg,sim,Sema-1b,RhoGAP93B,para,shep,Nrk,Ace,gogo,CdGAPr,unc-5,Sema-5c,comm,slp2,Fas2,inaC,Seipin,gish,CdsA,Eip75B,ena,HisCl1,Ptp99A,pros,eya,CG32006,Liprin-alpha,drpr,CG30098,gukh,Rab14,IM23,CG32100,slp1,Apc,beat-IIIc,Npc2a,RhoGAP100F,PGRP-LC,dos,ird1,Lar,so,mirr,CG3857,Nrt,CG12004,brat,gl,jeb,CG11426,gcm,Drl-2,betaTub60D,CadN,Abl,Sdc…
	GO:0042051	compound eye photoreceptor development	3.8819e-13	-28.5773	4.1446e-11	81	24	0.0447761	536	10917	3.56804e+122	didum,RhoGAP100F,chp,sev,Pph13,Rip11,seq,aop,Lar,Nrk,phyl,Ire1,klar,eya,Liprin-alpha,stan,SP2353,crb,gl,jeb,boss,Mob2,lz,CadN
	GO:0050808	synapse organization	4.57854e-13	-28.4122	4.8026e-11	112	28	0.0522388	536	10917	4.37583e+142	RhoGAP100F,hiw,lbm,unc-104,Sema-1a,futsch,Ank2,sgg,Dap160,Lar,sff,pros,repo,brp,Liprin-alpha,CG34127,Appl,Gli,AGO1,Prosap,alpha-Spec,jeb,Atpalpha,comm,Hem,cmpy,TBPH,Fas2
	GO:0042462	eye photoreceptor cell development	5.24051e-13	-28.2772	5.4022e-11	82	24	0.0447761	536	10917	3.56804e+122	didum,RhoGAP100F,chp,sev,Pph13,Rip11,seq,aop,Lar,Nrk,phyl,Ire1,klar,eya,Liprin-alpha,stan,SP2353,crb,gl,jeb,boss,Mob2,lz,CadN
	GO:0042461	photoreceptor cell development	5.45882e-13	-28.2364	5.5319e-11	97	26	0.0485075	536	10917	3.56804e+132	didum,RhoGAP100F,chp,sev,Pph13,Rip11,seq,aop,sdt,Lar,Nrk,phyl,Ire1,klar,Liprin-alpha,stan,eya,SP2353,crb,gl,jeb,boss,Mob2,lz,CadN,peb
	GO:0007165	signal transduction	1.37919e-12	-27.3095	1.3744e-10	938	96	0.179104	536	10917	35900,32429,35832,32158,32157,33262,34385,32551,40224,31718,31248,41612,39617,33418,45278,33840,36445,42358,38168,32637,35267,32674,36703,35646,31883,43656,36897,49701,53472,43950,39999,37824,41398,31667,43317,38863,35041,38961,32743,32754,36606,5740362,38057,34840,43803,318046,37099,3885573,42733,33520,41203,33374,43528,43758,39063,34367,39619,32874,33392,32760,38321,46027,42561,39441,31744,4047…	babo,hiw,mtt,cac,CG10362,dock,Cdk5alpha,CycD,rdgC,Tbh,sgg,sim,DCX-EMAP,Rab5,csw,CG9098,Nrk,Ire1,rho,mthl1,CdGAPr,RSG7,unc-5,Gadd45,lz,tll,inaC,gish,Aplip1,CdsA,Eip75B,Pask,Csk,Dok,Tusp,Ank2,Lrch,Cbl,RhoGAPp190,CG42684,phyl,CG34384,mthl10,Rab14,Eph,mthl14,IM23,Octbeta3R,CG13830,cnir,CG8500,Npc2a,Cad99C,RhoGAP100F,PGRP-LC,Ror,Tom,CG42450,aop,Socs16D,dos,kermit,GABA-B-R2,mirr,Gbeta5,CG11426,pnr,boss…
	GO:0045595	regulation of cell differentiation	4.82849e-12	-26.0565	4.7327e-10	291	45	0.0839552	536	10917	36632,43825,31292,36876,31248,33392,43234,45278,40715,35378,35259,35197,53579,34648,31017,34277,39717,31883,44543,33608,35070,41085,35680,49701,32039,31075,43087,34192,3772396,39004,46015,32743,34280,41363,249072,36125,317817,33916,36544,39833,36555,33607,44642,38424,42986	mspo,sv,kirre,unc-104,sgg,aop,ro,csw,kat-60L1,Dap160,Lar,brat,Dip3,aret,sdk,gcm,comm,lz,enc,slp2,CadN,neur,didum,gish,sev,DAAM,msi,Sema-1a,seq,Fhos,tutl,RhoGAPp190,gcm2,pros,Liprin-alpha,stan,CG32006,eya,AGO1,aos,mam,slp1,Apc,sty,ssh
	GO:0045664	regulation of neuron differentiation	5.10076e-12	-26.0016	4.9189e-10	106	26	0.0485075	536	10917	4.38253e+133	sv,DAAM,sev,unc-104,Sema-1a,seq,aop,tutl,ro,RhoGAPp190,csw,kat-60L1,Lar,pros,CG32006,Liprin-alpha,stan,Dip3,sdk,comm,slp2,CadN,slp1,sty,neur,ssh
	GO:0050767	regulation of neurogenesis	5.96683e-12	-25.8448	5.6628e-10	141	30	0.0559701	536	10917	4.38253e+153	sv,DAAM,sev,unc-104,Sema-1a,seq,aop,tutl,ro,RhoGAPp190,csw,kat-60L1,Lar,Dap160,pros,CG32006,Liprin-alpha,stan,brat,aos,Dip3,sdk,gcm,comm,slp2,CadN,slp1,sty,neur,ssh
	GO:0007155	cell adhesion	6.11727e-12	-25.8199	5.7149e-10	198	36	0.0671642	536	10917	4.35284e+181	Cad99C,Dscam2,kirre,alpha-catenin-related,glec,beat-VII,Lar,Dscam4,CASK,rho,CG42674,klg,CG7115,CadN,Fas2,Src64B,fw,boi,Cad96Cb,Dscam3,Gbeta13F,chp,rst,beat-IIIa,hbs,nrm,CG3618,stan,drpr,Gli,Fas1,alpha-Spec,beat-IIIb,Apc,beat-IIIc,plx
	GO:0060284	regulation of cell development	8.30561e-12	-25.5141	7.6399e-10	200	36	0.0671642	536	10917	4.38254e+183	sv,unc-104,aop,ro,csw,kat-60L1,Dap160,Lar,brat,Dip3,sdk,gcm,comm,lz,enc,slp2,CadN,neur,didum,gish,DAAM,sev,Sema-1a,seq,Fhos,tutl,RhoGAPp190,pros,Liprin-alpha,stan,CG32006,aos,slp1,Apc,sty,ssh
	GO:0022610	biological adhesion	9.49723e-12	-25.38	8.6036e-10	211	37	0.0690299	536	10917	4.35284e+186	Cad99C,Dscam2,kirre,alpha-catenin-related,glec,beat-VII,Lar,Dscam4,CASK,rho,CG42674,klg,CG7115,CadN,Fas2,Src64B,fw,Eig71Ee,boi,Cad96Cb,Dscam3,Gbeta13F,chp,rst,beat-IIIa,hbs,nrm,CG3618,stan,drpr,Gli,Fas1,alpha-Spec,beat-IIIb,Apc,beat-IIIc,plx
	GO:0022603	regulation of anatomical structure morphogenesis	1.10715e-11	-25.2266	9.8801e-10	254	41	0.0764925	536	10917	3.66324e+207	mspo,sv,Akap200,kirre,unc-104,Sra-1,aop,ro,csw,kat-60L1,Lar,CASK,CG42674,Dip3,CG7115,lz,CadN,Abl,Fas2,neur,gish,sev,DAAM,Dok,Sema-1a,seq,ena,Fhos,tutl,RhoGAPp190,CG3618,pros,Liprin-alpha,stan,alpha-Spec,Atpalpha,Hem,Mlf,Apc,sty,ssh
	GO:0008038	neuron recognition	1.2687e-11	-25.0904	1.1155e-09	110	26	0.0485075	536	10917	3.33743e+130	Npc2a,Sema-1a,Sulf1,dpr12,nrm,tutl,drl,RhoGAPp190,RhoGAP93B,Ptp99A,Nrt,CG12004,CG32006,stan,Gli,Fas1,alpha-Spec,comm,Drl-2,slp2,CadN,Abl,slp1,Fas2,beat-IIIc,robo3
	GO:0051128	regulation of cellular component organization	1.40288e-11	-24.9899	1.2156e-09	557	66	0.123134	536	10917	32429,31292,32158,36876,5740544,41861,32551,31248,33418,42567,40143,47091,39717,34681,44543,31364,49701,53472,31667,37201,38863,32743,37552,41363,39673,249072,4379834,37781,44642,37633,42986,36632,43528,40876,40715,35259,42561,40205,35197,36978,45922,34648,34069,33022,35070,40288,45821,37447,48973,35680,31075,42443,35425,3772396,34192,39004,40303,46015,36125,38231,41392,37978,48971,39293,40462,37…	hiw,kirre,cac,unc-104,futsch,Sra-1,CycD,sgg,Rab5,CASK,wnd,comt,comm,spict,enc,Fas2,gish,Aplip1,Dok,ena,Ank2,RhoGAPp190,Liprin-gamma,pros,Z600,Liprin-alpha,stnB,TBPH,Apc,PIP5K59B,ssh,mspo,Cad99C,Syt4,kat-60L1,Lar,GABA-B-R2,CG42674,brat,Patronin,rap,aret,CG7115,obst-A,CadN,cmpy,Abl,Sdc,Src64B,didum,DAAM,CG15923,step,seq,Sema-1a,Fhos,CG3618,tutl,stan,alpha-Spec,Jupiter,Atf-2,Atpalpha,Mob2,Hem,NC2alp…
	GO:0044763	single-organism cellular process	1.43023e-11	-24.9706	1.2216e-09	4900	316	0.589552	536	10917	5740876,35184,32429,35832,43806,39332,35997,39617,37007,43234,42496,32619,33840,36445,41625,32637,47091,34073,35646,41704,43656,43736,49701,39999,43317,37201,40515,43469,38961,5740362,249072,317817,42213,53563,4379834,32230,39537,34646,33607,40126,33520,36669,43758,39063,40876,33392,117407,41096,35378,35259,31179,42561,35977,35330,35197,38469,5740176,31017,36295,40471,36436,43146,40288,42089,3788…	CG34452,Lim3,hiw,mtt,CG9935,Klp68D,Mmp2,DCX-EMAP,Sema-1b,ro,RhoGAP93B,para,CG9098,Nrk,Ace,mthl1,comt,CG14535,Gadd45,rdx,tll,Ef1alpha100E,gish,Eip75B,Tusp,ena,nrm,Ptp99A,Cbl,CG34384,Liprin-alpha,CG32006,cona,gukh,stnB,CG3812,CG32137,crok,slp1,Rcd7,cnir,CG10253,RhoGAP100F,PGRP-LC,Syt4,aop,Tsp68C,ird1,Dap160,Lar,Unc-76,GABA-B-R2,brp,Cen,brat,scrt,CG34340,sdk,jeb,CG11426,Drl-2,boss,cmpy,lute,betaTub6…
	GO:0008037	cell recognition	1.96726e-11	-24.6518	1.6567e-09	112	26	0.0485075	536	10917	3.33743e+130	Npc2a,Sema-1a,Sulf1,dpr12,nrm,tutl,drl,RhoGAPp190,RhoGAP93B,Ptp99A,Nrt,CG12004,CG32006,stan,Gli,Fas1,alpha-Spec,comm,Drl-2,slp2,CadN,Abl,slp1,Fas2,beat-IIIc,robo3
	GO:0007268	synaptic transmission	2.8029e-11	-24.2978	2.3276e-09	306	45	0.0839552	536	10917	32429,43806,32158,36876,45840,40876,36718,5740544,41861,31718,31248,33418,35378,32619,42567,39485,40544,41625,35977,40143,47091,35197,34681,41938,41247,45821,31364,48973,37447,53472,38863,37552,32290,36125,249072,38231,4379834,41701,41491,48971,39293,49968,37781,44317,37633	hiw,CG9935,cac,unc-104,cpo,Syt4,Khc-73,futsch,Sra-1,Tbh,sgg,Rab5,Dap160,para,CASK,Syx13,Syt14,Ace,brp,wnd,comt,brat,spict,Sap47,Syn,Abl,Fas2,Src64B,Sdc,Aplip1,Ank2,Liprin-gamma,Syt12,stan,Liprin-alpha,alpha-Spec,stnB,Ipp,svp,Atpalpha,Mob2,Caps,TBPH,CanB,PIP5K59B
	GO:0098609	cell-cell adhesion	3.06879e-11	-24.2072	2.5135e-09	60	19	0.0354478	536	10917	4.21034e+94	Dscam3,Cad96Cb,Cad99C,chp,Dscam2,kirre,rst,beat-IIIa,glec,hbs,beat-VII,stan,Fas1,beat-IIIb,klg,CadN,Fas2,beat-IIIc,fw
	GO:0065008	regulation of biological quality	3.83068e-11	-23.9854	3.0951e-09	934	92	0.171642	536	10917	32429,31456,43806,32158,36876,5740544,40224,41861,31718,31248,33418,36445,42567,38168,41625,40143,47091,42896,32420,41704,34681,41938,31364,31245,39706,53472,41398,31667,37201,38863,32743,37552,32683,32290,38067,249072,43442,34927,4379834,34840,34646,37781,39089,32161,42986,37633,33374,43528,36718,40876,35378,35259,39485,40544,35977,40205,35197,37185,34719,34069,43146,41247,35070,45821,32423,3216…	hiw,SK,CG9935,cac,unc-104,futsch,rdgC,Sra-1,Tbh,sgg,Rab5,Nrk,CASK,rho,Ace,wnd,comt,crb,CG9509,rdx,spict,Sap47,Fas2,Seipin,Eig71Ee,Aplip1,Csk,Dok,ena,Ank2,RhoGAPp190,Liprin-gamma,wus,Syt12,klar,Liprin-alpha,Vha100-1,Gli,stnB,Rab14,crok,TBPH,MTF-1,CG18130,ssh,PIP5K59B,Npc2a,Cad99C,Khc-73,Syt4,Dap160,Lar,Syx13,Syt14,brp,CG42674,brat,sano,CG9426,CG7115,boss,Syn,CadN,Abl,Eo,fw,Sdc,Src64B,kst,DAAM,seq,…
	GO:0007156	homophilic cell adhesion	1.38211e-10	-22.7022	1.1018e-08	33	14	0.0261194	536	10917	3.61254e+69	stan,Dscam3,Cad96Cb,Cad99C,Fas1,chp,Dscam2,kirre,rst,klg,hbs,CadN,Fas2,fw
	GO:0007267	cell-cell signaling	1.45984e-10	-22.6475	1.1485e-08	534	62	0.115672	536	10917	32429,43806,32158,36876,45840,40876,35997,36718,5740544,41861,31718,31248,117407,33418,35378,32619,326116,42567,39485,40544,41625,32005,35977,40143,47091,35197,31068,32723,41704,34681,41938,41247,45821,31364,48973,37447,41085,38963,53472,31290,33739,38863,44861,46015,44355,37552,40105,36606,32290,249072,36125,39833,38231,4379834,41701,41491,48971,39293,49968,37781,37633,44317	hiw,CG9935,cac,unc-104,cpo,Syt4,Mmp2,Khc-73,futsch,Sra-1,Tbh,sgg,Tsp68C,Rab5,Dap160,para,tau,CASK,Syx13,Syt14,Ace,CG32676,brp,wnd,comt,brat,CG14624,B-H2,rdx,spict,Sap47,Syn,Abl,Fas2,Src64B,Sdc,neur,Unr,Aplip1,rst,qtc,Ank2,sdt,tutl,drl,Liprin-gamma,CG32206,phyl,Syt12,Liprin-alpha,stan,aos,alpha-Spec,stnB,Ipp,svp,Atpalpha,Mob2,Caps,TBPH,PIP5K59B,CanB
	GO:0045466	R7 cell differentiation	1.57182e-10	-22.5736	1.2205e-08	45	16	0.0298507	536	10917	2.49072e+82	Liprin-alpha,RhoGAP100F,sev,svp,klg,seq,boss,aop,lz,CadN,dos,csw,Cbl,Lar,phyl,pros
	GO:0051239	regulation of multicellular organismal process	1.89247e-10	-22.388	1.4506e-08	564	64	0.119403	536	10917	35900,32429,34170,31292,32158,36876,45840,5740544,31248,43234,45278,42567,53579,42896,35646,39717,34681,44543,31883,33608,31364,49701,39999,31667,38863,32743,37552,41363,317817,249072,37781,33607,44642,37633,42986,43825,33392,40715,35259,35378,35197,31017,34277,35070,45821,37447,41085,48973,35680,31075,32039,31290,35425,3772396,34192,44129,46015,34280,36125,39833,38231,39293,36750,38424	babo,hiw,Akap200,kirre,cac,unc-104,cpo,futsch,sgg,ro,csw,CASK,Dip3,crb,Gadd45,comm,spict,enc,lz,slp2,Fas2,gish,Eip75B,Dok,Ank2,RhoGAPp190,Liprin-gamma,pros,CG32006,Liprin-alpha,TBPH,slp1,Apc,PIP5K59B,ssh,sv,aop,kat-60L1,Lar,Dap160,brat,sdk,gcm,CadN,Abl,Sdc,neur,Src64B,didum,DAAM,sev,rst,step,seq,Sema-1a,hbs,tutl,gcm2,stan,aos,alpha-Spec,Mob2,Mlf,sty
	GO:0048523	negative regulation of cellular process	3.036e-10	-21.9153	2.2978e-08	896	87	0.162313	536	10917	40370,34582,32429,43422,34170,36401,33262,36876,35021,35997,5740544,53437,31248,33418,43234,45278,32674,53579,42896,41704,34681,31883,33608,41025,31364,38963,49701,43087,41398,38863,38961,37552,32754,41363,39673,33916,317817,32724,38755,36544,31000,37781,33607,44642,34370,39619,32874,33392,35378,39441,42561,37516,35197,32723,44819,36978,38469,37188,34648,31017,36295,39418,44849,34277,33022,35070,…	Aef1,kek2,hiw,eIF4E-6,Akap200,wuc,dock,unc-104,CG13284,Mmp2,futsch,Sulf1,sgg,Rab5,ro,csw,RSG7,Dip3,crb,rdx,spict,lz,slp2,p,Fas2,Unr,gish,msi,Csk,Ank2,Cbl,Liprin-gamma,CG42684,pros,Z600,eya,CG32006,B-H1,tow,AGO1,elav,TBPH,slp1,Apc,Rsf1,Tom,CG42450,aop,Dap160,mirr,GABA-B-R2,GlcT-1,brat,B-H2,g,Patronin,scrt,Topors,aret,sdk,jeb,toe,pnr,gcm,obst-A,CadN,grim,cmpy,Abl,neur,Src64B,CG15923,GABA-B-R1,seq,S…
	GO:0044699	single-organism process	6.42686e-10	-21.1654	4.8033e-08	6380	380	0.708955	536	10917	5740876,35184,32429,35832,31456,43806,39332,35997,39617,37007,43234,42496,32619,33840,36445,41625,32637,47091,34073,35646,41704,43656,43736,49701,39999,38504,43317,37201,31069,41426,40515,43469,38961,5740362,39673,249072,317817,42213,53563,4379834,32230,36403,39537,34646,33607,40126,33520,36609,36669,43758,39063,40876,33392,117407,41096,35378,35259,31179,42561,35977,35330,35197,33760,38469,574017…	CG34452,Lim3,hiw,mtt,SK,CG9935,Klp68D,Mmp2,DCX-EMAP,Sema-1b,ro,RhoGAP93B,para,CG9098,Nrk,Ace,mthl1,comt,CG14535,Gadd45,rdx,tll,Ef1alpha100E,gish,Eip75B,tipE,Tusp,ena,CG11382,HisCl1,nrm,Ptp99A,Cbl,CG34384,Z600,Liprin-alpha,CG32006,cona,gukh,stnB,CG3812,CG42663,CG32137,crok,slp1,Rcd7,cnir,Oaz,CG10253,RhoGAP100F,PGRP-LC,Syt4,aop,Tsp68C,ird1,Dap160,Lar,Unc-76,GABA-B-R2,brp,Cen,brat,CG14024,scrt,CG343…
	GO:0051093	negative regulation of developmental process	8.76163e-10	-20.8555	6.4674e-08	181	31	0.0578358	536	10917	3.24294e+157	hiw,unc-104,msi,seq,sgg,aop,ro,Liprin-gamma,gcm2,pros,eya,CG32006,brat,AGO1,Dip3,aos,mam,aret,sdk,spict,Mob2,gcm,slp2,CadN,TBPH,slp1,Abl,Apc,sty,Src64B,neur
	GO:0050807	regulation of synapse organization	1.1407e-09	-20.5916	8.3174e-08	97	22	0.0410448	536	10917	5.34723e+111	Aplip1,hiw,cac,unc-104,futsch,Sra-1,sgg,Ank2,Liprin-gamma,CASK,stan,wnd,brat,alpha-Spec,spict,Mob2,Abl,TBPH,Fas2,Src64B,Sdc,PIP5K59B
	GO:0050803	regulation of synapse structure and activity	1.18377e-09	-20.5546	8.5274e-08	124	25	0.0466418	536	10917	5.34723e+126	Aplip1,hiw,CG9935,cac,unc-104,Khc-73,futsch,Sra-1,Ank2,sgg,Rab5,Liprin-gamma,CASK,stan,wnd,brat,alpha-Spec,Mob2,spict,Abl,TBPH,Fas2,Src64B,Sdc,PIP5K59B
	GO:0048663	neuron fate commitment	1.31347e-09	-20.4506	9.3491e-08	73	19	0.0354478	536	10917	4.47863e+95	nerfin-1,sev,ru,aop,Cbl,ro,csw,dos,phyl,Ire1,pros,CG32006,stan,svp,gl,klg,boss,slp2,slp1
	GO:0048519	negative regulation of biological process	3.41791e-09	-19.4942	2.4042e-07	1032	93	0.173507	536	10917	40370,34582,32429,43422,34170,36401,33262,36876,35021,35997,5740544,53437,31248,33418,43234,45278,38168,32674,53579,42896,41704,34681,31883,33608,41025,31364,38963,49701,43087,41398,38863,38961,37552,32754,41363,39673,33916,317817,32724,38755,36544,38620,31000,37781,33607,33509,44642,37864,34370,39619,32874,33392,35378,39441,42561,37516,35197,32723,44819,36978,38469,37188,34648,31017,34719,36295,…	Aef1,kek2,hiw,eIF4E-6,Akap200,wuc,dock,unc-104,CG13284,Mmp2,futsch,Sulf1,sgg,Rab5,ro,csw,rho,RSG7,Dip3,crb,rdx,spict,lz,slp2,p,Fas2,Unr,gish,msi,Csk,Ank2,Cbl,Liprin-gamma,CG42684,pros,Z600,eya,CG32006,B-H1,tow,AGO1,blanks,elav,TBPH,slp1,CG17265,Apc,tamo,Rsf1,Tom,CG42450,aop,Dap160,mirr,GABA-B-R2,GlcT-1,brat,B-H2,g,Patronin,scrt,Topors,aret,sdk,CG9426,jeb,toe,pnr,gcm,obst-A,cmpy,CadN,grim,Abl,neur…
	GO:0016043	cellular component organization	4.25891e-09	-19.2743	2.9609e-07	2284	168	0.313433	536	10917	35900,35184,32429,36401,38788,39332,36876,35021,35997,53437,37007,42496,33840,36445,42358,38168,40143,40225,47091,43633,34073,42187,44543,31045,31667,37201,38863,32743,43469,37552,41363,38067,249072,317817,42213,33845,38218,36544,34927,37810,53563,4379834,43803,39537,34646,33607,40126,35037,42986,43528,43758,33392,35378,35259,39873,35977,32723,35197,38469,5740176,36295,36436,40288,37888,41085,384…	babo,Lim3,hiw,wuc,Dscam2,Klp68D,unc-104,CG13284,Mmp2,Sulf1,Sema-1b,RhoGAP93B,CG9098,Nrk,Ire1,rho,wnd,gogo,comt,tmod,CG14535,CG7156,enc,CG3703,Dok,ena,Ank2,RhoGAPp190,Ptp99A,Liprin-gamma,pros,klar,Liprin-alpha,CG32006,cona,mtm,drpr,AGO1,Gli,thoc5,gukh,stnB,Eph,CG32137,crok,slp1,Rcd7,beat-IIIc,ssh,Cad99C,RhoGAP100F,aop,Dap160,Lar,Nrt,brp,B-H2,brat,scrt,CG34340,jeb,Drl-2,cmpy,betaTub60D,neur,kst,dil…
	GO:0007610	behavior	4.4351e-09	-19.2337	3.048e-07	540	59	0.110075	536	10917	32429,34170,35832,32158,36876,34385,45840,5740544,2768670,46194,31718,31248,39617,41612,46027,32619,42567,326116,38168,42561,35977,36849,34648,42707,37066,2768858,41938,41247,37888,31364,41616,48973,41085,36010,49701,31271,38504,45338,33739,34192,38863,46015,44355,32846,42310,32754,36964,45976,41363,31071,326198,38218,31002,48971,39293,41182,37781,35940,38491	hiw,Akap200,mtt,cac,unc-104,Cdk5alpha,cpo,futsch,dpr9,Spn,Tbh,sgg,DCX-EMAP,sim,kermit,para,CASK,tau,rho,GABA-B-R2,brp,DAT,aret,klg,Sema-5c,dpr,Sap47,Syn,betaTub60D,Fas2,2mit,Src64B,neur,dila,gish,w,tipE,na,qtc,Sema-1a,Ank2,tutl,drl,Bx,unc79,CG42684,CG14478,retn,pros,CG3638,Krn,drpr,Appl,Atpalpha,Mob2,FoxP,TBPH,ltd,ens
	GO:0045165	cell fate commitment	6.60311e-09	-18.8357	4.4864e-07	478	54	0.100746	536	10917	43825,44786,39619,35997,33392,41612,117407,43234,38321,45278,42358,42567,326116,38168,32005,35197,31068,32723,42210,42707,36295,43146,34277,44849,41704,33608,31883,44543,43656,41085,38963,32544,32039,31290,43087,3772396,33739,44856,44861,46015,38961,40105,36606,41363,317817,36125,36544,39833,36555,38231,41491,33607,42672,31391	sv,nerfin-1,Tom,Mmp2,aop,sim,Tsp68C,ro,dos,csw,Ire1,CASK,tau,rho,CG32676,brat,CG14624,B-H2,gl,klg,jeb,boss,gcm,pnr,rdx,slp2,lz,enc,tll,neur,Unr,Gbeta13F,sev,rst,msi,seq,qtc,ru,sdt,tutl,Cbl,CG32206,phyl,pros,CG32006,stan,AGO1,aos,mam,alpha-Spec,svp,slp1,loco,peb
	GO:0032879	regulation of localization	1.23618e-08	-18.2087	8.3046e-07	270	37	0.0690299	536	10917	3.21584e+187	cac,Syt4,sgg,Rab5,Lar,CASK,GABA-B-R2,comt,brat,crb,Teh1,CG9426,rdx,comm,enc,cmpy,CadN,Abl,Seipin,didum,gish,CdsA,tipE,step,Sema-1a,ru,ena,Fhos,corn,pros,Liprin-alpha,NKAIN,stnB,tamo,ltd,ens,CanB
	GO:0007417	central nervous system development	1.37581e-08	-18.1016	9.14e-07	236	34	0.0634328	536	10917	3.59003e+169	babo,Ror,sim,csw,dan,rho,Nrt,brat,Sema-5c,Ced-12,grim,tll,Abl,Fas2,Src64B,neur,SoxN,Sema-1a,RhoGAPp190,pros,CG3638,eya,stan,alpha-Spec,mam,svp,elav,Eph,Hem,TBPH,Apc,loco,robo3,ssh
	GO:0045467	R7 cell development	1.61925e-08	-17.9387	1.0639e-06	21	10	0.0186567	536	10917	2.49072e+52	Liprin-alpha,RhoGAP100F,sev,seq,boss,aop,lz,CadN,Lar,phyl
	GO:0023051	regulation of signaling	1.71941e-08	-17.8787	1.1174e-06	688	68	0.126866	536	10917	34582,41833,35900,32429,34170,43806,32158,33262,35997,40224,53437,31248,42496,33840,42567,38168,47091,32674,41310,42896,41704,34681,41938,31364,36897,38082,53472,38863,38961,32754,36606,38755,4379834,44642,37451,39619,40876,32874,33392,38321,46027,35378,42561,35977,40205,35197,36295,34633,36554,40288,2768944,41085,44275,31229,36881,34431,38178,35425,44129,326198,36125,31537,39833,38231,38424,3139…	kek2,SIDL,babo,hiw,Akap200,CG9935,cac,dock,Mmp2,rdgC,Sulf1,sgg,RhoGAP93B,CG9098,CASK,rho,comt,RSG7,Tsp86D,crb,rdx,spict,Sap47,Fas2,inaC,ebd1,Aplip1,Ank2,Cbl,CG42684,phyl,tow,stnB,Apc,MESK2,Tom,Syt4,CG42450,aop,dos,kermit,Dap160,GABA-B-R2,brp,CG42674,brat,jeb,Ced-12,RN-tre,cmpy,rho-5,neur,SoxN,boi,CG5522,CG5337,CG7852,step,hbs,Krn,stan,CG5937,aos,alpha-Spec,sty,peb,loco,plx
	GO:0001738	morphogenesis of a polarized epithelium	2.07072e-08	-17.6928	1.3313e-06	103	21	0.0391791	536	10917	4.97013e+105	gish,sev,Tom,aop,hbs,sdt,ro,kermit,mirr,Krn,stan,tow,aos,crb,sano,svp,rdx,CadN,sty,fw,peb
	GO:0022604	regulation of cell morphogenesis	2.27936e-08	-17.5968	1.4498e-06	163	27	0.0503731	536	10917	4.97013e+137	gish,DAAM,unc-104,seq,Sema-1a,Dok,Sra-1,ena,Fhos,tutl,RhoGAPp190,kat-60L1,CG3618,Lar,CASK,pros,stan,Liprin-alpha,CG42674,alpha-Spec,CG7115,Atpalpha,Hem,CadN,Abl,Fas2,ssh
	GO:0051963	regulation of synapse assembly	2.47852e-08	-17.513	1.5599e-06	86	19	0.0354478	536	10917	3.24293e+96	hiw,cac,unc-104,futsch,sgg,Ank2,Liprin-gamma,CASK,stan,brat,alpha-Spec,spict,Mob2,Fas2,TBPH,Abl,Src64B,Sdc,PIP5K59B
	GO:0010646	regulation of cell communication	2.88956e-08	-17.3596	1.7997e-06	697	68	0.126866	536	10917	34582,41833,35900,32429,34170,43806,32158,33262,35997,40224,53437,31248,42496,33840,42567,38168,47091,32674,41310,42896,41704,34681,41938,31364,36897,38082,53472,38863,38961,32754,36606,38755,4379834,44642,37451,39619,40876,32874,33392,38321,46027,35378,42561,35977,40205,35197,36295,34633,36554,40288,2768944,41085,44275,31229,36881,34431,38178,35425,44129,326198,36125,31537,39833,38231,38424,3139…	kek2,SIDL,babo,hiw,Akap200,CG9935,cac,dock,Mmp2,rdgC,Sulf1,sgg,RhoGAP93B,CG9098,CASK,rho,comt,RSG7,Tsp86D,crb,rdx,spict,Sap47,Fas2,inaC,ebd1,Aplip1,Ank2,Cbl,CG42684,phyl,tow,stnB,Apc,MESK2,Tom,Syt4,CG42450,aop,dos,kermit,Dap160,GABA-B-R2,brp,CG42674,brat,jeb,Ced-12,RN-tre,cmpy,rho-5,neur,SoxN,boi,CG5522,CG5337,CG7852,step,hbs,Krn,stan,CG5937,aos,alpha-Spec,sty,peb,loco,plx
	GO:0042067	establishment of ommatidial planar polarity	3.05149e-08	-17.3051	1.8809e-06	62	16	0.0298507	536	10917	3.61255e+80	stan,gish,aos,sev,svp,sano,rdx,aop,hbs,CadN,ro,sty,peb,fw,mirr,Krn
	GO:0071840	cellular component organization or biogenesis	3.26289e-08	-17.2381	1.9907e-06	2347	168	0.313433	536	10917	35900,35184,32429,36401,38788,39332,36876,35021,35997,53437,37007,42496,33840,36445,42358,38168,40143,40225,47091,43633,34073,42187,44543,31045,31667,37201,38863,32743,43469,37552,41363,38067,249072,317817,42213,33845,38218,36544,34927,37810,53563,4379834,43803,39537,34646,33607,40126,35037,42986,43528,43758,33392,35378,35259,39873,35977,32723,35197,38469,5740176,36295,36436,40288,37888,41085,384…	babo,Lim3,hiw,wuc,Dscam2,Klp68D,unc-104,CG13284,Mmp2,Sulf1,Sema-1b,RhoGAP93B,CG9098,Nrk,Ire1,rho,wnd,gogo,comt,tmod,CG14535,CG7156,enc,CG3703,Dok,ena,Ank2,RhoGAPp190,Ptp99A,Liprin-gamma,pros,klar,Liprin-alpha,CG32006,cona,mtm,drpr,AGO1,Gli,thoc5,gukh,stnB,Eph,CG32137,crok,slp1,Rcd7,beat-IIIc,ssh,Cad99C,RhoGAP100F,aop,Dap160,Lar,Nrt,brp,B-H2,brat,scrt,CG34340,jeb,Drl-2,cmpy,betaTub60D,neur,kst,dil…
	GO:0042706	eye photoreceptor cell fate commitment	3.67512e-08	-17.1191	2.1974e-06	55	15	0.0279851	536	10917	3.61253e+74	stan,sev,gl,svp,klg,ru,boss,aop,dos,csw,ro,Cbl,phyl,Ire1,pros
	GO:0001752	compound eye photoreceptor fate commitment	3.67512e-08	-17.1191	2.1974e-06	55	15	0.0279851	536	10917	3.61253e+74	stan,sev,gl,svp,klg,ru,boss,aop,dos,csw,ro,Cbl,phyl,Ire1,pros
	GO:0048638	regulation of developmental growth	4.62627e-08	-16.8889	2.7387e-06	127	23	0.0429104	536	10917	3.24293e+119	hiw,cac,unc-104,seq,futsch,Ank2,sgg,Liprin-gamma,Lar,CASK,Liprin-alpha,brat,crb,alpha-Spec,spict,Mob2,CadN,TBPH,Fas2,Abl,Sdc,Src64B,PIP5K59B
	GO:0007416	synapse assembly	4.79585e-08	-16.8529	2.8112e-06	56	15	0.0279851	536	10917	2.49072e+75	Liprin-alpha,CG34127,AGO1,Gli,Prosap,lbm,jeb,Atpalpha,Sema-1a,comm,sgg,Dap160,Lar,pros,repo
	GO:0007163	establishment or maintenance of cell polarity	5.7061e-08	-16.6791	3.3123e-06	192	29	0.0541045	536	10917	4.97013e+145	gish,Kap3,sev,Klp68D,Csk,Khc-73,hbs,sgg,aop,sdt,Rab5,Cbl,ro,csw,CASK,mirr,Krn,stan,aos,crb,sano,svp,rdx,CadN,Apc,sty,peb,loco,fw
	GO:0008582	regulation of synaptic growth at neuromuscular junction	6.44132e-08	-16.5579	3.6929e-06	82	18	0.0335821	536	10917	3.24293e+91	hiw,cac,unc-104,futsch,sgg,Ank2,Liprin-gamma,CASK,brat,alpha-Spec,spict,Mob2,Fas2,TBPH,Abl,Src64B,Sdc,PIP5K59B
	GO:0007164	establishment of tissue polarity	6.5471e-08	-16.5417	3.6929e-06	91	19	0.0354478	536	10917	4.97013e+95	gish,sev,Tom,aop,hbs,ro,kermit,mirr,Krn,stan,tow,aos,sano,svp,rdx,CadN,sty,fw,peb
	GO:0001736	establishment of planar polarity	6.5471e-08	-16.5417	3.6929e-06	91	19	0.0354478	536	10917	4.97013e+95	gish,sev,Tom,aop,hbs,ro,kermit,mirr,Krn,stan,tow,aos,sano,svp,rdx,CadN,sty,fw,peb
	GO:0051716	cellular response to stimulus	7.57977e-08	-16.3952	4.2355e-06	1325	107	0.199627	536	10917	35900,32429,35832,32158,32157,33262,34385,40224,32551,31718,31248,39617,41612,33418,45278,33840,36445,42358,38168,40143,32637,35267,32674,36703,40965,41190,35646,31883,43656,36897,49701,53472,43950,39999,38504,43087,37824,41398,31667,43317,38863,35041,32743,38961,32754,36606,35620,5740362,43585,38057,36544,34840,318046,43803,37099,3885573,42733,33520,39071,41203,33374,43528,43758,39063,34367,3961…	babo,hiw,mtt,cac,CG10362,dock,Cdk5alpha,rdgC,CycD,Tbh,sgg,DCX-EMAP,sim,Rab5,csw,CG9098,Nrk,Ire1,rho,wnd,mthl1,CdGAPr,RSG7,unc-5,DNApol-iota,Rpt3R,Gadd45,lz,tll,inaC,gish,Aplip1,CdsA,Eip75B,tipE,msi,Pask,Csk,Dok,Tusp,Ank2,Lrch,RhoGAPp190,Cbl,CG42684,phyl,Tsp42Ej,CG34384,CG11498,mthl10,AGO1,Rab14,mthl14,Eph,IM23,Octbeta3R,CG13830,cnir,Hsp67Bc,CG8500,Npc2a,Cad99C,RhoGAP100F,PGRP-LC,Ror,Tom,CG42450,a…
	GO:0046552	photoreceptor cell fate commitment	8.01381e-08	-16.3395	4.4365e-06	58	15	0.0279851	536	10917	3.61253e+74	stan,sev,gl,svp,klg,boss,ru,aop,Cbl,csw,dos,ro,phyl,Ire1,pros
	GO:0045596	negative regulation of cell differentiation	9.8335e-08	-16.1349	5.394e-06	122	22	0.0410448	536	10917	4.30874e+112	msi,seq,sgg,aop,ro,gcm2,pros,CG32006,eya,brat,AGO1,Dip3,aos,mam,aret,sdk,gcm,slp2,CadN,slp1,sty,neur
	GO:0044708	single-organism behavior	1.01187e-07	-16.1063	5.5e-06	395	45	0.0839552	536	10917	32429,34170,35832,32158,36876,34385,45840,5740544,2768670,46194,31718,31248,39617,41612,32619,326116,42567,38168,42561,35977,42707,37066,41938,41247,37888,31364,41616,48973,41085,36010,49701,31271,45338,38863,46015,44355,42310,32846,326198,38218,31002,48971,39293,37781,35940	hiw,Akap200,mtt,cac,unc-104,Cdk5alpha,cpo,futsch,dpr9,Spn,Tbh,sgg,DCX-EMAP,sim,para,tau,CASK,rho,GABA-B-R2,brp,klg,Sema-5c,Sap47,Syn,betaTub60D,Fas2,2mit,Src64B,neur,dila,gish,w,na,Ank2,tutl,drl,unc79,Bx,Krn,drpr,Appl,Atpalpha,Mob2,TBPH,ltd
	GO:0007465	R7 cell fate commitment	1.60292e-07	-15.6463	8.6341e-06	20	9	0.016791	536	10917	3.20394e+44	sev,svp,klg,boss,Cbl,csw,dos,phyl,pros
	GO:0010769	regulation of cell morphogenesis involved in differentiation	1.65712e-07	-15.613	8.8463e-06	61	15	0.0279851	536	10917	2.49072e+77	Liprin-alpha,stan,gish,DAAM,unc-104,seq,Sema-1a,Fhos,CadN,tutl,RhoGAPp190,kat-60L1,Lar,pros,ssh
	GO:0044087	regulation of cellular component biogenesis	1.76005e-07	-15.5528	9.3127e-06	202	29	0.0541045	536	10917	3.56803e+146	didum,hiw,DAAM,cac,unc-104,futsch,ena,Ank2,sgg,Fhos,Liprin-gamma,CASK,stan,brat,alpha-Spec,Jupiter,Atf-2,spict,Mob2,enc,NC2alpha,TBPH,Abl,Fas2,Apc,Src64B,Sdc,PIP5K59B,ssh
	GO:0048729	tissue morphogenesis	3.63282e-07	-14.8281	1.9053e-05	320	38	0.0708955	536	10917	3.96193e+192	Tom,aop,Rab5,csw,ro,kermit,rho,mirr,mthl1,crb,sano,jeb,pnr,rdx,CadN,Abl,Src64B,fw,gish,CdsA,sev,Dok,seq,ena,hbs,Fhos,sdt,Cbl,Krn,stan,tow,aos,mam,svp,slp1,sty,loco,peb
	GO:0051129	negative regulation of cellular component organization	5.96022e-07	-14.333	3.0988e-05	114	20	0.0373134	536	10917	4.97013e+101	gish,hiw,CG15923,unc-104,seq,sgg,Liprin-gamma,pros,GABA-B-R2,Z600,Patronin,alpha-Spec,Mob2,spict,obst-A,NC2alpha,CadN,TBPH,Abl,Src64B
	GO:0016199	axon midline choice point recognition	9.23176e-07	-13.8954	4.7583e-05	30	10	0.0186567	536	10917	3.17817e+50	CG32006,alpha-Spec,Sema-1a,comm,slp2,tutl,RhoGAP93B,slp1,Abl,drl
	GO:0010970	microtubule-based transport	9.61701e-07	-13.8546	4.9145e-05	37	11	0.0205224	536	10917	3.60104e+56	dila,didum,Aplip1,Kap3,Klp68D,unc-104,futsch,syd,CG9279,Unc-76,klar
	GO:0048518	positive regulation of biological process	1.47205e-06	-13.4289	7.4588e-05	962	80	0.149254	536	10917	35900,32158,35997,53437,32551,31248,41612,43234,33840,42567,38168,47091,53579,41310,42896,41704,39717,31883,33608,43656,31245,38082,33239,41398,37201,38863,38786,41363,33916,317817,45816,33607,44642,3885573,39089,43825,37451,39063,40876,33392,40715,41096,35378,35662,39441,40205,45922,34648,42210,36295,44849,34277,40014,45821,37447,41085,48973,44275,31229,35680,31075,32039,35425,44856,39004,44129,…	babo,cac,Mmp2,Sulf1,CycD,sgg,sim,ro,CG9098,CASK,rho,comt,Dip3,Tsp86D,crb,rdx,comm,lz,slp2,tll,Seipin,ebd1,Pph13,Csk,ena,Ank2,corn,pros,eya,CG32006,onecut,slp1,Apc,Octbeta3R,MTF-1,sv,MESK2,PGRP-LC,Syt4,aop,kat-60L1,ird1,Dap160,so,mirr,CG42674,rap,aret,gl,jeb,pnr,gcm,grim,Abl,Sdc,neur,Src64B,SoxN,boi,didum,DAAM,sev,step,ru,Fhos,hbs,Bx,retn,repo,Krn,Eip93F,stan,aos,alpha-Spec,mam,Jupiter,Atf-2,7B2,N…
	GO:0007611	learning or memory	1.68277e-06	-13.2951	8.3844e-05	143	22	0.0410448	536	10917	4.97013e+113	gish,w,futsch,Ank2,Tbh,sgg,drl,tau,CASK,rho,Krn,brp,Appl,klg,Mob2,Sap47,Syn,Fas2,2mit,Src64B,neur,ltd
	GO:0050890	cognition	1.68277e-06	-13.2951	8.3844e-05	143	22	0.0410448	536	10917	4.97013e+113	gish,w,futsch,Ank2,Tbh,sgg,drl,CASK,tau,rho,Krn,brp,Appl,klg,Mob2,Sap47,Syn,Fas2,2mit,Src64B,neur,ltd
	GO:0030705	cytoskeleton-dependent intracellular transport	1.72365e-06	-13.2711	8.5171e-05	39	11	0.0205224	536	10917	3.60104e+56	dila,didum,Aplip1,Kap3,Klp68D,unc-104,futsch,CG9279,syd,Unc-76,klar
	GO:0007528	neuromuscular junction development	1.97817e-06	-13.1333	9.6946e-05	73	15	0.0279851	536	10917	2.49072e+77	Liprin-alpha,unc-104,jeb,Atpalpha,futsch,Hem,sgg,Ank2,cmpy,TBPH,Fas2,Dap160,Lar,sff,repo
	GO:0010975	regulation of neuron projection development	2.40213e-06	-12.9392	0.00011644	65	14	0.0261194	536	10917	3.61252e+72	stan,Liprin-alpha,DAAM,unc-104,Sema-1a,seq,comm,CadN,tutl,kat-60L1,RhoGAPp190,Lar,pros,ssh
	GO:0048522	positive regulation of cellular process	2.41481e-06	-12.9339	0.00011644	847	72	0.134328	536	10917	35900,32158,53437,32551,31248,41612,43234,33840,38168,47091,53579,41310,42896,41704,39717,31883,33608,43656,38082,33239,41398,37201,38863,38786,33916,317817,45816,33607,3885573,39089,43825,37451,39063,40876,33392,40715,41096,35378,35662,39441,40205,45922,42210,34648,36295,44849,34277,40014,37447,41085,48973,44275,31229,35680,31075,32039,35425,44856,39004,44129,32846,45976,326198,44936,36125,39833…	babo,cac,Sulf1,CycD,sgg,sim,ro,CG9098,rho,comt,Dip3,Tsp86D,crb,rdx,comm,lz,slp2,tll,ebd1,Pph13,Csk,ena,Ank2,corn,eya,CG32006,onecut,slp1,Octbeta3R,MTF-1,sv,MESK2,PGRP-LC,Syt4,aop,kat-60L1,ird1,Dap160,so,mirr,CG42674,rap,gl,aret,jeb,pnr,gcm,grim,Sdc,neur,Src64B,SoxN,boi,didum,DAAM,sev,step,ru,Fhos,hbs,Bx,retn,Krn,Eip93F,stan,aos,alpha-Spec,mam,Jupiter,Atf-2,7B2,NC2alpha
	GO:0002009	morphogenesis of an epithelium	2.76801e-06	-12.7974	0.0001324	294	34	0.0634328	536	10917	3.96193e+172	Tom,aop,Rab5,csw,ro,kermit,rho,mirr,crb,sano,pnr,rdx,CadN,Abl,Src64B,fw,gish,CdsA,sev,Dok,seq,ena,Fhos,hbs,sdt,Cbl,Krn,stan,tow,aos,svp,sty,loco,peb
	GO:0035556	intracellular signal transduction	2.95102e-06	-12.7334	0.00014003	308	35	0.0652985	536	10917	4.37583e+177	RhoGAP100F,CG10362,Cdk5alpha,CycD,CG42450,rdgC,aop,DCX-EMAP,Rab5,Socs16D,CG9098,CdGAPr,RSG7,Gadd45,grim,inaC,Src64B,RabX4,Aplip1,Dok,Tusp,RhoBTB,Lrch,RhoGAPp190,CG9121,CG42684,phyl,Krn,CG34384,Gyc32E,Rab14,Atf-2,cnir,CG8500,ltd
	GO:0042048	olfactory behavior	3.07487e-06	-12.6922	0.00014476	105	18	0.0335821	536	10917	4.97015e+93	gish,cpo,futsch,Spn,sgg,drl,tau,rho,GABA-B-R2,Krn,klg,Sema-5c,Mob2,Syn,Fas2,neur,Src64B,ltd
	GO:0050770	regulation of axonogenesis	3.37199e-06	-12.6	0.00015751	34	10	0.0186567	536	10917	3.61252e+52	stan,Liprin-alpha,DAAM,Sema-1a,seq,CadN,RhoGAPp190,Lar,pros,ssh
	GO:0051049	regulation of transport	3.77152e-06	-12.488	0.00017481	173	24	0.0447761	536	10917	4.97014e+121	gish,tipE,step,cac,Syt4,ru,sgg,Rab5,corn,CASK,GABA-B-R2,comt,NKAIN,brat,crb,Teh1,CG9426,stnB,comm,rdx,cmpy,Abl,tamo,CanB
	GO:0008355	olfactory learning	4.20609e-06	-12.379	0.00019345	59	13	0.0242537	536	10917	4.97014e+68	gish,klg,futsch,Mob2,sgg,Syn,Fas2,drl,tau,rho,Src64B,Krn,ltd
	GO:0016198	axon choice point recognition	4.51545e-06	-12.308	0.00020609	35	10	0.0186567	536	10917	3.17817e+50	CG32006,alpha-Spec,Sema-1a,comm,slp2,tutl,RhoGAP93B,slp1,Abl,drl
	GO:0009888	tissue development	4.75079e-06	-12.2572	0.00021519	753	65	0.121269	536	10917	43528,34170,39619,31248,33392,41612,33418,43234,45278,46027,39696,42567,38168,39441,35058,32637,41310,42896,37185,32420,36295,44849,34633,41704,36554,33608,35070,45821,48973,41085,32162,38418,49701,43950,32039,3772396,31667,36258,37201,44129,39004,44861,38961,38816,41363,44936,326198,36125,317817,33916,38218,38755,34927,39583,39833,36555,38231,41491,39445,33607,38424,33314,31391,42672,38491	Cad99C,Akap200,Tom,sgg,aop,sim,Rab5,ro,csw,kermit,comm3,CASK,rho,mirr,qua,mthl1,Tsp86D,crb,sano,CG9509,jeb,pnr,Ced-12,rdx,RN-tre,slp2,CadN,Abl,Src64B,neur,fw,kst,gish,CdsA,sev,seq,Dok,ths,ena,hbs,Fhos,sdt,Cbl,qm,pros,Eip93F,Krn,stan,CG32006,eya,drpr,tow,Gli,bbg,aos,mam,alpha-Spec,svp,Klc,slp1,sty,robo3,peb,loco,ens
	GO:0008306	associative learning	5.07916e-06	-12.1904	0.00022569	69	14	0.0261194	536	10917	4.97014e+73	gish,klg,futsch,Mob2,sgg,Sap47,Syn,Fas2,drl,tau,rho,Src64B,Krn,ltd
	GO:0031290	retinal ganglion cell axon guidance	5.09592e-06	-12.1871	0.00022569	11	6	0.011194	536	10917	3.42774e+30	gcm,CdGAPr,Liprin-alpha,gogo,CadN,Lar
	GO:0045665	negative regulation of neuron differentiation	5.09592e-06	-12.1871	0.00022569	11	6	0.011194	536	10917	3.17817e+30	CG32006,slp2,aop,slp1,ro,sdk
	GO:0009966	regulation of signal transduction	5.21839e-06	-12.1633	0.00022942	617	56	0.104478	536	10917	34582,41833,35900,37451,32429,34170,39619,33262,35997,40224,53437,32874,31248,33392,38321,42496,35378,46027,33840,38168,32674,40205,41310,42896,36295,34633,41704,34681,36554,40288,2768944,31364,36897,41085,44275,31229,38082,36881,53472,34431,38178,35425,44129,38961,32754,36606,326198,36125,31537,38755,39833,44642,38424,42672,31391,40704	kek2,SIDL,babo,MESK2,hiw,Akap200,Tom,dock,Mmp2,rdgC,Sulf1,CG42450,sgg,aop,dos,RhoGAP93B,Dap160,kermit,CG9098,rho,RSG7,CG42674,Tsp86D,crb,jeb,Ced-12,rdx,spict,RN-tre,cmpy,rho-5,Fas2,inaC,neur,SoxN,boi,ebd1,CG5522,Aplip1,CG5337,CG7852,step,hbs,Cbl,CG42684,phyl,Krn,stan,CG5937,tow,aos,Apc,sty,loco,peb,plx
	GO:0007389	pattern specification process	5.25682e-06	-12.156	0.00022942	513	49	0.0914179	536	10917	43528,42115,39619,53437,31248,33418,38321,45278,43023,38168,35197,32723,36703,40046,53579,43146,34277,44849,33608,44543,31883,43656,35070,41085,31229,35680,49701,31075,32039,37201,44856,32846,38961,40105,36606,45976,326198,317817,36125,32724,38218,34927,36544,39833,33607,44642,38424,42672,31391	Cad99C,sll,Tom,Sulf1,sgg,Rab5,dos,csw,dan,rho,brat,B-H2,unc-5,CG14073,Dip3,boss,gcm,pnr,slp2,enc,lz,tll,CadN,neur,boi,didum,gish,DAAM,sev,ena,ru,Bx,Cbl,CG32206,phyl,retn,Krn,CG32006,stan,B-H1,drpr,Gli,AGO1,aos,slp1,Apc,sty,loco,peb
	GO:0040008	regulation of growth	5.41552e-06	-12.1262	0.00023463	238	29	0.0541045	536	10917	3.59003e+149	babo,hiw,step,cac,unc-104,Csk,seq,futsch,CycD,Ank2,sgg,Liprin-gamma,Lar,CASK,Liprin-alpha,drpr,brat,crb,alpha-Spec,spict,Mob2,cmpy,CadN,TBPH,Abl,Fas2,Src64B,Sdc,PIP5K59B
	GO:0007612	learning	5.58294e-06	-12.0958	0.00024015	79	15	0.0279851	536	10917	4.97014e+78	gish,klg,futsch,Mob2,sgg,Tbh,Sap47,Syn,drl,Fas2,tau,rho,Src64B,Krn,ltd
	GO:2000027	regulation of organ morphogenesis	5.7455e-06	-12.0671	0.0002423	89	16	0.0298507	536	10917	3.61254e+79	stan,sv,gish,Dip3,Akap200,sev,Mlf,aop,lz,ro,Abl,csw,Apc,sty,pros,neur
	GO:0031344	regulation of cell projection organization	5.7455e-06	-12.0671	0.0002423	89	16	0.0298507	536	10917	4.35283e+82	Cad99C,DAAM,unc-104,seq,Sema-1a,ena,tutl,RhoGAPp190,kat-60L1,Lar,pros,stan,Liprin-alpha,comm,CadN,ssh
	GO:0003008	system process	5.75464e-06	-12.0655	0.0002423	559	52	0.0970149	536	10917	246666,32071,31292,32158,39332,5740544,2768670,40224,50320,31718,31248,39617,42567,326116,38168,35977,42210,42707,37066,34408,41381,44849,2768858,43146,41938,41247,31364,36897,41616,48973,41085,37447,40580,49701,31271,32572,45338,34192,44856,39004,38863,44355,41363,326198,38251,31002,48971,39293,35789,37843,42672,35940	Obp51a,Kap3,kirre,cac,Klp68D,futsch,dpr9,rdgC,dpr12,Tbh,sgg,DCX-EMAP,CASK,tau,rho,brp,gl,klg,Sema-5c,dpr19,dpr5,pnr,dpr,boss,Sap47,Syn,Fas2,inaC,2mit,Src64B,neur,Sdc,rpk,gish,w,dpr18,na,Sema-1a,ru,Fhos,Ank2,drl,pros,Krn,Tmhs,Appl,Atpalpha,Mob2,Obp44a,sei,loco,ltd
	GO:0046532	regulation of photoreceptor cell differentiation	5.98033e-06	-12.027	0.00025004	36	10	0.0186567	536	10917	4.38255e+49	sv,Dip3,sev,sdk,aop,csw,ro,sty,neur,pros
	GO:0006357	regulation of transcription from RNA polymerase II promoter	7.39667e-06	-11.8145	0.00030712	418	42	0.0783582	536	10917	4.03704e+212	Aef1,sv,hiw,nerfin-1,wuc,aop,sim,ro,dos,csw,so,mirr,B-H2,Dip3,scrt,gl,toe,pnr,gcm,lz,slp2,tll,SoxN,sev,seq,Side,retn,pros,Mio,repo,Eip93F,CG32006,eya,B-H1,onecut,mam,Atf-2,NC2alpha,slp1,sty,MTF-1,peb
	GO:0048646	anatomical structure formation involved in morphogenesis	7.7241e-06	-11.7712	0.0003185	535	50	0.0932836	536	10917	43528,32071,31292,39619,33262,43571,35997,33418,43023,35662,38168,39441,32637,32723,36703,34648,36295,34633,41704,33608,44543,31883,45821,48973,41085,36010,35680,49701,31075,31290,34702,42443,41398,37201,44129,36606,38067,33916,317817,39673,32724,38620,36544,38231,36555,39445,40462,33607,44642,43235	Cad99C,Kap3,kirre,Tom,dock,Sry-alpha,Mmp2,Rab5,dan,so,rho,mirr,mthl1,B-H2,unc-5,aret,jeb,Ced-12,rdx,slp2,enc,lz,Abl,Src64B,neur,dila,didum,gish,DAAM,rst,CG5142,CG15923,Csk,ena,hbs,phyl,klar,eya,CG32006,Z600,B-H1,blanks,AGO1,alpha-Spec,mam,Klc,Hem,slp1,Apc,T48
	GO:0003002	regionalization	9.78416e-06	-11.5347	0.00039898	466	45	0.0839552	536	10917	43528,42115,39619,31248,33418,38321,45278,43023,38168,35197,32723,36703,40046,53579,43146,34277,44849,33608,31883,44543,43656,41085,31229,35680,31075,32039,37201,44856,32846,38961,40105,36606,45976,36125,317817,32724,38218,36544,34927,39833,33607,44642,38424,42672,31391	Cad99C,sll,Tom,sgg,Rab5,dos,csw,dan,rho,brat,B-H2,unc-5,CG14073,Dip3,boss,gcm,pnr,slp2,lz,enc,tll,neur,boi,didum,DAAM,sev,ena,ru,Bx,Cbl,CG32206,phyl,retn,stan,CG32006,B-H1,drpr,AGO1,Gli,aos,slp1,Apc,sty,loco,peb
	GO:0051179	localization	9.80924e-06	-11.5322	0.00039898	1920	133	0.248134	536	10917	41833,36488,31456,43806,39332,36876,35021,39461,32619,47091,34268,36897,40580,49701,38504,37201,38863,38651,41426,38961,38816,41363,32290,35620,38067,249072,33845,38218,34927,37810,33247,53563,4379834,35578,37864,33520,318563,39063,40876,33392,35378,31179,35977,35197,36849,41085,38418,42960,35680,36010,31271,35425,40551,31071,326198,44936,32152,39583,37129,49968,40462,40124,42672,34170,32158,3310…	SIDL,CG42321,SK,CG9935,Klp68D,unc-104,CG13284,Ent3,para,comt,Oatp30B,inaC,rpk,gish,tipE,ena,Ank2,Cralbp,HisCl1,Cbl,qm,pros,Syt12,Tsp42Ej,klar,Liprin-alpha,mtm,drpr,Gli,thoc5,Eaat2,gukh,stnB,CG3409,tamo,cnir,CG31030,PGRP-LC,Syt4,aop,Dap160,Unc-76,brp,brat,DAT,neur,kst,RabX4,didum,dila,w,step,CG1090,CG3638,Krn,Eip93F,wisp,bbg,CG43066,Caps,Hem,CG9279,loco,Akap200,cac,tty,Sra-1,futsch,Rab5,out,csw,CA…
	GO:0007043	cell-cell junction assembly	1.00306e-05	-11.5099	0.00040522	46	11	0.0205224	536	10917	3.53433e+54	vari,bou,Gli,kirre,crb,Atpalpha,sdt,crok,loco,Src64B,kst
	GO:0007635	chemosensory behavior	1.01848e-05	-11.4946	0.00040869	114	18	0.0335821	536	10917	4.97015e+93	gish,cpo,futsch,Spn,sgg,drl,tau,rho,GABA-B-R2,Krn,klg,Sema-5c,Mob2,Syn,Fas2,neur,Src64B,ltd
	GO:0060341	regulation of cellular localization	1.11947e-05	-11.4001	0.00044622	137	20	0.0373134	536	10917	3.56805e+101	didum,gish,cac,Syt4,ru,sgg,CASK,corn,pros,GABA-B-R2,brat,crb,CG9426,stnB,rdx,enc,cmpy,Abl,tamo,CanB
	GO:0009987	cellular process	1.41403e-05	-11.1665	0.0005599	6152	349	0.651119	536	10917	5740876,35184,32429,35832,43806,39332,35997,39617,37007,43234,42496,32619,33840,36445,41625,32637,47091,34073,35646,41704,43656,43736,49701,37542,39999,38504,43317,37201,40515,43469,38961,35620,5740362,249072,317817,42213,45816,53563,4379834,32230,39537,34646,33607,40126,33520,36669,43758,39063,40876,33392,117407,41096,35378,35259,31179,42561,35977,35330,35197,38469,5740176,31017,36295,40471,3643…	CG34452,Lim3,hiw,mtt,CG9935,Klp68D,Mmp2,DCX-EMAP,Sema-1b,ro,RhoGAP93B,para,CG9098,Nrk,Ace,mthl1,comt,CG14535,Gadd45,rdx,tll,Ef1alpha100E,gish,ari-2,Eip75B,tipE,Tusp,ena,nrm,Ptp99A,Cbl,Tsp42Ej,CG34384,Liprin-alpha,CG32006,cona,onecut,gukh,stnB,CG3812,CG32137,crok,slp1,Rcd7,cnir,CG10253,RhoGAP100F,PGRP-LC,Syt4,aop,Tsp68C,ird1,Dap160,Lar,Unc-76,GABA-B-R2,brp,Cen,brat,scrt,CG34340,sdk,jeb,CG11426,Drl…
	GO:0007166	cell surface receptor signaling pathway	1.64714e-05	-11.0139	0.00064791	535	49	0.0914179	536	10917	35900,33374,43528,32429,39063,35832,34367,39619,33262,31718,31248,38321,45278,46027,36445,38168,39441,42561,32637,31744,44849,36436,43146,43656,45821,36897,31229,49701,43950,32544,32039,34878,34192,44856,36258,38961,40105,326198,5740362,36125,38057,36555,43803,318046,40644,37099,3885573,38424,31391	babo,Npc2a,Cad99C,hiw,PGRP-LC,mtt,Ror,Tom,dock,Tbh,sgg,dos,csw,kermit,Nrk,rho,mirr,GABA-B-R2,mthl1,Gbeta5,pnr,Drl-2,boss,tll,Abl,inaC,boi,gish,CdsA,Gbeta13F,sev,GABA-B-R1,Sema-1a,ru,ths,Cbl,CG32206,Krn,CG34384,stan,mthl10,mam,Eph,mthl14,7B2,IM23,Octbeta3R,sty,peb
	GO:0023057	negative regulation of signaling	1.78778e-05	-10.932	0.00069864	240	28	0.0522388	536	10917	3.45823e+139	kek2,hiw,Akap200,Tom,dock,Mmp2,Sulf1,CG42450,Ank2,sgg,aop,Cbl,Dap160,CG42684,stan,RSG7,tow,aos,crb,jeb,spict,rdx,cmpy,Fas2,Apc,sty,loco,peb
	GO:0016192	vesicle-mediated transport	1.91033e-05	-10.8657	0.00073905	523	48	0.0895522	536	10917	41833,39063,32158,36876,35021,40876,41861,33392,33418,45278,35378,42567,31179,39485,40544,47091,35197,40912,44819,34633,39717,41247,36897,38418,42960,53472,35425,33739,32846,38961,32683,37536,35620,31071,41363,44936,249072,33845,31537,38218,4379834,34840,40462,49968,43660,33520,44317,35940	SIDL,PGRP-LC,cac,unc-104,CG13284,Syt4,Sra-1,aop,Rab5,csw,Dap160,CASK,Unc-76,Syx13,Syt14,comt,brat,CG34127,g,Ced-12,comm,Syn,inaC,kst,RabX4,Aplip1,step,qtc,Bx,Cbl,wus,Vps35,Tsp42Ej,CG3638,pros,Eip93F,Liprin-alpha,mtm,CG5937,drpr,stnB,Rab14,Hem,Caps,CG12071,cnir,CanB,ltd
	GO:0034329	cell junction assembly	1.91592e-05	-10.8627	0.00073905	49	11	0.0205224	536	10917	3.53433e+54	vari,bou,Gli,kirre,crb,Atpalpha,sdt,crok,loco,Src64B,kst
	GO:0060429	epithelium development	2.21279e-05	-10.7187	0.00084331	541	49	0.0914179	536	10917	43528,39619,31248,33392,33418,43234,45278,46027,42567,38168,39441,35058,41310,42896,37185,44849,34633,41704,36554,35070,45821,48973,41085,32162,38418,49701,43950,32039,31667,3772396,37201,44129,39004,44861,38961,38816,326198,33916,36125,38755,34927,39583,39833,38231,41491,39445,38424,42672,31391	Cad99C,Tom,sgg,aop,Rab5,ro,csw,kermit,CASK,rho,mirr,qua,Tsp86D,crb,sano,pnr,Ced-12,rdx,RN-tre,CadN,Abl,Src64B,neur,fw,kst,gish,CdsA,sev,Dok,seq,ena,hbs,Fhos,sdt,Cbl,qm,Krn,eya,stan,tow,Gli,bbg,aos,alpha-Spec,svp,Klc,sty,loco,peb
	GO:0050877	neurological system process	2.2144e-05	-10.7179	0.00084331	511	47	0.0876866	536	10917	246666,32071,32158,39332,5740544,2768670,40224,50320,31718,31248,39617,326116,42567,38168,35977,42210,42707,37066,34408,41381,2768858,43146,41938,41247,31364,36897,41616,48973,41085,37447,40580,49701,31271,32572,45338,34192,38863,44355,41363,326198,38251,31002,48971,39293,35789,37843,35940	Obp51a,Kap3,cac,Klp68D,futsch,dpr9,rdgC,dpr12,Tbh,sgg,DCX-EMAP,tau,CASK,rho,brp,gl,klg,Sema-5c,dpr19,dpr5,dpr,boss,Sap47,Syn,Fas2,inaC,2mit,Src64B,neur,Sdc,rpk,gish,w,dpr18,na,Sema-1a,Ank2,drl,pros,Krn,Tmhs,Appl,Atpalpha,Mob2,Obp44a,sei,ltd
	GO:0007626	locomotory behavior	2.35926e-05	-10.6546	0.00089278	180	23	0.0429104	536	10917	3.60103e+114	dila,hiw,na,cac,unc-104,Cdk5alpha,Sema-1a,Tbh,sgg,DCX-EMAP,sim,tutl,Bx,unc79,kermit,CASK,brp,drpr,Atpalpha,Sema-5c,TBPH,neur,ens
	GO:0010648	negative regulation of cell communication	2.42833e-05	-10.6257	0.00091314	244	28	0.0522388	536	10917	3.45823e+139	kek2,hiw,Akap200,Tom,dock,Mmp2,Sulf1,CG42450,Ank2,sgg,aop,Cbl,Dap160,CG42684,stan,RSG7,tow,aos,crb,jeb,spict,rdx,cmpy,Fas2,Apc,sty,loco,peb
	GO:0030534	adult behavior	2.9071e-05	-10.4458	0.0010863	146	20	0.0373134	536	10917	3.60103e+101	dila,hiw,Akap200,mtt,na,cac,Cdk5alpha,dpr9,Tbh,sim,DCX-EMAP,tutl,CASK,rho,brp,klg,Atpalpha,Syn,Fas2,TBPH
	GO:0048583	regulation of response to stimulus	3.69169e-05	-10.2068	0.001371	835	67	0.125	536	10917	34582,41833,35900,32429,34170,33262,35997,40224,53437,31718,31248,42496,33840,38168,32674,41310,42896,35646,41704,34681,31364,36897,38082,53472,38961,32754,36606,249072,38755,44642,37451,39063,39619,32874,33392,41096,38321,35259,46027,35378,40205,36295,44849,34633,36554,35070,40288,2768944,41085,44275,31229,36881,34431,38178,35425,34192,44129,326198,36125,32152,31537,39833,36771,38424,31391,42672…	kek2,SIDL,babo,hiw,Akap200,dock,Mmp2,rdgC,Sulf1,Tbh,sgg,RhoGAP93B,CG9098,rho,RSG7,Tsp86D,crb,Gadd45,rdx,spict,Fas2,inaC,ebd1,Aplip1,Cbl,CG42684,phyl,Liprin-alpha,tow,Apc,MESK2,PGRP-LC,Tom,CG42450,aop,ird1,dos,Lar,kermit,Dap160,CG42674,jeb,pnr,Ced-12,RN-tre,CadN,cmpy,rho-5,neur,SoxN,boi,CG5522,CG5337,CG7852,step,Sema-1a,hbs,Krn,stan,wisp,CG5937,aos,SP2353,sty,peb,loco,plx
	GO:0009889	regulation of biosynthetic process	3.92819e-05	-10.1447	0.0014498	951	74	0.13806	536	10917	40370,35184,32429,44786,43422,36401,41423,36064,31248,41612,43234,45278,53579,31883,33608,43656,42110,31245,38963,39999,33239,43087,38961,41363,33916,317817,32724,36544,38620,45816,33607,3885573,39089,39071,43825,39063,33392,41096,38321,43023,35662,42561,39441,35197,32723,38469,42210,5740176,34648,39418,44849,34277,44275,32039,34878,3772396,35168,32846,34280,45976,35402,44936,47285,32152,36555,37…	Aef1,Lim3,hiw,nerfin-1,eIF4E-6,wuc,l(3)neo38,gem,sgg,sim,ro,csw,Dip3,lz,slp2,tll,Hmx,Seipin,Unr,Eip75B,Pph13,msi,Cbl,pros,eya,CG32006,B-H1,AGO1,blanks,onecut,slp1,Octbeta3R,MTF-1,Hsp67Bc,sv,PGRP-LC,aop,ird1,dos,dan,so,GABA-B-R2,mirr,brat,B-H2,scrt,gl,CG34340,aret,toe,pnr,gcm,SoxN,sev,GABA-B-R1,seq,Side,Bx,gcm2,retn,Mio,Eip93F,repo,wisp,mam,nvy,svp,Atf-2,Mlf,NC2alpha,FoxP,sty,peb,CG18599
	GO:0031323	regulation of cellular metabolic process	4.05073e-05	-10.114	0.0014858	1357	98	0.182836	536	10917	40370,41833,35900,35184,32429,44786,43422,36401,41423,36064,32551,31248,41612,43234,42496,45278,42358,53579,42896,41704,39717,31883,33608,43656,42110,31245,38963,53472,39999,33239,43087,38961,41363,33916,317817,32724,36544,38620,45816,31000,33607,3885573,39089,34370,39071,43825,39063,33392,38321,41096,35378,43023,35662,39441,42561,35197,32723,38469,34648,5740176,42210,36295,39418,34633,43146,4484…	Aef1,SIDL,babo,Lim3,hiw,nerfin-1,eIF4E-6,wuc,l(3)neo38,gem,CycD,sgg,sim,ro,RhoGAP93B,csw,Ire1,Dip3,crb,rdx,comm,lz,slp2,tll,Hmx,Seipin,Unr,Aplip1,Eip75B,Pph13,msi,Cbl,pros,eya,CG32006,B-H1,AGO1,blanks,onecut,elav,slp1,Octbeta3R,MTF-1,Rsf1,Hsp67Bc,sv,PGRP-LC,aop,dos,ird1,Dap160,dan,so,mirr,GABA-B-R2,brat,B-H2,scrt,aret,CG34340,gl,jeb,toe,Ced-12,boss,pnr,gcm,RN-tre,Src64B,SoxN,CG5337,sev,step,Rox8,…
	GO:0045216	cell-cell junction organization	4.662e-05	-9.97348	0.0016893	63	12	0.0223881	536	10917	3.53433e+59	vari,bou,Gli,kirre,crb,Csk,Atpalpha,sdt,crok,Src64B,loco,kst
	GO:0034330	cell junction organization	4.662e-05	-9.97348	0.0016893	63	12	0.0223881	536	10917	3.53433e+59	vari,bou,Gli,kirre,crb,Csk,Atpalpha,sdt,crok,Src64B,loco,kst
	GO:0035152	regulation of tube architecture, open tracheal system	4.76923e-05	-9.95074	0.0017178	73	13	0.0242537	536	10917	3.61254e+64	stan,vari,bou,Gli,DAAM,sano,Atpalpha,crok,Fas2,wus,rho,peb,klar
	GO:0009968	negative regulation of signal transduction	5.25414e-05	-9.85391	0.0018811	228	26	0.0485075	536	10917	3.45823e+129	kek2,hiw,Akap200,Tom,dock,Mmp2,Sulf1,CG42450,sgg,aop,Cbl,Dap160,CG42684,stan,RSG7,tow,aos,crb,spict,rdx,cmpy,Fas2,Apc,sty,loco,peb
	GO:0050804	regulation of synaptic transmission	5.53105e-05	-9.80255	0.0019614	74	13	0.0242537	536	10917	3.59775e+66	brp,comt,brat,CG9935,alpha-Spec,cac,stnB,jeb,Syt4,Ank2,Sap47,CASK,GABA-B-R2
	GO:0045886	negative regulation of synaptic growth at neuromuscular junction	5.60964e-05	-9.78844	0.0019614	37	9	0.016791	536	10917	3.24294e+44	hiw,unc-104,spict,Mob2,sgg,Liprin-gamma,TBPH,Abl,Src64B
	GO:0051964	negative regulation of synapse assembly	5.60964e-05	-9.78844	0.0019614	37	9	0.016791	536	10917	3.24294e+44	hiw,unc-104,spict,Mob2,sgg,Liprin-gamma,TBPH,Abl,Src64B
	GO:0051961	negative regulation of nervous system development	5.60964e-05	-9.78844	0.0019614	37	9	0.016791	536	10917	3.24294e+44	hiw,unc-104,spict,Mob2,sgg,Liprin-gamma,Abl,TBPH,Src64B
	GO:0007420	brain development	5.64778e-05	-9.78166	0.0019633	129	18	0.0335821	536	10917	3.59003e+89	babo,Sema-1a,sim,RhoGAPp190,rho,CG3638,pros,stan,brat,Eph,Sema-5c,tll,Fas2,Apc,neur,robo3,Src64B,ssh
	GO:0008039	synaptic target recognition	6.15469e-05	-9.69571	0.0021271	46	10	0.0186567	536	10917	3.33743e+49	Npc2a,Gli,Sema-1a,Drl-2,Sulf1,dpr12,nrm,tutl,beat-IIIc,CG12004
	GO:0031326	regulation of cellular biosynthetic process	6.70563e-05	-9.60998	0.0023042	950	73	0.136194	536	10917	40370,35184,32429,44786,43422,36401,41423,36064,31248,41612,43234,45278,53579,31883,33608,43656,42110,38963,39999,33239,43087,38961,41363,33916,317817,32724,36544,38620,45816,33607,3885573,39089,39071,43825,39063,33392,41096,38321,43023,35662,42561,39441,35197,32723,38469,42210,5740176,34648,39418,44849,34277,44275,32039,34878,3772396,35168,32846,34280,45976,35402,44936,47285,32152,36555,37886,41…	Aef1,Lim3,hiw,nerfin-1,eIF4E-6,wuc,l(3)neo38,gem,sgg,sim,ro,csw,Dip3,lz,slp2,tll,Hmx,Unr,Eip75B,Pph13,msi,Cbl,pros,eya,CG32006,B-H1,AGO1,blanks,onecut,slp1,Octbeta3R,MTF-1,Hsp67Bc,sv,PGRP-LC,aop,ird1,dos,dan,so,GABA-B-R2,mirr,brat,B-H2,scrt,gl,CG34340,aret,toe,pnr,gcm,SoxN,sev,GABA-B-R1,seq,Side,Bx,gcm2,retn,Mio,Eip93F,repo,wisp,mam,nvy,svp,Atf-2,Mlf,NC2alpha,FoxP,sty,peb,CG18599
	GO:0051171	regulation of nitrogen compound metabolic process	6.85862e-05	-9.58742	0.0023433	1034	78	0.145522	536	10917	40370,41833,35184,32429,44786,36401,41423,36064,31248,41612,43234,42496,45278,42358,53579,31883,33608,43656,42110,38963,39999,33239,41363,33916,317817,32724,36544,38620,45816,31000,33607,3885573,39089,34370,43825,39063,33392,38321,41096,43023,35662,42561,39441,32723,38469,42210,5740176,34648,39418,34633,44849,34277,36554,44275,34431,32039,42848,34878,3772396,35168,32846,34280,45976,35402,44936,47…	Aef1,SIDL,Lim3,hiw,nerfin-1,wuc,l(3)neo38,gem,sgg,sim,ro,RhoGAP93B,csw,Ire1,Dip3,lz,slp2,tll,Hmx,Unr,Eip75B,Pph13,pros,eya,CG32006,B-H1,AGO1,blanks,onecut,elav,slp1,Octbeta3R,MTF-1,Rsf1,sv,PGRP-LC,aop,dos,ird1,dan,so,GABA-B-R2,mirr,B-H2,scrt,gl,CG34340,aret,toe,Ced-12,pnr,gcm,RN-tre,SoxN,CG5337,sev,Rox8,GABA-B-R1,seq,Side,Bx,gcm2,retn,Mio,Eip93F,repo,wisp,mam,nvy,svp,Atf-2,Mlf,NC2alpha,FoxP,sty,p…
	GO:0007613	memory	7.08159e-05	-9.55543	0.0024057	97	15	0.0279851	536	10917	3.59773e+75	brp,Appl,w,klg,Mob2,Tbh,Ank2,Syn,drl,Fas2,tau,CASK,2mit,Src64B,neur
	GO:0060541	respiratory system development	7.16916e-05	-9.54314	0.0024217	219	25	0.0466418	536	10917	3.66094e+126	Oaz,Cad96Cb,CdsA,DAAM,seq,Mmp2,ru,Fhos,csw,wus,rho,klar,stan,vari,bou,Gli,crb,sano,Atpalpha,crok,Fas2,sty,Src64B,peb,Sdc
	GO:0008344	adult locomotory behavior	7.37701e-05	-9.51456	0.0024641	76	13	0.0242537	536	10917	3.59774e+64	brp,dila,hiw,na,cac,Cdk5alpha,Atpalpha,Tbh,sim,DCX-EMAP,tutl,TBPH,CASK
	GO:0042063	gliogenesis	7.37701e-05	-9.51456	0.0024641	76	13	0.0242537	536	10917	3.67035e+64	unc-5,gish,rap,svp,gcm,ths,gcm2,so,sty,retn,loco,pros,repo
	GO:0048859	formation of anatomical boundary	7.47965e-05	-9.50074	0.0024845	47	10	0.0186567	536	10917	3.27233e+49	B-H2,B-H1,unc-5,Tom,ena,lz,phyl,neur,mirr,rho
	GO:0008088	axon cargo transport	8.14474e-05	-9.41555	0.0026905	23	7	0.0130597	536	10917	5.74054e+36	futsch,Aplip1,Kap3,syd,Klp68D,unc-104,Unc-76
	GO:0090066	regulation of anatomical structure size	8.71755e-05	-9.34759	0.0028287	170	21	0.0391791	536	10917	4.35283e+107	Cad99C,DAAM,seq,Sema-1a,ena,RhoGAPp190,Lar,wus,stan,Liprin-alpha,vari,Gli,sano,Atpalpha,CadN,crok,Fas2,Abl,Src64B,ssh,kst
	GO:0042052	rhabdomere development	8.75241e-05	-9.3436	0.0028287	39	9	0.016791	536	10917	3.56804e+44	didum,SP2353,chp,crb,Pph13,Rip11,Mob2,Ire1,Nrk
	GO:0010001	glial cell differentiation	8.75241e-05	-9.3436	0.0028287	39	9	0.016791	536	10917	4.59224e+44	rap,svp,ths,gcm,gcm2,sty,loco,pros,repo
	GO:0040012	regulation of locomotion	8.75241e-05	-9.3436	0.0028287	39	9	0.016791	536	10917	2.49072e+45	Liprin-alpha,unc-104,Sema-1a,ena,Fhos,Tbh,CadN,Lar,CASK
	GO:0080090	regulation of primary metabolic process	8.98685e-05	-9.31716	0.0028888	1281	92	0.171642	536	10917	40370,41833,35900,35184,32429,44786,43422,36401,41423,36064,32551,31248,41612,43234,42496,45278,42358,53579,42896,41704,31883,33608,43656,42110,31245,38963,39999,33239,43087,38961,41363,33916,317817,32724,36544,38620,45816,31000,33607,3885573,39089,34370,39071,43825,33392,38321,35378,43023,35662,39441,42561,35197,32723,38469,34648,42210,5740176,39418,34633,43146,44849,34277,36554,48973,44275,3443…	Aef1,SIDL,babo,Lim3,hiw,nerfin-1,eIF4E-6,wuc,l(3)neo38,gem,CycD,sgg,sim,ro,RhoGAP93B,csw,Ire1,Dip3,crb,rdx,lz,slp2,tll,Hmx,Seipin,Unr,Eip75B,Pph13,msi,Cbl,pros,eya,CG32006,B-H1,AGO1,blanks,onecut,elav,slp1,Octbeta3R,MTF-1,Rsf1,Hsp67Bc,sv,aop,dos,Dap160,dan,so,mirr,GABA-B-R2,brat,B-H2,scrt,aret,gl,CG34340,toe,Ced-12,boss,pnr,gcm,RN-tre,Src64B,SoxN,CG5337,sev,step,Rox8,GABA-B-R1,seq,hbs,Side,Bx,gcm…
	GO:0045597	positive regulation of cell differentiation	9.03912e-05	-9.31136	0.0028901	48	10	0.0186567	536	10917	3.17817e+50	CG32006,sev,aret,gcm,Fhos,slp2,aop,kat-60L1,slp1,Dap160
	GO:0008045	motor neuron axon guidance	0.000100245	-9.20789	0.0031881	58	11	0.0205224	536	10917	3.67034e+54	unc-5,Lim3,Cdk5alpha,Sema-1a,Sulf1,Drl-2,Ptp99A,Abl,Lar,beat-IIIc,Sdc
	GO:0007424	open tracheal system development	0.000105413	-9.15763	0.0033347	211	24	0.0447761	536	10917	3.66094e+121	Oaz,Cad96Cb,CdsA,DAAM,seq,Mmp2,ru,csw,wus,rho,klar,stan,vari,bou,Gli,crb,sano,Atpalpha,crok,Fas2,sty,Src64B,peb,Sdc
	GO:0043297	apical junction assembly	0.000108087	-9.13258	0.0033858	40	9	0.016791	536	10917	3.53433e+44	vari,bou,Gli,crb,Atpalpha,crok,sdt,loco,kst
	GO:0048640	negative regulation of developmental growth	0.000108656	-9.12733	0.0033858	49	10	0.0186567	536	10917	3.24294e+51	hiw,unc-104,seq,spict,Mob2,sgg,Liprin-gamma,Abl,TBPH,Src64B
	GO:0019219	regulation of nucleobase-containing compound metabolic process	0.000108727	-9.12667	0.0033858	998	75	0.139925	536	10917	40370,41833,35184,32429,44786,36401,41423,36064,31248,41612,43234,42496,45278,42358,53579,31883,33608,43656,42110,38963,39999,33239,41363,33916,317817,32724,36544,38620,45816,31000,33607,3885573,39089,34370,43825,33392,38321,43023,35662,42561,39441,32723,38469,42210,5740176,34648,39418,34633,44849,34277,36554,44275,34431,32039,42848,34878,3772396,35168,32846,34280,45976,35402,44936,47285,36555,37…	Aef1,SIDL,Lim3,hiw,nerfin-1,wuc,l(3)neo38,gem,sgg,sim,ro,RhoGAP93B,csw,Ire1,Dip3,lz,slp2,tll,Hmx,Unr,Eip75B,Pph13,pros,eya,CG32006,B-H1,AGO1,blanks,onecut,elav,slp1,Octbeta3R,MTF-1,Rsf1,sv,aop,dos,dan,so,GABA-B-R2,mirr,B-H2,scrt,gl,CG34340,aret,toe,Ced-12,pnr,gcm,RN-tre,SoxN,CG5337,sev,Rox8,GABA-B-R1,seq,Side,Bx,gcm2,retn,Mio,Eip93F,repo,mam,nvy,svp,Atf-2,Mlf,NC2alpha,FoxP,sty,peb,CG18599,plx
	GO:0006468	protein phosphorylation	0.000111229	-9.10392	0.0034458	252	27	0.0503731	536	10917	3.59005e+134	babo,gish,sev,Ror,Pask,Cdk5alpha,Csk,sgg,CaMKI,drl,ird1,CG10082,Nrk,sff,CASK,Ire1,wnd,Gyc32E,CG8485,Eph,CG7156,Drl-2,CG8866,Abl,inaC,Hsp67Bc,Src64B
	GO:0048490	anterograde synaptic vesicle transport	0.000117725	-9.04716	0.0036282	3	3	0.00559701	536	10917	2490725347236870	Liprin-alpha,Aplip1,unc-104
	GO:0007292	female gamete generation	0.000123707	-8.99759	0.0037931	579	49	0.0914179	536	10917	33290,43528,42115,35997,31718,31248,33392,33418,45278,35259,42567,38168,39441,35058,35197,31938,41310,42896,34648,34633,36554,31883,44543,40014,45821,48973,41085,38418,35680,39999,41398,37201,38961,38816,45976,326198,33916,32152,36544,34927,39583,39833,38231,39445,40462,44642,40383,38424,42672	Iris,Cad99C,sll,Mmp2,Tbh,sgg,aop,Rab5,csw,Lar,CASK,rho,mirr,qua,brat,Yp2,Tsp86D,crb,aret,Ced-12,RN-tre,lz,enc,grim,Abl,Src64B,neur,kst,didum,Eip75B,Csk,ena,Cbl,qm,retn,Krn,eya,wisp,AGO1,Gli,bbg,aos,alpha-Spec,Klc,Hem,Apc,M6,sty,loco
	GO:0016310	phosphorylation	0.000126714	-8.97358	0.0038654	382	36	0.0671642	536	10917	3.59003e+182	babo,Ror,Cdk5alpha,sgg,aop,ird1,Nrk,CASK,Ire1,wnd,CG7156,Gadd45,Drl-2,CG8866,Abl,inaC,Src64B,gish,Aplip1,Pi4KIIalpha,sev,Csk,Pask,CaMKI,CG10082,drl,sff,CG34384,Krn,Gyc32E,CG8485,Ipp,Atf-2,Eph,Hsp67Bc,PIP5K59B
	GO:0007169	transmembrane receptor protein tyrosine kinase signaling pathway	0.000149562	-8.8078	0.0045393	115	16	0.0298507	536	10917	3.20393e+80	sev,Ror,dock,ths,ru,Cbl,dos,csw,Nrk,rho,Krn,Eph,boss,tll,sty,peb
	GO:0019222	regulation of metabolic process	0.000157616	-8.75535	0.0047595	1529	105	0.195896	536	10917	40370,41833,35900,35184,32429,44786,43422,36401,41423,36064,32551,31248,41612,43234,42496,45278,42358,38168,53579,42896,41704,39717,31883,33608,43656,42110,31245,38963,53472,39999,33239,43087,38961,41363,33916,317817,32724,36544,38620,45816,31000,33607,33509,3885573,39089,34370,39071,38491,43825,39063,33392,38321,41096,35378,43023,35662,39441,42561,32723,35197,38469,34648,5740176,42210,36295,3941…	Aef1,SIDL,babo,Lim3,hiw,nerfin-1,eIF4E-6,wuc,l(3)neo38,gem,CycD,sgg,sim,ro,RhoGAP93B,csw,Ire1,rho,Dip3,crb,rdx,comm,lz,slp2,tll,Hmx,Seipin,Unr,Aplip1,Eip75B,Pph13,msi,Cbl,pros,eya,CG32006,B-H1,AGO1,blanks,onecut,elav,slp1,CG17265,Octbeta3R,MTF-1,Rsf1,Hsp67Bc,ens,sv,PGRP-LC,aop,dos,ird1,Dap160,dan,so,mirr,GABA-B-R2,B-H2,brat,scrt,aret,CG34340,gl,jeb,toe,Ced-12,boss,pnr,gcm,RN-tre,Abl,Sdc,fw,Src64B…
	GO:0009790	embryo development	0.000161484	-8.7311	0.0048518	523	45	0.0839552	536	10917	31292,31248,33392,37007,33418,38321,45278,35259,35662,38168,39441,32637,35330,42896,36295,37066,34277,44849,33608,31883,43656,45821,48973,35680,32039,35425,31667,37201,44861,38816,34280,45976,39673,36125,317817,33916,36544,36555,41491,48971,33607,44642,38424,43235,31391	kirre,sgg,aop,Sema-1b,Rab5,dos,csw,Lar,so,rho,mirr,mthl1,Cen,crb,jeb,Sema-5c,gcm,pnr,slp2,lz,tll,Abl,Src64B,didum,sev,step,Dok,ena,sdt,qm,gcm2,retn,Z600,stan,CG32006,eya,AGO1,mam,svp,Atpalpha,slp1,Apc,sty,T48,peb
	GO:0051234	establishment of localization	0.000170012	-8.67964	0.0050825	1603	109	0.203358	536	10917	41833,36488,31456,43806,32158,39332,36876,35021,33109,5740544,41861,39461,33418,45278,32926,32619,42567,35698,47091,42896,39717,34681,39836,34268,41025,36897,40580,53472,38504,36005,45338,318874,33739,37201,32986,38651,41426,43905,38961,32683,37536,41363,32290,35620,38067,249072,33845,38218,43442,37810,33247,4379834,34840,43660,35578,44642,37864,33520,38491,33374,318563,39063,32071,42115,36718,40…	SIDL,CG42321,SK,CG9935,cac,Klp68D,unc-104,CG13284,tty,futsch,Sra-1,Ent3,Rab5,csw,out,para,CASK,CG43340,comt,crb,comm,spict,st,Oatp30B,p,inaC,rpk,Aplip1,tipE,CG1688,na,Nnf1b,qtc,ena,CG12531,Cralbp,HisCl1,syd,Cbl,wus,Vps35,pros,Syt12,Tsp42Ej,klar,Liprin-alpha,mtm,drpr,Vha100-1,thoc5,Eaat2,stnB,Rab14,CG12071,CG3409,Apc,tamo,cnir,ens,Npc2a,CG31030,PGRP-LC,Kap3,sll,Khc-73,Syt4,retm,aop,Dap160,qua,Syx1…
	GO:0048477	oogenesis	0.000177554	-8.63624	0.0052816	572	48	0.0895522	536	10917	33290,43528,42115,35997,31248,33392,33418,45278,35259,42567,38168,35058,39441,35197,31938,41310,42896,34648,34633,31883,44543,36554,40014,45821,48973,41085,38418,35680,39999,41398,37201,38961,38816,45976,326198,33916,32152,34927,36544,39833,39583,38231,40462,39445,40383,44642,38424,42672	Iris,Cad99C,sll,Mmp2,sgg,aop,Rab5,csw,Lar,CASK,rho,qua,mirr,brat,Yp2,Tsp86D,crb,aret,Ced-12,lz,enc,RN-tre,grim,Abl,Src64B,neur,kst,didum,Eip75B,Csk,ena,Cbl,qm,retn,Krn,eya,wisp,Gli,AGO1,aos,bbg,alpha-Spec,Hem,Klc,M6,Apc,sty,loco
	GO:0008049	male courtship behavior	0.000217069	-8.4353	0.006425	63	11	0.0205224	536	10917	3.12714e+54	w,tipE,cac,qtc,Tbh,Syn,FoxP,para,CASK,retn,pros
	GO:0006810	transport	0.000224006	-8.40384	0.0065977	1543	105	0.195896	536	10917	41833,36488,31456,43806,32158,39332,36876,35021,33109,5740544,41861,39461,33418,45278,32926,32619,42567,35698,47091,42896,39717,34681,39836,34268,41025,36897,40580,53472,38504,36005,45338,33739,37201,32986,38651,41426,43905,38961,32683,37536,41363,32290,35620,38067,249072,33845,38218,43442,37810,33247,4379834,34840,43660,35578,44642,37864,33520,33374,318563,39063,32071,42115,40876,33899,33392,353…	SIDL,CG42321,SK,CG9935,cac,Klp68D,unc-104,CG13284,tty,futsch,Sra-1,Ent3,Rab5,csw,out,para,CASK,CG43340,comt,crb,comm,spict,st,Oatp30B,p,inaC,rpk,Aplip1,tipE,CG1688,na,qtc,ena,CG12531,Cralbp,HisCl1,syd,Cbl,wus,Vps35,pros,Syt12,Tsp42Ej,klar,Liprin-alpha,mtm,drpr,Vha100-1,thoc5,Eaat2,stnB,Rab14,CG12071,CG3409,Apc,tamo,cnir,Npc2a,CG31030,PGRP-LC,Kap3,sll,Syt4,retm,aop,Dap160,qua,Syx13,Unc-76,Syt14,br…
	GO:0048569	post-embryonic organ development	0.000243263	-8.32137	0.0071297	486	42	0.0783582	536	10917	3.59003e+209	babo,kirre,Mmp2,l(3)neo38,sgg,Rab5,so,rho,mirr,qua,CG43340,mthl1,CG42674,B-H2,rap,tmod,aret,gcm,spict,lz,Fas2,fw,neur,boi,CG15312,step,Dok,ths,Fhos,CG11382,Cbl,Bx,CG42684,CG14478,klar,eya,B-H1,Glut4EF,tow,Gli,aos,mam
	GO:0045314	regulation of compound eye photoreceptor development	0.000259372	-8.25725	0.0075648	13	5	0.00932836	536	10917	3.33925e+24	aop,csw,Dip3,sty,neur
	GO:0010604	positive regulation of macromolecule metabolic process	0.000270304	-8.21596	0.0078454	382	35	0.0652985	536	10917	4.38254e+176	sv,babo,sgg,sim,ro,Dap160,so,mirr,Dip3,gl,pnr,comm,gcm,lz,slp2,tll,Src64B,SoxN,step,Pph13,Bx,retn,pros,repo,Krn,Eip93F,CG32006,eya,onecut,mam,Atf-2,7B2,NC2alpha,slp1,MTF-1
	GO:0009792	embryo development ending in birth or egg hatching	0.00028877	-8.14988	0.0083408	185	21	0.0391791	536	10917	3.12924e+105	kirre,step,Dok,ena,aop,Sema-1b,Rab5,Lar,mirr,CG32006,crb,svp,Atpalpha,Sema-5c,pnr,slp2,Abl,slp1,Apc,Src64B,peb
	GO:1902692	regulation of neuroblast proliferation	0.000292452	-8.13721	0.0084066	20	6	0.011194	536	10917	3.17817e+30	CG32006,brat,slp2,slp1,Dap160,pros
	GO:0010721	negative regulation of cell development	0.000317558	-8.05485	0.0089985	28	7	0.0130597	536	10917	3.33924e+36	aop,brat,CadN,Dip3,aos,pros,seq
	GO:0007157	heterophilic cell-cell adhesion	0.000317558	-8.05485	0.0089985	28	7	0.0130597	536	10917	4.25714e+34	glec,hbs,beat-VII,kirre,beat-IIIb,beat-IIIc,beat-IIIa
	GO:0016318	ommatidial rotation	0.000317558	-8.05485	0.0089985	28	7	0.0130597	536	10917	3.61254e+35	stan,CadN,gish,aos,sty,peb,Krn
	GO:1902803	regulation of synaptic vesicle transport	0.000343382	-7.97667	0.0095938	8	4	0.00746269	536	10917	3.51974e+21	brat,stnB,CASK,GABA-B-R2
	GO:2000331	regulation of terminal button organization	0.000343382	-7.97667	0.0095938	8	4	0.00746269	536	10917	4.01435e+19	wnd,Aplip1,hiw,CASK
	GO:0018108	peptidyl-tyrosine phosphorylation	0.000343382	-7.97667	0.0095938	8	4	0.00746269	536	10917	4.58213e+19	Abl,sev,Src64B,Csk
FDR_BH p<0.01	GO:0007281	germ cell development	0.000345318	-7.97104	0.0096031	669	53	0.0988806	536	10917	33290,43528,32071,42115,35997,31248,33392,33418,32926,45278,35259,42567,38168,35058,39441,35197,31938,42896,41310,34648,34633,44543,36554,31883,40014,45821,48973,41085,38418,35680,49701,39999,43087,41398,37201,38961,38816,45976,326198,33916,32152,34927,36544,38620,39833,39583,38231,40462,39445,40383,44642,38424,42672	Iris,Cad99C,Kap3,sll,Mmp2,sgg,aop,Rab5,out,csw,Lar,CASK,rho,qua,mirr,brat,Yp2,crb,Tsp86D,aret,Ced-12,enc,RN-tre,lz,grim,Abl,Src64B,neur,kst,didum,gish,Eip75B,msi,Csk,ena,Cbl,qm,retn,Krn,eya,wisp,Gli,AGO1,blanks,aos,bbg,alpha-Spec,Hem,Klc,M6,Apc,sty,loco
	GO:0048585	negative regulation of response to stimulus	0.000366628	-7.91116	0.010148	271	27	0.0503731	536	10917	3.45823e+134	kek2,hiw,Akap200,Tom,dock,Mmp2,Sulf1,CG42450,sgg,aop,Cbl,Dap160,CG42684,stan,RSG7,tow,SP2353,aos,crb,spict,rdx,cmpy,Fas2,Apc,sty,loco,peb
	GO:0042478	regulation of eye photoreceptor cell development	0.000387259	-7.85642	0.01067	14	5	0.00932836	536	10917	3.33925e+24	aop,csw,Dip3,sty,neur
	GO:2000177	regulation of neural precursor cell proliferation	0.000392594	-7.84273	0.010768	21	6	0.011194	536	10917	3.17817e+30	CG32006,brat,slp2,slp1,Dap160,pros
	GO:0009791	post-embryonic development	0.000413191	-7.7916	0.011281	674	53	0.0988806	536	10917	33374,35900,34170,31292,35997,41423,31248,33418,35662,39696,38168,35058,35698,39441,32637,32723,40205,45922,43633,34648,32420,34277,34681,31883,40014,31364,32423,41085,32162,31229,31940,35425,31667,36258,39004,31069,32846,38961,32754,36964,44936,38067,33916,32724,38218,41217,38755,34927,39833,36555,38231,32422,44642	Npc2a,babo,Akap200,kirre,Mmp2,l(3)neo38,sgg,Rab5,so,comm3,rho,qua,CG43340,mirr,mthl1,B-H2,CG42674,rap,tmod,aret,CG9509,gcm,spict,lz,grim,Fas2,Eo,neur,fw,boi,CG15312,step,Dok,ths,Fhos,CG11382,Bx,Cbl,CG42684,CG14478,Eip93F,klar,eya,B-H1,drpr,Glut4EF,tow,Gli,aos,mam,alpha-Spec,CG12398,Apc
	GO:0051252	regulation of RNA metabolic process	0.000422649	-7.76897	0.011486	890	66	0.123134	536	10917	40370,35184,32429,44786,36401,41423,36064,31248,41612,43234,45278,42358,53579,31883,33608,43656,42110,38963,39999,33239,41363,33916,317817,32724,36544,38620,45816,31000,33607,39089,34370,43825,33392,38321,43023,35662,39441,32723,38469,42210,5740176,34648,39418,44849,34277,44275,32039,42848,3772396,32846,35168,34280,45976,44936,47285,35402,36555,37886,41491,37978,36750,37471,41182,38424,31391,42191	Aef1,Lim3,hiw,nerfin-1,wuc,l(3)neo38,gem,sgg,sim,ro,csw,Ire1,Dip3,lz,slp2,tll,Hmx,Unr,Eip75B,Pph13,pros,eya,CG32006,B-H1,AGO1,blanks,onecut,elav,slp1,MTF-1,Rsf1,sv,aop,dos,dan,so,mirr,B-H2,scrt,gl,CG34340,aret,toe,pnr,gcm,SoxN,sev,Rox8,seq,Bx,Side,gcm2,retn,Eip93F,repo,Mio,mam,nvy,svp,Atf-2,Mlf,NC2alpha,FoxP,sty,peb,CG18599
	GO:0009893	positive regulation of metabolic process	0.000435359	-7.73934	0.011778	484	41	0.0764925	536	10917	4.38254e+208	sv,babo,PGRP-LC,sgg,sim,ro,ird1,Dap160,so,mirr,Dip3,crb,gl,jeb,rdx,gcm,comm,pnr,lz,slp2,tll,Src64B,SoxN,Pph13,step,Bx,retn,pros,Krn,repo,Eip93F,CG32006,eya,onecut,mam,Atf-2,7B2,NC2alpha,slp1,Octbeta3R,MTF-1
	GO:0030855	epithelial cell differentiation	0.000438282	-7.73265	0.011804	347	32	0.0597015	536	10917	4.35283e+160	Cad99C,sgg,aop,Rab5,csw,CASK,rho,qua,mirr,Tsp86D,crb,Ced-12,RN-tre,Abl,Src64B,neur,fw,kst,ena,hbs,Cbl,Krn,eya,Gli,tow,bbg,aos,alpha-Spec,Klc,sty,peb,loco
	GO:0007018	microtubule-based movement	0.000442334	-7.72345	0.01186	114	15	0.0279851	536	10917	3.60104e+76	dila,didum,Aplip1,Kap3,CG14535,Klp68D,unc-104,CG14763,Khc-73,futsch,Klc,CG9279,syd,Unc-76,klar
	GO:0035165	embryonic crystal cell differentiation	0.000453653	-7.69818	0.012002	4	3	0.00559701	536	10917	342773188334280	gcm,lz,gcm2
	GO:0048841	regulation of axon extension involved in axon guidance	0.000453653	-7.69818	0.012002	4	3	0.00559701	536	10917	2490723507035250	Liprin-alpha,CadN,Lar
	GO:0035163	embryonic hemocyte differentiation	0.000453653	-7.69818	0.012002	4	3	0.00559701	536	10917	342773188334280	gcm,lz,gcm2
	GO:0007167	enzyme linked receptor protein signaling pathway	0.000463022	-7.67774	0.012142	165	19	0.0354478	536	10917	3.59003e+95	babo,hiw,sev,Ror,dock,ths,ru,Cbl,dos,csw,Nrk,rho,Krn,Eph,boss,pnr,tll,sty,peb
	GO:0042058	regulation of epidermal growth factor receptor signaling pathway	0.000467086	-7.669	0.012142	48	9	0.016791	536	10917	3.45824e+47	kek2,aos,Sulf1,Fas2,Cbl,rho-5,sty,rho,Krn
	GO:0048645	organ formation	0.000467086	-7.669	0.012142	48	9	0.016791	536	10917	3.27233e+44	B-H2,B-H1,unc-5,Tom,lz,slp1,phyl,neur,rho
	GO:1901184	regulation of ERBB signaling pathway	0.000467086	-7.669	0.012142	48	9	0.016791	536	10917	3.45824e+47	kek2,aos,Sulf1,Fas2,Cbl,rho-5,sty,rho,Krn
	GO:0009416	response to light stimulus	0.000473538	-7.65528	0.012257	127	16	0.0298507	536	10917	3.59004e+79	babo,CdsA,cac,rdgC,Tsp42Ej,Ace,eya,Vha100-1,svp,gl,CG11426,betaTub60D,Syn,M6,inaC,Sdc
	GO:0060627	regulation of vesicle-mediated transport	0.000492634	-7.61574	0.012696	69	11	0.0205224	536	10917	4.70914e+56	comt,brat,gish,step,stnB,Syt4,comm,Rab5,CASK,corn,GABA-B-R2
	GO:0000122	negative regulation of transcription from RNA polymerase II promoter	0.000500381	-7.60014	0.01284	153	18	0.0335821	536	10917	4.03704e+92	Aef1,wuc,seq,aop,Side,retn,mirr,pros,CG32006,B-H1,B-H2,scrt,toe,pnr,slp2,lz,NC2alpha,slp1
	GO:0010160	formation of organ boundary	0.000511161	-7.57883	0.013045	39	8	0.0149254	536	10917	3.27233e+39	B-H2,B-H1,unc-5,Tom,lz,phyl,neur,rho
	GO:0045944	positive regulation of transcription from RNA polymerase II promoter	0.000512714	-7.57579	0.013045	193	21	0.0391791	536	10917	4.38254e+105	sv,sim,ro,so,Eip93F,CG32006,eya,onecut,Dip3,mam,gl,Atf-2,pnr,gcm,slp2,lz,NC2alpha,tll,slp1,MTF-1,SoxN
	GO:0043954	cellular component maintenance	0.000517638	-7.56623	0.013114	22	6	0.011194	536	10917	3.59774e+29	brp,RhoGAP100F,alpha-Spec,crb,Atf-2,Csk
	GO:0007444	imaginal disc development	0.000544607	-7.51545	0.013739	633	50	0.0932836	536	10917	35900,43528,35997,41423,31248,41612,33418,45278,35662,38168,39441,35058,35698,32637,40205,32723,40046,53579,45922,43633,34648,34681,31883,31364,32162,41085,31940,31229,35425,31667,44856,39004,31069,38961,44355,32846,32754,36964,35077,33916,32724,38218,41217,38755,34927,39583,39833,36555,44642,31391	babo,Cad99C,Mmp2,l(3)neo38,sgg,sim,Rab5,csw,so,rho,mirr,qua,CG43340,mthl1,CG42674,B-H2,CG14073,Dip3,rap,tmod,aret,spict,lz,Fas2,fw,neur,CG15312,boi,step,Dok,ru,Fhos,CG11382,Cbl,drl,Bx,CG42684,CG14478,rdo,eya,B-H1,drpr,Glut4EF,tow,Gli,bbg,aos,mam,Apc,peb
	GO:0006897	endocytosis	0.000554452	-7.49753	0.013929	322	30	0.0559701	536	10917	3.90634e+151	PGRP-LC,unc-104,CG13284,Sra-1,aop,Rab5,Bx,csw,Cbl,Dap160,wus,Vps35,pros,CG3638,Unc-76,Tsp42Ej,Eip93F,comt,drpr,CG34127,brat,g,stnB,Rab14,Ced-12,Hem,CG12071,comm,inaC,kst
	GO:0060179	male mating behavior	0.000559149	-7.48909	0.013988	70	11	0.0205224	536	10917	3.12714e+54	w,tipE,cac,qtc,Tbh,Syn,FoxP,para,CASK,retn,pros
	GO:0006355	regulation of transcription, DNA-templated	0.000575383	-7.46047	0.014209	816	61	0.113806	536	10917	40370,43825,35184,32429,44786,36401,41423,36064,31248,33392,41612,43234,38321,45278,43023,35662,39441,32723,53579,38469,5740176,42210,39418,34277,44849,31883,33608,43656,42110,44275,38963,32039,39999,33239,3772396,35168,32846,34280,45976,41363,35402,47285,44936,317817,33916,32724,36544,38620,45816,37886,36555,41491,37978,36750,41182,37471,33607,39089,38424,42191,31391	Aef1,sv,Lim3,hiw,nerfin-1,wuc,l(3)neo38,gem,sgg,aop,sim,ro,dos,csw,dan,so,mirr,B-H2,Dip3,scrt,CG34340,gl,toe,gcm,pnr,lz,slp2,tll,Hmx,SoxN,Unr,sev,Eip75B,Pph13,seq,Side,Bx,gcm2,retn,pros,Mio,repo,Eip93F,CG32006,eya,B-H1,AGO1,blanks,onecut,nvy,mam,svp,Atf-2,Mlf,FoxP,NC2alpha,slp1,MTF-1,sty,CG18599,peb
	GO:2001141	regulation of RNA biosynthetic process	0.000575383	-7.46047	0.014209	816	61	0.113806	536	10917	40370,43825,35184,32429,44786,36401,41423,36064,31248,33392,41612,43234,38321,45278,43023,35662,39441,32723,53579,38469,5740176,42210,39418,34277,44849,31883,33608,43656,42110,44275,38963,32039,39999,33239,3772396,35168,32846,34280,45976,41363,35402,47285,44936,317817,33916,32724,36544,38620,45816,37886,36555,41491,37978,36750,41182,37471,33607,39089,38424,42191,31391	Aef1,sv,Lim3,hiw,nerfin-1,wuc,l(3)neo38,gem,sgg,aop,sim,ro,dos,csw,dan,so,mirr,B-H2,Dip3,scrt,CG34340,gl,toe,gcm,pnr,lz,slp2,tll,Hmx,SoxN,Unr,sev,Eip75B,Pph13,seq,Side,Bx,gcm2,retn,pros,Mio,repo,Eip93F,CG32006,eya,B-H1,AGO1,blanks,onecut,nvy,mam,svp,Atf-2,Mlf,FoxP,NC2alpha,slp1,MTF-1,sty,CG18599,peb
	GO:0010628	positive regulation of gene expression	0.000579184	-7.45389	0.014209	279	27	0.0503731	536	10917	4.38253e+135	sv,Pph13,sim,ro,Bx,so,retn,mirr,pros,Eip93F,repo,CG32006,eya,onecut,Dip3,mam,gl,Atf-2,pnr,gcm,slp2,lz,tll,NC2alpha,slp1,MTF-1,SoxN
	GO:0001505	regulation of neurotransmitter levels	0.000585353	-7.44329	0.014209	117	15	0.0279851	536	10917	3.59775e+76	brp,comt,cac,stnB,Syt4,Caps,Tbh,Syn,Dap160,CASK,Syx13,Syt12,Ace,CanB,Syt14
	GO:0010556	regulation of macromolecule biosynthetic process	0.000589875	-7.4356	0.014209	901	66	0.123134	536	10917	40370,35184,32429,44786,43422,36401,41423,36064,31248,41612,43234,45278,53579,31883,33608,43656,42110,38963,39999,33239,43087,41363,33916,317817,32724,36544,38620,45816,33607,39089,39071,43825,33392,38321,43023,35662,39441,35197,32723,38469,42210,5740176,34648,39418,44849,34277,44275,32039,3772396,32846,35168,34280,45976,44936,47285,35402,36555,37886,41491,37978,36750,37471,41182,38424,31391,42191	Aef1,Lim3,hiw,nerfin-1,eIF4E-6,wuc,l(3)neo38,gem,sgg,sim,ro,csw,Dip3,lz,slp2,tll,Hmx,Unr,Eip75B,Pph13,msi,pros,eya,CG32006,B-H1,AGO1,blanks,onecut,slp1,MTF-1,Hsp67Bc,sv,aop,dos,dan,so,mirr,brat,B-H2,scrt,gl,CG34340,aret,toe,pnr,gcm,SoxN,sev,seq,Bx,Side,gcm2,retn,Eip93F,repo,Mio,mam,nvy,svp,Atf-2,Mlf,NC2alpha,FoxP,sty,peb,CG18599
	GO:2000112	regulation of cellular macromolecule biosynthetic process	0.000589875	-7.4356	0.014209	901	66	0.123134	536	10917	40370,35184,32429,44786,43422,36401,41423,36064,31248,41612,43234,45278,53579,31883,33608,43656,42110,38963,39999,33239,43087,41363,33916,317817,32724,36544,38620,45816,33607,39089,39071,43825,33392,38321,43023,35662,39441,35197,32723,38469,42210,5740176,34648,39418,44849,34277,44275,32039,3772396,32846,35168,34280,45976,44936,47285,35402,36555,37886,41491,37978,36750,37471,41182,38424,31391,42191	Aef1,Lim3,hiw,nerfin-1,eIF4E-6,wuc,l(3)neo38,gem,sgg,sim,ro,csw,Dip3,lz,slp2,tll,Hmx,Unr,Eip75B,Pph13,msi,pros,eya,CG32006,B-H1,AGO1,blanks,onecut,slp1,MTF-1,Hsp67Bc,sv,aop,dos,dan,so,mirr,brat,B-H2,scrt,gl,CG34340,aret,toe,pnr,gcm,SoxN,sev,seq,Bx,Side,gcm2,retn,Eip93F,repo,Mio,mam,nvy,svp,Atf-2,Mlf,NC2alpha,FoxP,sty,peb,CG18599
	GO:0009628	response to abiotic stimulus	0.000590246	-7.43497	0.014209	353	32	0.0597015	536	10917	3.59005e+161	babo,gish,CdsA,w,tipE,cac,msi,rdgC,HisCl1,tutl,para,shep,Tsp42Ej,CG3857,Ace,Eip93F,eya,Vha100-1,svp,gl,Atf-2,Atpalpha,CG11426,grim,Syn,CG32100,betaTub60D,inaC,M6,loco,Sdc,Hsp67Bc
	GO:0001746	Bolwig's organ morphogenesis	0.00059414	-7.4284	0.014209	9	4	0.00746269	536	10917	3.39164e+19	eya,tll,Fas2,so
	GO:0055034	Bolwig's organ development	0.00059414	-7.4284	0.014209	9	4	0.00746269	536	10917	3.39164e+19	eya,tll,Fas2,so
	GO:0030516	regulation of axon extension	0.00059414	-7.4284	0.014209	9	4	0.00746269	536	10917	2.49072e+22	Liprin-alpha,CadN,Lar,seq
	GO:0061387	regulation of extent of cell growth	0.00059414	-7.4284	0.014209	9	4	0.00746269	536	10917	2.49072e+22	Liprin-alpha,CadN,Lar,seq
	GO:0048609	multicellular organismal reproductive process	0.000644801	-7.34657	0.01536	904	66	0.123134	536	10917	32158,35997,31718,31248,33418,32926,45278,32619,42567,38168,40143,31938,41310,42896,44543,31883,49701,39999,38504,43087,41398,33739,37201,38961,38816,41363,33916,36544,38620,34927,39445,44642,40126,43528,33290,32071,42115,33392,35259,35662,35058,39441,35197,34648,34633,36554,41247,40014,45821,41085,48973,38418,35680,36010,31271,45976,326198,32152,39833,39583,38231,40462,41182,40383,38424,42672	cac,Mmp2,Tbh,sgg,Rab5,out,csw,para,CASK,rho,wnd,Yp2,Tsp86D,crb,enc,lz,gish,Eip75B,tipE,msi,Csk,qtc,ena,Cbl,qm,pros,eya,AGO1,blanks,Gli,Klc,Apc,Rcd7,Cad99C,Iris,Kap3,sll,aop,Lar,so,qua,mirr,brat,aret,Ced-12,RN-tre,Syn,grim,Abl,neur,Src64B,kst,didum,dila,w,retn,Krn,wisp,aos,bbg,alpha-Spec,Hem,FoxP,M6,sty,loco
	GO:0045926	negative regulation of growth	0.000692556	-7.27512	0.016432	83	12	0.0223881	536	10917	3.24294e+61	hiw,crb,unc-104,Csk,seq,spict,Mob2,sgg,TBPH,Liprin-gamma,Abl,Src64B
	GO:0044765	single-organism transport	0.000718821	-7.2379	0.016987	1360	92	0.171642	536	10917	41833,36488,31456,43806,32158,39332,36876,35021,33109,5740544,41861,39461,33418,45278,32926,32619,42567,47091,42896,39717,34681,39836,34268,41025,36897,40580,53472,38504,36005,45338,33739,37201,32986,41426,43905,32683,37536,41363,32290,38067,249072,33845,38218,43442,33247,4379834,34840,43660,35578,33374,318563,39063,32071,42115,40876,35378,35058,39485,31179,40544,35977,40912,35197,42988,44819,368…	SIDL,CG42321,SK,CG9935,cac,Klp68D,unc-104,CG13284,tty,futsch,Sra-1,Ent3,Rab5,csw,out,para,CASK,comt,crb,comm,spict,st,Oatp30B,p,inaC,rpk,Aplip1,tipE,CG1688,na,qtc,ena,CG12531,HisCl1,syd,wus,Vps35,pros,Syt12,klar,Liprin-alpha,mtm,drpr,Vha100-1,Eaat2,stnB,Rab14,CG12071,CG3409,Npc2a,CG31030,PGRP-LC,Kap3,sll,Syt4,Dap160,qua,Syx13,Unc-76,Syt14,brp,CG34127,brat,CG13646,g,DAT,VhaM9.7-a,Ced-12,Syn,CG9317…
	GO:0016337	single organismal cell-cell adhesion	0.000728144	-7.22501	0.01714	41	8	0.0149254	536	10917	4.30334e+39	Cad96Cb,Cad99C,Fas1,alpha-Spec,CadN,Apc,Src64B,rho
	GO:0010720	positive regulation of cell development	0.000761077	-7.18078	0.017845	32	7	0.0130597	536	10917	3.42773e+35	gcm,CG32006,slp2,Fhos,slp1,kat-60L1,Dap160
	GO:0042675	compound eye cone cell differentiation	0.000778526	-7.15811	0.018183	16	5	0.00932836	536	10917	4.48563e+24	ru,lz,sv,sdk,pros
	GO:0016050	vesicle organization	0.000801479	-7.12905	0.018646	62	10	0.0186567	536	10917	4.70913e+51	comt,B-H2,B-H1,g,Pi4KIIalpha,stnB,unc-104,Rab5,Syx13,ltd
	GO:0035159	regulation of tube length, open tracheal system	0.000858732	-7.06005	0.019864	24	6	0.011194	536	10917	3.61254e+29	stan,vari,Fas2,wus,sano,Atpalpha
	GO:0098602	single organism cell adhesion	0.000861481	-7.05686	0.019864	42	8	0.0149254	536	10917	4.30334e+39	Cad96Cb,Cad99C,Fas1,alpha-Spec,CadN,Apc,Src64B,rho
	GO:0001709	cell fate determination	0.000863918	-7.05403	0.019864	147	17	0.0317164	536	10917	3.96194e+84	Tom,msi,aop,phyl,rho,pros,brat,AGO1,alpha-Spec,mam,svp,pnr,gcm,lz,enc,peb,neur
	GO:0051094	positive regulation of developmental process	0.000867098	-7.05036	0.019864	109	14	0.0261194	536	10917	3.17817e+70	CG32006,sev,cac,aret,gcm,Ank2,aop,Fhos,slp2,lz,kat-60L1,slp1,Dap160,Sdc
	GO:0035214	eye-antennal disc development	0.000911745	-7.00015	0.020807	63	10	0.0186567	536	10917	3.39163e+49	eya,B-H1,babo,B-H2,Dip3,aos,rap,lz,so,rdo
	GO:0051124	synaptic growth at neuromuscular junction	0.00092571	-6.98495	0.02098	33	7	0.0130597	536	10917	2.49072e+35	Liprin-alpha,sgg,Dap160,Lar,jeb,Atpalpha,repo
	GO:0031325	positive regulation of cellular metabolic process	0.000926354	-6.98425	0.02098	471	39	0.0727612	536	10917	4.38254e+198	sv,babo,PGRP-LC,sgg,sim,ro,ird1,Dap160,so,mirr,Dip3,crb,gl,jeb,rdx,gcm,pnr,comm,lz,slp2,tll,Src64B,SoxN,Pph13,step,Bx,retn,Krn,Eip93F,CG32006,eya,onecut,mam,Atf-2,7B2,NC2alpha,slp1,Octbeta3R,MTF-1
	GO:1902667	regulation of axon guidance	0.000951933	-6.95702	0.021397	10	4	0.00746269	536	10917	2.49072e+20	Liprin-alpha,CadN,Lar,Sema-1a
	GO:0018212	peptidyl-tyrosine modification	0.000951933	-6.95702	0.021397	10	4	0.00746269	536	10917	4.58213e+19	Abl,sev,Src64B,Csk
	GO:0016477	cell migration	0.00097113	-6.93705	0.021747	245	24	0.0447761	536	10917	4.97014e+120	gish,ths,ru,ena,aop,Fhos,Rab5,Cbl,csw,qm,so,CASK,Krn,eya,unc-5,Gli,bbg,Tsp86D,rap,Ced-12,Hem,RN-tre,Abl,Sdc
	GO:0051705	multi-organism behavior	0.00102591	-6.88217	0.022888	176	19	0.0354478	536	10917	3.12715e+94	w,na,tipE,cac,qtc,Spn,Tbh,Bx,CG42684,para,CG14478,CASK,retn,pros,CG3638,aret,Syn,FoxP,neur
	GO:0019953	sexual reproduction	0.001082	-6.82894	0.023844	922	66	0.123134	536	10917	32158,35997,31718,31248,33418,32926,45278,32619,42567,38168,40143,31938,41310,42896,44543,31883,49701,39999,38504,43087,41398,33739,37201,38961,38816,41363,33916,36544,38620,34927,39445,44642,40126,43528,33290,32071,42115,33392,35259,35662,35058,39441,35197,34648,34633,36554,41247,40014,45821,41085,48973,38418,35680,36010,31271,45976,326198,32152,39833,39583,38231,40462,41182,40383,38424,42672	cac,Mmp2,Tbh,sgg,Rab5,out,csw,para,CASK,rho,wnd,Yp2,Tsp86D,crb,enc,lz,gish,Eip75B,tipE,msi,Csk,qtc,ena,Cbl,qm,pros,eya,AGO1,blanks,Gli,Klc,Apc,Rcd7,Cad99C,Iris,Kap3,sll,aop,Lar,so,qua,mirr,brat,aret,Ced-12,RN-tre,Syn,grim,Abl,neur,Src64B,kst,didum,dila,w,retn,Krn,wisp,aos,bbg,alpha-Spec,Hem,FoxP,M6,sty,loco
	GO:0008052	sensory organ boundary specification	0.00108362	-6.82745	0.023844	25	6	0.011194	536	10917	3.27233e+29	B-H2,B-H1,lz,Tom,phyl,neur
	GO:0035270	endocrine system development	0.00109269	-6.81911	0.023844	5	3	0.00559701	536	10917	436563566242210	tll,so,gl
	GO:0035271	ring gland development	0.00109269	-6.81911	0.023844	5	3	0.00559701	536	10917	436563566242210	tll,so,gl
	GO:1900242	regulation of synaptic vesicle endocytosis	0.00109269	-6.81911	0.023844	5	3	0.00559701	536	10917	3.51974e+16	brat,stnB,CASK
	GO:0006856	eye pigment precursor transport	0.00109269	-6.81911	0.023844	5	3	0.00559701	536	10917	398363127135940	st,w,ltd
	GO:0060255	regulation of macromolecule metabolic process	0.00109701	-6.81517	0.023851	1289	87	0.162313	536	10917	40370,35900,35184,32429,44786,43422,36401,41423,36064,32551,31248,41612,43234,45278,42358,38168,53579,42896,41704,39717,31883,33608,43656,42110,38963,39999,33239,43087,38961,41363,33916,317817,32724,36544,38620,45816,31000,33607,33509,39089,34370,39071,43825,33392,38321,35378,43023,35662,39441,35197,32723,38469,34648,42210,5740176,39418,43146,44849,34277,45821,32162,48973,44275,32039,35425,42848,…	Aef1,babo,Lim3,hiw,nerfin-1,eIF4E-6,wuc,l(3)neo38,gem,CycD,sgg,sim,ro,csw,Ire1,rho,Dip3,crb,rdx,comm,lz,slp2,tll,Hmx,Unr,Eip75B,Pph13,msi,Cbl,pros,eya,CG32006,B-H1,AGO1,blanks,onecut,elav,slp1,CG17265,MTF-1,Rsf1,Hsp67Bc,sv,aop,dos,Dap160,dan,so,mirr,brat,B-H2,scrt,aret,gl,CG34340,toe,boss,pnr,gcm,Abl,fw,Src64B,SoxN,sev,step,Rox8,seq,hbs,Side,Bx,gcm2,retn,Mio,repo,Krn,Eip93F,nvy,mam,svp,Atf-2,Mlf,…
	GO:0051704	multi-organism process	0.00119129	-6.73272	0.025807	1204	82	0.152985	536	10917	32158,35997,31718,31248,33418,45278,32926,32619,42567,38168,40143,31938,41310,42896,31883,44543,49701,39999,38504,45338,43087,41398,33739,37201,38961,32754,38816,36964,41363,33916,38218,36544,38620,34927,246456,34840,39445,37099,44642,40126,33374,33290,43528,39063,32071,42115,46194,33392,38321,35259,35662,39441,35058,38185,35197,34648,34633,36554,41247,40014,45821,41085,48973,38418,36010,35680,31…	cac,Mmp2,Tbh,sgg,Rab5,csw,out,para,CASK,rho,wnd,Yp2,Tsp86D,crb,lz,enc,gish,Eip75B,tipE,na,msi,Csk,qtc,ena,Cbl,CG42684,qm,CG14478,pros,eya,drpr,AGO1,blanks,Gli,CG30098,Rab14,Klc,IM23,Apc,Rcd7,Npc2a,Iris,Cad99C,PGRP-LC,Kap3,sll,Spn,aop,dos,Lar,so,mirr,qua,CG12004,brat,aret,Ced-12,RN-tre,Syn,grim,Abl,neur,Src64B,kst,dila,didum,w,Bx,retn,CG3638,Krn,wisp,aos,SP2353,bbg,alpha-Spec,Hem,LysX,FoxP,M6,sty,…
	GO:0007619	courtship behavior	0.0012668	-6.67126	0.027245	77	11	0.0205224	536	10917	3.12714e+54	w,tipE,cac,qtc,Tbh,Syn,FoxP,para,CASK,retn,pros
	GO:0001708	cell fate specification	0.0012668	-6.67126	0.027245	77	11	0.0205224	536	10917	3.17817e+57	CG32006,sev,Tom,jeb,seq,slp2,tll,ro,slp1,rho,pros
	GO:0044703	multi-organism reproductive process	0.00127784	-6.66258	0.027384	928	66	0.123134	536	10917	32158,35997,31718,31248,33418,32926,45278,32619,42567,38168,40143,31938,41310,42896,44543,31883,49701,39999,38504,43087,41398,33739,37201,38961,38816,41363,33916,36544,38620,34927,39445,44642,40126,43528,33290,32071,42115,33392,35259,35662,35058,39441,35197,34648,34633,36554,41247,40014,45821,41085,48973,38418,35680,36010,31271,45976,326198,32152,39833,39583,38231,40462,41182,40383,38424,42672	cac,Mmp2,Tbh,sgg,Rab5,out,csw,para,CASK,rho,wnd,Yp2,Tsp86D,crb,enc,lz,gish,Eip75B,tipE,msi,Csk,qtc,ena,Cbl,qm,pros,eya,AGO1,blanks,Gli,Klc,Apc,Rcd7,Cad99C,Iris,Kap3,sll,aop,Lar,so,qua,mirr,brat,aret,Ced-12,RN-tre,Syn,grim,Abl,neur,Src64B,kst,didum,dila,w,retn,Krn,wisp,aos,bbg,alpha-Spec,Hem,FoxP,M6,sty,loco
	GO:0051674	localization of cell	0.00131474	-6.63412	0.028074	265	25	0.0466418	536	10917	4.97014e+125	gish,ths,ena,ru,aop,Fhos,Rab5,csw,Cbl,qm,so,CASK,Krn,eya,unc-5,Gli,bbg,rap,Tsp86D,Ced-12,Hem,RN-tre,Abl,Apc,Sdc
	GO:0061061	muscle structure development	0.00134077	-6.61451	0.028528	222	22	0.0410448	536	10917	3.80824e+111	ebd1,sv,DAAM,kirre,dock,rst,ths,hbs,aop,drl,retn,klar,eya,nvy,CG34340,jeb,Hem,Ced-12,wech,Scgbeta,sty,ens
	GO:0072091	regulation of stem cell proliferation	0.00135106	-6.60687	0.028645	26	6	0.011194	536	10917	3.17817e+30	CG32006,brat,slp2,slp1,Dap160,pros
	GO:0035151	regulation of tube size, open tracheal system	0.00138248	-6.58388	0.029208	45	8	0.0149254	536	10917	3.61254e+39	stan,vari,Gli,crok,Fas2,wus,sano,Atpalpha
	GO:0046578	regulation of Ras protein signal transduction	0.0014031	-6.56907	0.029422	167	18	0.0335821	536	10917	4.18334e+89	SIDL,CG5522,CG5337,MESK2,Akap200,CG7852,step,aop,dos,RhoGAP93B,CG42684,CG9098,CG42674,CG5937,Ced-12,RN-tre,sty,plx
	GO:0031987	locomotion involved in locomotory behavior	0.00140739	-6.56602	0.029422	18	5	0.00932836	536	10917	3.70665e+24	Sema-5c,kermit,neur,ens,Sema-1a
	GO:0008594	photoreceptor cell morphogenesis	0.00140739	-6.56602	0.029422	18	5	0.00932836	536	10917	2.49072e+25	Liprin-alpha,Lar,crb,Ire1,peb
	GO:0050920	regulation of chemotaxis	0.00143813	-6.54441	0.02996	11	4	0.00746269	536	10917	2.49072e+20	Liprin-alpha,CadN,Lar,Sema-1a
	GO:0048732	gland development	0.00144343	-6.54073	0.029966	195	20	0.0373134	536	10917	3.41704e+99	Akap200,Fhos,drl,so,comm3,retn,rho,Eip93F,eya,unc-5,drpr,crb,gl,jeb,Drl-2,pnr,gcm,lz,tll,Src64B
	GO:0051056	regulation of small GTPase mediated signal transduction	0.00150184	-6.50107	0.031071	168	18	0.0335821	536	10917	4.18334e+89	SIDL,CG5522,CG5337,MESK2,Akap200,CG7852,step,aop,dos,RhoGAP93B,CG42684,CG9098,CG42674,CG5937,Ced-12,RN-tre,sty,plx
	GO:0007276	gamete generation	0.00163233	-6.41775	0.033654	800	58	0.108209	536	10917	33290,43528,32071,42115,35997,31718,31248,33392,33418,32926,45278,35259,35662,42567,38168,39441,35058,40143,35197,31938,41310,42896,34648,34633,36554,44543,31883,40014,45821,48973,41085,38418,36010,35680,49701,39999,43087,41398,37201,38961,38816,45976,326198,33916,32152,36544,38620,34927,39583,39833,38231,39445,40462,44642,40126,40383,38424,42672	Iris,Cad99C,Kap3,sll,Mmp2,Tbh,sgg,aop,Rab5,out,csw,Lar,so,CASK,rho,mirr,qua,wnd,brat,Yp2,Tsp86D,crb,aret,Ced-12,RN-tre,enc,lz,grim,Abl,Src64B,neur,kst,dila,didum,gish,Eip75B,msi,Csk,ena,Cbl,qm,retn,Krn,eya,wisp,AGO1,blanks,Gli,bbg,aos,alpha-Spec,Klc,Hem,Apc,Rcd7,M6,sty,loco
	GO:0022414	reproductive process	0.00167596	-6.39137	0.034435	990	69	0.128731	536	10917	32158,35997,31718,31248,33418,32926,45278,32619,42567,38168,40143,31938,41310,42896,31883,44543,31364,36897,49701,39999,38504,43087,41398,33739,37201,38961,38816,41363,33916,36544,38620,34927,39445,44642,40126,43528,33290,32071,42115,33392,35259,35662,35058,39441,35197,34648,34633,36554,40014,41247,45821,41085,48973,38418,35680,36010,31271,45976,326198,32152,39833,39583,38231,40462,41182,40383,38…	cac,Mmp2,Tbh,sgg,Rab5,out,csw,para,CASK,rho,wnd,Yp2,Tsp86D,crb,lz,enc,Fas2,inaC,gish,Eip75B,tipE,msi,Csk,qtc,ena,Cbl,qm,pros,eya,AGO1,blanks,Gli,Klc,Apc,Rcd7,Cad99C,Iris,Kap3,sll,aop,Lar,so,qua,mirr,brat,aret,Ced-12,RN-tre,grim,Syn,Abl,neur,Src64B,kst,didum,dila,w,retn,Krn,wisp,aos,bbg,alpha-Spec,Hem,FoxP,M6,sty,loco,robo3
	GO:0045893	positive regulation of transcription, DNA-templated	0.00179526	-6.3226	0.036669	271	25	0.0466418	536	10917	4.38253e+125	sv,Pph13,sim,ro,Bx,so,retn,mirr,Eip93F,CG32006,eya,onecut,Dip3,mam,gl,Atf-2,pnr,gcm,slp2,lz,tll,NC2alpha,slp1,MTF-1,SoxN
	GO:0046152	ommochrome metabolic process	0.00183377	-6.30138	0.036669	19	5	0.00932836	536	10917	3.98364e+24	st,g,p,w,ltd
	GO:0033060	ocellus pigmentation	0.00183377	-6.30138	0.036669	19	5	0.00932836	536	10917	3.98364e+24	st,g,p,w,ltd
	GO:0008055	ocellus pigment biosynthetic process	0.00183377	-6.30138	0.036669	19	5	0.00932836	536	10917	3.98364e+24	st,g,p,w,ltd
	GO:0006727	ommochrome biosynthetic process	0.00183377	-6.30138	0.036669	19	5	0.00932836	536	10917	3.98364e+24	st,g,p,w,ltd
	GO:0051051	negative regulation of transport	0.00183377	-6.30138	0.036669	19	5	0.00932836	536	10917	4.17044e+24	rdx,cmpy,tamo,CG9426,GABA-B-R2
	GO:0072499	photoreceptor cell axon guidance	0.00183377	-6.30138	0.036669	19	5	0.00932836	536	10917	3.39164e+24	eya,gogo,Abl,Fas2,Nrk
	GO:0046158	ocellus pigment metabolic process	0.00183377	-6.30138	0.036669	19	5	0.00932836	536	10917	3.98364e+24	st,g,p,w,ltd
	GO:0032535	regulation of cellular component size	0.00184063	-6.29765	0.036684	105	13	0.0242537	536	10917	2.49072e+67	Liprin-alpha,Cad99C,DAAM,seq,Sema-1a,ena,CadN,Abl,RhoGAPp190,Lar,Src64B,kst,ssh
	GO:0048563	post-embryonic organ morphogenesis	0.0018532	-6.29084	0.03669	457	37	0.0690299	536	10917	3.59004e+184	babo,Mmp2,l(3)neo38,sgg,Rab5,so,CG43340,rho,qua,mirr,mthl1,B-H2,CG42674,rap,tmod,aret,spict,Fas2,fw,neur,CG15312,boi,step,Dok,Fhos,CG11382,Cbl,Bx,CG42684,CG14478,eya,Glut4EF,B-H1,Gli,tow,aos,mam
	GO:0007560	imaginal disc morphogenesis	0.0018532	-6.29084	0.03669	457	37	0.0690299	536	10917	3.59004e+184	babo,Mmp2,l(3)neo38,sgg,Rab5,so,CG43340,rho,qua,mirr,mthl1,B-H2,CG42674,rap,tmod,aret,spict,Fas2,fw,neur,CG15312,boi,step,Dok,Fhos,CG11382,Cbl,Bx,CG42684,CG14478,eya,Glut4EF,B-H1,Gli,tow,aos,mam
	GO:0016319	mushroom body development	0.0018644	-6.28481	0.036749	69	10	0.0186567	536	10917	3.61254e+49	stan,babo,Eph,tll,Fas2,RhoGAPp190,Src64B,CG3638,robo3,ssh
	GO:0048870	cell motility	0.00186847	-6.28264	0.036749	257	24	0.0447761	536	10917	4.97014e+120	gish,ths,ru,ena,aop,Fhos,Rab5,Cbl,csw,qm,so,CASK,Krn,eya,unc-5,Gli,bbg,Tsp86D,rap,Ced-12,Hem,RN-tre,Abl,Sdc
	GO:0007419	ventral cord development	0.00188217	-6.27533	0.036897	37	7	0.0130597	536	10917	3.39164e+34	eya,sim,Abl,svp,robo3,pros,loco
	GO:0010468	regulation of gene expression	0.00195605	-6.23683	0.03822	1154	78	0.145522	536	10917	40370,35184,32429,44786,43422,36401,41423,36064,31248,41612,43234,45278,42358,38168,53579,42896,41704,31883,33608,43656,42110,38963,39999,33239,43087,41363,33916,317817,32724,36544,38620,45816,31000,33607,33509,39089,34370,39071,43825,33392,38321,43023,35662,39441,35197,32723,38469,42210,5740176,34648,39418,44849,34277,45821,32162,44275,32039,42848,3772396,44129,35168,32846,34280,45976,35402,4493…	Aef1,Lim3,hiw,nerfin-1,eIF4E-6,wuc,l(3)neo38,gem,sgg,sim,ro,csw,Ire1,rho,Dip3,crb,rdx,lz,slp2,tll,Hmx,Unr,Eip75B,Pph13,msi,pros,eya,CG32006,B-H1,AGO1,blanks,onecut,elav,slp1,CG17265,MTF-1,Rsf1,Hsp67Bc,sv,aop,dos,dan,so,mirr,brat,B-H2,scrt,gl,CG34340,aret,toe,pnr,gcm,Abl,fw,SoxN,sev,Rox8,seq,hbs,Side,Bx,gcm2,retn,Mio,Eip93F,repo,mam,nvy,svp,Atf-2,Mlf,7B2,NC2alpha,FoxP,sty,peb,CG18599
	GO:0007628	adult walking behavior	0.00207405	-6.17825	0.039969	12	4	0.00746269	536	10917	4.16123e+19	sim,hiw,TBPH,CASK
	GO:0002052	positive regulation of neuroblast proliferation	0.00207405	-6.17825	0.039969	12	4	0.00746269	536	10917	3.17817e+20	CG32006,slp2,slp1,Dap160
	GO:0051224	negative regulation of protein transport	0.00207405	-6.17825	0.039969	12	4	0.00746269	536	10917	4.17044e+19	rdx,cmpy,tamo,CG9426
	GO:0030707	ovarian follicle cell development	0.00208735	-6.17186	0.039969	274	25	0.0466418	536	10917	4.35284e+125	Cad99C,ena,sgg,aop,Rab5,Cbl,csw,CASK,rho,mirr,Krn,eya,Gli,aos,bbg,Tsp86D,alpha-Spec,Klc,Ced-12,RN-tre,sty,Src64B,neur,loco,kst
	GO:0002165	instar larval or pupal development	0.00209137	-6.16993	0.039969	640	48	0.0895522	536	10917	33374,35900,34170,35997,41423,31248,33418,35662,39696,38168,35058,35698,39441,32637,32723,40205,45922,43633,34648,32420,34681,40014,31364,32423,41085,32162,31229,31940,35425,31667,39004,31069,32846,38961,32754,36964,44936,33916,32724,38218,41217,38755,34927,39833,38231,36555,32422,44642	Npc2a,babo,Akap200,Mmp2,l(3)neo38,sgg,Rab5,so,comm3,rho,qua,CG43340,mirr,mthl1,B-H2,CG42674,rap,tmod,aret,CG9509,spict,grim,Fas2,Eo,neur,fw,boi,CG15312,step,Dok,Fhos,CG11382,Bx,Cbl,CG42684,CG14478,Eip93F,eya,B-H1,drpr,Glut4EF,tow,Gli,aos,alpha-Spec,mam,CG12398,Apc
	GO:0007422	peripheral nervous system development	0.00209478	-6.16831	0.039969	94	12	0.0223881	536	10917	3.60103e+59	dila,Gli,Appl,Eph,cpo,tutl,phyl,rho,neur,pros,mirr,repo
	GO:0046533	negative regulation of photoreceptor cell differentiation	0.00210574	-6.16309	0.039969	6	3	0.00559701	536	10917	333924323431017	aop,ro,sdk
	GO:0048790	maintenance of presynaptic active zone structure	0.00210574	-6.16309	0.039969	6	3	0.00559701	536	10917	359774375838231	brp,RhoGAP100F,alpha-Spec
	GO:0002028	regulation of sodium ion transport	0.00210574	-6.16309	0.039969	6	3	0.00559701	536	10917	379794121538504	NKAIN,Teh1,tipE
	GO:0003006	developmental process involved in reproduction	0.00211406	-6.15914	0.04	775	56	0.104478	536	10917	33290,43528,32071,42115,35997,31248,33392,33418,32926,45278,35259,42567,38168,35058,39441,35197,31938,42896,41310,34648,34633,31883,36554,44543,40014,45821,31364,36897,48973,41085,38418,35680,49701,39999,43087,41398,37201,38961,38816,45976,326198,33916,32152,34927,36544,38620,39833,39583,38231,40462,39445,40383,44642,38424,33314,42672	Iris,Cad99C,Kap3,sll,Mmp2,sgg,aop,Rab5,out,csw,Lar,CASK,rho,qua,mirr,brat,Yp2,crb,Tsp86D,aret,Ced-12,lz,RN-tre,enc,grim,Abl,Fas2,inaC,Src64B,neur,kst,didum,gish,Eip75B,msi,Csk,ena,Cbl,qm,retn,Krn,eya,wisp,Gli,AGO1,blanks,aos,bbg,alpha-Spec,Hem,Klc,M6,Apc,sty,robo3,loco
	GO:0044702	single organism reproductive process	0.00214379	-6.14518	0.040435	861	61	0.113806	536	10917	33290,43528,32071,42115,35997,31718,31248,33392,33418,32926,45278,35259,35662,42567,38168,39441,35058,40143,35197,31938,41310,42896,34648,34633,36554,31883,44543,40014,45821,31364,36897,48973,41085,38418,36010,35680,49701,39999,43087,41398,37201,38961,38816,45976,326198,33916,32152,36544,38620,34927,39583,39833,38231,39445,40462,44642,40383,40126,38424,33314,42672	Iris,Cad99C,Kap3,sll,Mmp2,Tbh,sgg,aop,Rab5,out,csw,Lar,so,CASK,rho,mirr,qua,wnd,brat,Yp2,Tsp86D,crb,aret,Ced-12,RN-tre,lz,enc,grim,Abl,Fas2,inaC,Src64B,neur,kst,dila,didum,gish,Eip75B,msi,Csk,ena,Cbl,qm,retn,Krn,eya,wisp,AGO1,blanks,Gli,bbg,aos,alpha-Spec,Klc,Hem,Apc,M6,Rcd7,sty,robo3,loco
	GO:0002066	columnar/cuboidal epithelial cell development	0.00219333	-6.12234	0.041239	275	25	0.0466418	536	10917	4.35284e+125	Cad99C,ena,sgg,aop,Rab5,Cbl,csw,CASK,rho,mirr,Krn,eya,Gli,aos,bbg,Tsp86D,alpha-Spec,Klc,Ced-12,RN-tre,sty,Src64B,neur,loco,kst
	GO:0048665	neuron fate specification	0.00234755	-6.05438	0.043205	20	5	0.00932836	536	10917	3.17817e+25	CG32006,slp2,slp1,ro,sev
	GO:0006836	neurotransmitter transport	0.00235923	-6.04942	0.043205	134	15	0.0279851	536	10917	3.59775e+76	brp,comt,DAT,cac,stnB,CG43066,Syt4,Caps,Syn,Dap160,CASK,Syt12,Syx13,CanB,Syt14
	GO:0001700	embryonic development via the syncytial blastoderm	0.00237167	-6.04416	0.043205	175	18	0.0335821	536	10917	3.12924e+89	kirre,step,Dok,ena,aop,Sema-1b,Rab5,Lar,mirr,crb,svp,Atpalpha,Sema-5c,pnr,Abl,Apc,peb,Src64B
	GO:0040037	negative regulation of fibroblast growth factor receptor signaling pathway	0.00240631	-6.02966	0.043205	2	2	0.00373134	536	10917	3842435997	sty,Mmp2
	GO:0030335	positive regulation of cell migration	0.00240631	-6.02966	0.043205	2	2	0.00373134	536	10917	3720139004	ena,Fhos
	GO:0007462	R1/R6 cell fate commitment	0.00240631	-6.02966	0.043205	2	2	0.00373134	536	10917	4149136606	svp,phyl
	GO:0031536	positive regulation of exit from mitosis	0.00240631	-6.02966	0.043205	2	2	0.00373134	536	10917	4592234648	rap,aret
	GO:0042673	regulation of retinal cone cell fate specification	0.00240631	-6.02966	0.043205	2	2	0.00373134	536	10917	4382541363	sv,pros
	GO:0055060	asymmetric neuroblast division resulting in ganglion mother cell formation	0.00240631	-6.02966	0.043205	2	2	0.00373134	536	10917	3519741363	brat,pros
	GO:1902866	regulation of retina development in camera-type eye	0.00240631	-6.02966	0.043205	2	2	0.00373134	536	10917	4382541363	sv,pros
	GO:0060222	regulation of retinal cone cell fate commitment	0.00240631	-6.02966	0.043205	2	2	0.00373134	536	10917	4382541363	sv,pros
	GO:0035164	embryonic plasmatocyte differentiation	0.00240631	-6.02966	0.043205	2	2	0.00373134	536	10917	3427734280	gcm,gcm2
	GO:2000147	positive regulation of cell motility	0.00240631	-6.02966	0.043205	2	2	0.00373134	536	10917	3720139004	ena,Fhos
	GO:0061074	regulation of neural retina development	0.00240631	-6.02966	0.043205	2	2	0.00373134	536	10917	4382541363	sv,pros
	GO:0060233	oenocyte delamination	0.00240631	-6.02966	0.043205	2	2	0.00373134	536	10917	3339239833	aop,aos
	GO:0002065	columnar/cuboidal epithelial cell differentiation	0.00241911	-6.02435	0.043305	277	25	0.0466418	536	10917	4.35284e+125	Cad99C,ena,sgg,aop,Rab5,Cbl,csw,CASK,rho,mirr,Krn,eya,Gli,aos,bbg,Tsp86D,alpha-Spec,Klc,Ced-12,RN-tre,sty,Src64B,neur,loco,kst
	GO:0035150	regulation of tube size	0.00243541	-6.01764	0.043467	49	8	0.0149254	536	10917	3.61254e+39	stan,vari,crok,Gli,Fas2,wus,sano,Atpalpha
	GO:0050769	positive regulation of neurogenesis	0.00245975	-6.0077	0.04364	29	6	0.011194	536	10917	3.42773e+30	gcm,CG32006,slp2,slp1,kat-60L1,Dap160
	GO:0030865	cortical cytoskeleton organization	0.00245975	-6.0077	0.04364	29	6	0.011194	536	10917	4.04624e+29	Hem,Sra-1,brp,mtm,RhoGAP100F,loco
	GO:0051173	positive regulation of nitrogen compound metabolic process	0.002471	-6.00313	0.04371	323	28	0.0522388	536	10917	4.38254e+142	sv,PGRP-LC,Pph13,sim,ro,Bx,ird1,so,retn,mirr,Eip93F,eya,CG32006,onecut,Dip3,mam,gl,Atf-2,pnr,gcm,slp2,lz,tll,NC2alpha,slp1,Octbeta3R,MTF-1,SoxN
	GO:0048813	dendrite morphogenesis	0.00251181	-5.98675	0.044301	190	19	0.0354478	536	10917	3.59004e+100	babo,sv,nerfin-1,Sema-1a,seq,ena,futsch,aop,Actbeta,Rab5,gcm2,retn,pros,stan,nvy,scrt,CG34340,comm,gcm
	GO:0007455	eye-antennal disc morphogenesis	0.0025833	-5.95869	0.045428	39	7	0.0130597	536	10917	3.39163e+34	eya,B-H2,babo,B-H1,aos,rap,so
	GO:0002121	inter-male aggressive behavior	0.0027775	-5.88621	0.048629	50	8	0.0149254	536	10917	3.46485e+39	aret,Spn,Tbh,Bx,CG42684,CG14478,neur,CG3638
	GO:1902680	positive regulation of RNA biosynthetic process	0.00279475	-5.88001	0.048629	280	25	0.0466418	536	10917	4.38253e+125	sv,Pph13,sim,ro,Bx,so,retn,mirr,Eip93F,CG32006,eya,onecut,Dip3,mam,gl,Atf-2,pnr,gcm,slp2,lz,tll,NC2alpha,slp1,MTF-1,SoxN
	GO:0051648	vesicle localization	0.00279785	-5.8789	0.048629	110	13	0.0242537	536	10917	2.49072e+67	Liprin-alpha,comt,Aplip1,Pi4KIIalpha,stnB,unc-104,Syt4,Caps,Syn,Rab5,Dap160,CASK,Syx13
	GO:0007269	neurotransmitter secretion	0.00279785	-5.8789	0.048629	110	13	0.0242537	536	10917	3.59775e+66	brp,comt,cac,stnB,Syt4,Caps,Syn,Dap160,CASK,Syx13,Syt12,CanB,Syt14
	GO:0048072	compound eye pigmentation	0.00288057	-5.84977	0.049491	13	4	0.00746269	536	10917	4.48194e+19	g,p,w,ltd
	GO:2000179	positive regulation of neural precursor cell proliferation	0.00288057	-5.84977	0.049491	13	4	0.00746269	536	10917	3.17817e+20	CG32006,slp2,slp1,Dap160
	GO:0008057	eye pigment granule organization	0.00288057	-5.84977	0.049491	13	4	0.00746269	536	10917	3.27243e+19	B-H1,B-H2,g,ltd
	GO:2000648	positive regulation of stem cell proliferation	0.00288057	-5.84977	0.049491	13	4	0.00746269	536	10917	3.17817e+20	CG32006,slp2,slp1,Dap160
	GO:0048737	imaginal disc-derived appendage development	0.00290299	-5.84202	0.049733	405	33	0.0615672	536	10917	3.59004e+164	babo,l(3)neo38,sgg,Rab5,rho,mirr,qua,CG43340,mthl1,CG42674,Dip3,tmod,aret,spict,lz,fw,neur,boi,CG15312,step,Dok,Fhos,CG11382,Bx,drl,Cbl,CG42684,CG14478,Glut4EF,Gli,tow,aos,mam
	GO:0034332	adherens junction organization	0.00294936	-5.82617	0.05024	30	6	0.011194	536	10917	4.48613e+29	sdt,kirre,crb,Src64B,Csk,kst
	GO:0019991	septate junction assembly	0.00294936	-5.82617	0.05024	30	6	0.011194	536	10917	3.53433e+29	vari,bou,Gli,crok,loco,Atpalpha
	GO:0022412	cellular process involved in reproduction in multicellular organism	0.00297908	-5.81614	0.050602	736	53	0.0988806	536	10917	33290,43528,32071,42115,35997,31248,33392,33418,32926,45278,35259,42567,38168,39441,35058,35197,31938,41310,42896,34648,34633,36554,31883,44543,40014,45821,48973,41085,38418,35680,49701,39999,43087,41398,37201,38961,38816,45976,326198,33916,32152,36544,38620,34927,39583,39833,38231,39445,40462,44642,40383,38424,42672	Iris,Cad99C,Kap3,sll,Mmp2,sgg,aop,Rab5,out,csw,Lar,CASK,rho,mirr,qua,brat,Yp2,Tsp86D,crb,aret,Ced-12,RN-tre,lz,enc,grim,Abl,Src64B,neur,kst,didum,gish,Eip75B,msi,Csk,ena,Cbl,qm,retn,Krn,eya,wisp,AGO1,blanks,Gli,bbg,aos,alpha-Spec,Klc,Hem,Apc,M6,sty,loco
	GO:0023061	signal release	0.00303112	-5.79882	0.05134	111	13	0.0242537	536	10917	3.59775e+66	brp,comt,cac,stnB,Syt4,Caps,Syn,Dap160,CASK,Syx13,Syt12,CanB,Syt14
	GO:0048598	embryonic morphogenesis	0.00305799	-5.79	0.051649	237	22	0.0410448	536	10917	3.16674e+109	Dok,ena,aop,sdt,Rab5,so,rho,mthl1,Z600,eya,mam,crb,svp,jeb,pnr,tll,slp1,Abl,Apc,T48,Src64B,peb
	GO:0030031	cell projection assembly	0.00311924	-5.77017	0.052535	86	11	0.0205224	536	10917	3.17817e+55	CG32006,dila,mtm,Kap3,unc-104,CG15923,CG5142,Sra-1,Hem,slp2,slp1
	GO:0006796	phosphate-containing compound metabolic process	0.00314705	-5.76129	0.052855	755	54	0.100746	536	10917	2768892,35900,34367,34385,40224,31248,33392,45278,41096,35259,36445,42567,42358,40143,34069,42187,40471,35646,36436,41112,37888,45821,36897,31245,48973,49701,53472,43950,40670,32039,41398,37824,43792,44355,43469,37465,39732,5740362,326198,33916,33845,34553,36579,41701,37978,43803,48971,32230,40846,39071,41203,37633,42986,44317	CG42271,babo,Ror,Cdk5alpha,rdgC,sgg,aop,csw,ird1,Lar,Nrk,CASK,Ire1,wnd,CG7115,CG7156,CG11426,Gadd45,Drl-2,CG8866,betaTub60D,Abl,inaC,Seipin,Src64B,gish,Aplip1,CdsA,Pi4KIIalpha,sev,Csk,Pask,CaMKI,drl,Ptp99A,CG10082,sff,CG34384,Krn,eya,mtm,Gyc32E,CG8485,Ipp,Atf-2,Eph,Atpalpha,CG3812,Dpck,Hsp67Bc,CG8500,PIP5K59B,ssh,CanB
	GO:0016358	dendrite development	0.00317526	-5.75237	0.053175	194	19	0.0354478	536	10917	4.38254e+100	sv,babo,nerfin-1,Sema-1a,seq,futsch,ena,aop,Actbeta,Rab5,gcm2,retn,pros,stan,nvy,scrt,CG34340,comm,gcm
	GO:0045935	positive regulation of nucleobase-containing compound metabolic process	0.00318391	-5.74965	0.053175	298	26	0.0485075	536	10917	4.38253e+132	sv,Pph13,sim,ro,Bx,so,retn,mirr,Eip93F,CG32006,eya,onecut,Dip3,mam,gl,Atf-2,pnr,gcm,slp2,lz,tll,NC2alpha,slp1,Octbeta3R,MTF-1,SoxN
	GO:0009314	response to radiation	0.0032158	-5.73968	0.053558	152	16	0.0298507	536	10917	3.59004e+79	babo,CdsA,cac,rdgC,Tsp42Ej,Ace,eya,Vha100-1,svp,gl,CG11426,betaTub60D,Syn,M6,inaC,Sdc
	GO:0009886	post-embryonic morphogenesis	0.00322754	-5.73604	0.053604	554	42	0.0783582	536	10917	3.59003e+209	babo,Akap200,Mmp2,l(3)neo38,sgg,Rab5,so,comm3,CG43340,rho,qua,mirr,mthl1,B-H2,CG42674,rap,tmod,aret,spict,grim,Fas2,fw,neur,CG15312,boi,step,Dok,Fhos,CG11382,Cbl,Bx,CG42684,CG14478,Eip93F,eya,Glut4EF,drpr,B-H1,Gli,tow,aos,mam
	GO:0002376	immune system process	0.00323818	-5.73274	0.053632	268	24	0.0447761	536	10917	3.97064e+122	Eig71Ee,PGRP-LC,Eip75B,Cdk5alpha,Mmp2,RhoBTB,DCX-EMAP,Tsp68C,dos,gcm2,eya,alpha-Man-IIb,Dip3,bbg,Atf-2,Eph,PGRP-LD,pnr,gcm,CG42339,LysX,lz,grim,IM23
	GO:0048736	appendage development	0.00325848	-5.7265	0.053819	408	33	0.0615672	536	10917	3.59004e+164	babo,l(3)neo38,sgg,Rab5,rho,mirr,qua,CG43340,mthl1,CG42674,Dip3,tmod,aret,spict,lz,fw,neur,boi,CG15312,step,Dok,Fhos,CG11382,Bx,drl,Cbl,CG42684,CG14478,Glut4EF,Gli,tow,aos,mam
	GO:0002064	epithelial cell development	0.00333107	-5.70446	0.054866	299	26	0.0485075	536	10917	4.35284e+130	Cad99C,ena,sgg,aop,Rab5,Cbl,csw,CASK,rho,mirr,Krn,eya,Gli,aos,bbg,Tsp86D,alpha-Spec,Klc,Ced-12,RN-tre,Abl,sty,Src64B,neur,loco,kst
	GO:0051130	positive regulation of cellular component organization	0.00336691	-5.69376	0.055304	139	15	0.0279851	536	10917	4.70913e+74	comt,DAAM,cac,Jupiter,Atf-2,Syt4,ena,comm,Ank2,sgg,Fhos,kat-60L1,Apc,CASK,Sdc
	GO:0051656	establishment of organelle localization	0.00342152	-5.67767	0.056047	181	18	0.0335821	536	10917	2.49072e+93	Liprin-alpha,comt,wisp,didum,Aplip1,stnB,unc-104,Nnf1b,Syt4,Khc-73,Caps,Syn,Rab5,Dap160,CASK,Syx13,ens,klar
	GO:0060560	developmental growth involved in morphogenesis	0.00343287	-5.67436	0.05608	63	9	0.016791	536	10917	4.01432e+45	wnd,Liprin-alpha,vari,RhoGAP100F,Dok,Ank2,CadN,Abl,Lar
	GO:0051270	regulation of cellular component movement	0.0034695	-5.66374	0.056524	41	7	0.0130597	536	10917	2.49072e+35	Liprin-alpha,ena,Fhos,CadN,Lar,ens,Sema-1a
	GO:0016049	cell growth	0.00349609	-5.65611	0.056802	75	10	0.0186567	536	10917	4.01432e+50	wnd,Liprin-alpha,RhoGAP100F,Dok,Hem,CycD,Ank2,Actbeta,CadN,Lar
	GO:0021782	glial cell development	0.00350829	-5.65263	0.056846	31	6	0.011194	536	10917	3.42773e+29	gcm,gcm2,svp,sty,loco,repo
	GO:0051254	positive regulation of RNA metabolic process	0.00353064	-5.64628	0.056934	285	25	0.0466418	536	10917	4.38253e+125	sv,Pph13,sim,ro,Bx,so,retn,mirr,Eip93F,CG32006,eya,onecut,Dip3,mam,gl,Atf-2,pnr,gcm,slp2,lz,tll,NC2alpha,slp1,MTF-1,SoxN
	GO:0051493	regulation of cytoskeleton organization	0.00353275	-5.64568	0.056934	100	12	0.0223881	536	10917	4.97014e+59	gish,Patronin,alpha-Spec,DAAM,step,CG15923,Jupiter,ena,Fhos,Abl,Src64B,ssh
	GO:0042308	negative regulation of protein import into nucleus	0.00355108	-5.6405	0.057075	7	3	0.00559701	536	10917	417043786434719	rdx,tamo,CG9426
	GO:0008283	cell proliferation	0.00362928	-5.61872	0.058176	182	18	0.0335821	536	10917	3.59003e+89	babo,Gbeta13F,CycD,sdt,Cbl,gcm2,pros,rho,brat,AGO1,alpha-Spec,svp,aret,gcm,enc,tll,Apc,loco
	GO:0090175	regulation of establishment of planar polarity	0.00367636	-5.60583	0.058773	22	5	0.00932836	536	10917	3.61253e+24	stan,aop,gish,Akap200,Abl
	GO:0008360	regulation of cell shape	0.00382766	-5.5655	0.061028	114	13	0.0242537	536	10917	4.02054e+64	CG42674,alpha-Spec,CG7115,Atpalpha,Dok,Hem,Sra-1,ena,Abl,Fas2,CG3618,Lar,CASK
	GO:0048707	instar larval or pupal morphogenesis	0.00386248	-5.55645	0.061339	543	41	0.0764925	536	10917	3.59003e+204	babo,Akap200,Mmp2,l(3)neo38,sgg,Rab5,so,comm3,CG43340,rho,qua,mirr,mthl1,B-H2,CG42674,rap,tmod,aret,spict,Fas2,fw,neur,CG15312,boi,step,Dok,Fhos,CG11382,Cbl,Bx,CG42684,CG14478,Eip93F,eya,Glut4EF,drpr,B-H1,Gli,tow,aos,mam
	GO:0048753	pigment granule organization	0.0038779	-5.55246	0.061339	14	4	0.00746269	536	10917	3.27243e+19	B-H1,B-H2,g,ltd
	GO:0033059	cellular pigmentation	0.0038779	-5.55246	0.061339	14	4	0.00746269	536	10917	3.27243e+19	B-H1,B-H2,g,ltd
	GO:0008284	positive regulation of cell proliferation	0.00403212	-5.51346	0.06311	53	8	0.0149254	536	10917	3.12293e+41	boi,CG32006,crb,gcm,slp2,slp1,Dap160,Krn
	GO:0007405	neuroblast proliferation	0.00403212	-5.51346	0.06311	53	8	0.0149254	536	10917	3.51974e+39	brat,babo,Gbeta13F,tll,sdt,Apc,loco,pros
	GO:0061351	neural precursor cell proliferation	0.00403212	-5.51346	0.06311	53	8	0.0149254	536	10917	3.51974e+39	brat,babo,Gbeta13F,tll,sdt,Apc,pros,loco
	GO:0002118	aggressive behavior	0.00403212	-5.51346	0.06311	53	8	0.0149254	536	10917	3.46485e+39	aret,Spn,Tbh,Bx,CG42684,CG14478,neur,CG3638
	GO:0031098	stress-activated protein kinase signaling cascade	0.00414227	-5.48651	0.064665	32	6	0.011194	536	10917	3.56463e+29	Gadd45,aop,Aplip1,Src64B,Atf-2,Dok
	GO:0006793	phosphorus metabolic process	0.00424934	-5.46099	0.066036	766	54	0.100746	536	10917	2768892,35900,34367,34385,40224,31248,33392,45278,41096,35259,36445,42567,42358,40143,34069,42187,40471,35646,36436,41112,37888,45821,36897,31245,48973,49701,53472,43950,40670,32039,41398,37824,43792,44355,43469,37465,39732,5740362,326198,33916,33845,34553,36579,41701,37978,43803,48971,32230,40846,39071,41203,37633,42986,44317	CG42271,babo,Ror,Cdk5alpha,rdgC,sgg,aop,csw,ird1,Lar,Nrk,CASK,Ire1,wnd,CG7115,CG7156,CG11426,Gadd45,Drl-2,CG8866,betaTub60D,Abl,inaC,Seipin,Src64B,gish,Aplip1,CdsA,Pi4KIIalpha,sev,Csk,Pask,CaMKI,drl,Ptp99A,CG10082,sff,CG34384,Krn,eya,mtm,Gyc32E,CG8485,Ipp,Atf-2,Eph,Atpalpha,CG3812,Dpck,Hsp67Bc,CG8500,PIP5K59B,ssh,CanB
	GO:0051223	regulation of protein transport	0.0042522	-5.46032	0.066036	65	9	0.016791	536	10917	4.28963e+44	crb,CG9426,ru,rdx,sgg,cmpy,Abl,tamo,CanB
	GO:0031328	positive regulation of cellular biosynthetic process	0.00431036	-5.44673	0.066593	336	28	0.0522388	536	10917	4.38254e+142	sv,PGRP-LC,Pph13,sim,ro,Bx,ird1,so,retn,mirr,Eip93F,eya,CG32006,onecut,Dip3,mam,gl,Atf-2,pnr,gcm,slp2,lz,tll,NC2alpha,slp1,Octbeta3R,MTF-1,SoxN
	GO:0009891	positive regulation of biosynthetic process	0.00431036	-5.44673	0.066593	336	28	0.0522388	536	10917	4.38254e+142	sv,PGRP-LC,Pph13,sim,ro,Bx,ird1,so,retn,mirr,Eip93F,eya,CG32006,onecut,Dip3,mam,gl,Atf-2,pnr,gcm,slp2,lz,tll,NC2alpha,slp1,Octbeta3R,MTF-1,SoxN
	GO:0007398	ectoderm development	0.00451102	-5.40123	0.069514	23	5	0.00932836	536	10917	4.48494e+24	pnr,sim,mam,peb,neur
	GO:0035114	imaginal disc-derived appendage morphogenesis	0.00457166	-5.38788	0.070267	401	32	0.0597015	536	10917	3.59004e+159	babo,l(3)neo38,sgg,Rab5,CG43340,rho,qua,mirr,mthl1,CG42674,Dip3,tmod,aret,spict,lz,fw,neur,CG15312,boi,step,Dok,Fhos,CG11382,Cbl,Bx,CG42684,CG14478,Glut4EF,Gli,tow,aos,mam
	GO:0007265	Ras protein signal transduction	0.00465599	-5.3696	0.07138	78	10	0.0186567	536	10917	3.52674e+49	CdGAPr,RabX4,RhoGAP100F,Rab14,Lrch,RhoGAPp190,Rab5,CG42684,phyl,ltd
	GO:0048589	developmental growth	0.00470385	-5.35937	0.07158	144	15	0.0279851	536	10917	4.01432e+75	wnd,Liprin-alpha,vari,RhoGAP100F,jeb,Atpalpha,Dok,Hem,Ank2,sgg,CadN,Abl,Lar,Dap160,repo
	GO:0090130	tissue migration	0.00471191	-5.35766	0.07158	158	16	0.0298507	536	10917	4.48564e+80	ru,ena,aop,Rab5,Cbl,csw,CASK,Krn,mthl1,Gli,bbg,Tsp86D,jeb,Ced-12,RN-tre,Sdc
	GO:0042127	regulation of cell proliferation	0.00471191	-5.35766	0.07158	158	16	0.0298507	536	10917	3.12294e+81	boi,CG13284,Csk,cpo,Rab5,Cbl,Dap160,pros,Krn,CG32006,brat,crb,gcm,Mlf,slp2,slp1
	GO:0031327	negative regulation of cellular biosynthetic process	0.00472893	-5.35406	0.07158	307	26	0.0485075	536	10917	3.89634e+132	Unr,Aef1,eIF4E-6,wuc,msi,GABA-B-R1,seq,aop,Side,Cbl,retn,mirr,pros,GABA-B-R2,CG32006,B-H2,B-H1,AGO1,scrt,aret,toe,pnr,slp2,lz,NC2alpha,slp1
	GO:0009890	negative regulation of biosynthetic process	0.00472893	-5.35406	0.07158	307	26	0.0485075	536	10917	3.89634e+132	Unr,Aef1,eIF4E-6,wuc,msi,GABA-B-R1,seq,aop,Side,Cbl,retn,mirr,pros,GABA-B-R2,CG32006,B-H2,B-H1,AGO1,scrt,aret,toe,pnr,slp2,lz,NC2alpha,slp1
	GO:0042659	regulation of cell fate specification	0.00485706	-5.32732	0.073149	33	6	0.011194	536	10917	3.39163e+29	eya,aop,sv,aos,sty,pros
	GO:0030100	regulation of endocytosis	0.00485706	-5.32732	0.073149	33	6	0.011194	536	10917	3.97174e+31	comm,brat,Rab5,step,stnB,CASK
	GO:0048167	regulation of synaptic plasticity	0.00508529	-5.2814	0.075732	15	4	0.00746269	536	10917	3.59775e+19	brp,comt,Sap47,Syt4
	GO:0007522	visceral muscle development	0.00508529	-5.2814	0.075732	15	4	0.00746269	536	10917	3.62583e+19	ths,kirre,jeb,klar
	GO:0051588	regulation of neurotransmitter transport	0.00508529	-5.2814	0.075732	15	4	0.00746269	536	10917	3.21584e+19	cac,CASK,GABA-B-R2,Syt4
	GO:0046928	regulation of neurotransmitter secretion	0.00508529	-5.2814	0.075732	15	4	0.00746269	536	10917	3.21584e+19	cac,CASK,GABA-B-R2,Syt4
	GO:0032880	regulation of protein localization	0.00510345	-5.27784	0.075732	79	10	0.0186567	536	10917	4.28963e+49	crb,CG9426,ru,rdx,sgg,cmpy,Abl,tamo,pros,CanB
	GO:0035107	appendage morphogenesis	0.00510455	-5.27762	0.075732	404	32	0.0597015	536	10917	3.59004e+159	babo,l(3)neo38,sgg,Rab5,CG43340,rho,qua,mirr,mthl1,CG42674,Dip3,tmod,aret,spict,lz,fw,neur,CG15312,boi,step,Dok,Fhos,CG11382,Cbl,Bx,CG42684,CG14478,Glut4EF,Gli,tow,aos,mam
	GO:0051046	regulation of secretion	0.00521013	-5.25715	0.077107	44	7	0.0130597	536	10917	4.48564e+34	ru,cmpy,cac,corn,CASK,GABA-B-R2,Syt4
	GO:0007517	muscle organ development	0.0052952	-5.24095	0.078173	132	14	0.0261194	536	10917	4.38253e+71	sv,kirre,nvy,CG34340,jeb,ths,Ced-12,aop,drl,wech,Scgbeta,retn,ens,klar
	GO:0051147	regulation of muscle cell differentiation	0.00547569	-5.20744	0.079657	8	3	0.00559701	536	10917	366323107531292	mspo,DAAM,kirre
	GO:1901861	regulation of muscle tissue development	0.00547569	-5.20744	0.079657	8	3	0.00559701	536	10917	441293129231290	hbs,kirre,rst
	GO:0051153	regulation of striated muscle cell differentiation	0.00547569	-5.20744	0.079657	8	3	0.00559701	536	10917	366323107531292	mspo,DAAM,kirre
	GO:0042688	crystal cell differentiation	0.00547569	-5.20744	0.079657	8	3	0.00559701	536	10917	342773188334280	gcm,lz,gcm2
	GO:0042676	compound eye cone cell fate commitment	0.00547569	-5.20744	0.079657	8	3	0.00559701	536	10917	448564382541363	ru,sv,pros
	GO:0016202	regulation of striated muscle tissue development	0.00547569	-5.20744	0.079657	8	3	0.00559701	536	10917	441293129231290	hbs,kirre,rst
	GO:0051640	organelle localization	0.00549499	-5.20392	0.079744	204	19	0.0354478	536	10917	2.49072e+98	Liprin-alpha,comt,wisp,didum,Aplip1,Pi4KIIalpha,stnB,unc-104,Nnf1b,Syt4,Khc-73,Caps,Syn,Rab5,Dap160,CASK,Syx13,ens,klar
	GO:0042059	negative regulation of epidermal growth factor receptor signaling pathway	0.00565846	-5.1746	0.08172	34	6	0.011194	536	10917	5.34373e+29	Sulf1,kek2,Cbl,aos,Fas2,sty
	GO:1901185	negative regulation of ERBB signaling pathway	0.00565846	-5.1746	0.08172	34	6	0.011194	536	10917	5.34373e+29	Sulf1,kek2,Cbl,aos,Fas2,sty
	GO:0014902	myotube differentiation	0.00591522	-5.13023	0.085017	45	7	0.0130597	536	10917	3.46334e+34	Ced-12,Hem,hbs,kirre,dock,rst,ens
	GO:0048871	multicellular organismal homeostasis	0.00591522	-5.13023	0.085017	45	7	0.0130597	536	10917	4.02244e+34	rdgC,crb,rho,peb,Sdc,Csk,Atpalpha
	GO:0070201	regulation of establishment of protein localization	0.0063424	-5.0605	0.090881	69	9	0.016791	536	10917	4.28963e+44	crb,CG9426,ru,rdx,sgg,cmpy,Abl,tamo,CanB
	GO:0007264	small GTPase mediated signal transduction	0.00635358	-5.05874	0.090881	121	13	0.0242537	536	10917	3.52674e+64	CdGAPr,RabX4,RhoGAP100F,Rab14,RhoBTB,Lrch,Rab5,RhoGAPp190,CG42684,CG9098,phyl,CG8500,ltd
	GO:0034333	adherens junction assembly	0.00652088	-5.03275	0.091391	16	4	0.00746269	536	10917	4.48613e+19	sdt,kirre,crb,kst
	GO:0007412	axon target recognition	0.00652088	-5.03275	0.091391	16	4	0.00746269	536	10917	2.49072e+20	Liprin-alpha,CadN,Liprin-gamma,Lar
	GO:0045676	regulation of R7 cell differentiation	0.00652088	-5.03275	0.091391	16	4	0.00746269	536	10917	4.38253e+19	sv,aop,sev,pros
	GO:0007300	ovarian nurse cell to oocyte transport	0.00655229	-5.02794	0.091391	35	6	0.011194	536	10917	3.72015e+29	ena,Abl,alpha-Spec,Src64B,qua,loco
	GO:0008293	torso signaling pathway	0.00655229	-5.02794	0.091391	35	6	0.011194	536	10917	4.36564e+29	tll,dos,csw,sev,sty,peb
	GO:0010453	regulation of cell fate commitment	0.00655229	-5.02794	0.091391	35	6	0.011194	536	10917	3.39163e+29	eya,aop,sv,aos,sty,pros
	GO:1900180	regulation of protein localization to nucleus	0.00655229	-5.02794	0.091391	35	6	0.011194	536	10917	4.17043e+29	rdx,sgg,tamo,CG9426,pros,CanB
	GO:0007173	epidermal growth factor receptor signaling pathway	0.00655229	-5.02794	0.091391	35	6	0.011194	536	10917	4.48564e+30	ru,Cbl,csw,sty,rho,Krn
	GO:0038127	ERBB signaling pathway	0.00655229	-5.02794	0.091391	35	6	0.011194	536	10917	4.48564e+30	ru,Cbl,csw,sty,rho,Krn
	GO:0050768	negative regulation of neurogenesis	0.00656929	-5.02535	0.091391	25	5	0.00932836	536	10917	3.51974e+26	brat,CadN,aos,pros,seq
	GO:0048489	synaptic vesicle transport	0.00658801	-5.0225	0.091391	108	12	0.0223881	536	10917	2.49072e+62	Liprin-alpha,comt,Aplip1,stnB,unc-104,Syt4,Caps,Syn,Rab5,Dap160,CASK,Syx13
	GO:0097480	establishment of synaptic vesicle localization	0.00658801	-5.0225	0.091391	108	12	0.0223881	536	10917	2.49072e+62	Liprin-alpha,comt,Aplip1,stnB,unc-104,Syt4,Caps,Syn,Rab5,Dap160,CASK,Syx13
	GO:0097479	synaptic vesicle localization	0.00658801	-5.0225	0.091391	108	12	0.0223881	536	10917	2.49072e+62	Liprin-alpha,comt,Aplip1,stnB,unc-104,Syt4,Caps,Syn,Rab5,Dap160,CASK,Syx13
	GO:0007476	imaginal disc-derived wing morphogenesis	0.00692237	-4.973	0.09383	348	28	0.0522388	536	10917	3.12293e+139	boi,CG15312,babo,step,Dok,l(3)neo38,CG11382,sgg,Fhos,Bx,Cbl,CG42684,CG14478,CG43340,rho,qua,mirr,mthl1,Glut4EF,tow,Gli,aos,tmod,mam,aret,spict,neur,fw
	GO:0030809	negative regulation of nucleotide biosynthetic process	0.00698348	-4.96421	0.09383	3	2	0.00373134	536	10917	3487842561	GABA-B-R1,GABA-B-R2
	GO:1900543	negative regulation of purine nucleotide metabolic process	0.00698348	-4.96421	0.09383	3	2	0.00373134	536	10917	3487842561	GABA-B-R1,GABA-B-R2
	GO:0030803	negative regulation of cyclic nucleotide biosynthetic process	0.00698348	-4.96421	0.09383	3	2	0.00373134	536	10917	3487842561	GABA-B-R1,GABA-B-R2
	GO:0030800	negative regulation of cyclic nucleotide metabolic process	0.00698348	-4.96421	0.09383	3	2	0.00373134	536	10917	3487842561	GABA-B-R1,GABA-B-R2
	GO:0030818	negative regulation of cAMP biosynthetic process	0.00698348	-4.96421	0.09383	3	2	0.00373134	536	10917	3487842561	GABA-B-R1,GABA-B-R2
	GO:0061541	rhabdomere morphogenesis	0.00698348	-4.96421	0.09383	3	2	0.00373134	536	10917	4289642358	crb,Ire1
	GO:0007194	negative regulation of adenylate cyclase activity	0.00698348	-4.96421	0.09383	3	2	0.00373134	536	10917	3487842561	GABA-B-R1,GABA-B-R2
	GO:0030815	negative regulation of cAMP metabolic process	0.00698348	-4.96421	0.09383	3	2	0.00373134	536	10917	3487842561	GABA-B-R1,GABA-B-R2
	GO:0007214	gamma-aminobutyric acid signaling pathway	0.00698348	-4.96421	0.09383	3	2	0.00373134	536	10917	3487842561	GABA-B-R1,GABA-B-R2
	GO:0090207	regulation of triglyceride metabolic process	0.00698348	-4.96421	0.09383	3	2	0.00373134	536	10917	3124537978	Seipin,Atf-2
	GO:0031280	negative regulation of cyclase activity	0.00698348	-4.96421	0.09383	3	2	0.00373134	536	10917	3487842561	GABA-B-R1,GABA-B-R2
	GO:0051350	negative regulation of lyase activity	0.00698348	-4.96421	0.09383	3	2	0.00373134	536	10917	3487842561	GABA-B-R1,GABA-B-R2
	GO:1900372	negative regulation of purine nucleotide biosynthetic process	0.00698348	-4.96421	0.09383	3	2	0.00373134	536	10917	3487842561	GABA-B-R1,GABA-B-R2
	GO:0010557	positive regulation of macromolecule biosynthetic process	0.00706678	-4.95235	0.094736	301	25	0.0466418	536	10917	4.38253e+125	sv,Pph13,sim,ro,Bx,so,retn,mirr,Eip93F,CG32006,eya,onecut,Dip3,mam,gl,Atf-2,pnr,gcm,slp2,lz,tll,NC2alpha,slp1,MTF-1,SoxN
	GO:0051650	establishment of vesicle localization	0.00708391	-4.94993	0.094753	109	12	0.0223881	536	10917	2.49072e+62	Liprin-alpha,comt,Aplip1,stnB,unc-104,Syt4,Caps,Syn,Rab5,Dap160,CASK,Syx13
	GO:0048588	developmental cell growth	0.00753598	-4.88807	0.10058	47	7	0.0130597	536	10917	4.04624e+35	Hem,wnd,Liprin-alpha,Ank2,CadN,RhoGAP100F,Lar
	GO:0050954	sensory perception of mechanical stimulus	0.00764621	-4.87355	0.10182	71	9	0.016791	536	10917	4.05804e+44	rpk,Ank2,DCX-EMAP,Kap3,na,gl,sei,Atpalpha,Tmhs
	GO:0040007	growth	0.00771935	-4.86403	0.10256	181	17	0.0317164	536	10917	4.37583e+85	RhoGAP100F,Dok,CycD,Ank2,sgg,Actbeta,Dap160,Lar,repo,Liprin-alpha,wnd,vari,jeb,Atpalpha,Hem,CadN,Abl
	GO:0048134	germ-line cyst formation	0.00781172	-4.85213	0.10267	26	5	0.00932836	536	10917	4.45434e+24	enc,AGO1,Cbl,alpha-Spec,aret
	GO:0009954	proximal/distal pattern formation	0.00781172	-4.85213	0.10267	26	5	0.00932836	536	10917	4.48563e+24	ru,B-H1,B-H2,Gli,rho
	GO:0050953	sensory perception of light stimulus	0.00781172	-4.85213	0.10267	26	5	0.00932836	536	10917	4.31464e+24	boss,rdgC,inaC,cac,Sdc
	GO:0007523	larval visceral muscle development	0.00791647	-4.83881	0.10267	9	3	0.00559701	536	10917	362583129238067	ths,kirre,klar
	GO:0007418	ventral midline development	0.00791647	-4.83881	0.10267	9	3	0.00559701	536	10917	416124527836555	sim,csw,mam
	GO:0007615	anesthesia-resistant memory	0.00791647	-4.83881	0.10267	9	3	0.00559701	536	10917	359774256742707	brp,CASK,klg
	GO:0045500	sevenless signaling pathway	0.00791647	-4.83881	0.10267	9	3	0.00559701	536	10917	431463832145278	boss,dos,csw
	GO:0090317	negative regulation of intracellular protein transport	0.00791647	-4.83881	0.10267	9	3	0.00559701	536	10917	417043786434719	rdx,tamo,CG9426
	GO:0072347	response to anesthetic	0.00791647	-4.83881	0.10267	9	3	0.00559701	536	10917	312484231045338	sgg,unc79,na
	GO:0050730	regulation of peptidyl-tyrosine phosphorylation	0.00791647	-4.83881	0.10267	9	3	0.00559701	536	10917	4314638961326190	boss,Cbl,Krn
	GO:0046823	negative regulation of nucleocytoplasmic transport	0.00791647	-4.83881	0.10267	9	3	0.00559701	536	10917	417043786434719	rdx,tamo,CG9426
	GO:0007479	leg disc proximal/distal pattern formation	0.00820152	-4.80344	0.10568	17	4	0.00746269	536	10917	4.48563e+19	ru,B-H1,B-H2,rho
	GO:0042493	response to drug	0.00820152	-4.80344	0.10568	17	4	0.00746269	536	10917	3.12484e+19	sgg,unc79,para,na
	GO:0007303	cytoplasmic transport, nurse cell to oocyte	0.00820152	-4.80344	0.10568	17	4	0.00746269	536	10917	3.72015e+19	ena,Abl,qua,loco
	GO:0007552	metamorphosis	0.00826738	-4.79544	0.1063	568	41	0.0764925	536	10917	3.59003e+204	babo,Akap200,Mmp2,l(3)neo38,sgg,Rab5,so,comm3,CG43340,rho,qua,mirr,mthl1,B-H2,CG42674,rap,tmod,aret,spict,Fas2,fw,neur,CG15312,boi,step,Dok,Fhos,CG11382,Cbl,Bx,CG42684,CG14478,Eip93F,eya,Glut4EF,drpr,B-H1,Gli,tow,aos,mam
	GO:0031324	negative regulation of cellular metabolic process	0.00844146	-4.7746	0.10831	402	31	0.0578358	536	10917	3.89634e+157	Unr,Aef1,eIF4E-6,wuc,msi,GABA-B-R1,seq,sgg,aop,Side,Cbl,retn,mirr,pros,GABA-B-R2,CG32006,B-H2,B-H1,AGO1,scrt,crb,aret,elav,toe,pnr,lz,slp2,NC2alpha,slp1,Rsf1,peb
	GO:0008407	chaeta morphogenesis	0.00845943	-4.77247	0.10831	48	7	0.0130597	536	10917	4.48494e+34	pnr,Hem,B-H2,B-H1,sgg,nvy,mam
	GO:0072089	stem cell proliferation	0.00863273	-4.75219	0.11029	60	8	0.0149254	536	10917	3.51974e+39	brat,babo,Gbeta13F,tll,sdt,Apc,pros,loco
	GO:0007472	wing disc morphogenesis	0.00865554	-4.74956	0.11034	354	28	0.0522388	536	10917	3.12293e+139	boi,CG15312,babo,step,Dok,l(3)neo38,CG11382,sgg,Fhos,Bx,Cbl,CG42684,CG14478,CG43340,rho,qua,mirr,mthl1,Glut4EF,tow,Gli,aos,tmod,mam,aret,spict,neur,fw
	GO:0016311	dephosphorylation	0.00874963	-4.73874	0.11131	112	12	0.0223881	536	10917	2.76889e+61	CG42271,eya,mtm,Ipp,CG7115,CG11426,rdgC,Ptp99A,csw,Lar,ssh,CanB
	GO:0010033	response to organic substance	0.00898695	-4.71198	0.11408	307	25	0.0466418	536	10917	3.59003e+126	babo,Akap200,Eip75B,dock,dpr9,ths,Tbh,Bx,csw,para,Ire1,rho,Mio,Ace,Eip93F,AGO1,svp,klg,boss,pnr,tll,Syn,Fas2,inaC,Hsp67Bc
	GO:0051649	establishment of localization in cell	0.00940634	-4.66637	0.11915	641	45	0.0839552	536	10917	41833,32071,32158,39332,36876,40876,36718,5740544,33418,35378,42567,35698,31179,39485,35058,40544,35977,47091,44819,41025,41247,45821,38418,35680,36010,53472,318874,33739,37201,43905,37536,32290,38067,249072,33845,32152,326232,37810,4379834,49968,40124,44642,42672,44317,38491	SIDL,Kap3,cac,Klp68D,unc-104,Syt4,Khc-73,futsch,Rab5,Dap160,CASK,CG43340,Unc-76,Syx13,qua,Syt14,brp,comt,g,p,Syn,Abl,kst,didum,dila,Aplip1,Nnf1b,qtc,ena,syd,Vps35,Syt12,klar,Liprin-alpha,mtm,wisp,Tango5,thoc5,stnB,Caps,CG9279,Apc,loco,CanB,ens
	GO:0019220	regulation of phosphate metabolic process	0.00957206	-4.64891	0.12074	277	23	0.0429104	536	10917	4.18334e+117	SIDL,babo,CG5337,Aplip1,step,GABA-B-R1,CycD,sgg,RhoGAP93B,Cbl,Dap160,GABA-B-R2,Krn,crb,jeb,Ced-12,rdx,boss,RN-tre,Octbeta3R,peb,Src64B,plx
	GO:0051174	regulation of phosphorus metabolic process	0.00957206	-4.64891	0.12074	277	23	0.0429104	536	10917	4.18334e+117	SIDL,babo,CG5337,Aplip1,step,GABA-B-R1,CycD,sgg,RhoGAP93B,Cbl,Dap160,GABA-B-R2,Krn,crb,jeb,Ced-12,rdx,boss,RN-tre,Octbeta3R,peb,Src64B,plx
	GO:0023014	signal transduction by phosphorylation	0.0098456	-4.62073	0.12367	38	6	0.011194	536	10917	3.56463e+30	Gadd45,aop,Aplip1,Src64B,Atf-2,Krn
	GO:0000165	MAPK cascade	0.0098456	-4.62073	0.12367	38	6	0.011194	536	10917	3.56463e+30	Gadd45,aop,Aplip1,Src64B,Atf-2,Krn
	GO:0051146	striated muscle cell differentiation	0.0100095	-4.60422	0.12546	87	10	0.0186567	536	10917	3.10753e+49	DAAM,kirre,dock,rst,Hem,Ced-12,aop,hbs,sty,ens
	GO:0045879	negative regulation of smoothened signaling pathway	0.0101427	-4.591	0.1266	18	4	0.00746269	536	10917	4.17045e+19	rdx,Sulf1,sgg,tow
	GO:0035058	nonmotile primary cilium assembly	0.0101427	-4.591	0.1266	18	4	0.00746269	536	10917	3.17817e+20	CG32006,slp2,slp1,Kap3
	GO:0045934	negative regulation of nucleobase-containing compound metabolic process	0.010385	-4.56739	0.12936	279	23	0.0429104	536	10917	4.03704e+117	Aef1,wuc,GABA-B-R1,seq,aop,Side,retn,mirr,pros,GABA-B-R2,CG32006,B-H2,B-H1,AGO1,scrt,elav,toe,pnr,slp2,lz,NC2alpha,slp1,Rsf1
	GO:0045471	response to ethanol	0.0104772	-4.55856	0.13023	62	8	0.0149254	536	10917	2.76867e+41	dpr9,Tbh,Syn,Akap200,Fas2,inaC,klg,rho
	GO:0032940	secretion by cell	0.0108505	-4.52354	0.13302	158	15	0.0279851	536	10917	3.59775e+77	brp,comt,Tango5,g,cac,stnB,Syt4,Caps,Syn,Dap160,CASK,Syx13,Syt12,CanB,Syt14
	GO:0032387	negative regulation of intracellular transport	0.0109013	-4.51888	0.13302	10	3	0.00559701	536	10917	417043786434719	rdx,tamo,CG9426
	GO:0045744	negative regulation of G-protein coupled receptor protein signaling pathway	0.0109013	-4.51888	0.13302	10	3	0.00559701	536	10917	328743267442672	CG42450,RSG7,loco
	GO:0050962	detection of light stimulus involved in sensory perception	0.0109013	-4.51888	0.13302	10	3	0.00559701	536	10917	368973215837447	inaC,cac,Sdc
	GO:0045186	zonula adherens assembly	0.0109013	-4.51888	0.13302	10	3	0.00559701	536	10917	448614289638418	sdt,crb,kst
	GO:0001748	optic lobe placode development	0.0109013	-4.51888	0.13302	10	3	0.00559701	536	10917	339164365635662	eya,tll,so
	GO:0008069	dorsal/ventral axis specification, ovarian follicular epithelium	0.0109013	-4.51888	0.13302	10	3	0.00559701	536	10917	452783896142672	csw,Cbl,loco
	GO:0023021	termination of signal transduction	0.0109013	-4.51888	0.13302	10	3	0.00559701	536	10917	328743267442672	CG42450,RSG7,loco
	GO:0038032	termination of G-protein coupled receptor signaling pathway	0.0109013	-4.51888	0.13302	10	3	0.00559701	536	10917	328743267442672	CG42450,RSG7,loco
	GO:0035120	post-embryonic appendage morphogenesis	0.0112103	-4.49092	0.13651	394	30	0.0559701	536	10917	3.12293e+149	boi,CG15312,babo,step,Dok,l(3)neo38,CG11382,sgg,Fhos,Rab5,Bx,Cbl,CG42684,CG14478,CG43340,rho,qua,mirr,mthl1,Glut4EF,CG42674,tow,Gli,aos,tmod,mam,aret,spict,neur,fw
	GO:0042692	muscle cell differentiation	0.0112666	-4.48591	0.13692	102	11	0.0205224	536	10917	3.10753e+54	DAAM,kirre,dock,rst,jeb,Hem,Ced-12,aop,hbs,sty,ens
	GO:0051172	negative regulation of nitrogen compound metabolic process	0.0117083	-4.44746	0.14195	282	23	0.0429104	536	10917	4.03704e+117	Aef1,wuc,GABA-B-R1,seq,aop,Side,retn,mirr,pros,GABA-B-R2,CG32006,B-H2,B-H1,AGO1,scrt,elav,toe,pnr,slp2,lz,NC2alpha,slp1,Rsf1
	GO:0033157	regulation of intracellular protein transport	0.0117285	-4.44574	0.14195	51	7	0.0130597	536	10917	4.17043e+34	rdx,sgg,Abl,crb,tamo,CG9426,CanB
	GO:0060249	anatomical structure homeostasis	0.0120751	-4.41661	0.14585	103	11	0.0205224	536	10917	3.67714e+54	SP2353,crb,Csk,Atpalpha,rdgC,Fhos,CG3408,Ank2,Nrk,peb,rho
	GO:0035223	leg disc pattern formation	0.0123584	-4.39342	0.14897	19	4	0.00746269	536	10917	4.48563e+19	ru,B-H1,B-H2,rho
	GO:1990138	neuron projection extension	0.0124991	-4.3821	0.14976	29	5	0.00932836	536	10917	2.49072e+25	Liprin-alpha,Ank2,CadN,RhoGAP100F,Lar
	GO:0051403	stress-activated MAPK cascade	0.0124991	-4.3821	0.14976	29	5	0.00932836	536	10917	3.56463e+24	Gadd45,aop,Aplip1,Src64B,Atf-2
	GO:0048675	axon extension	0.0124991	-4.3821	0.14976	29	5	0.00932836	536	10917	2.49072e+25	Liprin-alpha,Ank2,CadN,RhoGAP100F,Lar
	GO:0046822	regulation of nucleocytoplasmic transport	0.0126068	-4.37352	0.15075	40	6	0.011194	536	10917	4.17043e+29	rdx,sgg,Abl,tamo,CG9426,CanB
	GO:0048149	behavioral response to ethanol	0.012997	-4.34303	0.15511	52	7	0.0130597	536	10917	2.76867e+36	dpr9,Tbh,Syn,Fas2,Akap200,rho,klg
	GO:0036058	filtration diaphragm assembly	0.0135133	-4.30408	0.15538	4	2	0.00373134	536	10917	3129248973	kirre,Src64B
	GO:0001744	optic lobe placode formation	0.0135133	-4.30408	0.15538	4	2	0.00373134	536	10917	3391635662	eya,so
	GO:0042690	negative regulation of crystal cell differentiation	0.0135133	-4.30408	0.15538	4	2	0.00373134	536	10917	3427734280	gcm,gcm2
	GO:0071696	ectodermal placode development	0.0135133	-4.30408	0.15538	4	2	0.00373134	536	10917	3391635662	eya,so
	GO:0071697	ectodermal placode morphogenesis	0.0135133	-4.30408	0.15538	4	2	0.00373134	536	10917	3391635662	eya,so
	GO:0060913	cardiac cell fate determination	0.0135133	-4.30408	0.15538	4	2	0.00373134	536	10917	4484941491	pnr,svp
	GO:0008089	anterograde axon cargo transport	0.0135133	-4.30408	0.15538	4	2	0.00373134	536	10917	3207139332	Kap3,Klp68D
	GO:0007176	regulation of epidermal growth factor-activated receptor activity	0.0135133	-4.30408	0.15538	4	2	0.00373134	536	10917	38961326198	Cbl,Krn
	GO:0008302	female germline ring canal formation, actin assembly	0.0135133	-4.30408	0.15538	4	2	0.00373134	536	10917	3823148973	alpha-Spec,Src64B
	GO:0035202	tracheal pit formation in open tracheal system	0.0135133	-4.30408	0.15538	4	2	0.00373134	536	10917	3816835997	rho,Mmp2
	GO:0015868	purine ribonucleotide transport	0.0135133	-4.30408	0.15538	4	2	0.00373134	536	10917	3127142115	w,sll
	GO:0042480	negative regulation of eye photoreceptor cell development	0.0135133	-4.30408	0.15538	4	2	0.00373134	536	10917	3339253579	aop,Dip3
	GO:0001743	optic placode formation	0.0135133	-4.30408	0.15538	4	2	0.00373134	536	10917	3391635662	eya,so
	GO:0015865	purine nucleotide transport	0.0135133	-4.30408	0.15538	4	2	0.00373134	536	10917	3127142115	w,sll
	GO:0007510	cardioblast cell fate determination	0.0135133	-4.30408	0.15538	4	2	0.00373134	536	10917	4484941491	pnr,svp
	GO:0060788	ectodermal placode formation	0.0135133	-4.30408	0.15538	4	2	0.00373134	536	10917	3391635662	eya,so
	GO:0071470	cellular response to osmotic stress	0.0135133	-4.30408	0.15538	4	2	0.00373134	536	10917	4001437978	grim,Atf-2
	GO:0051048	negative regulation of secretion	0.0135133	-4.30408	0.15538	4	2	0.00373134	536	10917	4028842561	cmpy,GABA-B-R2
	GO:0045316	negative regulation of compound eye photoreceptor development	0.0135133	-4.30408	0.15538	4	2	0.00373134	536	10917	3339253579	aop,Dip3
	GO:0001894	tissue homeostasis	0.0141732	-4.2564	0.16203	41	6	0.011194	536	10917	4.02244e+29	rdgC,crb,rho,peb,Csk,Atpalpha
	GO:0055057	neuroblast division	0.0141732	-4.2564	0.16203	41	6	0.011194	536	10917	3.51974e+29	brat,sdt,tll,Gbeta13F,pros,loco
	GO:0036445	neuronal stem cell division	0.0141732	-4.2564	0.16203	41	6	0.011194	536	10917	3.51974e+29	brat,sdt,tll,Gbeta13F,loco,pros
	GO:0032970	regulation of actin filament-based process	0.0143613	-4.24322	0.16355	53	7	0.0130597	536	10917	3.72014e+34	ena,Fhos,gish,Abl,DAAM,Src64B,ssh
	GO:0032956	regulation of actin cytoskeleton organization	0.0143613	-4.24322	0.16355	53	7	0.0130597	536	10917	3.72014e+34	ena,Fhos,gish,Abl,DAAM,Src64B,ssh
	GO:0030155	regulation of cell adhesion	0.014409	-4.2399	0.16363	30	5	0.00932836	536	10917	3.33924e+24	aop,Fhos,aos,wech,step
	GO:0016201	synaptic target inhibition	0.0144499	-4.23706	0.16363	11	3	0.00559701	536	10917	534373643635037	Sulf1,Drl-2,beat-IIIc
	GO:0048747	muscle fiber development	0.0144499	-4.23706	0.16363	11	3	0.00559701	536	10917	333923842438491	aop,sty,ens
	GO:0046903	secretion	0.0149129	-4.20553	0.16855	164	15	0.0279851	536	10917	3.59775e+77	brp,comt,g,Tango5,cac,stnB,Syt4,Caps,Syn,Dap160,CASK,Syt12,Syx13,CanB,Syt14
	GO:0030111	regulation of Wnt signaling pathway	0.0150187	-4.19846	0.16943	66	8	0.0149254	536	10917	5.34374e+39	Sulf1,ebd1,stan,sgg,aop,Apc,phyl,SoxN
	GO:1902531	regulation of intracellular signal transduction	0.0152627	-4.18234	0.17186	305	24	0.0447761	536	10917	4.18334e+119	SIDL,CG5522,CG5337,Aplip1,MESK2,Akap200,CG7852,step,sgg,aop,dos,RhoGAP93B,CG42684,CG9098,CG5937,CG42674,crb,jeb,Ced-12,rdx,RN-tre,sty,peb,plx
	GO:0010631	epithelial cell migration	0.0155757	-4.16204	0.17472	150	14	0.0261194	536	10917	3.49274e+70	Gli,bbg,Tsp86D,Ced-12,ena,ru,aop,RN-tre,Rab5,Cbl,csw,CASK,Sdc,Krn
	GO:0090132	epithelium migration	0.0155757	-4.16204	0.17472	150	14	0.0261194	536	10917	3.49274e+70	Gli,bbg,Tsp86D,Ced-12,ena,ru,aop,RN-tre,Rab5,Cbl,csw,CASK,Sdc,Krn
	GO:0009611	response to wounding	0.0161764	-4.1242	0.181	80	9	0.016791	536	10917	4.01434e+44	wnd,CG12913,Eig71Ee,mtm,Appl,Mmp2,Fhos,lz,kst
	GO:0006955	immune response	0.0162167	-4.12171	0.181	196	17	0.0317164	536	10917	3.97064e+86	Eig71Ee,PGRP-LC,Eip75B,Cdk5alpha,RhoBTB,DCX-EMAP,dos,eya,bbg,Dip3,Eph,Atf-2,PGRP-LD,CG42339,LysX,IM23,grim
	GO:0033043	regulation of organelle organization	0.0162262	-4.12113	0.181	227	19	0.0354478	536	10917	4.97013e+94	gish,DAAM,step,CG15923,Syt4,ena,sgg,Fhos,GABA-B-R2,Z600,Patronin,alpha-Spec,rap,Jupiter,aret,Atf-2,Abl,Src64B,ssh
	GO:0032386	regulation of intracellular transport	0.0163478	-4.11366	0.18202	67	8	0.0149254	536	10917	4.97014e+39	gish,crb,CG9426,rdx,sgg,Abl,tamo,CanB
	GO:0097305	response to alcohol	0.0167085	-4.09184	0.18569	94	10	0.0186567	536	10917	3.41704e+51	Akap200,Eip75B,klg,dpr9,Tbh,Syn,Fas2,inaC,rho,Eip93F
	GO:0007605	sensory perception of sound	0.017391	-4.0518	0.19291	55	7	0.0130597	536	10917	3.88634e+34	Ank2,DCX-EMAP,Kap3,gl,sei,Atpalpha,Tmhs
	GO:0051058	negative regulation of small GTPase mediated signal transduction	0.0176618	-4.03635	0.19315	21	4	0.00746269	536	10917	3.33923e+19	aop,Akap200,CG42684,sty
	GO:0046580	negative regulation of Ras protein signal transduction	0.0176618	-4.03635	0.19315	21	4	0.00746269	536	10917	3.33923e+19	aop,Akap200,CG42684,sty
	GO:0007614	short-term memory	0.0176618	-4.03635	0.19315	21	4	0.00746269	536	10917	3.59774e+19	brp,Ank2,Fas2,2mit
	GO:0050905	neuromuscular process	0.0176618	-4.03635	0.19315	21	4	0.00746269	536	10917	3.70664e+19	Sema-5c,neur,Atpalpha,Sema-1a
	GO:0045465	R8 cell differentiation	0.0176618	-4.03635	0.19315	21	4	0.00746269	536	10917	3.50704e+21	CadN,ro,sev,seq
	GO:0000768	syncytium formation by plasma membrane fusion	0.0177027	-4.03404	0.19315	43	6	0.011194	536	10917	3.46334e+29	Ced-12,Hem,hbs,kirre,dock,rst
	GO:0030537	larval behavior	0.0177027	-4.03404	0.19315	43	6	0.011194	536	10917	3.17184e+29	Tbh,drpr,betaTub60D,tutl,TBPH,unc-104
	GO:0006949	syncytium formation	0.0177027	-4.03404	0.19315	43	6	0.011194	536	10917	3.46334e+29	Ced-12,Hem,hbs,kirre,dock,rst
	GO:0007520	myoblast fusion	0.0177027	-4.03404	0.19315	43	6	0.011194	536	10917	3.46334e+29	Ced-12,Hem,hbs,kirre,dock,rst
	GO:0001667	ameboidal cell migration	0.0182277	-4.00482	0.19851	153	14	0.0261194	536	10917	3.49274e+70	Gli,bbg,Tsp86D,Ced-12,ena,ru,aop,RN-tre,Rab5,Cbl,csw,CASK,Sdc,Krn
	GO:0030514	negative regulation of BMP signaling pathway	0.0185752	-3.98593	0.20156	12	3	0.00559701	536	10917	346814028832429	spict,cmpy,hiw
	GO:0006821	chloride transport	0.0185752	-3.98593	0.20156	12	3	0.00559701	536	10917	414263107133109	HisCl1,CG3638,tty
	GO:0006726	eye pigment biosynthetic process	0.0187948	-3.97418	0.20358	32	5	0.00932836	536	10917	3.98364e+24	st,g,p,w,ltd
	GO:0033057	multicellular organismal reproductive behavior	0.0190305	-3.96171	0.20563	110	11	0.0205224	536	10917	3.12714e+54	w,tipE,cac,qtc,Tbh,Syn,FoxP,para,CASK,retn,pros
	GO:0042384	cilium assembly	0.0190634	-3.95999	0.20563	56	7	0.0130597	536	10917	3.17817e+35	CG32006,dila,slp2,slp1,Kap3,CG5142,CG15923
	GO:0065009	regulation of molecular function	0.0190876	-3.95872	0.20563	295	23	0.0429104	536	10917	4.18333e+118	SIDL,CG5337,step,GABA-B-R1,CycD,sgg,hbs,RhoGAP93B,Cbl,Dap160,GABA-B-R2,Eip93F,Krn,CG32006,Ced-12,7B2,RN-tre,slp2,slp1,Octbeta3R,Src64B,ens,plx
	GO:0019748	secondary metabolic process	0.0191219	-3.95692	0.20563	96	10	0.0186567	536	10917	4.48193e+49	g,w,Cdk5alpha,Eph,st,RhoBTB,DCX-EMAP,p,grim,ltd
	GO:0051253	negative regulation of RNA metabolic process	0.0200278	-3.91063	0.21469	264	21	0.0391791	536	10917	4.03704e+107	Aef1,wuc,seq,aop,Side,retn,mirr,pros,CG32006,B-H1,B-H2,AGO1,scrt,elav,toe,pnr,slp2,lz,NC2alpha,slp1,Rsf1
	GO:0050790	regulation of catalytic activity	0.020036	-3.91023	0.21469	248	20	0.0373134	536	10917	4.18333e+102	SIDL,CG5337,step,GABA-B-R1,CycD,sgg,hbs,RhoGAP93B,Cbl,Dap160,GABA-B-R2,Krn,Eip93F,Ced-12,RN-tre,7B2,Octbeta3R,Src64B,ens,plx
	GO:0016360	sensory organ precursor cell fate determination	0.0207696	-3.87426	0.22018	22	4	0.00746269	536	10917	3.18834e+19	lz,Tom,phyl,neur
	GO:0060582	cell fate determination involved in pattern specification	0.0207696	-3.87426	0.22018	22	4	0.00746269	536	10917	3.18834e+19	lz,Tom,phyl,neur
	GO:0045433	male courtship behavior, veined wing generated song production	0.0207696	-3.87426	0.22018	22	4	0.00746269	536	10917	4.11823e+19	FoxP,para,tipE,cac
	GO:0009996	negative regulation of cell fate specification	0.0207696	-3.87426	0.22018	22	4	0.00746269	536	10917	3.39163e+19	eya,aop,aos,sty
	GO:0007449	proximal/distal pattern formation, imaginal disc	0.0207696	-3.87426	0.22018	22	4	0.00746269	536	10917	4.48563e+19	ru,B-H1,B-H2,rho
	GO:0010454	negative regulation of cell fate commitment	0.0207696	-3.87426	0.22018	22	4	0.00746269	536	10917	3.39163e+19	eya,aop,aos,sty
	GO:0032504	multicellular organism reproduction	0.0210698	-3.85991	0.22286	1106	69	0.128731	536	10917	32158,3885584,35997,31718,31248,33418,32926,45278,32619,42567,38168,40143,31938,41310,42896,44543,31883,49701,39999,38504,43087,41398,33739,37201,38961,38816,41363,33916,37197,36544,38620,34927,39445,44642,40126,246666,43528,33290,32071,42115,33392,35259,35662,35058,39441,35197,34648,34633,36554,41247,40014,45821,41085,48973,38418,35680,36010,31271,45976,326198,32152,39833,39583,38231,40462,41182…	cac,CG34034,Mmp2,Tbh,sgg,Rab5,out,csw,para,CASK,rho,wnd,Yp2,Tsp86D,crb,enc,lz,gish,Eip75B,tipE,msi,Csk,qtc,ena,Cbl,qm,pros,eya,CG15117,AGO1,blanks,Gli,Klc,Apc,Rcd7,Obp51a,Cad99C,Iris,Kap3,sll,aop,Lar,so,qua,mirr,brat,aret,Ced-12,RN-tre,Syn,grim,Abl,neur,Src64B,kst,didum,dila,w,retn,Krn,wisp,aos,bbg,alpha-Spec,Hem,FoxP,M6,sty,loco
	GO:0050773	regulation of dendrite development	0.0212837	-3.84982	0.22286	33	5	0.00932836	536	10917	3.97174e+24	comm,CadN,tutl,kat-60L1,unc-104
	GO:0060581	cell fate commitment involved in pattern specification	0.0212837	-3.84982	0.22286	33	5	0.00932836	536	10917	3.18834e+24	lz,Tom,phyl,rho,neur
	GO:0008589	regulation of smoothened signaling pathway	0.0212837	-3.84982	0.22286	33	5	0.00932836	536	10917	4.17043e+24	rdx,boi,Sulf1,sgg,tow
	GO:0043324	pigment metabolic process involved in developmental pigmentation	0.0212837	-3.84982	0.22286	33	5	0.00932836	536	10917	3.98364e+24	st,g,p,w,ltd
	GO:0043474	pigment metabolic process involved in pigmentation	0.0212837	-3.84982	0.22286	33	5	0.00932836	536	10917	3.98364e+24	st,g,p,w,ltd
	GO:0042441	eye pigment metabolic process	0.0212837	-3.84982	0.22286	33	5	0.00932836	536	10917	3.98364e+24	st,g,p,w,ltd
	GO:0043085	positive regulation of catalytic activity	0.0217817	-3.82668	0.22312	98	10	0.0186567	536	10917	3.54253e+52	step,Ced-12,hbs,7B2,RhoGAP93B,Octbeta3R,Dap160,Src64B,Krn,Eip93F
	GO:0007498	mesoderm development	0.0217817	-3.82668	0.22312	98	10	0.0186567	536	10917	3.39163e+49	eya,mthl1,mam,CG9509,jeb,ths,pnr,slp1,csw,neur
	GO:0035215	genital disc development	0.0217921	-3.82621	0.22312	45	6	0.011194	536	10917	3.18834e+29	lz,sim,Rab5,aos,Fas2,rho
	GO:0048172	regulation of short-term neuronal synaptic plasticity	0.0217937	-3.82613	0.22312	5	2	0.00373134	536	10917	4709141938	comt,Sap47
	GO:0048678	response to axon injury	0.0217937	-3.82613	0.22312	5	2	0.00373134	536	10917	4014331002	wnd,Appl
	GO:0010469	regulation of receptor activity	0.0217937	-3.82613	0.22312	5	2	0.00373134	536	10917	38961326198	Cbl,Krn
	GO:0040017	positive regulation of locomotion	0.0217937	-3.82613	0.22312	5	2	0.00373134	536	10917	3720139004	ena,Fhos
	GO:0001764	neuron migration	0.0217937	-3.82613	0.22312	5	2	0.00373134	536	10917	4046245821	Hem,Abl
	GO:0045463	R8 cell development	0.0217937	-3.82613	0.22312	5	2	0.00373134	536	10917	350703772396	CadN,seq
	GO:0048789	cytoskeletal matrix organization at active zone	0.0217937	-3.82613	0.22312	5	2	0.00373134	536	10917	3597743758	brp,RhoGAP100F
	GO:0045980	negative regulation of nucleotide metabolic process	0.0217937	-3.82613	0.22312	5	2	0.00373134	536	10917	3487842561	GABA-B-R1,GABA-B-R2
	GO:0050771	negative regulation of axonogenesis	0.0217937	-3.82613	0.22312	5	2	0.00373134	536	10917	413633772396	pros,seq
	GO:0048052	R1/R6 cell differentiation	0.0217937	-3.82613	0.22312	5	2	0.00373134	536	10917	4149136606	svp,phyl
	GO:2000113	negative regulation of cellular macromolecule biosynthetic process	0.0219727	-3.81795	0.22419	299	23	0.0429104	536	10917	3.89634e+117	Unr,Aef1,eIF4E-6,wuc,msi,seq,aop,Side,retn,mirr,pros,CG32006,B-H1,B-H2,AGO1,scrt,aret,toe,pnr,slp2,lz,NC2alpha,slp1
	GO:0010558	negative regulation of macromolecule biosynthetic process	0.0219727	-3.81795	0.22419	299	23	0.0429104	536	10917	3.89634e+117	Unr,Aef1,eIF4E-6,wuc,msi,seq,aop,Side,retn,mirr,pros,CG32006,B-H1,B-H2,AGO1,scrt,aret,toe,pnr,slp2,lz,NC2alpha,slp1
	GO:0044782	cilium organization	0.0227397	-3.78364	0.23119	58	7	0.0130597	536	10917	3.17817e+35	CG32006,dila,slp2,slp1,Kap3,CG15923,CG5142
	GO:0060271	cilium morphogenesis	0.0227397	-3.78364	0.23119	58	7	0.0130597	536	10917	3.17817e+35	CG32006,slp2,dila,Kap3,slp1,CG15923,CG5142
	GO:0007298	border follicle cell migration	0.0227814	-3.78181	0.23119	113	11	0.0205224	536	10917	3.49274e+55	Gli,bbg,Tsp86D,ena,Ced-12,RN-tre,aop,Rab5,Cbl,CASK,Krn
	GO:0035220	wing disc development	0.0228138	-3.78039	0.23119	468	33	0.0615672	536	10917	3.59004e+164	babo,Cad99C,l(3)neo38,sgg,Rab5,rho,mirr,qua,CG43340,mthl1,CG14073,tmod,aret,spict,fw,neur,boi,CG15312,step,Dok,Fhos,CG11382,Bx,Cbl,CG42684,CG14478,Glut4EF,drpr,Gli,tow,aos,mam,peb
	GO:0006470	protein dephosphorylation	0.0231954	-3.7638	0.23466	85	9	0.016791	536	10917	3.39163e+44	eya,mtm,CG7115,rdgC,csw,Ptp99A,Lar,ssh,CanB
	GO:0031345	negative regulation of cell projection organization	0.0232837	-3.76	0.23516	13	3	0.00559701	536	10917	3.50704e+16	CadN,pros,seq
	GO:0042306	regulation of protein import into nucleus	0.0239777	-3.73063	0.24135	34	5	0.00932836	536	10917	4.17043e+24	rdx,sgg,tamo,CG9426,CanB
	GO:0008277	regulation of G-protein coupled receptor protein signaling pathway	0.0239777	-3.73063	0.24135	34	5	0.00932836	536	10917	4.02243e+24	rdgC,CG42450,RSG7,inaC,loco
	GO:0007601	visual perception	0.0241925	-3.72171	0.24229	23	4	0.00746269	536	10917	4.31464e+19	boss,rdgC,cac,Sdc
	GO:0016339	calcium-dependent cell-cell adhesion	0.0241925	-3.72171	0.24229	23	4	0.00746269	536	10917	3.61254e+19	stan,Cad96Cb,CadN,Cad99C
	GO:0016545	male courtship behavior, veined wing vibration	0.0241925	-3.72171	0.24229	23	4	0.00746269	536	10917	4.11823e+19	FoxP,para,tipE,cac
	GO:0035282	segmentation	0.0242948	-3.71749	0.24291	237	19	0.0354478	536	10917	3.56803e+95	didum,sev,sgg,Rab5,Bx,csw,dos,dan,CG32006,stan,brat,AGO1,pnr,gcm,slp2,tll,slp1,sty,peb
	GO:0042440	pigment metabolic process	0.0255657	-3.66651	0.25519	115	11	0.0205224	536	10917	4.48193e+54	g,w,Cdk5alpha,Eph,pnr,st,RhoBTB,DCX-EMAP,grim,p,ltd
	GO:0009892	negative regulation of metabolic process	0.025921	-3.6527	0.2583	490	34	0.0634328	536	10917	4.03704e+172	Aef1,eIF4E-6,wuc,sgg,aop,mirr,rho,GABA-B-R2,B-H2,scrt,crb,aret,toe,pnr,lz,slp2,Unr,msi,GABA-B-R1,seq,Cbl,Side,retn,pros,CG32006,B-H1,blanks,AGO1,elav,NC2alpha,slp1,CG17265,Rsf1,peb
	GO:0006887	exocytosis	0.0261501	-3.6439	0.26015	73	8	0.0149254	536	10917	4.99685e+39	Caps,comt,Syn,g,cac,CASK,Syx13,Syt4
	GO:0022607	cellular component assembly	0.02622	-3.64123	0.26039	719	47	0.0876866	536	10917	43528,32071,35623,31292,36876,43571,41861,31248,35378,35259,35058,47091,40912,42896,36295,39717,33608,37888,48973,41085,38418,38963,36010,31075,34702,42443,34192,44861,41363,47285,317817,249072,35343,42213,33845,31644,32152,36544,34927,50225,34840,48971,40462,34646,33607,42672,38491	Cad99C,Kap3,lbm,kirre,unc-104,Sry-alpha,Sra-1,sgg,Dap160,Lar,qua,comt,CG34127,crb,jeb,comm,slp2,betaTub60D,Src64B,neur,kst,Unr,dila,DAAM,CG5142,CG15923,Sema-1a,sdt,pros,repo,CG32006,Liprin-alpha,vari,cona,mtm,bou,wisp,AGO1,Gli,Prosap,Rab14,Atpalpha,Hem,crok,slp1,loco,ens
	GO:0007507	heart development	0.0262612	-3.63966	0.26039	101	10	0.0186567	536	10917	3.49273e+49	Gli,Gbeta13F,mam,svp,ths,pnr,sgg,betaTub60D,slp1,qm
	GO:0008064	regulation of actin polymerization or depolymerization	0.0268819	-3.6163	0.26523	35	5	0.00932836	536	10917	3.72015e+24	ena,Abl,DAAM,Src64B,ssh
	GO:0030832	regulation of actin filament length	0.0268819	-3.6163	0.26523	35	5	0.00932836	536	10917	3.72015e+24	ena,Abl,DAAM,Src64B,ssh
	GO:0001934	positive regulation of protein phosphorylation	0.0268819	-3.6163	0.26523	35	5	0.00932836	536	10917	3.59004e+25	babo,Dap160,step,Src64B,Krn
	GO:0006909	phagocytosis	0.0272828	-3.6015	0.26796	224	18	0.0335821	536	10917	3.90634e+89	PGRP-LC,CG13284,Sra-1,Bx,csw,pros,CG3638,Unc-76,Eip93F,comt,CG34127,brat,drpr,Rab14,Ced-12,Hem,CG12071,inaC
	GO:0007435	salivary gland morphogenesis	0.0272937	-3.6011	0.26796	146	13	0.0242537	536	10917	3.39164e+64	eya,drpr,Akap200,crb,jeb,Drl-2,Fhos,drl,comm3,retn,rho,Src64B,Eip93F
	GO:0022612	gland morphogenesis	0.0272937	-3.6011	0.26796	146	13	0.0242537	536	10917	3.39164e+64	eya,drpr,Akap200,crb,jeb,Drl-2,Fhos,drl,comm3,retn,rho,Src64B,Eip93F
	GO:0016334	establishment or maintenance of polarity of follicular epithelium	0.0279366	-3.57782	0.27293	24	4	0.00746269	536	10917	4.52784e+19	csw,Cbl,crb,loco
	GO:0048065	male courtship behavior, veined wing extension	0.0279366	-3.57782	0.27293	24	4	0.00746269	536	10917	4.11823e+19	FoxP,para,tipE,cac
	GO:0030866	cortical actin cytoskeleton organization	0.0279366	-3.57782	0.27293	24	4	0.00746269	536	10917	4.04624e+19	Hem,Sra-1,mtm,loco
	GO:0046331	lateral inhibition	0.0283121	-3.56447	0.27393	209	17	0.0317164	536	10917	3.89633e+86	Unr,rst,qtc,Mmp2,sdt,Tsp68C,tutl,CG32206,CASK,tau,phyl,CG32676,B-H2,CG14624,aos,rdx,neur
	GO:0045168	cell-cell signaling involved in cell fate commitment	0.0283121	-3.56447	0.27393	209	17	0.0317164	536	10917	3.89633e+86	Unr,rst,qtc,Mmp2,sdt,Tsp68C,tutl,CG32206,CASK,tau,phyl,CG32676,B-H2,CG14624,aos,rdx,neur
	GO:0044331	cell-cell adhesion mediated by cadherin	0.0285761	-3.55518	0.27393	14	3	0.00559701	536	10917	430333507043528	Cad96Cb,CadN,Cad99C
	GO:0045761	regulation of adenylate cyclase activity	0.0285761	-3.55518	0.27393	14	3	0.00559701	536	10917	3.88557e+16	Octbeta3R,GABA-B-R1,GABA-B-R2
	GO:0030817	regulation of cAMP biosynthetic process	0.0285761	-3.55518	0.27393	14	3	0.00559701	536	10917	3.88557e+16	Octbeta3R,GABA-B-R1,GABA-B-R2
	GO:0007220	Notch receptor processing	0.0285761	-3.55518	0.27393	14	3	0.00559701	536	10917	441294481933418	hbs,g,Rab5
	GO:0007414	axonal defasciculation	0.0285761	-3.55518	0.27393	14	3	0.00559701	536	10917	460153274343469	tutl,RhoGAPp190,Ptp99A
	GO:1901264	carbohydrate derivative transport	0.0285761	-3.55518	0.27393	14	3	0.00559701	536	10917	394613127142115	Ent3,w,sll
	GO:0010324	membrane invagination	0.0285761	-3.55518	0.27393	14	3	0.00559701	536	10917	382184527844936	drpr,csw,Eip93F
	GO:0030814	regulation of cAMP metabolic process	0.0285761	-3.55518	0.27393	14	3	0.00559701	536	10917	3.88557e+16	Octbeta3R,GABA-B-R1,GABA-B-R2
	GO:0006911	phagocytosis, engulfment	0.0285761	-3.55518	0.27393	14	3	0.00559701	536	10917	382184527844936	drpr,csw,Eip93F
	GO:0007617	mating behavior	0.0285887	-3.55474	0.27393	117	11	0.0205224	536	10917	3.12714e+54	w,tipE,cac,qtc,Tbh,Syn,FoxP,para,CASK,retn,pros
	GO:0016333	morphogenesis of follicular epithelium	0.0300009	-3.50653	0.287	36	5	0.00932836	536	10917	4.52784e+24	csw,Cbl,crb,Src64B,loco
	GO:1900542	regulation of purine nucleotide metabolic process	0.0301999	-3.49992	0.28844	89	9	0.016791	536	10917	3.46334e+46	Ced-12,SIDL,RN-tre,CG5337,RhoGAP93B,Octbeta3R,GABA-B-R1,GABA-B-R2,plx
	GO:0007447	imaginal disc pattern formation	0.0313645	-3.46208	0.29557	104	10	0.0186567	536	10917	3.12293e+49	boi,B-H1,B-H2,drpr,CG14073,Cad99C,ru,Apc,rho,peb
	GO:0072359	circulatory system development	0.0313645	-3.46208	0.29557	104	10	0.0186567	536	10917	3.49273e+49	Gli,Gbeta13F,mam,svp,ths,pnr,sgg,betaTub60D,slp1,qm
	GO:0032101	regulation of response to external stimulus	0.0313645	-3.46208	0.29557	104	10	0.0186567	536	10917	2.49072e+50	Liprin-alpha,wisp,PGRP-LC,Sema-1a,pnr,rdgC,CadN,ird1,Lar,inaC
	GO:0072358	cardiovascular system development	0.0313645	-3.46208	0.29557	104	10	0.0186567	536	10917	3.49273e+49	Gli,Gbeta13F,mam,svp,ths,pnr,sgg,betaTub60D,slp1,qm
	GO:0010830	regulation of myotube differentiation	0.0316377	-3.45341	0.29557	6	2	0.00373134	536	10917	3663231292	mspo,kirre
	GO:0060142	regulation of syncytium formation by plasma membrane fusion	0.0316377	-3.45341	0.29557	6	2	0.00373134	536	10917	3663231292	mspo,kirre
	GO:0015858	nucleoside transport	0.0316377	-3.45341	0.29557	6	2	0.00373134	536	10917	3946142115	Ent3,sll
	GO:0050686	negative regulation of mRNA processing	0.0316377	-3.45341	0.29557	6	2	0.00373134	536	10917	3100034370	elav,Rsf1
	GO:0035155	negative regulation of terminal cell fate specification, open tracheal system	0.0316377	-3.45341	0.29557	6	2	0.00373134	536	10917	3339238424	aop,sty
	GO:0042133	neurotransmitter metabolic process	0.0316377	-3.45341	0.29557	6	2	0.00373134	536	10917	3171841625	Tbh,Ace
	GO:0032350	regulation of hormone metabolic process	0.0316377	-3.45341	0.29557	6	2	0.00373134	536	10917	3896139999	Cbl,Eip75B
	GO:1903312	negative regulation of mRNA metabolic process	0.0316377	-3.45341	0.29557	6	2	0.00373134	536	10917	3100034370	elav,Rsf1
	GO:0061097	regulation of protein tyrosine kinase activity	0.0316377	-3.45341	0.29557	6	2	0.00373134	536	10917	38961326198	Cbl,Krn
	GO:1901739	regulation of myoblast fusion	0.0316377	-3.45341	0.29557	6	2	0.00373134	536	10917	3663231292	mspo,kirre
	GO:0007186	G-protein coupled receptor signaling pathway	0.0317928	-3.44851	0.29655	196	16	0.0298507	536	10917	3.61253e+84	stan,mthl1,mthl10,CdsA,Gbeta13F,mtt,Gbeta5,GABA-B-R1,mthl14,boss,7B2,Tbh,Octbeta3R,inaC,GABA-B-R2,CG34384
	GO:0045610	regulation of hemocyte differentiation	0.0320065	-3.44182	0.29808	25	4	0.00746269	536	10917	3.42773e+19	gcm,sgg,aop,gcm2
	GO:0045087	innate immune response	0.032159	-3.43706	0.29903	90	9	0.016791	536	10917	3.39164e+44	eya,Eig71Ee,bbg,PGRP-LC,Cdk5alpha,Eph,RhoBTB,grim,DCX-EMAP
	GO:0043473	pigmentation	0.0323329	-3.43167	0.30018	76	8	0.0149254	536	10917	3.27233e+39	B-H2,B-H1,g,w,sdk,st,p,ltd
	GO:0009953	dorsal/ventral pattern formation	0.0330494	-3.40975	0.30636	150	13	0.0242537	536	10917	3.17817e+65	CG32006,drpr,CG14073,Dip3,sll,slp2,enc,slp1,Cbl,CG32206,csw,loco,peb
	GO:0048069	eye pigmentation	0.0333385	-3.40104	0.30856	37	5	0.00932836	536	10917	3.98364e+24	st,g,p,w,ltd
	GO:1901615	organic hydroxy compound metabolic process	0.0334929	-3.39642	0.30951	135	12	0.0223881	536	10917	4.19974e+59	CG14883,Ipp,Cdk5alpha,Eph,CG9509,Tbh,RhoBTB,DCX-EMAP,grim,CG12398,Eo,Ace
	GO:0048863	stem cell differentiation	0.0335922	-3.39346	0.30995	120	11	0.0205224	536	10917	3.51974e+54	brat,AGO1,mam,svp,aret,msi,pnr,sgg,rho,neur,pros
	GO:0051641	cellular localization	0.0336483	-3.39179	0.30999	767	49	0.0914179	536	10917	41833,32071,32158,39332,36876,40876,36718,5740544,33418,35378,42567,35698,31179,39485,35058,40544,35977,47091,44819,34719,41025,41247,45821,38418,35680,36010,53472,40670,318874,33739,37201,38863,43905,33732,37536,32290,38067,249072,33845,32152,326232,37810,4379834,49968,40124,44642,42672,44317,38491	SIDL,Kap3,cac,Klp68D,unc-104,Syt4,Khc-73,futsch,Rab5,Dap160,CASK,CG43340,Unc-76,Syx13,qua,Syt14,brp,comt,g,CG9426,p,Syn,Abl,kst,didum,dila,Aplip1,Pi4KIIalpha,Nnf1b,qtc,ena,Ank2,syd,CG9121,Vps35,Syt12,klar,Liprin-alpha,mtm,wisp,Tango5,thoc5,stnB,Caps,CG9279,Apc,loco,CanB,ens
	GO:0016055	Wnt signaling pathway	0.0340023	-3.38133	0.31208	63	7	0.0130597	536	10917	3.64364e+34	Drl-2,stan,sgg,gish,Abl,CG32206,kermit
	GO:0006066	alcohol metabolic process	0.0340023	-3.38133	0.31208	63	7	0.0130597	536	10917	3.17184e+34	Tbh,CG14883,CG12398,Eo,Ipp,CG9509,Ace
	GO:0006140	regulation of nucleotide metabolic process	0.0342046	-3.3754	0.31208	91	9	0.016791	536	10917	3.46334e+46	Ced-12,SIDL,RN-tre,CG5337,RhoGAP93B,Octbeta3R,GABA-B-R1,GABA-B-R2,plx
	GO:1900371	regulation of purine nucleotide biosynthetic process	0.0344488	-3.36828	0.31208	15	3	0.00559701	536	10917	3.88557e+16	Octbeta3R,GABA-B-R1,GABA-B-R2
	GO:0030808	regulation of nucleotide biosynthetic process	0.0344488	-3.36828	0.31208	15	3	0.00559701	536	10917	3.88557e+16	Octbeta3R,GABA-B-R1,GABA-B-R2
	GO:0019216	regulation of lipid metabolic process	0.0344488	-3.36828	0.31208	15	3	0.00559701	536	10917	399993124537978	Eip75B,Seipin,Atf-2
	GO:0031279	regulation of cyclase activity	0.0344488	-3.36828	0.31208	15	3	0.00559701	536	10917	3.88557e+16	Octbeta3R,GABA-B-R1,GABA-B-R2
	GO:0050919	negative chemotaxis	0.0344488	-3.36828	0.31208	15	3	0.00559701	536	10917	364365343735037	Drl-2,Sulf1,beat-IIIc
	GO:0030802	regulation of cyclic nucleotide biosynthetic process	0.0344488	-3.36828	0.31208	15	3	0.00559701	536	10917	3.88557e+16	Octbeta3R,GABA-B-R1,GABA-B-R2
	GO:0030799	regulation of cyclic nucleotide metabolic process	0.0344488	-3.36828	0.31208	15	3	0.00559701	536	10917	3.88557e+16	Octbeta3R,GABA-B-R1,GABA-B-R2
	GO:0007266	Rho protein signal transduction	0.0344488	-3.36828	0.31208	15	3	0.00559701	536	10917	352674375832743	CdGAPr,RhoGAP100F,RhoGAPp190
	GO:0048103	somatic stem cell division	0.034677	-3.36168	0.31319	50	6	0.011194	536	10917	3.51974e+29	brat,sdt,tll,Gbeta13F,loco,pros
	GO:0043062	extracellular structure organization	0.034677	-3.36168	0.31319	50	6	0.011194	536	10917	4.35284e+29	Cad99C,alpha-Spec,wus,Src64B,Ppn,Mmp2
	GO:0007297	ovarian follicle cell migration	0.0353897	-3.34133	0.31915	121	11	0.0205224	536	10917	3.49274e+55	Gli,bbg,Tsp86D,ena,Ced-12,RN-tre,aop,Rab5,Cbl,CASK,Krn
	GO:0001932	regulation of protein phosphorylation	0.0363381	-3.31489	0.32634	92	9	0.016791	536	10917	3.25514e+45	CycD,boss,sgg,babo,Cbl,Dap160,step,Src64B,Krn
	GO:0048814	regulation of dendrite morphogenesis	0.0364056	-3.31303	0.32634	26	4	0.00746269	536	10917	3.50705e+19	CadN,tutl,kat-60L1,unc-104
	GO:0045860	positive regulation of protein kinase activity	0.0364056	-3.31303	0.32634	26	4	0.00746269	536	10917	3.53784e+20	Dap160,step,Src64B,Krn
	GO:0033674	positive regulation of kinase activity	0.0364056	-3.31303	0.32634	26	4	0.00746269	536	10917	3.53784e+20	Dap160,step,Src64B,Krn
	GO:0032483	regulation of Rab protein signal transduction	0.036898	-3.2996	0.32947	38	5	0.00932836	536	10917	4.18334e+24	SIDL,RN-tre,CG5337,CG7852,plx
	GO:0044550	secondary metabolite biosynthetic process	0.036898	-3.2996	0.32947	38	5	0.00932836	536	10917	3.98364e+24	st,g,p,w,ltd
	GO:0000003	reproduction	0.0369202	-3.299	0.32947	1232	74	0.13806	536	10917	36401,32158,3885584,35997,31718,31248,33418,32926,45278,32619,42567,38168,40143,31938,41310,42896,31883,44543,49701,39999,38504,43087,41398,33739,37201,38961,38816,41363,33916,42213,37197,36544,34927,38620,37810,39445,44642,40126,246666,43528,33290,32071,42115,33392,35259,35662,35058,39441,39485,35197,34648,37188,34633,36554,40014,41247,45821,41085,48973,38418,35680,36010,31271,45976,326198,32152…	wuc,cac,CG34034,Mmp2,Tbh,sgg,Rab5,out,csw,para,CASK,rho,wnd,Yp2,Tsp86D,crb,lz,enc,gish,Eip75B,tipE,msi,Csk,qtc,ena,Cbl,qm,pros,eya,cona,CG15117,AGO1,Gli,blanks,thoc5,Klc,Apc,Rcd7,Obp51a,Cad99C,Iris,Kap3,sll,aop,Lar,so,qua,mirr,Syx13,brat,aret,Topors,Ced-12,RN-tre,grim,Syn,Abl,neur,Src64B,kst,didum,dila,w,retn,Krn,wisp,aos,bbg,alpha-Spec,Hem,FoxP,M6,sty,loco
	GO:0010605	negative regulation of macromolecule metabolic process	0.0371113	-3.29383	0.33068	452	31	0.0578358	536	10917	3.89634e+157	Unr,Aef1,eIF4E-6,wuc,msi,seq,sgg,aop,Side,Cbl,retn,mirr,pros,rho,CG32006,B-H2,B-H1,AGO1,blanks,scrt,crb,aret,elav,toe,pnr,lz,slp2,NC2alpha,slp1,CG17265,Rsf1
	GO:0032886	regulation of microtubule-based process	0.0377368	-3.27712	0.33576	51	6	0.011194	536	10917	3.69784e+29	Patronin,alpha-Spec,step,CG15923,Jupiter,ens
	GO:0010608	posttranscriptional regulation of gene expression	0.0384901	-3.25735	0.34195	169	14	0.0261194	536	10917	3.89634e+69	Unr,brat,AGO1,blanks,eIF4E-6,crb,aret,msi,rdx,Mlf,Abl,CG17265,fw,Hsp67Bc
	GO:1901700	response to oxygen-containing compound	0.0387411	-3.25085	0.34367	201	16	0.0298507	536	10917	3.41704e+81	Akap200,Eip75B,dock,dpr9,Tbh,Bx,rho,Mio,Ace,Eip93F,klg,boss,Syn,Fas2,inaC,Hsp67Bc
	GO:0044706	multi-multicellular organism process	0.0391857	-3.23944	0.3471	123	11	0.0205224	536	10917	3.12714e+54	w,tipE,cac,qtc,Tbh,Syn,FoxP,para,CASK,retn,pros
	GO:0042592	homeostatic process	0.0395804	-3.22942	0.35008	267	20	0.0373134	536	10917	3.33744e+99	Npc2a,Csk,rdgC,Ank2,CG3408,Fhos,Nrk,rho,Mio,Vha100-1,SP2353,crb,Rab14,Atpalpha,boss,Seipin,MTF-1,CG18130,peb,Sdc
	GO:0036211	protein modification process	0.0403884	-3.20921	0.35287	831	52	0.0970149	536	10917	5740876,35900,32429,32330,34367,39653,34385,40224,31248,45278,41096,35259,36445,42567,42358,40143,36465,37188,34069,42187,36436,41112,41704,45821,37954,36897,48973,41085,49701,37542,39035,32039,41398,37824,43015,43792,44355,43469,38961,37465,39732,33916,33845,34553,36579,38006,43803,33132,39071,44317,42986,36541	CG34452,babo,hiw,CG9941,Ror,FucTA,Cdk5alpha,rdgC,sgg,csw,ird1,Lar,Nrk,CASK,Ire1,wnd,CG4676,Topors,CG7115,CG7156,Drl-2,CG8866,rdx,Abl,CG30421,inaC,Src64B,neur,gish,ari-2,CG5087,sev,Csk,Pask,CG31108,CaMKI,drl,Ptp99A,Cbl,CG10082,sff,eya,mtm,Gyc32E,CG8485,gol,Eph,CG14619,Hsp67Bc,CanB,ssh,CG13344
	GO:0006464	cellular protein modification process	0.0403884	-3.20921	0.35287	831	52	0.0970149	536	10917	5740876,35900,32429,32330,34367,39653,34385,40224,31248,45278,41096,35259,36445,42567,42358,40143,36465,37188,34069,42187,36436,41112,41704,45821,37954,36897,48973,41085,49701,37542,39035,32039,41398,37824,43015,43792,44355,43469,38961,37465,39732,33916,33845,34553,36579,38006,43803,33132,39071,44317,42986,36541	CG34452,babo,hiw,CG9941,Ror,FucTA,Cdk5alpha,rdgC,sgg,csw,ird1,Lar,Nrk,CASK,Ire1,wnd,CG4676,Topors,CG7115,CG7156,Drl-2,CG8866,rdx,Abl,CG30421,inaC,Src64B,neur,gish,ari-2,CG5087,sev,Csk,Pask,CG31108,CaMKI,drl,Ptp99A,Cbl,CG10082,sff,eya,mtm,Gyc32E,CG8485,gol,Eph,CG14619,Hsp67Bc,CanB,ssh,CG13344
	GO:0042045	epithelial fluid transport	0.0408938	-3.19678	0.35287	16	3	0.00559701	536	10917	428963215832683	crb,cac,wus
	GO:0048634	regulation of muscle organ development	0.0408938	-3.19678	0.35287	16	3	0.00559701	536	10917	441293129231290	hbs,kirre,rst
	GO:0007413	axonal fasciculation	0.0408938	-3.19678	0.35287	16	3	0.00559701	536	10917	350703136439873	CadN,Fas2,Nrt
	GO:0060966	regulation of gene silencing by RNA	0.0408938	-3.19678	0.35287	16	3	0.00559701	536	10917	448194102537447	g,p,Sdc
	GO:0001964	startle response	0.0408938	-3.19678	0.35287	16	3	0.00559701	536	10917	370664108534192	Sema-5c,neur,Sema-1a
	GO:0030727	germarium-derived female germ-line cyst formation	0.0408938	-3.19678	0.35287	16	3	0.00559701	536	10917	365443823134648	AGO1,alpha-Spec,aret
	GO:0009649	entrainment of circadian clock	0.0408938	-3.19678	0.35287	16	3	0.00559701	536	10917	312483566242210	sgg,so,gl
	GO:0007464	R3/R4 cell fate commitment	0.0408938	-3.19678	0.35287	16	3	0.00559701	536	10917	361253339241491	stan,aop,svp
	GO:0010959	regulation of metal ion transport	0.0408938	-3.19678	0.35287	16	3	0.00559701	536	10917	379794121538504	NKAIN,Teh1,tipE
	GO:0051339	regulation of lyase activity	0.0408938	-3.19678	0.35287	16	3	0.00559701	536	10917	3.88557e+16	Octbeta3R,GABA-B-R1,GABA-B-R2
	GO:0048854	brain morphogenesis	0.0408938	-3.19678	0.35287	16	3	0.00559701	536	10917	370664108534192	Sema-5c,neur,Sema-1a
	GO:0001558	regulation of cell growth	0.0409637	-3.19507	0.35287	52	6	0.011194	536	10917	3.25512e+32	CycD,Liprin-alpha,cmpy,CadN,Lar,seq
	GO:0042332	gravitaxis	0.0411355	-3.19088	0.35287	27	4	0.00746269	536	10917	3.94003e+21	CG32100,w,shep,CG3857
	GO:0030510	regulation of BMP signaling pathway	0.0411355	-3.19088	0.35287	27	4	0.00746269	536	10917	3.46814e+19	spict,babo,cmpy,hiw
	GO:0046716	muscle cell cellular homeostasis	0.0411355	-3.19088	0.35287	27	4	0.00746269	536	10917	3.91074e+19	CG3408,Fhos,SP2353,Nrk
	GO:0035017	cuticle pattern formation	0.0411355	-3.19088	0.35287	27	4	0.00746269	536	10917	3.12293e+19	boi,sgg,DAAM,Apc
	GO:0009629	response to gravity	0.0411355	-3.19088	0.35287	27	4	0.00746269	536	10917	3.94003e+21	CG32100,w,shep,CG3857
	GO:0009584	detection of visible light	0.0411355	-3.19088	0.35287	27	4	0.00746269	536	10917	4.39504e+19	CdsA,inaC,cac,Sdc
	GO:0009612	response to mechanical stimulus	0.0411355	-3.19088	0.35287	27	4	0.00746269	536	10917	4.97015e+19	gish,tutl,para,Atpalpha
	GO:0035272	exocrine system development	0.0418476	-3.17372	0.35626	171	14	0.0261194	536	10917	3.39164e+69	eya,drpr,unc-5,Akap200,crb,jeb,Drl-2,Fhos,drl,comm3,retn,rho,Src64B,Eip93F
	GO:0007431	salivary gland development	0.0418476	-3.17372	0.35626	171	14	0.0261194	536	10917	3.39164e+69	eya,drpr,unc-5,Akap200,crb,jeb,Drl-2,Fhos,drl,comm3,retn,rho,Src64B,Eip93F
	GO:0017145	stem cell division	0.0420306	-3.16936	0.35626	80	8	0.0149254	536	10917	3.51973e+39	brat,Gbeta13F,aret,msi,tll,sdt,pros,loco
	GO:0007270	neuron-neuron synaptic transmission	0.0428724	-3.14953	0.35626	7	2	0.00373134	536	10917	4996841491	Caps,svp
	GO:0009642	response to light intensity	0.0428724	-3.14953	0.35626	7	2	0.00373134	536	10917	3689735620	inaC,Tsp42Ej
	GO:0051013	microtubule severing	0.0428724	-3.14953	0.35626	7	2	0.00373134	536	10917	4071536978	kat-60L1,Patronin
	GO:0060967	negative regulation of gene silencing by RNA	0.0428724	-3.14953	0.35626	7	2	0.00373134	536	10917	4481941025	g,p
	GO:0040036	regulation of fibroblast growth factor receptor signaling pathway	0.0428724	-3.14953	0.35626	7	2	0.00373134	536	10917	3842435997	sty,Mmp2
	GO:0045678	positive regulation of R7 cell differentiation	0.0428724	-3.14953	0.35626	7	2	0.00373134	536	10917	3339232039	aop,sev
	GO:0050908	detection of light stimulus involved in visual perception	0.0428724	-3.14953	0.35626	7	2	0.00373134	536	10917	3215837447	cac,Sdc
	GO:0046890	regulation of lipid biosynthetic process	0.0428724	-3.14953	0.35626	7	2	0.00373134	536	10917	3124537978	Seipin,Atf-2
	GO:0045851	pH reduction	0.0428724	-3.14953	0.35626	7	2	0.00373134	536	10917	4344234840	Vha100-1,Rab14
	GO:0051452	intracellular pH reduction	0.0428724	-3.14953	0.35626	7	2	0.00373134	536	10917	4344234840	Vha100-1,Rab14
	GO:1900074	negative regulation of neuromuscular synaptic transmission	0.0428724	-3.14953	0.35626	7	2	0.00373134	536	10917	3886336295	Ank2,jeb
	GO:0042689	regulation of crystal cell differentiation	0.0428724	-3.14953	0.35626	7	2	0.00373134	536	10917	3427734280	gcm,gcm2
	GO:0042684	cardioblast cell fate commitment	0.0428724	-3.14953	0.35626	7	2	0.00373134	536	10917	4484941491	pnr,svp
	GO:0071495	cellular response to endogenous stimulus	0.0432808	-3.14005	0.35626	95	9	0.016791	536	10917	4.48494e+44	pnr,ths,babo,tll,csw,Eip75B,dock,svp,Eip93F
	GO:0002164	larval development	0.0435898	-3.13293	0.35626	110	10	0.0186567	536	10917	3.39164e+49	eya,alpha-Spec,kirre,gcm,ths,lz,sgg,Apc,rho,klar
	GO:0009719	response to endogenous stimulus	0.0444661	-3.11303	0.35626	141	12	0.0223881	536	10917	3.59004e+59	babo,Eip75B,dock,svp,ths,pnr,tll,Bx,csw,Hsp67Bc,Eip93F,Ace
	GO:0090092	regulation of transmembrane receptor protein serine/threonine kinase signaling pathway	0.0446929	-3.10794	0.35626	40	5	0.00932836	536	10917	5.34373e+24	Sulf1,spict,babo,cmpy,hiw
	GO:0055059	asymmetric neuroblast division	0.0446929	-3.10794	0.35626	40	5	0.00932836	536	10917	3.51974e+24	brat,sdt,Gbeta13F,pros,loco
	GO:0035010	encapsulation of foreign target	0.0446929	-3.10794	0.35626	40	5	0.00932836	536	10917	4.02494e+24	RhoBTB,alpha-Man-IIb,DCX-EMAP,Cdk5alpha,Eph
	GO:0044705	multi-organism reproductive behavior	0.0453971	-3.09231	0.35626	126	11	0.0205224	536	10917	3.12714e+54	w,tipE,cac,qtc,Tbh,Syn,FoxP,para,CASK,retn,pros
	GO:0045892	negative regulation of transcription, DNA-templated	0.0460522	-3.07798	0.35626	255	19	0.0354478	536	10917	4.03704e+97	Aef1,wuc,seq,aop,Side,retn,mirr,pros,CG32006,B-H1,B-H2,AGO1,scrt,toe,pnr,slp2,lz,NC2alpha,slp1
	GO:1902679	negative regulation of RNA biosynthetic process	0.0460522	-3.07798	0.35626	255	19	0.0354478	536	10917	4.03704e+97	Aef1,wuc,seq,aop,Side,retn,mirr,pros,CG32006,B-H1,B-H2,AGO1,scrt,toe,pnr,slp2,lz,NC2alpha,slp1
	GO:0008345	larval locomotory behavior	0.0461967	-3.07485	0.35626	28	4	0.00746269	536	10917	3.17184e+19	Tbh,drpr,TBPH,unc-104
	GO:0051347	positive regulation of transferase activity	0.0461967	-3.07485	0.35626	28	4	0.00746269	536	10917	3.53784e+20	Dap160,step,Src64B,Krn
	GO:0007254	JNK cascade	0.0461967	-3.07485	0.35626	28	4	0.00746269	536	10917	3.56463e+19	Gadd45,aop,Aplip1,Src64B
	GO:0045455	ecdysteroid metabolic process	0.0461967	-3.07485	0.35626	28	4	0.00746269	536	10917	3.33743e+19	Npc2a,CG12398,Eo,CG9509
	GO:0030178	negative regulation of Wnt signaling pathway	0.0461967	-3.07485	0.35626	28	4	0.00746269	536	10917	3.61253e+19	stan,sgg,aop,Apc
	GO:0035287	head segmentation	0.0461967	-3.07485	0.35626	28	4	0.00746269	536	10917	3.42773e+20	gcm,CG32006,slp2,slp1
	GO:0010669	epithelial structure maintenance	0.0478992	-3.03866	0.35626	17	3	0.00559701	536	10917	381683139141398	rho,peb,Csk
	GO:0003015	heart process	0.0478992	-3.03866	0.35626	17	3	0.00559701	536	10917	448494485642672	pnr,ru,loco
	GO:0003013	circulatory system process	0.0478992	-3.03866	0.35626	17	3	0.00559701	536	10917	448494485642672	pnr,ru,loco
	GO:0051299	centrosome separation	0.0478992	-3.03866	0.35626	17	3	0.00559701	536	10917	401263718838491	Rcd7,Topors,ens
	GO:0048056	R3/R4 cell differentiation	0.0478992	-3.03866	0.35626	17	3	0.00559701	536	10917	361253339241491	stan,aop,svp
	GO:1900073	regulation of neuromuscular synaptic transmission	0.0478992	-3.03866	0.35626	17	3	0.00559701	536	10917	388634256736295	Ank2,CASK,jeb
	GO:0007370	ventral furrow formation	0.0478992	-3.03866	0.35626	17	3	0.00559701	536	10917	396734582143235	Z600,Abl,T48
	GO:0017148	negative regulation of translation	0.0489317	-3.01733	0.35626	41	5	0.00932836	536	10917	3.89634e+24	Unr,AGO1,eIF4E-6,aret,msi
	GO:0046963	3'-phosphoadenosine 5'-phosphosulfate transport	0.0490977	-3.01394	0.35626	1	1	0.00186567	536	10917	42115	sll
	GO:2000574	regulation of microtubule motor activity	0.0490977	-3.01394	0.35626	1	1	0.00186567	536	10917	38491	ens
	GO:0046681	response to carbamate	0.0490977	-3.01394	0.35626	1	1	0.00186567	536	10917	41625	Ace
	GO:0016189	synaptic vesicle to endosome fusion	0.0490977	-3.01394	0.35626	1	1	0.00186567	536	10917	33418	Rab5
	GO:0045103	intermediate filament-based process	0.0490977	-3.01394	0.35626	1	1	0.00186567	536	10917	5740544	futsch
	GO:2001285	negative regulation of BMP secretion	0.0490977	-3.01394	0.35626	1	1	0.00186567	536	10917	40288	cmpy
	GO:0045218	zonula adherens maintenance	0.0490977	-3.01394	0.35626	1	1	0.00186567	536	10917	42896	crb
	GO:0043059	regulation of forward locomotion	0.0490977	-3.01394	0.35626	1	1	0.00186567	536	10917	31718	Tbh
	GO:0032530	regulation of microvillus organization	0.0490977	-3.01394	0.35626	1	1	0.00186567	536	10917	43528	Cad99C
	GO:0045685	regulation of glial cell differentiation	0.0490977	-3.01394	0.35626	1	1	0.00186567	536	10917	34277	gcm
	GO:0032252	secretory granule localization	0.0490977	-3.01394	0.35626	1	1	0.00186567	536	10917	40670	Pi4KIIalpha
	GO:0001507	acetylcholine catabolic process in synaptic cleft	0.0490977	-3.01394	0.35626	1	1	0.00186567	536	10917	41625	Ace
	GO:0016188	synaptic vesicle maturation	0.0490977	-3.01394	0.35626	1	1	0.00186567	536	10917	36876	unc-104
	GO:1900024	regulation of substrate adhesion-dependent cell spreading	0.0490977	-3.01394	0.35626	1	1	0.00186567	536	10917	39004	Fhos
	GO:0061336	cell morphogenesis involved in Malpighian tubule morphogenesis	0.0490977	-3.01394	0.35626	1	1	0.00186567	536	10917	42896	crb
	GO:0060298	positive regulation of sarcomere organization	0.0490977	-3.01394	0.35626	1	1	0.00186567	536	10917	31075	DAAM
	GO:0042426	choline catabolic process	0.0490977	-3.01394	0.35626	1	1	0.00186567	536	10917	41625	Ace
	GO:0047496	vesicle transport along microtubule	0.0490977	-3.01394	0.35626	1	1	0.00186567	536	10917	36876	unc-104
	GO:0034214	protein hexamerization	0.0490977	-3.01394	0.35626	1	1	0.00186567	536	10917	47091	comt
	GO:0090383	phagosome acidification	0.0490977	-3.01394	0.35626	1	1	0.00186567	536	10917	34840	Rab14
	GO:0060385	axonogenesis involved in innervation	0.0490977	-3.01394	0.35626	1	1	0.00186567	536	10917	41363	pros
	GO:0019695	choline metabolic process	0.0490977	-3.01394	0.35626	1	1	0.00186567	536	10917	41625	Ace
	GO:0003402	planar cell polarity pathway involved in axis elongation	0.0490977	-3.01394	0.35626	1	1	0.00186567	536	10917	45821	Abl
	GO:1903054	negative regulation of extracellular matrix organization	0.0490977	-3.01394	0.35626	1	1	0.00186567	536	10917	33022	obst-A
	GO:0010770	positive regulation of cell morphogenesis involved in differentiation	0.0490977	-3.01394	0.35626	1	1	0.00186567	536	10917	39004	Fhos
	GO:0010716	negative regulation of extracellular matrix disassembly	0.0490977	-3.01394	0.35626	1	1	0.00186567	536	10917	33022	obst-A
	GO:0031631	negative regulation of synaptic vesicle fusion to presynaptic membrane	0.0490977	-3.01394	0.35626	1	1	0.00186567	536	10917	42561	GABA-B-R2
	GO:0016338	calcium-independent cell-cell adhesion	0.0490977	-3.01394	0.35626	1	1	0.00186567	536	10917	42025	Fas1
	GO:1900026	positive regulation of substrate adhesion-dependent cell spreading	0.0490977	-3.01394	0.35626	1	1	0.00186567	536	10917	39004	Fhos
	GO:0071484	cellular response to light intensity	0.0490977	-3.01394	0.35626	1	1	0.00186567	536	10917	35620	Tsp42Ej
	GO:0071486	cellular response to high light intensity	0.0490977	-3.01394	0.35626	1	1	0.00186567	536	10917	35620	Tsp42Ej
	GO:0006581	acetylcholine catabolic process	0.0490977	-3.01394	0.35626	1	1	0.00186567	536	10917	41625	Ace
	GO:0019218	regulation of steroid metabolic process	0.0490977	-3.01394	0.35626	1	1	0.00186567	536	10917	39999	Eip75B
	GO:0036466	synaptic vesicle recycling via endosome	0.0490977	-3.01394	0.35626	1	1	0.00186567	536	10917	33418	Rab5
	GO:0035279	mRNA cleavage involved in gene silencing by miRNA	0.0490977	-3.01394	0.35626	1	1	0.00186567	536	10917	36544	AGO1
	GO:0046827	positive regulation of protein export from nucleus	0.0490977	-3.01394	0.35626	1	1	0.00186567	536	10917	45821	Abl
	GO:0046684	response to pyrethroid	0.0490977	-3.01394	0.35626	1	1	0.00186567	536	10917	32619	para
	GO:0016024	CDP-diacylglycerol biosynthetic process	0.0490977	-3.01394	0.35626	1	1	0.00186567	536	10917	43950	CdsA
	GO:0010866	regulation of triglyceride biosynthetic process	0.0490977	-3.01394	0.35626	1	1	0.00186567	536	10917	37978	Atf-2
	GO:0032536	regulation of cell projection size	0.0490977	-3.01394	0.35626	1	1	0.00186567	536	10917	43528	Cad99C
	GO:0038056	negative regulation of BMP signaling pathway by negative regulation of BMP secretion	0.0490977	-3.01394	0.35626	1	1	0.00186567	536	10917	40288	cmpy
	GO:0033632	regulation of cell-cell adhesion mediated by integrin	0.0490977	-3.01394	0.35626	1	1	0.00186567	536	10917	44653	wech
	GO:0031339	negative regulation of vesicle fusion	0.0490977	-3.01394	0.35626	1	1	0.00186567	536	10917	42561	GABA-B-R2
	GO:0070729	cyclic nucleotide transport	0.0490977	-3.01394	0.35626	1	1	0.00186567	536	10917	31271	w
	GO:0070055	HAC1-type intron splice site recognition and cleavage	0.0490977	-3.01394	0.35626	1	1	0.00186567	536	10917	42358	Ire1
	GO:0070731	cGMP transport	0.0490977	-3.01394	0.35626	1	1	0.00186567	536	10917	31271	w
	GO:0070054	mRNA splicing, via endonucleolytic cleavage and ligation	0.0490977	-3.01394	0.35626	1	1	0.00186567	536	10917	42358	Ire1
	GO:0003401	axis elongation	0.0490977	-3.01394	0.35626	1	1	0.00186567	536	10917	45821	Abl
	GO:2000273	positive regulation of receptor activity	0.0490977	-3.01394	0.35626	1	1	0.00186567	536	10917	326198	Krn
	GO:0031630	regulation of synaptic vesicle fusion to presynaptic membrane	0.0490977	-3.01394	0.35626	1	1	0.00186567	536	10917	42561	GABA-B-R2
	GO:0010715	regulation of extracellular matrix disassembly	0.0490977	-3.01394	0.35626	1	1	0.00186567	536	10917	33022	obst-A
	GO:0008628	hormone-mediated apoptotic signaling pathway	0.0490977	-3.01394	0.35626	1	1	0.00186567	536	10917	44936	Eip93F
	GO:0090278	negative regulation of peptide hormone secretion	0.0490977	-3.01394	0.35626	1	1	0.00186567	536	10917	42561	GABA-B-R2
	GO:0048054	R2/R5 cell differentiation	0.0490977	-3.01394	0.35626	1	1	0.00186567	536	10917	43234	ro
	GO:0046341	CDP-diacylglycerol metabolic process	0.0490977	-3.01394	0.35626	1	1	0.00186567	536	10917	43950	CdsA
	GO:0032533	regulation of follicle cell microvillus length	0.0490977	-3.01394	0.35626	1	1	0.00186567	536	10917	43528	Cad99C
	GO:0007463	R2/R5 cell fate commitment	0.0490977	-3.01394	0.35626	1	1	0.00186567	536	10917	43234	ro
	GO:0007130	synaptonemal complex assembly	0.0490977	-3.01394	0.35626	1	1	0.00186567	536	10917	42213	cona
	GO:0060393	regulation of pathway-restricted SMAD protein phosphorylation	0.0490977	-3.01394	0.35626	1	1	0.00186567	536	10917	35900	babo
	GO:0010811	positive regulation of cell-substrate adhesion	0.0490977	-3.01394	0.35626	1	1	0.00186567	536	10917	39004	Fhos
	GO:0097107	postsynaptic density assembly	0.0490977	-3.01394	0.35626	1	1	0.00186567	536	10917	50225	Prosap
	GO:0032532	regulation of microvillus length	0.0490977	-3.01394	0.35626	1	1	0.00186567	536	10917	43528	Cad99C
	GO:0035169	lymph gland plasmatocyte differentiation	0.0490977	-3.01394	0.35626	1	1	0.00186567	536	10917	34277	gcm
	GO:0010862	positive regulation of pathway-restricted SMAD protein phosphorylation	0.0490977	-3.01394	0.35626	1	1	0.00186567	536	10917	35900	babo
	GO:0045687	positive regulation of glial cell differentiation	0.0490977	-3.01394	0.35626	1	1	0.00186567	536	10917	34277	gcm
	GO:0002792	negative regulation of peptide secretion	0.0490977	-3.01394	0.35626	1	1	0.00186567	536	10917	42561	GABA-B-R2
	GO:0060052	neurofilament cytoskeleton organization	0.0490977	-3.01394	0.35626	1	1	0.00186567	536	10917	5740544	futsch
	GO:0015693	magnesium ion transport	0.0490977	-3.01394	0.35626	1	1	0.00186567	536	10917	34681	spict
	GO:0071689	muscle thin filament assembly	0.0490977	-3.01394	0.35626	1	1	0.00186567	536	10917	31075	DAAM
	GO:0006589	octopamine biosynthetic process	0.0490977	-3.01394	0.35626	1	1	0.00186567	536	10917	31718	Tbh
	GO:0070829	heterochromatin maintenance	0.0490977	-3.01394	0.35626	1	1	0.00186567	536	10917	37978	Atf-2
	GO:0046888	negative regulation of hormone secretion	0.0490977	-3.01394	0.35626	1	1	0.00186567	536	10917	42561	GABA-B-R2
	GO:0032531	regulation of follicle cell microvillus organization	0.0490977	-3.01394	0.35626	1	1	0.00186567	536	10917	43528	Cad99C
	GO:0015889	cobalamin transport	0.0490977	-3.01394	0.35626	1	1	0.00186567	536	10917	31380	CG3556
	GO:0009644	response to high light intensity	0.0490977	-3.01394	0.35626	1	1	0.00186567	536	10917	35620	Tsp42Ej
	GO:0046676	negative regulation of insulin secretion	0.0490977	-3.01394	0.35626	1	1	0.00186567	536	10917	42561	GABA-B-R2
	GO:0071927	octopamine signaling pathway	0.0490977	-3.01394	0.35626	1	1	0.00186567	536	10917	31718	Tbh
	GO:0007553	regulation of ecdysteroid metabolic process	0.0490977	-3.01394	0.35626	1	1	0.00186567	536	10917	39999	Eip75B
	GO:0045680	negative regulation of R8 cell differentiation	0.0490977	-3.01394	0.35626	1	1	0.00186567	536	10917	43234	ro
	GO:0010826	negative regulation of centrosome duplication	0.0490977	-3.01394	0.35626	1	1	0.00186567	536	10917	42443	CG15923
	GO:0045104	intermediate filament cytoskeleton organization	0.0490977	-3.01394	0.35626	1	1	0.00186567	536	10917	5740544	futsch
	GO:0044246	regulation of multicellular organismal metabolic process	0.0490977	-3.01394	0.35626	1	1	0.00186567	536	10917	37447	Sdc
	GO:0035314	scab formation	0.0490977	-3.01394	0.35626	1	1	0.00186567	536	10917	31883	lz
	GO:0050931	pigment cell differentiation	0.0490977	-3.01394	0.35626	1	1	0.00186567	536	10917	31017	sdk
	GO:0048057	R3/R4 development	0.0490977	-3.01394	0.35626	1	1	0.00186567	536	10917	36125	stan
	GO:0045679	regulation of R8 cell differentiation	0.0490977	-3.01394	0.35626	1	1	0.00186567	536	10917	43234	ro
	GO:0038005	peptide bond cleavage involved in epidermal growth factor receptor ligand maturation	0.0490977	-3.01394	0.35626	1	1	0.00186567	536	10917	38168	rho
	GO:0045741	positive regulation of epidermal growth factor-activated receptor activity	0.0490977	-3.01394	0.35626	1	1	0.00186567	536	10917	326198	Krn
	GO:0042325	regulation of phosphorylation	0.0491748	-3.01237	0.35638	175	14	0.0261194	536	10917	3.59005e+70	babo,Aplip1,crb,step,jeb,rdx,boss,CycD,sgg,Cbl,Dap160,Src64B,peb,Krn
	GO:0019098	reproductive behavior	0.0498936	-2.99786	0.36116	128	11	0.0205224	536	10917	3.12714e+54	w,tipE,cac,qtc,Tbh,Syn,FoxP,para,CASK,retn,pros
	GO:0044093	positive regulation of molecular function	0.0507752	-2.98035	0.36709	113	10	0.0186567	536	10917	3.54253e+52	step,Ced-12,hbs,7B2,RhoGAP93B,Octbeta3R,Dap160,Src64B,Krn,Eip93F
	GO:0009755	hormone-mediated signaling pathway	0.0515884	-2.96446	0.37218	29	4	0.00746269	536	10917	4.36564e+19	tll,Eip75B,svp,Eip93F
	GO:0002252	immune effector process	0.0516657	-2.96296	0.37218	55	6	0.011194	536	10917	4.02494e+29	RhoBTB,alpha-Man-IIb,DCX-EMAP,PGRP-LC,Cdk5alpha,Eph
	GO:0009583	detection of light stimulus	0.0516657	-2.96296	0.37218	55	6	0.011194	536	10917	4.04714e+29	CG11426,rdgC,CdsA,inaC,cac,Sdc
	GO:0035006	melanization defense response	0.0533995	-2.92995	0.38421	42	5	0.00932836	536	10917	4.02494e+24	RhoBTB,DCX-EMAP,grim,Cdk5alpha,Eph
	GO:0046486	glycerolipid metabolic process	0.0534836	-2.92838	0.38435	84	8	0.0149254	536	10917	2.76889e+41	CG42271,CdsA,Pi4KIIalpha,Ipp,CG10082,Seipin,dob,PIP5K59B
	GO:0030029	actin filament-based process	0.0547695	-2.90462	0.38686	227	17	0.0317164	536	10917	3.56803e+84	didum,Gbeta13F,DAAM,Sry-alpha,ena,Sra-1,CG3618,qua,mthl1,mtm,alpha-Spec,gukh,Hem,Ced-12,Src64B,loco,ssh
	GO:0072384	organelle transport along microtubule	0.0553379	-2.8943	0.38686	8	2	0.00373134	536	10917	3568036876	didum,unc-104
	GO:0070593	dendrite self-avoidance	0.0553379	-2.8943	0.38686	8	2	0.00373134	536	10917	3612546015	stan,tutl
	GO:0030641	regulation of cellular pH	0.0553379	-2.8943	0.38686	8	2	0.00373134	536	10917	4344234840	Vha100-1,Rab14
	GO:0009309	amine biosynthetic process	0.0553379	-2.8943	0.38686	8	2	0.00373134	536	10917	3171831271	Tbh,w
	GO:0019722	calcium-mediated signaling	0.0553379	-2.8943	0.38686	8	2	0.00373134	536	10917	4022436897	rdgC,inaC
	GO:0032855	positive regulation of Rac GTPase activity	0.0553379	-2.8943	0.38686	8	2	0.00373134	536	10917	3463342496	Ced-12,RhoGAP93B
	GO:2000178	negative regulation of neural precursor cell proliferation	0.0553379	-2.8943	0.38686	8	2	0.00373134	536	10917	3519741363	brat,pros
	GO:0048047	mating behavior, sex discrimination	0.0553379	-2.8943	0.38686	8	2	0.00373134	536	10917	3171833739	Tbh,qtc
	GO:0048168	regulation of neuronal synaptic plasticity	0.0553379	-2.8943	0.38686	8	2	0.00373134	536	10917	4709141938	comt,Sap47
	GO:0007406	negative regulation of neuroblast proliferation	0.0553379	-2.8943	0.38686	8	2	0.00373134	536	10917	3519741363	brat,pros
	GO:0022408	negative regulation of cell-cell adhesion	0.0553379	-2.8943	0.38686	8	2	0.00373134	536	10917	3339239833	aop,aos
	GO:0030004	cellular monovalent inorganic cation homeostasis	0.0553379	-2.8943	0.38686	8	2	0.00373134	536	10917	4344234840	Vha100-1,Rab14
	GO:0051453	regulation of intracellular pH	0.0553379	-2.8943	0.38686	8	2	0.00373134	536	10917	4344234840	Vha100-1,Rab14
	GO:0060232	delamination	0.0553379	-2.8943	0.38686	8	2	0.00373134	536	10917	3339239833	aop,aos
	GO:0042401	cellular biogenic amine biosynthetic process	0.0553379	-2.8943	0.38686	8	2	0.00373134	536	10917	3171831271	Tbh,w
	GO:0043052	thermotaxis	0.0554505	-2.89226	0.38686	18	3	0.00559701	536	10917	402244142643950	rdgC,HisCl1,CdsA
	GO:0043401	steroid hormone mediated signaling pathway	0.0554505	-2.89226	0.38686	18	3	0.00559701	536	10917	436563999941491	tll,Eip75B,svp
	GO:0048135	female germ-line cyst formation	0.0554505	-2.89226	0.38686	18	3	0.00559701	536	10917	365443823134648	AGO1,alpha-Spec,aret
	GO:0048545	response to steroid hormone	0.0554505	-2.89226	0.38686	18	3	0.00559701	536	10917	436563999941491	tll,Eip75B,svp
	GO:0015748	organophosphate ester transport	0.0554505	-2.89226	0.38686	18	3	0.00559701	536	10917	364883127142115	CG42321,w,sll
	GO:1901215	negative regulation of neuron death	0.0554505	-2.89226	0.38686	18	3	0.00559701	536	10917	5.74054e+16	futsch,grim,Appl
	GO:0090287	regulation of cellular response to growth factor stimulus	0.0554505	-2.89226	0.38686	18	3	0.00559701	536	10917	534373842435997	Sulf1,sty,Mmp2
	GO:0007380	specification of segmental identity, head	0.0554505	-2.89226	0.38686	18	3	0.00559701	536	10917	3178173360833600	CG32006,slp2,slp1
	GO:0071383	cellular response to steroid hormone stimulus	0.0554505	-2.89226	0.38686	18	3	0.00559701	536	10917	436563999941491	tll,Eip75B,svp
	GO:0009880	embryonic pattern specification	0.0558105	-2.88579	0.38892	211	16	0.0298507	536	10917	3.56803e+80	didum,sev,sgg,csw,dos,retn,CG32006,stan,AGO1,pnr,gcm,slp2,tll,slp1,sty,peb
	GO:0051050	positive regulation of transport	0.0566305	-2.87121	0.3935	85	8	0.0149254	536	10917	4.70914e+39	comt,Syt4,ru,comm,Abl,CASK,corn,CanB
	GO:0007350	blastoderm segmentation	0.0566887	-2.87018	0.3935	195	15	0.0279851	536	10917	3.61253e+75	stan,CG32006,didum,AGO1,sev,gcm,pnr,slp2,sgg,tll,slp1,csw,dos,sty,peb
	GO:0045937	positive regulation of phosphate metabolic process	0.0567309	-2.86944	0.3935	100	9	0.016791	536	10917	3.59004e+47	babo,crb,step,jeb,rdx,Octbeta3R,Dap160,Src64B,Krn
	GO:0010562	positive regulation of phosphorus metabolic process	0.0567309	-2.86944	0.3935	100	9	0.016791	536	10917	3.59004e+47	babo,crb,step,jeb,rdx,Octbeta3R,Dap160,Src64B,Krn
	GO:0032313	regulation of Rab GTPase activity	0.0573083	-2.85931	0.39658	30	4	0.00746269	536	10917	4.18334e+19	SIDL,RN-tre,CG5337,plx
	GO:0035011	melanotic encapsulation of foreign target	0.0573083	-2.85931	0.39658	30	4	0.00746269	536	10917	4.02494e+19	RhoBTB,DCX-EMAP,Cdk5alpha,Eph
	GO:0070507	regulation of microtubule cytoskeleton organization	0.0580964	-2.84565	0.40157	43	5	0.00932836	536	10917	3.69784e+24	Patronin,alpha-Spec,step,CG15923,Jupiter
	GO:0006650	glycerophospholipid metabolic process	0.0587771	-2.834	0.40581	71	7	0.0130597	536	10917	2.76889e+36	CG42271,CG10082,CdsA,Pi4KIIalpha,Seipin,Ipp,PIP5K59B
	GO:0007391	dorsal closure	0.0597117	-2.81823	0.41122	101	9	0.016791	536	10917	4.28963e+44	crb,Dok,pnr,ena,aop,Abl,Rab5,peb,Src64B
	GO:0022416	chaeta development	0.0597117	-2.81823	0.41122	101	9	0.016791	536	10917	3.27243e+44	B-H1,B-H2,mam,nvy,msi,Hem,pnr,sgg,Bx
	GO:0007618	mating	0.0597682	-2.81728	0.41122	132	11	0.0205224	536	10917	3.12714e+54	w,tipE,cac,qtc,Tbh,Syn,FoxP,para,CASK,retn,pros
	GO:0007369	gastrulation	0.0598926	-2.8152	0.41161	86	8	0.0149254	536	10917	3.96733e+39	Z600,mthl1,mam,jeb,tll,slp1,Abl,T48
	GO:0008356	asymmetric cell division	0.0630222	-2.76427	0.43163	44	5	0.00932836	536	10917	3.51974e+24	brat,enc,mam,pros,neur
	GO:0043068	positive regulation of programmed cell death	0.0630222	-2.76427	0.43163	44	5	0.00932836	536	10917	4.17043e+24	rdx,lz,grim,aos,Csk
	GO:0071407	cellular response to organic cyclic compound	0.0630222	-2.76427	0.43163	44	5	0.00932836	536	10917	4.36564e+24	tll,AGO1,Eip75B,svp,Eip93F
	GO:0008347	glial cell migration	0.0633531	-2.75903	0.43241	31	4	0.00746269	536	10917	3.67035e+19	unc-5,gish,rap,so
	GO:0060322	head development	0.0633531	-2.75903	0.43241	31	4	0.00746269	536	10917	3.42773e+20	gcm,CG32006,slp2,slp1
	GO:0045787	positive regulation of cell cycle	0.0633531	-2.75903	0.43241	31	4	0.00746269	536	10917	3.17817e+20	CG32006,sgg,slp2,slp1
	GO:0042044	fluid transport	0.0635303	-2.75624	0.43312	19	3	0.00559701	536	10917	428963215832683	crb,cac,wus
	GO:0010256	endomembrane system organization	0.0644265	-2.74223	0.43873	118	10	0.0186567	536	10917	4.01435e+50	wnd,comt,Vha100-1,Tango5,Pi4KIIalpha,alpha-Spec,Topors,CG13284,Ire1,kst
	GO:0045859	regulation of protein kinase activity	0.0663458	-2.71287	0.45129	73	7	0.0130597	536	10917	3.25513e+35	CycD,sgg,Cbl,Dap160,step,Src64B,Krn
	GO:0061458	reproductive system development	0.0667651	-2.70658	0.45311	88	8	0.0149254	536	10917	3.39164e+39	eya,ena,lz,aop,Fas2,Rab5,inaC,robo3
	GO:0048608	reproductive structure development	0.0667651	-2.70658	0.45311	88	8	0.0149254	536	10917	3.39164e+39	eya,ena,lz,aop,Fas2,Rab5,inaC,robo3
	GO:0010563	negative regulation of phosphorus metabolic process	0.068176	-2.68566	0.45917	45	5	0.00932836	536	10917	3.12484e+24	sgg,Cbl,GABA-B-R1,peb,GABA-B-R2
	GO:0031647	regulation of protein stability	0.068176	-2.68566	0.45917	45	5	0.00932836	536	10917	4.17044e+24	rdx,Mlf,Abl,crb,fw
	GO:0045936	negative regulation of phosphate metabolic process	0.068176	-2.68566	0.45917	45	5	0.00932836	536	10917	3.12484e+24	sgg,Cbl,GABA-B-R1,peb,GABA-B-R2
	GO:0016079	synaptic vesicle exocytosis	0.0683595	-2.68297	0.45917	59	6	0.011194	536	10917	4.99685e+29	Caps,comt,Syn,CASK,Syx13,Syt4
	GO:0042387	plasmatocyte differentiation	0.0688869	-2.67529	0.45917	9	2	0.00373134	536	10917	3427734280	gcm,gcm2
	GO:0048036	central complex development	0.0688869	-2.67529	0.45917	9	2	0.00373134	536	10917	3706633314	Sema-5c,robo3
	GO:0051272	positive regulation of cellular component movement	0.0688869	-2.67529	0.45917	9	2	0.00373134	536	10917	3720139004	ena,Fhos
	GO:0007402	ganglion mother cell fate determination	0.0688869	-2.67529	0.45917	9	2	0.00373134	536	10917	3519741363	brat,pros
	GO:0006862	nucleotide transport	0.0688869	-2.67529	0.45917	9	2	0.00373134	536	10917	3127142115	w,sll
	GO:1902284	neuron projection extension involved in neuron projection guidance	0.0688869	-2.67529	0.45917	9	2	0.00373134	536	10917	3507043758	CadN,RhoGAP100F
	GO:0048846	axon extension involved in axon guidance	0.0688869	-2.67529	0.45917	9	2	0.00373134	536	10917	3507043758	CadN,RhoGAP100F
	GO:0045611	negative regulation of hemocyte differentiation	0.0688869	-2.67529	0.45917	9	2	0.00373134	536	10917	3427734280	gcm,gcm2
	GO:0042593	glucose homeostasis	0.0688869	-2.67529	0.45917	9	2	0.00373134	536	10917	4314635402	boss,Mio
	GO:0007162	negative regulation of cell adhesion	0.0688869	-2.67529	0.45917	9	2	0.00373134	536	10917	3339239833	aop,aos
	GO:0036099	female germ-line stem cell maintenance	0.0688869	-2.67529	0.45917	9	2	0.00373134	536	10917	3654434648	AGO1,aret
	GO:0072375	medium-term memory	0.0688869	-2.67529	0.45917	9	2	0.00373134	536	10917	32611642567	tau,CASK
	GO:0007548	sex differentiation	0.0692481	-2.67006	0.46106	104	9	0.016791	536	10917	3.39163e+44	eya,Yp2,ena,lz,aop,Fas2,Rab5,inaC,robo3
	GO:0003007	heart morphogenesis	0.0697186	-2.66329	0.46316	32	4	0.00746269	536	10917	3.49273e+19	Gli,slp1,Gbeta13F,mam
	GO:0001707	mesoderm formation	0.0697186	-2.66329	0.46316	32	4	0.00746269	536	10917	3.26373e+19	mthl1,slp1,mam,jeb
	GO:0043549	regulation of kinase activity	0.0703405	-2.65441	0.4665	74	7	0.0130597	536	10917	3.25513e+35	CycD,sgg,Cbl,Dap160,step,Src64B,Krn
	GO:0042327	positive regulation of phosphorylation	0.0703764	-2.6539	0.4665	89	8	0.0149254	536	10917	3.59004e+40	babo,crb,step,jeb,rdx,Dap160,Src64B,Krn
	GO:0022407	regulation of cell-cell adhesion	0.072119	-2.62944	0.47699	20	3	0.00559701	536	10917	333923983344653	aop,aos,wech
	GO:0010952	positive regulation of peptidase activity	0.072119	-2.62944	0.47699	20	3	0.00559701	536	10917	406444412944936	7B2,hbs,Eip93F
	GO:0007600	sensory perception	0.0731765	-2.61488	0.48345	357	24	0.0447761	536	10917	4.05802e+124	rpk,Obp51a,Kap3,dpr18,na,cac,Klp68D,dpr9,rdgC,Ank2,dpr12,DCX-EMAP,pros,Tmhs,gl,Atpalpha,dpr19,dpr5,boss,Obp44a,dpr,inaC,sei,Sdc
	GO:0071214	cellular response to abiotic stimulus	0.0735563	-2.6097	0.48542	46	5	0.00932836	536	10917	4.00144e+24	grim,CdsA,inaC,Atf-2,Tsp42Ej
	GO:0016331	morphogenesis of embryonic epithelium	0.073651	-2.60842	0.48551	121	10	0.0186567	536	10917	4.28963e+49	crb,Dok,pnr,ena,aop,sdt,Abl,Rab5,peb,Src64B
	GO:0030198	extracellular matrix organization	0.0763993	-2.57178	0.50197	33	4	0.00746269	536	10917	4.35283e+19	Cad99C,wus,Ppn,Mmp2
	GO:0032482	Rab protein signal transduction	0.0763993	-2.57178	0.50197	33	4	0.00746269	536	10917	4.29603e+19	RabX4,Rab5,Rab14,ltd
	GO:0048332	mesoderm morphogenesis	0.0763993	-2.57178	0.50197	33	4	0.00746269	536	10917	3.26373e+19	mthl1,slp1,mam,jeb
	GO:0090101	negative regulation of transmembrane receptor protein serine/threonine kinase signaling pathway	0.0811952	-2.5109	0.53056	21	3	0.00559701	536	10917	346814028832429	spict,cmpy,hiw
	GO:0045887	positive regulation of synaptic growth at neuromuscular junction	0.0811952	-2.5109	0.53056	21	3	0.00559701	536	10917	388633215837447	Ank2,cac,Sdc
	GO:0010883	regulation of lipid storage	0.0811952	-2.5109	0.53056	21	3	0.00559701	536	10917	439503124535940	CdsA,Seipin,ltd
	GO:0051017	actin filament bundle assembly	0.0811952	-2.5109	0.53056	21	3	0.00559701	536	10917	310754897335058	DAAM,Src64B,qua
	GO:0060439	trachea morphogenesis	0.0811952	-2.5109	0.53056	21	3	0.00559701	536	10917	390044395048971	Fhos,CdsA,Atpalpha
	GO:0006811	ion transport	0.0816824	-2.50492	0.53317	397	26	0.0485075	536	10917	4.05804e+130	rpk,CG42321,CG31030,w,SK,CG9935,sll,na,CG1688,tipE,cac,CG1090,tty,CG12531,HisCl1,para,CG3638,CG13646,Vha100-1,DAT,Eaat2,VhaM9.7-a,Atpalpha,spict,Oatp30B,sei
	GO:0008361	regulation of cell size	0.0827063	-2.49246	0.53324	62	6	0.011194	536	10917	2.49072e+32	Liprin-alpha,CadN,RhoGAPp190,Lar,seq,Sema-1a
	GO:0035225	determination of genital disc primordium	0.0833833	-2.48431	0.53324	10	2	0.00373134	536	10917	4161238168	sim,rho
	GO:0046664	dorsal closure, amnioserosa morphology change	0.0833833	-2.48431	0.53324	10	2	0.00373134	536	10917	3341842896	Rab5,crb
	GO:0002251	organ or tissue specific immune response	0.0833833	-2.48431	0.53324	10	2	0.00373134	536	10917	3958337978	bbg,Atf-2
	GO:0017157	regulation of exocytosis	0.0833833	-2.48431	0.53324	10	2	0.00373134	536	10917	3878642561	corn,GABA-B-R2
	GO:0035168	larval lymph gland hemocyte differentiation	0.0833833	-2.48431	0.53324	10	2	0.00373134	536	10917	3427731883	gcm,lz
	GO:0070192	chromosome organization involved in meiosis	0.0833833	-2.48431	0.53324	10	2	0.00373134	536	10917	4221337188	cona,Topors
	GO:0046534	positive regulation of photoreceptor cell differentiation	0.0833833	-2.48431	0.53324	10	2	0.00373134	536	10917	3339232039	aop,sev
	GO:0016332	establishment or maintenance of polarity of embryonic epithelium	0.0833833	-2.48431	0.53324	10	2	0.00373134	536	10917	4486142896	sdt,crb
	GO:0045176	apical protein localization	0.0833833	-2.48431	0.53324	10	2	0.00373134	536	10917	4486132544	sdt,Gbeta13F
	GO:0090288	negative regulation of cellular response to growth factor stimulus	0.0833833	-2.48431	0.53324	10	2	0.00373134	536	10917	3842435997	sty,Mmp2
	GO:0045742	positive regulation of epidermal growth factor receptor signaling pathway	0.0833833	-2.48431	0.53324	10	2	0.00373134	536	10917	38168326198	rho,Krn
	GO:0050805	negative regulation of synaptic transmission	0.0833833	-2.48431	0.53324	10	2	0.00373134	536	10917	3886336295	Ank2,jeb
	GO:0045464	R8 cell fate specification	0.0833833	-2.48431	0.53324	10	2	0.00373134	536	10917	4323432039	ro,sev
	GO:0002385	mucosal immune response	0.0833833	-2.48431	0.53324	10	2	0.00373134	536	10917	3958337978	bbg,Atf-2
	GO:0007415	defasciculation of motor neuron axon	0.0833833	-2.48431	0.53324	10	2	0.00373134	536	10917	3274343469	RhoGAPp190,Ptp99A
	GO:1901186	positive regulation of ERBB signaling pathway	0.0833833	-2.48431	0.53324	10	2	0.00373134	536	10917	38168326198	rho,Krn
	GO:0007482	haltere development	0.0833833	-2.48431	0.53324	10	2	0.00373134	536	10917	4435539833	drl,aos
	GO:0071396	cellular response to lipid	0.0833888	-2.48424	0.53324	34	4	0.00746269	536	10917	4.36564e+19	tll,Eip75B,svp,Eip93F
	GO:0032268	regulation of cellular protein metabolic process	0.0866711	-2.44563	0.55364	259	18	0.0335821	536	10917	3.89634e+90	Unr,babo,eIF4E-6,step,msi,CycD,sgg,Cbl,Dap160,Krn,brat,AGO1,crb,aret,boss,7B2,Hsp67Bc,Src64B
	GO:0010639	negative regulation of organelle organization	0.0878331	-2.43232	0.55927	63	6	0.011194	536	10917	3.96735e+29	Z600,gish,Patronin,alpha-Spec,CG15923,GABA-B-R2
	GO:0009581	detection of external stimulus	0.0878331	-2.43232	0.55927	63	6	0.011194	536	10917	4.04714e+29	CG11426,rdgC,CdsA,inaC,cac,Sdc
	GO:0009582	detection of abiotic stimulus	0.0878331	-2.43232	0.55927	63	6	0.011194	536	10917	4.04714e+29	CG11426,rdgC,CdsA,inaC,cac,Sdc
	GO:0034754	cellular hormone metabolic process	0.0906801	-2.40042	0.55985	35	4	0.00746269	536	10917	3.33743e+19	Npc2a,CG12398,Eo,CG9509
	GO:0097190	apoptotic signaling pathway	0.0907361	-2.3998	0.55985	22	3	0.00559701	536	10917	400143438544936	grim,Cdk5alpha,Eip93F
	GO:0061572	actin filament bundle organization	0.0907361	-2.3998	0.55985	22	3	0.00559701	536	10917	310754897335058	DAAM,Src64B,qua
	GO:0006906	vesicle fusion	0.0907361	-2.3998	0.55985	22	3	0.00559701	536	10917	470913341839485	comt,Rab5,Syx13
	GO:0006820	anion transport	0.0907795	-2.39932	0.55985	126	10	0.0186567	536	10917	3.64884e+49	CG42321,CG13646,w,sll,Eaat2,tty,CG12531,HisCl1,Oatp30B,CG3638
	GO:0007602	phototransduction	0.0910343	-2.39652	0.55985	49	5	0.00932836	536	10917	4.04714e+24	CG11426,rdgC,CdsA,inaC,cac
	GO:0010817	regulation of hormone levels	0.0910343	-2.39652	0.55985	49	5	0.00932836	536	10917	4.06443e+24	7B2,Npc2a,CG12398,Eo,CG9509
	GO:0042445	hormone metabolic process	0.0910343	-2.39652	0.55985	49	5	0.00932836	536	10917	4.06443e+24	7B2,Npc2a,CG12398,Eo,CG9509
	GO:0043412	macromolecule modification	0.0923397	-2.38228	0.55985	881	52	0.0970149	536	10917	5740876,35900,32429,32330,34367,39653,34385,40224,31248,45278,41096,35259,36445,42567,42358,40143,36465,37188,34069,42187,36436,41112,41704,45821,37954,36897,48973,41085,49701,37542,39035,32039,41398,37824,43015,43792,44355,43469,38961,37465,39732,33916,33845,34553,36579,38006,43803,33132,39071,44317,42986,36541	CG34452,babo,hiw,CG9941,Ror,FucTA,Cdk5alpha,rdgC,sgg,csw,ird1,Lar,Nrk,CASK,Ire1,wnd,CG4676,Topors,CG7115,CG7156,Drl-2,CG8866,rdx,Abl,CG30421,inaC,Src64B,neur,gish,ari-2,CG5087,sev,Csk,Pask,CG31108,CaMKI,drl,Ptp99A,Cbl,CG10082,sff,eya,mtm,Gyc32E,CG8485,gol,Eph,CG14619,Hsp67Bc,CanB,ssh,CG13344
	GO:1902532	negative regulation of intracellular signal transduction	0.0931298	-2.37376	0.55985	64	6	0.011194	536	10917	3.12483e+29	sgg,aop,Akap200,CG42684,sty,peb
	GO:0010638	positive regulation of organelle organization	0.0931298	-2.37376	0.55985	64	6	0.011194	536	10917	3.12484e+29	sgg,Fhos,DAAM,Jupiter,Atf-2,Syt4
	GO:0007616	long-term memory	0.0931298	-2.37376	0.55985	64	6	0.011194	536	10917	3.92933e+29	Mob2,Appl,CASK,Src64B,klg,neur
	GO:0050709	negative regulation of protein secretion	0.0957892	-2.34561	0.55985	2	1	0.00186567	536	10917	40288	cmpy
	GO:0008627	intrinsic apoptotic signaling pathway in response to osmotic stress	0.0957892	-2.34561	0.55985	2	1	0.00186567	536	10917	40014	grim
	GO:2000305	semaphorin-plexin signaling pathway involved in regulation of photoreceptor cell axon guidance	0.0957892	-2.34561	0.55985	2	1	0.00186567	536	10917	34192	Sema-1a
	GO:0002090	regulation of receptor internalization	0.0957892	-2.34561	0.55985	2	1	0.00186567	536	10917	39717	comm
	GO:0060297	regulation of sarcomere organization	0.0957892	-2.34561	0.55985	2	1	0.00186567	536	10917	31075	DAAM
	GO:0032469	endoplasmic reticulum calcium ion homeostasis	0.0957892	-2.34561	0.55985	2	1	0.00186567	536	10917	31245	Seipin
	GO:0006895	Golgi to endosome transport	0.0957892	-2.34561	0.55985	2	1	0.00186567	536	10917	44819	g
	GO:0097009	energy homeostasis	0.0957892	-2.34561	0.55985	2	1	0.00186567	536	10917	37447	Sdc
	GO:0048388	endosomal lumen acidification	0.0957892	-2.34561	0.55985	2	1	0.00186567	536	10917	43442	Vha100-1
	GO:0031441	negative regulation of mRNA 3'-end processing	0.0957892	-2.34561	0.55985	2	1	0.00186567	536	10917	31000	elav
	GO:0045217	cell-cell junction maintenance	0.0957892	-2.34561	0.55985	2	1	0.00186567	536	10917	42896	crb
	GO:2001284	regulation of BMP secretion	0.0957892	-2.34561	0.55985	2	1	0.00186567	536	10917	40288	cmpy
	GO:0030046	parallel actin filament bundle assembly	0.0957892	-2.34561	0.55985	2	1	0.00186567	536	10917	48973	Src64B
	GO:0050796	regulation of insulin secretion	0.0957892	-2.34561	0.55985	2	1	0.00186567	536	10917	42561	GABA-B-R2
	GO:2001135	regulation of endocytic recycling	0.0957892	-2.34561	0.55985	2	1	0.00186567	536	10917	49701	gish
	GO:0045470	R8 cell-mediated photoreceptor organization	0.0957892	-2.34561	0.55985	2	1	0.00186567	536	10917	43146	boss
	GO:0014904	myotube cell development	0.0957892	-2.34561	0.55985	2	1	0.00186567	536	10917	38491	ens
	GO:0042062	long-term strengthening of neuromuscular junction	0.0957892	-2.34561	0.55985	2	1	0.00186567	536	10917	38231	alpha-Spec
	GO:0010458	exit from mitosis	0.0957892	-2.34561	0.55985	2	1	0.00186567	536	10917	45922	rap
	GO:0035249	synaptic transmission, glutamatergic	0.0957892	-2.34561	0.55985	2	1	0.00186567	536	10917	49968	Caps
	GO:0002092	positive regulation of receptor internalization	0.0957892	-2.34561	0.55985	2	1	0.00186567	536	10917	39717	comm
	GO:0071763	nuclear membrane organization	0.0957892	-2.34561	0.55985	2	1	0.00186567	536	10917	37188	Topors
	GO:0061098	positive regulation of protein tyrosine kinase activity	0.0957892	-2.34561	0.55985	2	1	0.00186567	536	10917	326198	Krn
	GO:0090276	regulation of peptide hormone secretion	0.0957892	-2.34561	0.55985	2	1	0.00186567	536	10917	42561	GABA-B-R2
	GO:0035199	salt aversion	0.0957892	-2.34561	0.55985	2	1	0.00186567	536	10917	2768858	dpr
	GO:0060384	innervation	0.0957892	-2.34561	0.55985	2	1	0.00186567	536	10917	41363	pros
	GO:0032529	follicle cell microvillus organization	0.0957892	-2.34561	0.55985	2	1	0.00186567	536	10917	43528	Cad99C
	GO:0016486	peptide hormone processing	0.0957892	-2.34561	0.55985	2	1	0.00186567	536	10917	40644	7B2
	GO:0042305	specification of segmental identity, mandibular segment	0.0957892	-2.34561	0.55985	2	1	0.00186567	536	10917	33607	slp1
	GO:0097106	postsynaptic density organization	0.0957892	-2.34561	0.55985	2	1	0.00186567	536	10917	50225	Prosap
	GO:0036071	N-glycan fucosylation	0.0957892	-2.34561	0.55985	2	1	0.00186567	536	10917	39653	FucTA
	GO:0051126	negative regulation of actin nucleation	0.0957892	-2.34561	0.55985	2	1	0.00186567	536	10917	49701	gish
	GO:0009749	response to glucose	0.0957892	-2.34561	0.55985	2	1	0.00186567	536	10917	43146	boss
	GO:0015734	taurine transport	0.0957892	-2.34561	0.55985	2	1	0.00186567	536	10917	33247	Eaat2
	GO:0032353	negative regulation of hormone biosynthetic process	0.0957892	-2.34561	0.55985	2	1	0.00186567	536	10917	38961	Cbl
	GO:0032485	regulation of Ral protein signal transduction	0.0957892	-2.34561	0.55985	2	1	0.00186567	536	10917	36881	CG5522
	GO:0007158	neuron cell-cell adhesion	0.0957892	-2.34561	0.55985	2	1	0.00186567	536	10917	42025	Fas1
	GO:0051451	myoblast migration	0.0957892	-2.34561	0.55985	2	1	0.00186567	536	10917	36258	ths
	GO:0010114	response to red light	0.0957892	-2.34561	0.55985	2	1	0.00186567	536	10917	42210	gl
	GO:0031648	protein destabilization	0.0957892	-2.34561	0.55985	2	1	0.00186567	536	10917	41704	rdx
	GO:2000738	positive regulation of stem cell differentiation	0.0957892	-2.34561	0.55985	2	1	0.00186567	536	10917	34648	aret
	GO:0090505	epiboly involved in wound healing	0.0957892	-2.34561	0.55985	2	1	0.00186567	536	10917	39004	Fhos
	GO:0048013	ephrin receptor signaling pathway	0.0957892	-2.34561	0.55985	2	1	0.00186567	536	10917	43803	Eph
	GO:0044319	wound healing, spreading of cells	0.0957892	-2.34561	0.55985	2	1	0.00186567	536	10917	39004	Fhos
	GO:0042705	ocellus photoreceptor cell differentiation	0.0957892	-2.34561	0.55985	2	1	0.00186567	536	10917	33239	Pph13
	GO:0007129	synapsis	0.0957892	-2.34561	0.55985	2	1	0.00186567	536	10917	42213	cona
	GO:0045856	positive regulation of pole plasm oskar mRNA localization	0.0957892	-2.34561	0.55985	2	1	0.00186567	536	10917	35680	didum
	GO:0070827	chromatin maintenance	0.0957892	-2.34561	0.55985	2	1	0.00186567	536	10917	37978	Atf-2
	GO:0048491	retrograde synaptic vesicle transport	0.0957892	-2.34561	0.55985	2	1	0.00186567	536	10917	53472	Aplip1
	GO:0070884	regulation of calcineurin-NFAT signaling cascade	0.0957892	-2.34561	0.55985	2	1	0.00186567	536	10917	31248	sgg
	GO:0050774	negative regulation of dendrite morphogenesis	0.0957892	-2.34561	0.55985	2	1	0.00186567	536	10917	35070	CadN
	GO:0090504	epiboly	0.0957892	-2.34561	0.55985	2	1	0.00186567	536	10917	39004	Fhos
	GO:2000495	regulation of cell proliferation involved in compound eye morphogenesis	0.0957892	-2.34561	0.55985	2	1	0.00186567	536	10917	36750	Mlf
	GO:1900244	positive regulation of synaptic vesicle endocytosis	0.0957892	-2.34561	0.55985	2	1	0.00186567	536	10917	42567	CASK
	GO:0009639	response to red or far red light	0.0957892	-2.34561	0.55985	2	1	0.00186567	536	10917	42210	gl
	GO:0097374	sensory neuron axon guidance	0.0957892	-2.34561	0.55985	2	1	0.00186567	536	10917	39441	mirr
	GO:0002227	innate immune response in mucosa	0.0957892	-2.34561	0.55985	2	1	0.00186567	536	10917	39583	bbg
	GO:0031116	positive regulation of microtubule polymerization	0.0957892	-2.34561	0.55985	2	1	0.00186567	536	10917	41392	Jupiter
	GO:0022611	dormancy process	0.0957892	-2.34561	0.55985	2	1	0.00186567	536	10917	45840	cpo
	GO:0046333	octopamine metabolic process	0.0957892	-2.34561	0.55985	2	1	0.00186567	536	10917	31718	Tbh
	GO:0046473	phosphatidic acid metabolic process	0.0957892	-2.34561	0.55985	2	1	0.00186567	536	10917	31245	Seipin
	GO:0038004	epidermal growth factor receptor ligand maturation	0.0957892	-2.34561	0.55985	2	1	0.00186567	536	10917	38168	rho
	GO:0015872	dopamine transport	0.0957892	-2.34561	0.55985	2	1	0.00186567	536	10917	36849	DAT
	GO:0048741	skeletal muscle fiber development	0.0957892	-2.34561	0.55985	2	1	0.00186567	536	10917	38491	ens
	GO:0030845	phospholipase C-inhibiting G-protein coupled receptor signaling pathway	0.0957892	-2.34561	0.55985	2	1	0.00186567	536	10917	36897	inaC
	GO:0010797	regulation of multivesicular body size involved in endosome transport	0.0957892	-2.34561	0.55985	2	1	0.00186567	536	10917	38418	kst
	GO:0021550	medulla oblongata development	0.0957892	-2.34561	0.55985	2	1	0.00186567	536	10917	44642	Apc
	GO:0042463	ocellus photoreceptor cell development	0.0957892	-2.34561	0.55985	2	1	0.00186567	536	10917	33239	Pph13
	GO:0071526	semaphorin-plexin signaling pathway	0.0957892	-2.34561	0.55985	2	1	0.00186567	536	10917	34192	Sema-1a
	GO:0050731	positive regulation of peptidyl-tyrosine phosphorylation	0.0957892	-2.34561	0.55985	2	1	0.00186567	536	10917	326198	Krn
	GO:0042135	neurotransmitter catabolic process	0.0957892	-2.34561	0.55985	2	1	0.00186567	536	10917	41625	Ace
	GO:0051937	catecholamine transport	0.0957892	-2.34561	0.55985	2	1	0.00186567	536	10917	36849	DAT
	GO:0030036	actin cytoskeleton organization	0.0959644	-2.34378	0.5599	211	15	0.0279851	536	10917	3.38453e+74	mtm,Gbeta13F,gukh,alpha-Spec,DAAM,Sry-alpha,Ced-12,Hem,ena,Sra-1,CG3618,Src64B,qua,loco,ssh
	GO:0071310	cellular response to organic substance	0.0967409	-2.33572	0.5599	144	11	0.0205224	536	10917	3.59004e+54	babo,AGO1,Eip75B,dock,svp,ths,pnr,tll,csw,Ire1,Eip93F
	GO:0051338	regulation of transferase activity	0.0972458	-2.33051	0.5599	80	7	0.0130597	536	10917	3.25513e+35	CycD,sgg,Cbl,Dap160,step,Src64B,Krn
	GO:0010942	positive regulation of cell death	0.0972963	-2.32999	0.5599	50	5	0.00932836	536	10917	4.17043e+24	rdx,lz,grim,aos,Csk
	GO:0048568	embryonic organ development	0.0972963	-2.32999	0.5599	50	5	0.00932836	536	10917	3.42774e+24	gcm,pnr,lz,qm,gcm2
	GO:0001704	formation of primary germ layer	0.098265	-2.32009	0.5599	36	4	0.00746269	536	10917	3.26373e+19	mthl1,slp1,mam,jeb
	GO:0019827	stem cell maintenance	0.0985949	-2.31674	0.5599	65	6	0.011194	536	10917	3.12484e+29	sgg,AGO1,mam,aret,msi,neur
	GO:2000647	negative regulation of stem cell proliferation	0.0987019	-2.31565	0.5599	11	2	0.00373134	536	10917	3519741363	brat,pros
	GO:1903319	positive regulation of protein maturation	0.0987019	-2.31565	0.5599	11	2	0.00373134	536	10917	4064431248	7B2,sgg
	GO:2001013	epithelial cell proliferation involved in renal tubule morphogenesis	0.0987019	-2.31565	0.5599	11	2	0.00373134	536	10917	4149138168	svp,rho
	GO:0008543	fibroblast growth factor receptor signaling pathway	0.0987019	-2.31565	0.5599	11	2	0.00373134	536	10917	3625845278	ths,csw
	GO:0007445	determination of imaginal disc primordium	0.0987019	-2.31565	0.5599	11	2	0.00373134	536	10917	4161238168	sim,rho
	GO:0042439	ethanolamine-containing compound metabolic process	0.0987019	-2.31565	0.5599	11	2	0.00373134	536	10917	3171841625	Tbh,Ace
	GO:0032321	positive regulation of Rho GTPase activity	0.0987019	-2.31565	0.5599	11	2	0.00373134	536	10917	3463342496	Ced-12,RhoGAP93B
	GO:0010954	positive regulation of protein processing	0.0987019	-2.31565	0.5599	11	2	0.00373134	536	10917	4064431248	7B2,sgg
	GO:0044344	cellular response to fibroblast growth factor stimulus	0.0987019	-2.31565	0.5599	11	2	0.00373134	536	10917	3625845278	ths,csw
	GO:0035158	regulation of tube diameter, open tracheal system	0.0987019	-2.31565	0.5599	11	2	0.00373134	536	10917	3136448971	Fas2,Atpalpha
	GO:0007096	regulation of exit from mitosis	0.0987019	-2.31565	0.5599	11	2	0.00373134	536	10917	4592234648	rap,aret
	GO:0006885	regulation of pH	0.0987019	-2.31565	0.5599	11	2	0.00373134	536	10917	4344234840	Vha100-1,Rab14
	GO:0007032	endosome organization	0.0987019	-2.31565	0.5599	11	2	0.00373134	536	10917	4344240670	Vha100-1,Pi4KIIalpha
	GO:0035216	haltere disc development	0.0987019	-2.31565	0.5599	11	2	0.00373134	536	10917	4435539833	drl,aos
	GO:0050673	epithelial cell proliferation	0.0987019	-2.31565	0.5599	11	2	0.00373134	536	10917	4149138168	svp,rho
	GO:0055067	monovalent inorganic cation homeostasis	0.0987019	-2.31565	0.5599	11	2	0.00373134	536	10917	4344234840	Vha100-1,Rab14
	GO:0071774	response to fibroblast growth factor	0.0987019	-2.31565	0.5599	11	2	0.00373134	536	10917	3625845278	ths,csw
	GO:0034331	cell junction maintenance	0.0987019	-2.31565	0.5599	11	2	0.00373134	536	10917	4289641398	crb,Csk
	GO:0045666	positive regulation of neuron differentiation	0.0987019	-2.31565	0.5599	11	2	0.00373134	536	10917	3339232039	aop,sev
	GO:0060911	cardiac cell fate commitment	0.0987019	-2.31565	0.5599	11	2	0.00373134	536	10917	4484941491	pnr,svp
	GO:0061331	epithelial cell proliferation involved in Malpighian tubule morphogenesis	0.0987019	-2.31565	0.5599	11	2	0.00373134	536	10917	4149138168	svp,rho
	GO:0050975	sensory perception of touch	0.0987019	-2.31565	0.5599	11	2	0.00373134	536	10917	4058045338	rpk,na
	GO:0045862	positive regulation of proteolysis	0.0987019	-2.31565	0.5599	11	2	0.00373134	536	10917	4064431248	7B2,sgg
	GO:0035293	chitin-based larval cuticle pattern formation	0.0987019	-2.31565	0.5599	11	2	0.00373134	536	10917	3124844642	sgg,Apc
	GO:0042386	hemocyte differentiation	0.100718	-2.29543	0.56864	23	3	0.00559701	536	10917	342773188334280	gcm,lz,gcm2
	GO:0043269	regulation of ion transport	0.100718	-2.29543	0.56864	23	3	0.00559701	536	10917	379794121538504	NKAIN,Teh1,tipE
	GO:0031334	positive regulation of protein complex assembly	0.100718	-2.29543	0.56864	23	3	0.00559701	536	10917	446423107541392	Apc,DAAM,Jupiter
	GO:0051965	positive regulation of synapse assembly	0.100718	-2.29543	0.56864	23	3	0.00559701	536	10917	388633215837447	Ank2,cac,Sdc
	GO:0051962	positive regulation of nervous system development	0.100718	-2.29543	0.56864	23	3	0.00559701	536	10917	388633215837447	Ank2,cac,Sdc
	GO:0008104	protein localization	0.105151	-2.25235	0.59271	463	29	0.0541045	536	10917	4.29604e+147	RabX4,didum,Akap200,Gbeta13F,Pi4KIIalpha,qtc,Ank2,sdt,Rab5,CG9121,Dap160,Vps35,CG43340,pros,Syx13,klar,Tango5,g,crb,gukh,stnB,CG9426,Rab14,p,Apc,tamo,loco,neur,ltd
	GO:0044085	cellular component biogenesis	0.105179	-2.25209	0.59271	796	47	0.0876866	536	10917	43528,32071,35623,31292,36876,43571,41861,31248,35378,35259,35058,47091,40912,42896,36295,39717,33608,37888,48973,41085,38418,38963,36010,31075,34702,42443,34192,44861,41363,47285,317817,249072,35343,42213,33845,31644,32152,36544,34927,50225,34840,48971,40462,34646,33607,42672,38491	Cad99C,Kap3,lbm,kirre,unc-104,Sry-alpha,Sra-1,sgg,Dap160,Lar,qua,comt,CG34127,crb,jeb,comm,slp2,betaTub60D,Src64B,neur,kst,Unr,dila,DAAM,CG5142,CG15923,Sema-1a,sdt,pros,repo,CG32006,Liprin-alpha,vari,cona,mtm,bou,wisp,AGO1,Gli,Prosap,Rab14,Atpalpha,Hem,crok,slp1,loco,ens
	GO:0071363	cellular response to growth factor stimulus	0.106135	-2.24305	0.59641	37	4	0.00746269	536	10917	4.48494e+19	pnr,ths,babo,csw
	GO:0030431	sleep	0.106135	-2.24305	0.59641	37	4	0.00746269	536	10917	2.76894e+21	rho-5,DAT,Atf-2,CanB
	GO:0007365	periodic partitioning	0.106135	-2.24305	0.59641	37	4	0.00746269	536	10917	3.61253e+19	stan,slp2,sgg,AGO1
	GO:0006417	regulation of translation	0.107317	-2.23196	0.60218	82	7	0.0130597	536	10917	3.89634e+34	Unr,brat,AGO1,eIF4E-6,aret,msi,Hsp67Bc
	GO:0051246	regulation of protein metabolic process	0.107363	-2.23154	0.60218	320	21	0.0391791	536	10917	3.89634e+105	Unr,babo,eIF4E-6,step,msi,CycD,sgg,hbs,Cbl,Dap160,Eip93F,Krn,brat,AGO1,crb,aret,boss,rdx,7B2,Hsp67Bc,Src64B
	GO:0007015	actin filament organization	0.107551	-2.22979	0.60267	114	9	0.016791	536	10917	3.25444e+44	Gbeta13F,alpha-Spec,DAAM,Sry-alpha,ena,Ced-12,CG3618,Src64B,qua
	GO:0008593	regulation of Notch signaling pathway	0.108138	-2.22434	0.60483	98	8	0.0149254	536	10917	3.61254e+39	stan,crb,Tsp86D,Tom,hbs,Dap160,phyl,neur
	GO:0032269	negative regulation of cellular protein metabolic process	0.108138	-2.22434	0.60483	98	8	0.0149254	536	10917	3.89634e+39	Unr,AGO1,eIF4E-6,crb,aret,msi,sgg,Cbl
	GO:0007030	Golgi organization	0.110022	-2.20708	0.61421	67	6	0.011194	536	10917	4.01435e+30	wnd,comt,Tango5,Pi4KIIalpha,Ire1,CG13284
	GO:0032318	regulation of Ras GTPase activity	0.110022	-2.20708	0.61421	67	6	0.011194	536	10917	3.46334e+29	Ced-12,SIDL,RN-tre,CG5337,RhoGAP93B,plx
	GO:0010629	negative regulation of gene expression	0.110302	-2.20453	0.6152	339	22	0.0410448	536	10917	4.03704e+112	Aef1,wuc,seq,aop,Side,retn,mirr,pros,rho,CG32006,B-H1,B-H2,AGO1,blanks,scrt,toe,pnr,slp2,lz,NC2alpha,slp1,CG17265
	GO:0042331	phototaxis	0.111115	-2.19719	0.61686	24	3	0.00559701	536	10917	403834149141625	M6,svp,Ace
	GO:0007484	imaginal disc-derived genitalia development	0.111115	-2.19719	0.61686	24	3	0.00559701	536	10917	318833341831364	lz,Rab5,Fas2
	GO:0017085	response to insecticide	0.111115	-2.19719	0.61686	24	3	0.00559701	536	10917	358323261941625	mtt,para,Ace
	GO:0003382	epithelial cell morphogenesis	0.111115	-2.19719	0.61686	24	3	0.00559701	536	10917	372013124845821	ena,sgg,Abl
	GO:0009453	energy taxis	0.111115	-2.19719	0.61686	24	3	0.00559701	536	10917	403834149141625	M6,svp,Ace
	GO:0007293	germarium-derived egg chamber formation	0.112555	-2.18431	0.62427	83	7	0.0130597	536	10917	4.45434e+34	enc,AGO1,alpha-Spec,Apc,aret,Src64B,Csk
	GO:0006644	phospholipid metabolic process	0.112911	-2.18115	0.62567	99	8	0.0149254	536	10917	2.76889e+41	CG42271,CdsA,Pi4KIIalpha,Ipp,CG3812,CG10082,Seipin,PIP5K59B
	GO:0008202	steroid metabolic process	0.11428	-2.1691	0.62874	38	4	0.00746269	536	10917	3.33743e+19	Npc2a,CG12398,Eo,CG9509
	GO:0070848	response to growth factor	0.11428	-2.1691	0.62874	38	4	0.00746269	536	10917	4.48494e+19	pnr,ths,babo,csw
	GO:0061319	nephrocyte differentiation	0.114727	-2.1652	0.62874	12	2	0.00373134	536	10917	4484931292	pnr,kirre
	GO:0061343	cell adhesion involved in heart morphogenesis	0.114727	-2.1652	0.62874	12	2	0.00373134	536	10917	3492732544	Gli,Gbeta13F
	GO:0007301	female germline ring canal formation	0.114727	-2.1652	0.62874	12	2	0.00373134	536	10917	3823148973	alpha-Spec,Src64B
	GO:0046164	alcohol catabolic process	0.114727	-2.1652	0.62874	12	2	0.00373134	536	10917	4170141625	Ipp,Ace
	GO:0043704	photoreceptor cell fate specification	0.114727	-2.1652	0.62874	12	2	0.00373134	536	10917	4323432039	ro,sev
	GO:0061318	renal filtration cell differentiation	0.114727	-2.1652	0.62874	12	2	0.00373134	536	10917	4484931292	pnr,kirre
	GO:0007638	mechanosensory behavior	0.114727	-2.1652	0.62874	12	2	0.00373134	536	10917	4601532619	tutl,para
	GO:0035160	maintenance of epithelial integrity, open tracheal system	0.114727	-2.1652	0.62874	12	2	0.00373134	536	10917	3816831391	rho,peb
	GO:1901616	organic hydroxy compound catabolic process	0.114727	-2.1652	0.62874	12	2	0.00373134	536	10917	4170141625	Ipp,Ace
	GO:0035002	liquid clearance, open tracheal system	0.114727	-2.1652	0.62874	12	2	0.00373134	536	10917	4289632683	crb,wus
	GO:0048066	developmental pigmentation	0.115978	-2.15435	0.63443	68	6	0.011194	536	10917	3.98364e+29	st,g,p,w,sdk,ltd
	GO:0018958	phenol-containing compound metabolic process	0.115978	-2.15435	0.63443	68	6	0.011194	536	10917	3.17184e+29	Tbh,RhoBTB,DCX-EMAP,grim,Cdk5alpha,Eph
	GO:0032870	cellular response to hormone stimulus	0.117336	-2.14271	0.64127	53	5	0.00932836	536	10917	4.36564e+24	tll,Eip75B,dock,svp,Eip93F
	GO:0061024	membrane organization	0.11966	-2.1231	0.65337	167	12	0.0223881	536	10917	4.70914e+61	comt,drpr,alpha-Spec,crb,Topors,stnB,Rab5,csw,Syx13,klar,Eip93F,kst
	GO:0050821	protein stabilization	0.121902	-2.10453	0.6632	25	3	0.00559701	536	10917	367504289632162	Mlf,crb,fw
	GO:0051495	positive regulation of cytoskeleton organization	0.121902	-2.10453	0.6632	25	3	0.00559701	536	10917	390043107541392	Fhos,DAAM,Jupiter
	GO:0090068	positive regulation of cell cycle process	0.121902	-2.10453	0.6632	25	3	0.00559701	536	10917	312484592234648	sgg,rap,aret
	GO:0048542	lymph gland development	0.121902	-2.10453	0.6632	25	3	0.00559701	536	10917	342774484931883	gcm,pnr,lz
	GO:0042060	wound healing	0.122094	-2.10297	0.66364	69	6	0.011194	536	10917	3.60794e+29	CG12913,Eig71Ee,lz,Fhos,kst,Mmp2
	GO:0061245	establishment or maintenance of bipolar cell polarity	0.122692	-2.09808	0.66442	39	4	0.00746269	536	10917	4.48613e+19	sdt,Rab5,crb,Csk
	GO:0035088	establishment or maintenance of apical/basal cell polarity	0.122692	-2.09808	0.66442	39	4	0.00746269	536	10917	4.48613e+19	sdt,Rab5,crb,Csk
	GO:0042180	cellular ketone metabolic process	0.122692	-2.09808	0.66442	39	4	0.00746269	536	10917	3.33743e+19	Npc2a,CG12398,Eo,CG9509
	GO:0014070	response to organic cyclic compound	0.122793	-2.09725	0.66442	101	8	0.0149254	536	10917	3.65444e+39	AGO1,Eip75B,svp,tll,Bx,para,Hsp67Bc,Eip93F
	GO:0051248	negative regulation of protein metabolic process	0.122793	-2.09725	0.66442	101	8	0.0149254	536	10917	3.89634e+39	Unr,AGO1,eIF4E-6,crb,aret,msi,sgg,Cbl
	GO:0046907	intracellular transport	0.126972	-2.06379	0.68641	473	29	0.0541045	536	10917	4.18334e+148	SIDL,dila,didum,Aplip1,Kap3,Klp68D,unc-104,qtc,futsch,ena,Rab5,syd,Vps35,CG43340,Unc-76,Syx13,qua,klar,comt,mtm,g,thoc5,stnB,p,CG9279,Abl,Apc,loco,kst
	GO:0015672	monovalent inorganic cation transport	0.12761	-2.05877	0.68923	152	11	0.0205224	536	10917	4.05803e+55	rpk,CG31030,Vha100-1,SK,CG1688,tipE,CG1090,VhaM9.7-a,Atpalpha,para,sei
	GO:0032270	positive regulation of cellular protein metabolic process	0.129056	-2.04751	0.69446	86	7	0.0130597	536	10917	4.06443e+35	7B2,sgg,babo,Dap160,step,Src64B,Krn
	GO:0035309	wing and notum subfield formation	0.131353	-2.02986	0.69446	13	2	0.00373134	536	10917	3124838168	sgg,rho
	GO:0006970	response to osmotic stress	0.131353	-2.02986	0.69446	13	2	0.00373134	536	10917	4001437978	grim,Atf-2
	GO:0035166	post-embryonic hemopoiesis	0.131353	-2.02986	0.69446	13	2	0.00373134	536	10917	3427731883	gcm,lz
	GO:0061057	peptidoglycan recognition protein signaling pathway	0.131353	-2.02986	0.69446	13	2	0.00373134	536	10917	3337439063	Npc2a,PGRP-LC
	GO:0035167	larval lymph gland hemopoiesis	0.131353	-2.02986	0.69446	13	2	0.00373134	536	10917	3427731883	gcm,lz
	GO:0031338	regulation of vesicle fusion	0.131353	-2.02986	0.69446	13	2	0.00373134	536	10917	4256140876	GABA-B-R2,Syt4
	GO:0009725	response to hormone	0.131694	-2.02727	0.69446	55	5	0.00932836	536	10917	4.36564e+24	tll,Eip75B,dock,svp,Eip93F
	GO:0046661	male sex differentiation	0.133054	-2.017	0.69446	26	3	0.00559701	536	10917	339163341831364	eya,Rab5,Fas2
	GO:0044089	positive regulation of cellular component biogenesis	0.133054	-2.017	0.69446	26	3	0.00559701	536	10917	388633215837447	Ank2,cac,Sdc
	GO:0035162	embryonic hemopoiesis	0.133054	-2.017	0.69446	26	3	0.00559701	536	10917	342773188334280	gcm,lz,gcm2
	GO:0007367	segment polarity determination	0.133054	-2.017	0.69446	26	3	0.00559701	536	10917	361253124836544	stan,sgg,AGO1
	GO:0051345	positive regulation of hydrolase activity	0.139157	-1.97216	0.69446	56	5	0.00932836	536	10917	3.46334e+24	Ced-12,7B2,hbs,RhoGAP93B,Eip93F
	GO:0051503	adenine nucleotide transport	0.140192	-1.96474	0.69446	3	1	0.00186567	536	10917	42115	sll
	GO:0031887	lipid particle transport along microtubule	0.140192	-1.96474	0.69446	3	1	0.00186567	536	10917	38067	klar
	GO:0030902	hindbrain development	0.140192	-1.96474	0.69446	3	1	0.00186567	536	10917	44642	Apc
	GO:0007175	negative regulation of epidermal growth factor-activated receptor activity	0.140192	-1.96474	0.69446	3	1	0.00186567	536	10917	38961	Cbl
	GO:0048831	regulation of shoot system development	0.140192	-1.96474	0.69446	3	1	0.00186567	536	10917	49701	gish
	GO:0035311	wing cell fate specification	0.140192	-1.96474	0.69446	3	1	0.00186567	536	10917	38168	rho
	GO:0061321	garland nephrocyte differentiation	0.140192	-1.96474	0.69446	3	1	0.00186567	536	10917	31292	kirre
	GO:0044332	Wnt signaling pathway involved in dorsal/ventral axis specification	0.140192	-1.96474	0.69446	3	1	0.00186567	536	10917	40105	CG32206
	GO:0001845	phagolysosome assembly	0.140192	-1.96474	0.69446	3	1	0.00186567	536	10917	34840	Rab14
	GO:0046683	response to organophosphorus	0.140192	-1.96474	0.69446	3	1	0.00186567	536	10917	41625	Ace
	GO:0008611	ether lipid biosynthetic process	0.140192	-1.96474	0.69446	3	1	0.00186567	536	10917	36669	CG10253
	GO:0035027	leading edge cell fate commitment	0.140192	-1.96474	0.69446	3	1	0.00186567	536	10917	31391	peb
	GO:0090087	regulation of peptide transport	0.140192	-1.96474	0.69446	3	1	0.00186567	536	10917	42561	GABA-B-R2
	GO:0007503	fat body development	0.140192	-1.96474	0.69446	3	1	0.00186567	536	10917	41491	svp
	GO:0022617	extracellular matrix disassembly	0.140192	-1.96474	0.69446	3	1	0.00186567	536	10917	35997	Mmp2
	GO:0046956	positive phototaxis	0.140192	-1.96474	0.69446	3	1	0.00186567	536	10917	40383	M6
	GO:0007396	suture of dorsal opening	0.140192	-1.96474	0.69446	3	1	0.00186567	536	10917	37201	ena
	GO:1902805	positive regulation of synaptic vesicle transport	0.140192	-1.96474	0.69446	3	1	0.00186567	536	10917	42567	CASK
	GO:0007403	glial cell fate determination	0.140192	-1.96474	0.69446	3	1	0.00186567	536	10917	34277	gcm
	GO:2000272	negative regulation of receptor activity	0.140192	-1.96474	0.69446	3	1	0.00186567	536	10917	38961	Cbl
	GO:0010796	regulation of multivesicular body size	0.140192	-1.96474	0.69446	3	1	0.00186567	536	10917	38418	kst
	GO:0021781	glial cell fate commitment	0.140192	-1.96474	0.69446	3	1	0.00186567	536	10917	34277	gcm
	GO:0002791	regulation of peptide secretion	0.140192	-1.96474	0.69446	3	1	0.00186567	536	10917	42561	GABA-B-R2
	GO:0031623	receptor internalization	0.140192	-1.96474	0.69446	3	1	0.00186567	536	10917	39717	comm
	GO:0072553	terminal button organization	0.140192	-1.96474	0.69446	3	1	0.00186567	536	10917	31364	Fas2
	GO:0034769	basement membrane disassembly	0.140192	-1.96474	0.69446	3	1	0.00186567	536	10917	35997	Mmp2
	GO:0060612	adipose tissue development	0.140192	-1.96474	0.69446	3	1	0.00186567	536	10917	41491	svp
	GO:0090382	phagosome maturation	0.140192	-1.96474	0.69446	3	1	0.00186567	536	10917	34840	Rab14
	GO:0046503	glycerolipid catabolic process	0.140192	-1.96474	0.69446	3	1	0.00186567	536	10917	32436	dob
	GO:0031113	regulation of microtubule polymerization	0.140192	-1.96474	0.69446	3	1	0.00186567	536	10917	41392	Jupiter
	GO:2000300	regulation of synaptic vesicle exocytosis	0.140192	-1.96474	0.69446	3	1	0.00186567	536	10917	42561	GABA-B-R2
	GO:0048668	collateral sprouting	0.140192	-1.96474	0.69446	3	1	0.00186567	536	10917	40143	wnd
	GO:2000024	regulation of leaf development	0.140192	-1.96474	0.69446	3	1	0.00186567	536	10917	49701	gish
	GO:0043558	regulation of translational initiation in response to stress	0.140192	-1.96474	0.69446	3	1	0.00186567	536	10917	39071	Hsp67Bc
	GO:0015844	monoamine transport	0.140192	-1.96474	0.69446	3	1	0.00186567	536	10917	36849	DAT
	GO:0048682	sprouting of injured axon	0.140192	-1.96474	0.69446	3	1	0.00186567	536	10917	40143	wnd
	GO:0017055	negative regulation of RNA polymerase II transcriptional preinitiation complex assembly	0.140192	-1.96474	0.69446	3	1	0.00186567	536	10917	37471	NC2alpha
	GO:0009746	response to hexose	0.140192	-1.96474	0.69446	3	1	0.00186567	536	10917	43146	boss
	GO:0014812	muscle cell migration	0.140192	-1.96474	0.69446	3	1	0.00186567	536	10917	36258	ths
	GO:0001556	oocyte maturation	0.140192	-1.96474	0.69446	3	1	0.00186567	536	10917	32152	wisp
	GO:0046461	neutral lipid catabolic process	0.140192	-1.96474	0.69446	3	1	0.00186567	536	10917	32436	dob
	GO:1900619	acetate ester metabolic process	0.140192	-1.96474	0.69446	3	1	0.00186567	536	10917	41625	Ace
	GO:0033628	regulation of cell adhesion mediated by integrin	0.140192	-1.96474	0.69446	3	1	0.00186567	536	10917	44653	wech
	GO:0036059	nephrocyte diaphragm assembly	0.140192	-1.96474	0.69446	3	1	0.00186567	536	10917	31292	kirre
	GO:0045898	regulation of RNA polymerase II transcriptional preinitiation complex assembly	0.140192	-1.96474	0.69446	3	1	0.00186567	536	10917	37471	NC2alpha
	GO:0051496	positive regulation of stress fiber assembly	0.140192	-1.96474	0.69446	3	1	0.00186567	536	10917	39004	Fhos
	GO:0035028	leading edge cell fate determination	0.140192	-1.96474	0.69446	3	1	0.00186567	536	10917	31391	peb
	GO:0008065	establishment of blood-nerve barrier	0.140192	-1.96474	0.69446	3	1	0.00186567	536	10917	34927	Gli
	GO:0050848	regulation of calcium-mediated signaling	0.140192	-1.96474	0.69446	3	1	0.00186567	536	10917	31248	sgg
	GO:0010998	regulation of translational initiation by eIF2 alpha phosphorylation	0.140192	-1.96474	0.69446	3	1	0.00186567	536	10917	39071	Hsp67Bc
	GO:0010032	meiotic chromosome condensation	0.140192	-1.96474	0.69446	3	1	0.00186567	536	10917	37188	Topors
	GO:0008291	acetylcholine metabolic process	0.140192	-1.96474	0.69446	3	1	0.00186567	536	10917	41625	Ace
	GO:0072148	epithelial cell fate commitment	0.140192	-1.96474	0.69446	3	1	0.00186567	536	10917	31391	peb
	GO:0050914	sensory perception of salty taste	0.140192	-1.96474	0.69446	3	1	0.00186567	536	10917	2768858	dpr
	GO:0035321	maintenance of imaginal disc-derived wing hair orientation	0.140192	-1.96474	0.69446	3	1	0.00186567	536	10917	34927	Gli
	GO:0043555	regulation of translation in response to stress	0.140192	-1.96474	0.69446	3	1	0.00186567	536	10917	39071	Hsp67Bc
	GO:0032233	positive regulation of actin filament bundle assembly	0.140192	-1.96474	0.69446	3	1	0.00186567	536	10917	39004	Fhos
	GO:0051125	regulation of actin nucleation	0.140192	-1.96474	0.69446	3	1	0.00186567	536	10917	49701	gish
	GO:0010810	regulation of cell-substrate adhesion	0.140192	-1.96474	0.69446	3	1	0.00186567	536	10917	39004	Fhos
	GO:0046825	regulation of protein export from nucleus	0.140192	-1.96474	0.69446	3	1	0.00186567	536	10917	45821	Abl
	GO:0061330	Malpighian tubule stellate cell differentiation	0.140192	-1.96474	0.69446	3	1	0.00186567	536	10917	44129	hbs
	GO:0030517	negative regulation of axon extension	0.140192	-1.96474	0.69446	3	1	0.00186567	536	10917	3772396	seq
	GO:0045682	regulation of epidermis development	0.140192	-1.96474	0.69446	3	1	0.00186567	536	10917	49701	gish
	GO:0046485	ether lipid metabolic process	0.140192	-1.96474	0.69446	3	1	0.00186567	536	10917	36669	CG10253
	GO:0048674	collateral sprouting of injured axon	0.140192	-1.96474	0.69446	3	1	0.00186567	536	10917	40143	wnd
	GO:0032351	negative regulation of hormone metabolic process	0.140192	-1.96474	0.69446	3	1	0.00186567	536	10917	38961	Cbl
	GO:0001555	oocyte growth	0.140192	-1.96474	0.69446	3	1	0.00186567	536	10917	40462	Hem
	GO:0046504	glycerol ether biosynthetic process	0.140192	-1.96474	0.69446	3	1	0.00186567	536	10917	36669	CG10253
	GO:0046464	acylglycerol catabolic process	0.140192	-1.96474	0.69446	3	1	0.00186567	536	10917	32436	dob
	GO:0019433	triglyceride catabolic process	0.140192	-1.96474	0.69446	3	1	0.00186567	536	10917	32436	dob
	GO:0007393	dorsal closure, leading edge cell fate determination	0.140192	-1.96474	0.69446	3	1	0.00186567	536	10917	31391	peb
	GO:0035154	terminal cell fate specification, open tracheal system	0.140192	-1.96474	0.69446	3	1	0.00186567	536	10917	3772396	seq
	GO:0046339	diacylglycerol metabolic process	0.140192	-1.96474	0.69446	3	1	0.00186567	536	10917	31245	Seipin
	GO:0035029	dorsal closure, leading edge cell fate commitment	0.140192	-1.96474	0.69446	3	1	0.00186567	536	10917	31391	peb
	GO:0007634	optokinetic behavior	0.140192	-1.96474	0.69446	3	1	0.00186567	536	10917	41247	Syn
	GO:0035638	signal maturation	0.140192	-1.96474	0.69446	3	1	0.00186567	536	10917	38168	rho
	GO:0052128	positive energy taxis	0.140192	-1.96474	0.69446	3	1	0.00186567	536	10917	40383	M6
	GO:0097384	cellular lipid biosynthetic process	0.140192	-1.96474	0.69446	3	1	0.00186567	536	10917	36669	CG10253
	GO:0010565	regulation of cellular ketone metabolic process	0.140192	-1.96474	0.69446	3	1	0.00186567	536	10917	39999	Eip75B
	GO:0035495	regulation of SNARE complex disassembly	0.140192	-1.96474	0.69446	3	1	0.00186567	536	10917	47091	comt
	GO:1901503	ether biosynthetic process	0.140192	-1.96474	0.69446	3	1	0.00186567	536	10917	36669	CG10253
	GO:0071632	optomotor response	0.140192	-1.96474	0.69446	3	1	0.00186567	536	10917	41247	Syn
	GO:0035540	positive regulation of SNARE complex disassembly	0.140192	-1.96474	0.69446	3	1	0.00186567	536	10917	47091	comt
	GO:2000039	regulation of trichome morphogenesis	0.140192	-1.96474	0.69446	3	1	0.00186567	536	10917	49701	gish
	GO:0045604	regulation of epidermal cell differentiation	0.140192	-1.96474	0.69446	3	1	0.00186567	536	10917	49701	gish
	GO:0032924	activin receptor signaling pathway	0.140192	-1.96474	0.69446	3	1	0.00186567	536	10917	35900	babo
	GO:0036065	fucosylation	0.140192	-1.96474	0.69446	3	1	0.00186567	536	10917	39653	FucTA
	GO:0050795	regulation of behavior	0.141361	-1.95644	0.69967	72	6	0.011194	536	10917	3.56462e+30	Gadd45,Liprin-alpha,Tbh,CadN,Lar,Sema-1a
	GO:0007362	terminal region determination	0.144544	-1.93417	0.71365	27	3	0.00559701	536	10917	436564527831391	tll,csw,peb
	GO:0031346	positive regulation of cell projection organization	0.144544	-1.93417	0.71365	27	3	0.00559701	536	10917	372014071531075	ena,kat-60L1,DAAM
	GO:1901214	regulation of neuron death	0.144544	-1.93417	0.71365	27	3	0.00559701	536	10917	5.74054e+16	futsch,grim,Appl
	GO:0023056	positive regulation of signaling	0.146111	-1.92339	0.71943	244	16	0.0298507	536	10917	3.80824e+80	ebd1,stan,babo,CG42674,MESK2,alpha-Spec,Tsp86D,step,jeb,rdx,Sulf1,hbs,CG9098,rho,neur,Krn
	GO:0098722	asymmetric stem cell division	0.1468	-1.91868	0.71943	57	5	0.00932836	536	10917	3.51974e+24	brat,sdt,Gbeta13F,loco,pros
	GO:0006582	melanin metabolic process	0.1468	-1.91868	0.71943	57	5	0.00932836	536	10917	4.02494e+24	RhoBTB,DCX-EMAP,grim,Cdk5alpha,Eph
	GO:0031401	positive regulation of protein modification process	0.1468	-1.91868	0.71943	57	5	0.00932836	536	10917	3.59004e+25	babo,Dap160,step,Src64B,Krn
	GO:0010941	regulation of cell death	0.147897	-1.91124	0.71943	174	12	0.0223881	536	10917	3.75163e+61	GlcT-1,Appl,aos,Csk,futsch,rdx,lz,grim,Cbl,csw,Apc,Eip93F
	GO:0072001	renal system development	0.148079	-1.91001	0.71943	73	6	0.011194	536	10917	4.48494e+29	pnr,hbs,kirre,crb,svp,rho
	GO:0043087	regulation of GTPase activity	0.148079	-1.91001	0.71943	73	6	0.011194	536	10917	3.46334e+29	Ced-12,SIDL,RN-tre,CG5337,RhoGAP93B,plx
	GO:0033124	regulation of GTP catabolic process	0.148079	-1.91001	0.71943	73	6	0.011194	536	10917	3.46334e+29	Ced-12,SIDL,RN-tre,CG5337,RhoGAP93B,plx
	GO:0001655	urogenital system development	0.148079	-1.91001	0.71943	73	6	0.011194	536	10917	4.48494e+29	pnr,hbs,kirre,crb,svp,rho
	GO:0048805	imaginal disc-derived genitalia morphogenesis	0.148483	-1.90729	0.71943	14	2	0.00373134	536	10917	3341831364	Rab5,Fas2
	GO:0035126	post-embryonic genitalia morphogenesis	0.148483	-1.90729	0.71943	14	2	0.00373134	536	10917	3341831364	Rab5,Fas2
	GO:0032319	regulation of Rho GTPase activity	0.148483	-1.90729	0.71943	14	2	0.00373134	536	10917	3463342496	Ced-12,RhoGAP93B
	GO:0009743	response to carbohydrate	0.148483	-1.90729	0.71943	14	2	0.00373134	536	10917	4314635402	boss,Mio
	GO:0034976	response to endoplasmic reticulum stress	0.148483	-1.90729	0.71943	14	2	0.00373134	536	10917	4235834385	Ire1,Cdk5alpha
	GO:0090162	establishment of epithelial cell polarity	0.148483	-1.90729	0.71943	14	2	0.00373134	536	10917	3124842896	sgg,crb
	GO:0043524	negative regulation of neuron apoptotic process	0.148483	-1.90729	0.71943	14	2	0.00373134	536	10917	574054440014	futsch,grim
	GO:0048803	imaginal disc-derived male genitalia morphogenesis	0.148483	-1.90729	0.71943	14	2	0.00373134	536	10917	3341831364	Rab5,Fas2
	GO:0016056	rhodopsin mediated signaling pathway	0.148483	-1.90729	0.71943	14	2	0.00373134	536	10917	4395036897	CdsA,inaC
	GO:0010002	cardioblast differentiation	0.148483	-1.90729	0.71943	14	2	0.00373134	536	10917	4484941491	pnr,svp
	GO:0035019	somatic stem cell maintenance	0.148483	-1.90729	0.71943	14	2	0.00373134	536	10917	3124836555	sgg,mam
	GO:0032434	regulation of proteasomal ubiquitin-dependent protein catabolic process	0.148483	-1.90729	0.71943	14	2	0.00373134	536	10917	3124842896	sgg,crb
	GO:0007432	salivary gland boundary specification	0.148483	-1.90729	0.71943	14	2	0.00373134	536	10917	3670338168	unc-5,rho
	GO:0033500	carbohydrate homeostasis	0.148483	-1.90729	0.71943	14	2	0.00373134	536	10917	4314635402	boss,Mio
	GO:0046328	regulation of JNK cascade	0.149413	-1.90104	0.72218	42	4	0.00746269	536	10917	4.17043e+19	rdx,sgg,Aplip1,peb
	GO:0034248	regulation of cellular amide metabolic process	0.149413	-1.90104	0.72218	42	4	0.00746269	536	10917	4.48493e+19	pnr,wisp,ird1,PGRP-LC
	GO:0002805	regulation of antimicrobial peptide biosynthetic process	0.149413	-1.90104	0.72218	42	4	0.00746269	536	10917	4.48493e+19	pnr,wisp,ird1,PGRP-LC
	GO:0008285	negative regulation of cell proliferation	0.154618	-1.86679	0.74674	58	5	0.00932836	536	10917	3.51973e+24	brat,Rab5,pros,CG13284,Csk
	GO:0060438	trachea development	0.156346	-1.85569	0.75265	28	3	0.00559701	536	10917	390044395048971	Fhos,CdsA,Atpalpha
	GO:0006576	cellular biogenic amine metabolic process	0.156346	-1.85569	0.75265	28	3	0.00559701	536	10917	317183127141625	Tbh,w,Ace
	GO:0044106	cellular amine metabolic process	0.156346	-1.85569	0.75265	28	3	0.00559701	536	10917	317183127141625	Tbh,w,Ace
	GO:0009308	amine metabolic process	0.156346	-1.85569	0.75265	28	3	0.00559701	536	10917	317183127141625	Tbh,w,Ace
	GO:0002700	regulation of production of molecular mediator of immune response	0.158779	-1.84024	0.76069	43	4	0.00746269	536	10917	4.48493e+19	pnr,wisp,ird1,PGRP-LC
	GO:0002784	regulation of antimicrobial peptide production	0.158779	-1.84024	0.76069	43	4	0.00746269	536	10917	4.48493e+19	pnr,wisp,ird1,PGRP-LC
	GO:0007379	segment specification	0.158779	-1.84024	0.76069	43	4	0.00746269	536	10917	3.17817e+20	CG32006,slp2,slp1,dan
	GO:0070302	regulation of stress-activated protein kinase signaling cascade	0.158779	-1.84024	0.76069	43	4	0.00746269	536	10917	4.17043e+19	rdx,sgg,Aplip1,peb
	GO:0032872	regulation of stress-activated MAPK cascade	0.158779	-1.84024	0.76069	43	4	0.00746269	536	10917	4.17043e+19	rdx,sgg,Aplip1,peb
	GO:0045746	negative regulation of Notch signaling pathway	0.158779	-1.84024	0.76069	43	4	0.00746269	536	10917	3.61254e+19	stan,Dap160,crb,Tom
	GO:0051247	positive regulation of protein metabolic process	0.159056	-1.8385	0.76141	91	7	0.0130597	536	10917	4.06443e+35	7B2,sgg,babo,Dap160,step,Src64B,Krn
	GO:0030811	regulation of nucleotide catabolic process	0.161935	-1.82056	0.77333	75	6	0.011194	536	10917	3.46334e+29	Ced-12,SIDL,RN-tre,CG5337,RhoGAP93B,plx
	GO:0033121	regulation of purine nucleotide catabolic process	0.161935	-1.82056	0.77333	75	6	0.011194	536	10917	3.46334e+29	Ced-12,SIDL,RN-tre,CG5337,RhoGAP93B,plx
	GO:0009118	regulation of nucleoside metabolic process	0.161935	-1.82056	0.77333	75	6	0.011194	536	10917	3.46334e+29	Ced-12,SIDL,RN-tre,CG5337,RhoGAP93B,plx
	GO:0008406	gonad development	0.162605	-1.81643	0.77529	59	5	0.00932836	536	10917	3.39164e+24	eya,ena,aop,inaC,robo3
	GO:0045137	development of primary sexual characteristics	0.162605	-1.81643	0.77529	59	5	0.00932836	536	10917	3.39164e+24	eya,ena,aop,inaC,robo3
	GO:1902582	single-organism intracellular transport	0.16425	-1.80637	0.78225	395	24	0.0447761	536	10917	4.18334e+121	SIDL,dila,didum,Aplip1,Kap3,Klp68D,unc-104,qtc,futsch,ena,Rab5,syd,Vps35,Unc-76,qua,klar,comt,mtm,g,p,CG9279,Abl,loco,kst
	GO:0051491	positive regulation of filopodium assembly	0.166026	-1.79561	0.78225	15	2	0.00373134	536	10917	3720131075	ena,DAAM
	GO:0009253	peptidoglycan catabolic process	0.166026	-1.79561	0.78225	15	2	0.00373134	536	10917	390633771920	PGRP-LC,PGRP-LD
	GO:0035296	regulation of tube diameter	0.166026	-1.79561	0.78225	15	2	0.00373134	536	10917	3136448971	Fas2,Atpalpha
	GO:0006027	glycosaminoglycan catabolic process	0.166026	-1.79561	0.78225	15	2	0.00373134	536	10917	390633771920	PGRP-LC,PGRP-LD
	GO:0007460	R8 cell fate commitment	0.166026	-1.79561	0.78225	15	2	0.00373134	536	10917	4323432039	ro,sev
	GO:0050708	regulation of protein secretion	0.166026	-1.79561	0.78225	15	2	0.00373134	536	10917	4485640288	ru,cmpy
	GO:0007509	mesoderm migration involved in gastrulation	0.166026	-1.79561	0.78225	15	2	0.00373134	536	10917	3263736295	mthl1,jeb
	GO:1902743	regulation of lamellipodium organization	0.166026	-1.79561	0.78225	15	2	0.00373134	536	10917	3720142986	ena,ssh
	GO:0048808	male genitalia morphogenesis	0.166026	-1.79561	0.78225	15	2	0.00373134	536	10917	3341831364	Rab5,Fas2
	GO:0090598	male anatomical structure morphogenesis	0.166026	-1.79561	0.78225	15	2	0.00373134	536	10917	3341831364	Rab5,Fas2
	GO:0032012	regulation of ARF protein signal transduction	0.166026	-1.79561	0.78225	15	2	0.00373134	536	10917	3153735425	CG5937,step
	GO:0061136	regulation of proteasomal protein catabolic process	0.166026	-1.79561	0.78225	15	2	0.00373134	536	10917	3124842896	sgg,crb
	GO:0010591	regulation of lamellipodium assembly	0.166026	-1.79561	0.78225	15	2	0.00373134	536	10917	3720142986	ena,ssh
	GO:0000270	peptidoglycan metabolic process	0.166026	-1.79561	0.78225	15	2	0.00373134	536	10917	390633771920	PGRP-LC,PGRP-LD
	GO:0009266	response to temperature stimulus	0.166332	-1.79377	0.78245	126	9	0.016791	536	10917	4.39504e+44	CdsA,tipE,Atf-2,Atpalpha,rdgC,HisCl1,Syn,Hsp67Bc,loco
	GO:0035239	tube morphogenesis	0.166332	-1.79377	0.78245	126	9	0.016791	536	10917	4.39504e+46	CdsA,crb,svp,seq,Mmp2,csw,sty,rho,klar
	GO:0030203	glycosaminoglycan metabolic process	0.168433	-1.78122	0.79047	29	3	0.00559701	536	10917	3.60794e+16	CG12913,PGRP-LC,PGRP-LD
	GO:0040023	establishment of nucleus localization	0.168433	-1.78122	0.79047	29	3	0.00559701	536	10917	321523849138067	wisp,ens,klar
	GO:0045197	establishment or maintenance of epithelial cell apical/basal polarity	0.168433	-1.78122	0.79047	29	3	0.00559701	536	10917	448614289641398	sdt,crb,Csk
	GO:0048864	stem cell development	0.169065	-1.77747	0.79281	76	6	0.011194	536	10917	3.12484e+29	sgg,AGO1,mam,aret,msi,neur
	GO:0051336	regulation of hydrolase activity	0.170225	-1.77063	0.79761	144	10	0.0186567	536	10917	4.18333e+49	SIDL,CG5337,Ced-12,RN-tre,hbs,7B2,RhoGAP93B,plx,ens,Eip93F
	GO:0002520	immune system development	0.170754	-1.76753	0.79761	60	5	0.00932836	536	10917	3.42774e+25	gcm,pnr,lz,Tsp68C,gcm2
	GO:0060968	regulation of gene silencing	0.170754	-1.76753	0.79761	60	5	0.00932836	536	10917	4.14234e+24	l(3)neo38,g,p,blanks,Sdc
	GO:0046488	phosphatidylinositol metabolic process	0.170754	-1.76753	0.79761	60	5	0.00932836	536	10917	2.76889e+26	CG42271,CG10082,Pi4KIIalpha,Ipp,PIP5K59B
	GO:0048534	hematopoietic or lymphoid organ development	0.170754	-1.76753	0.79761	60	5	0.00932836	536	10917	3.42774e+25	gcm,pnr,lz,Tsp68C,gcm2
	GO:0015711	organic anion transport	0.171873	-1.761	0.80221	93	7	0.0130597	536	10917	3.29863e+34	CG12531,Oatp30B,CG42321,CG13646,w,sll,Eaat2
	GO:0010647	positive regulation of cell communication	0.172126	-1.75953	0.80276	251	16	0.0298507	536	10917	3.80824e+80	ebd1,stan,babo,CG42674,MESK2,alpha-Spec,Tsp86D,step,jeb,rdx,Sulf1,hbs,CG9098,rho,neur,Krn
	GO:0045927	positive regulation of growth	0.176324	-1.73543	0.81212	77	6	0.011194	536	10917	3.25514e+29	CycD,Ank2,babo,step,cac,Sdc
	GO:0001763	morphogenesis of a branching structure	0.179058	-1.72005	0.81212	61	5	0.00932836	536	10917	4.52784e+26	csw,CdsA,sty,rho,seq
	GO:0007294	germarium-derived oocyte fate determination	0.18078	-1.71047	0.81212	30	3	0.00559701	536	10917	445433654438231	enc,AGO1,alpha-Spec
	GO:0060491	regulation of cell projection assembly	0.18078	-1.71047	0.81212	30	3	0.00559701	536	10917	372013107542986	ena,DAAM,ssh
	GO:0031110	regulation of microtubule polymerization or depolymerization	0.18078	-1.71047	0.81212	30	3	0.00559701	536	10917	369783823141392	Patronin,alpha-Spec,Jupiter
	GO:0043508	negative regulation of JUN kinase activity	0.182418	-1.70145	0.81212	4	1	0.00186567	536	10917	31248	sgg
	GO:0032863	activation of Rac GTPase activity	0.182418	-1.70145	0.81212	4	1	0.00186567	536	10917	34633	Ced-12
	GO:0016057	regulation of membrane potential in photoreceptor cell	0.182418	-1.70145	0.81212	4	1	0.00186567	536	10917	31456	SK
	GO:0070193	synaptonemal complex organization	0.182418	-1.70145	0.81212	4	1	0.00186567	536	10917	42213	cona
	GO:0046883	regulation of hormone secretion	0.182418	-1.70145	0.81212	4	1	0.00186567	536	10917	42561	GABA-B-R2
	GO:0046146	tetrahydrobiopterin metabolic process	0.182418	-1.70145	0.81212	4	1	0.00186567	536	10917	43499	Pcd
	GO:0030728	ovulation	0.182418	-1.70145	0.81212	4	1	0.00186567	536	10917	31718	Tbh
	GO:0016062	adaptation of rhodopsin mediated signaling	0.182418	-1.70145	0.81212	4	1	0.00186567	536	10917	36897	inaC
	GO:0045446	endothelial cell differentiation	0.182418	-1.70145	0.81212	4	1	0.00186567	536	10917	34927	Gli
	GO:0033363	secretory granule organization	0.182418	-1.70145	0.81212	4	1	0.00186567	536	10917	40670	Pi4KIIalpha
	GO:0035044	sperm aster formation	0.182418	-1.70145	0.81212	4	1	0.00186567	536	10917	32152	wisp
	GO:0090163	establishment of epithelial cell planar polarity	0.182418	-1.70145	0.81212	4	1	0.00186567	536	10917	31248	sgg
	GO:0030721	spectrosome organization	0.182418	-1.70145	0.81212	4	1	0.00186567	536	10917	38231	alpha-Spec
	GO:0032862	activation of Rho GTPase activity	0.182418	-1.70145	0.81212	4	1	0.00186567	536	10917	34633	Ced-12
	GO:0036367	light adaption	0.182418	-1.70145	0.81212	4	1	0.00186567	536	10917	36897	inaC
	GO:0046855	inositol phosphate dephosphorylation	0.182418	-1.70145	0.81212	4	1	0.00186567	536	10917	41701	Ipp
	GO:0070059	intrinsic apoptotic signaling pathway in response to endoplasmic reticulum stress	0.182418	-1.70145	0.81212	4	1	0.00186567	536	10917	34385	Cdk5alpha
	GO:0034058	endosomal vesicle fusion	0.182418	-1.70145	0.81212	4	1	0.00186567	536	10917	33418	Rab5
	GO:0040016	embryonic cleavage	0.182418	-1.70145	0.81212	4	1	0.00186567	536	10917	35330	Cen
	GO:0001885	endothelial cell development	0.182418	-1.70145	0.81212	4	1	0.00186567	536	10917	34927	Gli
	GO:0042994	cytoplasmic sequestering of transcription factor	0.182418	-1.70145	0.81212	4	1	0.00186567	536	10917	34719	CG9426
	GO:0032528	microvillus organization	0.182418	-1.70145	0.81212	4	1	0.00186567	536	10917	43528	Cad99C
	GO:0031112	positive regulation of microtubule polymerization or depolymerization	0.182418	-1.70145	0.81212	4	1	0.00186567	536	10917	41392	Jupiter
	GO:0006729	tetrahydrobiopterin biosynthetic process	0.182418	-1.70145	0.81212	4	1	0.00186567	536	10917	43499	Pcd
	GO:0009303	rRNA transcription	0.182418	-1.70145	0.81212	4	1	0.00186567	536	10917	35197	brat
	GO:0071545	inositol phosphate catabolic process	0.182418	-1.70145	0.81212	4	1	0.00186567	536	10917	41701	Ipp
	GO:0034284	response to monosaccharide	0.182418	-1.70145	0.81212	4	1	0.00186567	536	10917	43146	boss
	GO:0008056	ocellus development	0.182418	-1.70145	0.81212	4	1	0.00186567	536	10917	35077	rdo
	GO:0035211	spermathecum morphogenesis	0.182418	-1.70145	0.81212	4	1	0.00186567	536	10917	31883	lz
	GO:0033627	cell adhesion mediated by integrin	0.182418	-1.70145	0.81212	4	1	0.00186567	536	10917	40704	plx
	GO:0046688	response to copper ion	0.182418	-1.70145	0.81212	4	1	0.00186567	536	10917	39089	MTF-1
	GO:0042136	neurotransmitter biosynthetic process	0.182418	-1.70145	0.81212	4	1	0.00186567	536	10917	31718	Tbh
	GO:0045921	positive regulation of exocytosis	0.182418	-1.70145	0.81212	4	1	0.00186567	536	10917	38786	corn
	GO:0035157	negative regulation of fusion cell fate specification	0.182418	-1.70145	0.81212	4	1	0.00186567	536	10917	33392	aop
	GO:1903053	regulation of extracellular matrix organization	0.182418	-1.70145	0.81212	4	1	0.00186567	536	10917	33022	obst-A
	GO:0003158	endothelium development	0.182418	-1.70145	0.81212	4	1	0.00186567	536	10917	34927	Gli
	GO:0042992	negative regulation of transcription factor import into nucleus	0.182418	-1.70145	0.81212	4	1	0.00186567	536	10917	34719	CG9426
	GO:0031103	axon regeneration	0.182418	-1.70145	0.81212	4	1	0.00186567	536	10917	40143	wnd
	GO:0019985	translesion synthesis	0.182418	-1.70145	0.81212	4	1	0.00186567	536	10917	40965	DNApol-iota
	GO:0007429	secondary branching, open tracheal system	0.182418	-1.70145	0.81212	4	1	0.00186567	536	10917	38424	sty
	GO:0061448	connective tissue development	0.182418	-1.70145	0.81212	4	1	0.00186567	536	10917	41491	svp
	GO:0023058	adaptation of signaling pathway	0.182418	-1.70145	0.81212	4	1	0.00186567	536	10917	36897	inaC
	GO:0046680	response to DDT	0.182418	-1.70145	0.81212	4	1	0.00186567	536	10917	32619	para
	GO:0051703	intraspecies interaction between organisms	0.182418	-1.70145	0.81212	4	1	0.00186567	536	10917	45338	na
	GO:0048025	negative regulation of mRNA splicing, via spliceosome	0.182418	-1.70145	0.81212	4	1	0.00186567	536	10917	34370	Rsf1
	GO:0048227	plasma membrane to endosome transport	0.182418	-1.70145	0.81212	4	1	0.00186567	536	10917	33418	Rab5
	GO:0019896	axon transport of mitochondrion	0.182418	-1.70145	0.81212	4	1	0.00186567	536	10917	53472	Aplip1
	GO:0046885	regulation of hormone biosynthetic process	0.182418	-1.70145	0.81212	4	1	0.00186567	536	10917	38961	Cbl
	GO:0035176	social behavior	0.182418	-1.70145	0.81212	4	1	0.00186567	536	10917	45338	na
	GO:0060288	formation of a compartment boundary	0.182418	-1.70145	0.81212	4	1	0.00186567	536	10917	37201	ena
	GO:0035046	pronuclear migration	0.182418	-1.70145	0.81212	4	1	0.00186567	536	10917	32152	wisp
	GO:0031340	positive regulation of vesicle fusion	0.182418	-1.70145	0.81212	4	1	0.00186567	536	10917	40876	Syt4
	GO:0010884	positive regulation of lipid storage	0.182418	-1.70145	0.81212	4	1	0.00186567	536	10917	31245	Seipin
	GO:0046838	phosphorylated carbohydrate dephosphorylation	0.182418	-1.70145	0.81212	4	1	0.00186567	536	10917	41701	Ipp
	GO:0061099	negative regulation of protein tyrosine kinase activity	0.182418	-1.70145	0.81212	4	1	0.00186567	536	10917	38961	Cbl
	GO:0035170	lymph gland crystal cell differentiation	0.182418	-1.70145	0.81212	4	1	0.00186567	536	10917	31883	lz
	GO:0009950	dorsal/ventral axis specification	0.183707	-1.69441	0.81448	78	6	0.011194	536	10917	4.45434e+29	enc,Cbl,csw,CG32206,sll,loco
	GO:0006639	acylglycerol metabolic process	0.183903	-1.69335	0.81448	16	2	0.00373134	536	10917	3124532436	Seipin,dob
	GO:0030725	germline ring canal formation	0.183903	-1.69335	0.81448	16	2	0.00373134	536	10917	3823148973	alpha-Spec,Src64B
	GO:0006638	neutral lipid metabolic process	0.183903	-1.69335	0.81448	16	2	0.00373134	536	10917	3124532436	Seipin,dob
	GO:0035112	genitalia morphogenesis	0.183903	-1.69335	0.81448	16	2	0.00373134	536	10917	3341831364	Rab5,Fas2
	GO:0045494	photoreceptor cell maintenance	0.183903	-1.69335	0.81448	16	2	0.00373134	536	10917	4022442896	rdgC,crb
	GO:0045478	fusome organization	0.183903	-1.69335	0.81448	16	2	0.00373134	536	10917	3823148973	alpha-Spec,Src64B
	GO:0009967	positive regulation of signal transduction	0.184543	-1.68987	0.81671	236	15	0.0279851	536	10917	3.80824e+75	ebd1,stan,babo,CG42674,MESK2,Tsp86D,step,jeb,rdx,Sulf1,hbs,CG9098,rho,neur,Krn
	GO:0019725	cellular homeostasis	0.185976	-1.68214	0.82245	147	10	0.0186567	536	10917	4.34424e+49	Vha100-1,SP2353,Rab14,CG3408,Fhos,Ank2,Nrk,MTF-1,Seipin,CG18130
	GO:0032507	maintenance of protein location in cell	0.188087	-1.67085	0.83056	46	4	0.00746269	536	10917	3.88633e+19	Ank2,CG9121,CG9426,klar
	GO:0033993	response to lipid	0.188087	-1.67085	0.83056	46	4	0.00746269	536	10917	4.36564e+19	tll,Eip75B,svp,Eip93F
	GO:0071482	cellular response to light stimulus	0.193362	-1.64319	0.85071	31	3	0.00559701	536	10917	439503689735620	CdsA,inaC,Tsp42Ej
	GO:0030716	oocyte fate determination	0.193362	-1.64319	0.85071	31	3	0.00559701	536	10917	445433654438231	enc,AGO1,alpha-Spec
	GO:0006869	lipid transport	0.193362	-1.64319	0.85071	31	3	0.00559701	536	10917	333743648838067	Npc2a,CG42321,klar
	GO:0043244	regulation of protein complex disassembly	0.193362	-1.64319	0.85071	31	3	0.00559701	536	10917	470913697838231	comt,Patronin,alpha-Spec
	GO:0051090	regulation of sequence-specific DNA binding transcription factor activity	0.193362	-1.64319	0.85071	31	3	0.00559701	536	10917	3178173360833600	CG32006,slp2,slp1
	GO:0009798	axis specification	0.193886	-1.64048	0.85239	202	13	0.0242537	536	10917	3.56804e+64	didum,sll,sev,enc,tll,slp1,Cbl,dos,CG32206,csw,sty,loco,peb
	GO:0055002	striated muscle cell development	0.19822	-1.61838	0.86761	47	4	0.00746269	536	10917	3.33923e+19	aop,DAAM,sty,ens
	GO:0055001	muscle cell development	0.19822	-1.61838	0.86761	47	4	0.00746269	536	10917	3.33923e+19	aop,DAAM,sty,ens
	GO:0036465	synaptic vesicle recycling	0.19822	-1.61838	0.86761	47	4	0.00746269	536	10917	3.34184e+21	Rab5,Dap160,stnB,unc-104
	GO:0048488	synaptic vesicle endocytosis	0.19822	-1.61838	0.86761	47	4	0.00746269	536	10917	3.34184e+21	Rab5,Dap160,stnB,unc-104
	GO:0007219	Notch signaling pathway	0.19822	-1.61838	0.86761	47	4	0.00746269	536	10917	3.12293e+19	boi,sgg,mam,Tom
	GO:0030003	cellular cation homeostasis	0.19822	-1.61838	0.86761	47	4	0.00746269	536	10917	4.34423e+19	Vha100-1,Rab14,Seipin,MTF-1
	GO:0006952	defense response	0.201089	-1.60401	0.87534	332	20	0.0373134	536	10917	3.97063e+100	Eig71Ee,Npc2a,PGRP-LC,Cdk5alpha,RhoBTB,DCX-EMAP,CG12004,eya,drpr,SP2353,bbg,CG30098,Rab14,Eph,gcm,LysX,lz,IM23,grim,loco
	GO:0015850	organic hydroxy compound transport	0.202036	-1.59931	0.87534	17	2	0.00373134	536	10917	3337436849	Npc2a,DAT
	GO:0035082	axoneme assembly	0.202036	-1.59931	0.87534	17	2	0.00373134	536	10917	3601032071	dila,Kap3
	GO:0016059	deactivation of rhodopsin mediated signaling	0.202036	-1.59931	0.87534	17	2	0.00373134	536	10917	4022436897	rdgC,inaC
	GO:0043523	regulation of neuron apoptotic process	0.202036	-1.59931	0.87534	17	2	0.00373134	536	10917	574054440014	futsch,grim
	GO:0060857	establishment of glial blood-brain barrier	0.202036	-1.59931	0.87534	17	2	0.00373134	536	10917	3427742672	gcm,loco
	GO:0007016	cytoskeletal anchoring at plasma membrane	0.202036	-1.59931	0.87534	17	2	0.00373134	536	10917	3886333732	Ank2,CG9121
	GO:0006469	negative regulation of protein kinase activity	0.202036	-1.59931	0.87534	17	2	0.00373134	536	10917	3124838961	sgg,Cbl
	GO:0033673	negative regulation of kinase activity	0.202036	-1.59931	0.87534	17	2	0.00373134	536	10917	3124838961	sgg,Cbl
	GO:0043063	intercellular bridge organization	0.202036	-1.59931	0.87534	17	2	0.00373134	536	10917	3823148973	alpha-Spec,Src64B
	GO:0072348	sulfur compound transport	0.202036	-1.59931	0.87534	17	2	0.00373134	536	10917	4211533247	sll,Eaat2
	GO:0007392	initiation of dorsal closure	0.202036	-1.59931	0.87534	17	2	0.00373134	536	10917	3139131667	peb,Dok
	GO:0030166	proteoglycan biosynthetic process	0.202036	-1.59931	0.87534	17	2	0.00373134	536	10917	3607942115	CG12913,sll
	GO:0022400	regulation of rhodopsin mediated signaling pathway	0.202036	-1.59931	0.87534	17	2	0.00373134	536	10917	4022436897	rdgC,inaC
	GO:0016246	RNA interference	0.206152	-1.57914	0.8906	32	3	0.00559701	536	10917	365443862033509	AGO1,blanks,CG17265
	GO:0051494	negative regulation of cytoskeleton organization	0.206152	-1.57914	0.8906	32	3	0.00559701	536	10917	497013697838231	gish,Patronin,alpha-Spec
	GO:0048806	genitalia development	0.206152	-1.57914	0.8906	32	3	0.00559701	536	10917	318833341831364	lz,Rab5,Fas2
	GO:0009636	response to toxic substance	0.206152	-1.57914	0.8906	32	3	0.00559701	536	10917	358323261941625	mtt,para,Ace
	GO:0051241	negative regulation of multicellular organismal process	0.208514	-1.56775	0.89667	48	4	0.00746269	536	10917	3.33924e+19	aop,ro,crb,sdk
	GO:0035317	imaginal disc-derived wing hair organization	0.208514	-1.56775	0.89667	48	4	0.00746269	536	10917	3.87553e+19	tow,Gli,qua,fw
	GO:0030718	germ-line stem cell maintenance	0.208514	-1.56775	0.89667	48	4	0.00746269	536	10917	3.65444e+19	AGO1,mam,aret,neur
	GO:0048284	organelle fusion	0.208514	-1.56775	0.89667	48	4	0.00746269	536	10917	4.70913e+19	comt,wisp,Rab5,Syx13
	GO:0002759	regulation of antimicrobial humoral response	0.208514	-1.56775	0.89667	48	4	0.00746269	536	10917	4.48493e+19	pnr,wisp,ird1,PGRP-LC
	GO:0030097	hemopoiesis	0.208514	-1.56775	0.89667	48	4	0.00746269	536	10917	3.42773e+20	gcm,lz,Tsp68C,gcm2
	GO:0009952	anterior/posterior pattern specification	0.208609	-1.56729	0.89667	169	11	0.0205224	536	10917	3.56804e+54	didum,Cad99C,sev,ena,tll,slp1,csw,dos,sty,retn,peb
	GO:0060562	epithelial tube morphogenesis	0.212814	-1.54734	0.91409	99	7	0.0130597	536	10917	4.52784e+36	csw,CdsA,crb,sty,svp,rho,seq
	GO:0002920	regulation of humoral immune response	0.218957	-1.51888	0.91579	49	4	0.00746269	536	10917	4.48493e+19	pnr,wisp,ird1,PGRP-LC
	GO:0035315	hair cell differentiation	0.218957	-1.51888	0.91579	49	4	0.00746269	536	10917	3.87553e+19	tow,Gli,qua,fw
	GO:0035316	non-sensory hair organization	0.218957	-1.51888	0.91579	49	4	0.00746269	536	10917	3.87553e+19	tow,Gli,qua,fw
	GO:0015698	inorganic anion transport	0.219128	-1.5181	0.91579	33	3	0.00559701	536	10917	414263107133109	HisCl1,CG3638,tty
	GO:0055088	lipid homeostasis	0.219128	-1.5181	0.91579	33	3	0.00559701	536	10917	431463337435402	boss,Npc2a,Mio
	GO:0030706	germarium-derived oocyte differentiation	0.219128	-1.5181	0.91579	33	3	0.00559701	536	10917	445433654438231	enc,AGO1,alpha-Spec
	GO:0048639	positive regulation of developmental growth	0.219128	-1.5181	0.91579	33	3	0.00559701	536	10917	388633215837447	Ank2,cac,Sdc
	GO:0006378	mRNA polyadenylation	0.22036	-1.51249	0.91579	18	2	0.00373134	536	10917	3215234648	wisp,aret
	GO:0007483	genital disc morphogenesis	0.22036	-1.51249	0.91579	18	2	0.00373134	536	10917	3341831364	Rab5,Fas2
	GO:0006029	proteoglycan metabolic process	0.22036	-1.51249	0.91579	18	2	0.00373134	536	10917	3607942115	CG12913,sll
	GO:0030539	male genitalia development	0.22036	-1.51249	0.91579	18	2	0.00373134	536	10917	3341831364	Rab5,Fas2
	GO:0001895	retina homeostasis	0.22036	-1.51249	0.91579	18	2	0.00373134	536	10917	4022442896	rdgC,crb
	GO:1903362	regulation of cellular protein catabolic process	0.22036	-1.51249	0.91579	18	2	0.00373134	536	10917	3124842896	sgg,crb
	GO:0045792	negative regulation of cell size	0.22036	-1.51249	0.91579	18	2	0.00373134	536	10917	3274334192	RhoGAPp190,Sema-1a
	GO:0045807	positive regulation of endocytosis	0.22036	-1.51249	0.91579	18	2	0.00373134	536	10917	3971742567	comm,CASK
	GO:0046854	phosphatidylinositol phosphorylation	0.22036	-1.51249	0.91579	18	2	0.00373134	536	10917	4067041701	Pi4KIIalpha,Ipp
	GO:1903050	regulation of proteolysis involved in cellular protein catabolic process	0.22036	-1.51249	0.91579	18	2	0.00373134	536	10917	3124842896	sgg,crb
	GO:0035289	posterior head segmentation	0.22036	-1.51249	0.91579	18	2	0.00373134	536	10917	3427733607	gcm,slp1
	GO:0007526	larval somatic muscle development	0.22036	-1.51249	0.91579	18	2	0.00373134	536	10917	3391636258	eya,ths
	GO:0060071	Wnt signaling pathway, planar cell polarity pathway	0.222574	-1.50249	0.91579	5	1	0.00186567	536	10917	45821	Abl
	GO:0060260	regulation of transcription initiation from RNA polymerase II promoter	0.222574	-1.50249	0.91579	5	1	0.00186567	536	10917	37471	NC2alpha
	GO:0007500	mesodermal cell fate determination	0.222574	-1.50249	0.91579	5	1	0.00186567	536	10917	36555	mam
	GO:1901799	negative regulation of proteasomal protein catabolic process	0.222574	-1.50249	0.91579	5	1	0.00186567	536	10917	42896	crb
	GO:0043200	response to amino acid	0.222574	-1.50249	0.91579	5	1	0.00186567	536	10917	41625	Ace
	GO:2000289	regulation of photoreceptor cell axon guidance	0.222574	-1.50249	0.91579	5	1	0.00186567	536	10917	34192	Sema-1a
	GO:0006622	protein targeting to lysosome	0.222574	-1.50249	0.91579	5	1	0.00186567	536	10917	41025	p
	GO:0046665	amnioserosa maintenance	0.222574	-1.50249	0.91579	5	1	0.00186567	536	10917	31391	peb
	GO:0021556	central nervous system formation	0.222574	-1.50249	0.91579	5	1	0.00186567	536	10917	43023	dan
	GO:0051180	vitamin transport	0.222574	-1.50249	0.91579	5	1	0.00186567	536	10917	31380	CG3556
	GO:0051220	cytoplasmic sequestering of protein	0.222574	-1.50249	0.91579	5	1	0.00186567	536	10917	34719	CG9426
	GO:0060148	positive regulation of posttranscriptional gene silencing	0.222574	-1.50249	0.91579	5	1	0.00186567	536	10917	37447	Sdc
	GO:0015937	coenzyme A biosynthetic process	0.222574	-1.50249	0.91579	5	1	0.00186567	536	10917	40846	Dpck
	GO:0033866	nucleoside bisphosphate biosynthetic process	0.222574	-1.50249	0.91579	5	1	0.00186567	536	10917	40846	Dpck
	GO:0007344	pronuclear fusion	0.222574	-1.50249	0.91579	5	1	0.00186567	536	10917	32152	wisp
	GO:0046663	dorsal closure, leading edge cell differentiation	0.222574	-1.50249	0.91579	5	1	0.00186567	536	10917	31391	peb
	GO:0016045	detection of bacterium	0.222574	-1.50249	0.91579	5	1	0.00186567	536	10917	39063	PGRP-LC
	GO:0032435	negative regulation of proteasomal ubiquitin-dependent protein catabolic process	0.222574	-1.50249	0.91579	5	1	0.00186567	536	10917	42896	crb
	GO:0008335	female germline ring canal stabilization	0.222574	-1.50249	0.91579	5	1	0.00186567	536	10917	48973	Src64B
	GO:0042177	negative regulation of protein catabolic process	0.222574	-1.50249	0.91579	5	1	0.00186567	536	10917	42896	crb
	GO:0055092	sterol homeostasis	0.222574	-1.50249	0.91579	5	1	0.00186567	536	10917	33374	Npc2a
	GO:0060964	regulation of gene silencing by miRNA	0.222574	-1.50249	0.91579	5	1	0.00186567	536	10917	37447	Sdc
	GO:0034033	purine nucleoside bisphosphate biosynthetic process	0.222574	-1.50249	0.91579	5	1	0.00186567	536	10917	40846	Dpck
	GO:0034198	cellular response to amino acid starvation	0.222574	-1.50249	0.91579	5	1	0.00186567	536	10917	41096	ird1
	GO:2000637	positive regulation of gene silencing by miRNA	0.222574	-1.50249	0.91579	5	1	0.00186567	536	10917	37447	Sdc
	GO:1903051	negative regulation of proteolysis involved in cellular protein catabolic process	0.222574	-1.50249	0.91579	5	1	0.00186567	536	10917	42896	crb
	GO:0034030	ribonucleoside bisphosphate biosynthetic process	0.222574	-1.50249	0.91579	5	1	0.00186567	536	10917	40846	Dpck
	GO:0030856	regulation of epithelial cell differentiation	0.222574	-1.50249	0.91579	5	1	0.00186567	536	10917	49701	gish
	GO:0045799	positive regulation of chromatin assembly or disassembly	0.222574	-1.50249	0.91579	5	1	0.00186567	536	10917	37978	Atf-2
	GO:0014015	positive regulation of gliogenesis	0.222574	-1.50249	0.91579	5	1	0.00186567	536	10917	34277	gcm
	GO:0035026	leading edge cell differentiation	0.222574	-1.50249	0.91579	5	1	0.00186567	536	10917	31391	peb
	GO:2000142	regulation of DNA-templated transcription, initiation	0.222574	-1.50249	0.91579	5	1	0.00186567	536	10917	37471	NC2alpha
	GO:0042682	regulation of compound eye cone cell fate specification	0.222574	-1.50249	0.91579	5	1	0.00186567	536	10917	43825	sv
	GO:0010824	regulation of centrosome duplication	0.222574	-1.50249	0.91579	5	1	0.00186567	536	10917	42443	CG15923
	GO:0030423	targeting of mRNA for destruction involved in RNA interference	0.222574	-1.50249	0.91579	5	1	0.00186567	536	10917	36544	AGO1
	GO:0098543	detection of other organism	0.222574	-1.50249	0.91579	5	1	0.00186567	536	10917	39063	PGRP-LC
	GO:0060252	positive regulation of glial cell proliferation	0.222574	-1.50249	0.91579	5	1	0.00186567	536	10917	34277	gcm
	GO:0031453	positive regulation of heterochromatin assembly	0.222574	-1.50249	0.91579	5	1	0.00186567	536	10917	37978	Atf-2
	GO:0060147	regulation of posttranscriptional gene silencing	0.222574	-1.50249	0.91579	5	1	0.00186567	536	10917	37447	Sdc
	GO:0046174	polyol catabolic process	0.222574	-1.50249	0.91579	5	1	0.00186567	536	10917	41701	Ipp
	GO:0007211	octopamine or tyramine signaling pathway	0.222574	-1.50249	0.91579	5	1	0.00186567	536	10917	31718	Tbh
	GO:0000741	karyogamy	0.222574	-1.50249	0.91579	5	1	0.00186567	536	10917	32152	wisp
	GO:0035295	tube development	0.222705	-1.50191	0.91579	208	13	0.0242537	536	10917	4.39504e+66	CdsA,crb,svp,seq,Mmp2,pnr,ths,hbs,csw,qm,sty,rho,klar
	GO:0045185	maintenance of protein location	0.229536	-1.4717	0.94258	50	4	0.00746269	536	10917	3.88633e+19	Ank2,CG9121,CG9426,klar
	GO:0002697	regulation of immune effector process	0.229536	-1.4717	0.94258	50	4	0.00746269	536	10917	4.48493e+19	pnr,wisp,ird1,PGRP-LC
	GO:0060548	negative regulation of cell death	0.23036	-1.46811	0.94531	84	6	0.011194	536	10917	5.74054e+31	futsch,GlcT-1,grim,Appl,csw,Apc
	GO:0043067	regulation of programmed cell death	0.230949	-1.46556	0.94643	155	10	0.0186567	536	10917	3.75164e+51	GlcT-1,aos,Csk,futsch,rdx,lz,grim,csw,Apc,Eip93F
	GO:0016567	protein ubiquitination	0.230949	-1.46556	0.94643	155	10	0.0186567	536	10917	3.75423e+49	ari-2,hiw,CG5087,CG9941,gol,Topors,rdx,Cbl,neur,CG13344
	GO:0007427	epithelial cell migration, open tracheal system	0.232264	-1.45988	0.95052	34	3	0.00559701	536	10917	448564527837447	ru,csw,Sdc
	GO:0007354	zygotic determination of anterior/posterior axis, embryo	0.232264	-1.45988	0.95052	34	3	0.00559701	536	10917	436564527831391	tll,csw,peb
	GO:0071702	organic substance transport	0.233162	-1.45602	0.95354	492	28	0.0522388	536	10917	3.33744e+142	Npc2a,RabX4,CG42321,didum,w,sll,qtc,Ent3,CG12531,Rab5,Vps35,CG43340,Syx13,klar,CG13646,Tango5,g,thoc5,DAT,Eaat2,stnB,Rab14,CG3556,Oatp30B,p,Apc,tamo,ltd
	GO:0035218	leg disc development	0.234519	-1.45022	0.95844	102	7	0.0130597	536	10917	4.48563e+34	ru,B-H1,CG42674,B-H2,Rab5,Bx,rho
	GO:0097193	intrinsic apoptotic signaling pathway	0.23881	-1.43209	0.96607	19	2	0.00373134	536	10917	4001434385	grim,Cdk5alpha
	GO:0051260	protein homooligomerization	0.23881	-1.43209	0.96607	19	2	0.00373134	536	10917	4709141085	comt,neur
	GO:0019751	polyol metabolic process	0.23881	-1.43209	0.96607	19	2	0.00373134	536	10917	4199741701	CG14883,Ipp
	GO:0032273	positive regulation of protein polymerization	0.23881	-1.43209	0.96607	19	2	0.00373134	536	10917	3107541392	DAAM,Jupiter
	GO:0007041	lysosomal transport	0.23881	-1.43209	0.96607	19	2	0.00373134	536	10917	4481941025	g,p
	GO:0060856	establishment of blood-brain barrier	0.23881	-1.43209	0.96607	19	2	0.00373134	536	10917	3427742672	gcm,loco
	GO:0060969	negative regulation of gene silencing	0.23881	-1.43209	0.96607	19	2	0.00373134	536	10917	4481941025	g,p
	GO:0046529	imaginal disc fusion, thorax closure	0.23881	-1.43209	0.96607	19	2	0.00373134	536	10917	3166735997	Dok,Mmp2
	GO:0007430	terminal branching, open tracheal system	0.23881	-1.43209	0.96607	19	2	0.00373134	536	10917	4395038424	CdsA,sty
	GO:0043631	RNA polyadenylation	0.23881	-1.43209	0.96607	19	2	0.00373134	536	10917	3215234648	wisp,aret
	GO:0046528	imaginal disc fusion	0.23881	-1.43209	0.96607	19	2	0.00373134	536	10917	3166735997	Dok,Mmp2
	GO:0046834	lipid phosphorylation	0.23881	-1.43209	0.96607	19	2	0.00373134	536	10917	4067041701	Pi4KIIalpha,Ipp
	GO:0046669	regulation of compound eye retinal cell programmed cell death	0.23881	-1.43209	0.96607	19	2	0.00373134	536	10917	3188344642	lz,Apc
	GO:0010950	positive regulation of endopeptidase activity	0.23881	-1.43209	0.96607	19	2	0.00373134	536	10917	4412944936	hbs,Eip93F
	GO:0051348	negative regulation of transferase activity	0.23881	-1.43209	0.96607	19	2	0.00373134	536	10917	3124838961	sgg,Cbl
	GO:0042752	regulation of circadian rhythm	0.240239	-1.42612	0.96922	51	4	0.00746269	536	10917	3.12485e+19	sgg,na,so,gl
	GO:0007274	neuromuscular synaptic transmission	0.240239	-1.42612	0.96922	51	4	0.00746269	536	10917	3.59775e+19	brp,comt,TBPH,alpha-Spec
	GO:0051651	maintenance of location in cell	0.240239	-1.42612	0.96922	51	4	0.00746269	536	10917	3.88633e+19	Ank2,CG9121,CG9426,klar
	GO:0009913	epidermal cell differentiation	0.240239	-1.42612	0.96922	51	4	0.00746269	536	10917	3.87553e+19	tow,Gli,qua,fw
	GO:0046148	pigment biosynthetic process	0.240924	-1.42327	0.97133	68	5	0.00932836	536	10917	3.98364e+24	st,g,p,w,ltd
	GO:0031329	regulation of cellular catabolic process	0.242797	-1.41553	0.97822	157	10	0.0186567	536	10917	4.18333e+49	SIDL,CG5337,crb,Ced-12,RN-tre,sgg,RhoGAP93B,Hsp67Bc,plx,ltd
	GO:0042326	negative regulation of phosphorylation	0.245537	-1.40431	0.9886	35	3	0.00559701	536	10917	312483896131391	sgg,Cbl,peb
	GO:0007349	cellularization	0.249381	-1.38877	1	104	7	0.0130597	536	10917	4.17044e+34	rdx,didum,blanks,gish,Rab5,Src64B,Sry-alpha
	GO:0051301	cell division	0.25042	-1.38461	1	478	27	0.0503731	536	10917	3.25444e+135	Gbeta13F,wuc,Sep4,msi,Nnf1b,Sry-alpha,sgg,sdt,Rab5,rho,Syx13,pros,Cen,brat,wisp,cona,Gli,thoc5,mam,rap,Topors,aret,enc,tll,neur,loco,kst
	GO:0002682	regulation of immune system process	0.252869	-1.37488	1	177	11	0.0205224	536	10917	3.21524e+54	wisp,PGRP-LC,SP2353,cpo,Mmp2,pnr,gcm,sgg,aop,ird1,gcm2
	GO:0001933	negative regulation of protein phosphorylation	0.257331	-1.35739	1	20	2	0.00373134	536	10917	3124838961	sgg,Cbl
	GO:0008363	larval chitin-based cuticle development	0.257331	-1.35739	1	20	2	0.00373134	536	10917	3124844642	sgg,Apc
	GO:0007603	phototransduction, visible light	0.257331	-1.35739	1	20	2	0.00373134	536	10917	4395036897	CdsA,inaC
	GO:0046668	regulation of retinal cell programmed cell death	0.257331	-1.35739	1	20	2	0.00373134	536	10917	3188344642	lz,Apc
	GO:0007390	germ-band shortening	0.257331	-1.35739	1	20	2	0.00373134	536	10917	3720131391	ena,peb
	GO:0051047	positive regulation of secretion	0.257331	-1.35739	1	20	2	0.00373134	536	10917	4485638786	ru,corn
	GO:0019932	second-messenger-mediated signaling	0.257331	-1.35739	1	20	2	0.00373134	536	10917	4022436897	rdgC,inaC
	GO:0033036	macromolecule localization	0.258827	-1.35159	1	596	33	0.0615672	536	10917	3.33744e+167	Npc2a,CG42321,Akap200,Rab5,Dap160,CG43340,Syx13,g,crb,CG9426,p,neur,didum,RabX4,Gbeta13F,Pi4KIIalpha,qtc,Ank2,sdt,CG9121,Vps35,pros,klar,wisp,Tango5,thoc5,gukh,Rab14,stnB,Apc,tamo,loco,ltd
	GO:0045747	positive regulation of Notch signaling pathway	0.258926	-1.35121	1	36	3	0.00559701	536	10917	441294131041085	hbs,Tsp86D,neur
	GO:0007224	smoothened signaling pathway	0.258926	-1.35121	1	36	3	0.00559701	536	10917	312294352839441	boi,Cad99C,mirr
	GO:0042714	dosage compensation complex assembly	0.260762	-1.34415	1	6	1	0.00186567	536	10917	38963	Unr
	GO:0051492	regulation of stress fiber assembly	0.260762	-1.34415	1	6	1	0.00186567	536	10917	39004	Fhos
	GO:0072665	protein localization to vacuole	0.260762	-1.34415	1	6	1	0.00186567	536	10917	41025	p
	GO:0001676	long-chain fatty acid metabolic process	0.260762	-1.34415	1	6	1	0.00186567	536	10917	40056	CG3961
	GO:0072666	establishment of protein localization to vacuole	0.260762	-1.34415	1	6	1	0.00186567	536	10917	41025	p
	GO:0030513	positive regulation of BMP signaling pathway	0.260762	-1.34415	1	6	1	0.00186567	536	10917	35900	babo
	GO:0030540	female genitalia development	0.260762	-1.34415	1	6	1	0.00186567	536	10917	31883	lz
	GO:0006623	protein targeting to vacuole	0.260762	-1.34415	1	6	1	0.00186567	536	10917	41025	p
	GO:0002011	morphogenesis of an epithelial sheet	0.260762	-1.34415	1	6	1	0.00186567	536	10917	39004	Fhos
	GO:0051654	establishment of mitochondrion localization	0.260762	-1.34415	1	6	1	0.00186567	536	10917	35680	didum
	GO:0007486	imaginal disc-derived female genitalia development	0.260762	-1.34415	1	6	1	0.00186567	536	10917	31883	lz
	GO:0051036	regulation of endosome size	0.260762	-1.34415	1	6	1	0.00186567	536	10917	38418	kst
	GO:0042402	cellular biogenic amine catabolic process	0.260762	-1.34415	1	6	1	0.00186567	536	10917	41625	Ace
	GO:0047497	mitochondrion transport along microtubule	0.260762	-1.34415	1	6	1	0.00186567	536	10917	35680	didum
	GO:0015936	coenzyme A metabolic process	0.260762	-1.34415	1	6	1	0.00186567	536	10917	40846	Dpck
	GO:0050732	negative regulation of peptidyl-tyrosine phosphorylation	0.260762	-1.34415	1	6	1	0.00186567	536	10917	38961	Cbl
	GO:0008015	blood circulation	0.260762	-1.34415	1	6	1	0.00186567	536	10917	44849	pnr
	GO:0090136	epithelial cell-cell adhesion	0.260762	-1.34415	1	6	1	0.00186567	536	10917	48973	Src64B
	GO:0034643	establishment of mitochondrion localization, microtubule-mediated	0.260762	-1.34415	1	6	1	0.00186567	536	10917	35680	didum
	GO:0043243	positive regulation of protein complex disassembly	0.260762	-1.34415	1	6	1	0.00186567	536	10917	47091	comt
	GO:0060047	heart contraction	0.260762	-1.34415	1	6	1	0.00186567	536	10917	44849	pnr
	GO:0009310	amine catabolic process	0.260762	-1.34415	1	6	1	0.00186567	536	10917	41625	Ace
	GO:0055069	zinc ion homeostasis	0.260762	-1.34415	1	6	1	0.00186567	536	10917	39089	MTF-1
	GO:0060914	heart formation	0.260762	-1.34415	1	6	1	0.00186567	536	10917	33607	slp1
	GO:0045317	equator specification	0.260762	-1.34415	1	6	1	0.00186567	536	10917	39441	mirr
	GO:0006301	postreplication repair	0.260762	-1.34415	1	6	1	0.00186567	536	10917	40965	DNApol-iota
	GO:0031629	synaptic vesicle fusion to presynaptic membrane	0.260762	-1.34415	1	6	1	0.00186567	536	10917	47091	comt
	GO:0031399	regulation of protein modification process	0.262883	-1.33604	1	142	9	0.016791	536	10917	3.25514e+45	CycD,boss,sgg,babo,Cbl,Dap160,step,Src64B,Krn
	GO:0051726	regulation of cell cycle	0.268264	-1.31578	1	330	19	0.0354478	536	10917	3.59004e+95	babo,Lim3,CG2865,CG15923,CG14684,CycD,sgg,CG32006,Z600,brat,rap,Topors,CG9426,aret,Klc,Gadd45,slp2,tll,slp1
	GO:0007143	female meiotic division	0.269035	-1.31292	1	71	5	0.00932836	536	10917	3.12483e+24	sgg,wisp,Gli,Rab5,Syx13
	GO:0016197	endosomal transport	0.269035	-1.31292	1	71	5	0.00932836	536	10917	3.38454e+24	mtm,g,Rab5,Vps35,kst
	GO:0010623	developmental programmed cell death	0.271239	-1.30475	1	125	8	0.0149254	536	10917	3.82183e+39	drpr,Akap200,rst,Fhos,grim,out,comm3,Eip93F
	GO:0070838	divalent metal ion transport	0.272407	-1.30046	1	37	3	0.00559701	536	10917	346813215840551	spict,cac,CG1090
	GO:0072511	divalent inorganic cation transport	0.272407	-1.30046	1	37	3	0.00559701	536	10917	346813215840551	spict,cac,CG1090
	GO:0006813	potassium ion transport	0.272407	-1.30046	1	37	3	0.00559701	536	10917	314563600537843	SK,CG1688,sei
	GO:0051647	nucleus localization	0.272407	-1.30046	1	37	3	0.00559701	536	10917	321523849138067	wisp,ens,klar
	GO:0007140	male meiosis	0.272975	-1.29838	1	54	4	0.00746269	536	10917	3.78104e+19	thoc5,wuc,Topors,Syx13
	GO:0043254	regulation of protein complex assembly	0.272975	-1.29838	1	54	4	0.00746269	536	10917	3.74714e+19	NC2alpha,Apc,DAAM,Jupiter
	GO:0070983	dendrite guidance	0.275872	-1.28782	1	21	2	0.00373134	536	10917	3971741363	comm,pros
	GO:0042337	cuticle development involved in chitin-based cuticle molting cycle	0.275872	-1.28782	1	21	2	0.00373134	536	10917	3124844642	sgg,Apc
	GO:0035222	wing disc pattern formation	0.278563	-1.27811	1	72	5	0.00932836	536	10917	3.12294e+24	boi,drpr,CG14073,Cad99C,peb
	GO:0007010	cytoskeleton organization	0.279915	-1.27327	1	622	34	0.0634328	536	10917	4.37583e+171	RhoGAP100F,Kap3,Klp68D,Sry-alpha,Khc-73,futsch,Sra-1,sgg,qua,brp,Patronin,tmod,Topors,Ced-12,Src64B,dila,Gbeta13F,DAAM,ena,Ank2,CG3618,CG9121,klar,wisp,mtm,Prosap,gukh,alpha-Spec,Hem,Rcd7,Apc,loco,ssh,ens
	GO:0008595	anterior/posterior axis specification, embryo	0.285514	-1.25347	1	127	8	0.0149254	536	10917	3.56803e+39	didum,sev,tll,csw,dos,slp1,sty,peb
	GO:0007351	tripartite regional subdivision	0.285514	-1.25347	1	127	8	0.0149254	536	10917	3.56803e+39	didum,sev,tll,csw,dos,slp1,sty,peb
	GO:0051222	positive regulation of protein transport	0.285961	-1.2519	1	38	3	0.00559701	536	10917	448564582144317	ru,Abl,CanB
	GO:0048878	chemical homeostasis	0.287683	-1.2459	1	109	7	0.0130597	536	10917	4.31463e+34	boss,Npc2a,Vha100-1,Seipin,MTF-1,Rab14,Mio
	GO:0032446	protein modification by small protein conjugation	0.292165	-1.23044	1	165	10	0.0186567	536	10917	3.75423e+49	ari-2,hiw,CG5087,CG9941,gol,Topors,rdx,Cbl,neur,CG13344
	GO:2000145	regulation of cell motility	0.294386	-1.22286	1	22	2	0.00373134	536	10917	3720139004	ena,Fhos
	GO:0007485	imaginal disc-derived male genitalia development	0.294386	-1.22286	1	22	2	0.00373134	536	10917	3341831364	Rab5,Fas2
	GO:0007632	visual behavior	0.294386	-1.22286	1	22	2	0.00373134	536	10917	4124732158	Syn,cac
	GO:0030334	regulation of cell migration	0.294386	-1.22286	1	22	2	0.00373134	536	10917	3720139004	ena,Fhos
	GO:0007034	vacuolar transport	0.294386	-1.22286	1	22	2	0.00373134	536	10917	4481941025	g,p
	GO:0046824	positive regulation of nucleocytoplasmic transport	0.294386	-1.22286	1	22	2	0.00373134	536	10917	4582144317	Abl,CanB
	GO:0007026	negative regulation of microtubule depolymerization	0.294386	-1.22286	1	22	2	0.00373134	536	10917	3697838231	Patronin,alpha-Spec
	GO:0035050	embryonic heart tube development	0.294386	-1.22286	1	22	2	0.00373134	536	10917	4484938816	pnr,qm
	GO:0046660	female sex differentiation	0.294386	-1.22286	1	22	2	0.00373134	536	10917	3188336897	lz,inaC
	GO:0006814	sodium ion transport	0.295202	-1.2201	1	56	4	0.00746269	536	10917	4.05803e+19	rpk,para,tipE,CG1090
	GO:0006873	cellular ion homeostasis	0.295202	-1.2201	1	56	4	0.00746269	536	10917	4.34423e+19	Vha100-1,Rab14,Seipin,MTF-1
	GO:0046959	habituation	0.297077	-1.21377	1	7	1	0.00186567	536	10917	31248	sgg
	GO:0021675	nerve development	0.297077	-1.21377	1	7	1	0.00186567	536	10917	41363	pros
	GO:0002218	activation of innate immune response	0.297077	-1.21377	1	7	1	0.00186567	536	10917	35997	Mmp2
	GO:0007516	hemocyte development	0.297077	-1.21377	1	7	1	0.00186567	536	10917	34277	gcm
	GO:0048260	positive regulation of receptor-mediated endocytosis	0.297077	-1.21377	1	7	1	0.00186567	536	10917	39717	comm
	GO:0043652	engulfment of apoptotic cell	0.297077	-1.21377	1	7	1	0.00186567	536	10917	38218	drpr
	GO:0035567	non-canonical Wnt signaling pathway	0.297077	-1.21377	1	7	1	0.00186567	536	10917	45821	Abl
	GO:0031440	regulation of mRNA 3'-end processing	0.297077	-1.21377	1	7	1	0.00186567	536	10917	31000	elav
	GO:0035262	gonad morphogenesis	0.297077	-1.21377	1	7	1	0.00186567	536	10917	37201	ena
	GO:0035007	regulation of melanization defense response	0.297077	-1.21377	1	7	1	0.00186567	536	10917	39063	PGRP-LC
	GO:1990267	response to transition metal nanoparticle	0.297077	-1.21377	1	7	1	0.00186567	536	10917	39089	MTF-1
	GO:0034032	purine nucleoside bisphosphate metabolic process	0.297077	-1.21377	1	7	1	0.00186567	536	10917	40846	Dpck
	GO:0035001	dorsal trunk growth, open tracheal system	0.297077	-1.21377	1	7	1	0.00186567	536	10917	35343	vari
	GO:0006509	membrane protein ectodomain proteolysis	0.297077	-1.21377	1	7	1	0.00186567	536	10917	43558	Tace
	GO:1901216	positive regulation of neuron death	0.297077	-1.21377	1	7	1	0.00186567	536	10917	40014	grim
	GO:0033875	ribonucleoside bisphosphate metabolic process	0.297077	-1.21377	1	7	1	0.00186567	536	10917	40846	Dpck
	GO:0042073	intraciliary transport	0.297077	-1.21377	1	7	1	0.00186567	536	10917	36010	dila
	GO:0035193	larval central nervous system remodeling	0.297077	-1.21377	1	7	1	0.00186567	536	10917	40014	grim
	GO:0098581	detection of external biotic stimulus	0.297077	-1.21377	1	7	1	0.00186567	536	10917	39063	PGRP-LC
	GO:0031102	neuron projection regeneration	0.297077	-1.21377	1	7	1	0.00186567	536	10917	40143	wnd
	GO:0097206	nephrocyte filtration	0.297077	-1.21377	1	7	1	0.00186567	536	10917	31292	kirre
	GO:0010579	positive regulation of adenylate cyclase activity involved in G-protein coupled receptor signaling pathway	0.297077	-1.21377	1	7	1	0.00186567	536	10917	3885573	Octbeta3R
	GO:0015914	phospholipid transport	0.297077	-1.21377	1	7	1	0.00186567	536	10917	36488	CG42321
	GO:0033865	nucleoside bisphosphate metabolic process	0.297077	-1.21377	1	7	1	0.00186567	536	10917	40846	Dpck
	GO:2000243	positive regulation of reproductive process	0.297077	-1.21377	1	7	1	0.00186567	536	10917	35680	didum
	GO:0097205	renal filtration	0.297077	-1.21377	1	7	1	0.00186567	536	10917	31292	kirre
	GO:0007386	compartment pattern specification	0.297077	-1.21377	1	7	1	0.00186567	536	10917	37201	ena
	GO:0033119	negative regulation of RNA splicing	0.297077	-1.21377	1	7	1	0.00186567	536	10917	34370	Rsf1
	GO:0006998	nuclear envelope organization	0.297077	-1.21377	1	7	1	0.00186567	536	10917	37188	Topors
	GO:0030968	endoplasmic reticulum unfolded protein response	0.297077	-1.21377	1	7	1	0.00186567	536	10917	42358	Ire1
	GO:0035196	production of miRNAs involved in gene silencing by miRNA	0.297077	-1.21377	1	7	1	0.00186567	536	10917	36544	AGO1
	GO:0000209	protein polyubiquitination	0.299567	-1.20542	1	39	3	0.00559701	536	10917	375423718841085	ari-2,Topors,neur
	GO:0048865	stem cell fate commitment	0.299567	-1.20542	1	39	3	0.00559701	536	10917	351973816841363	brat,rho,pros
	GO:0008258	head involution	0.299567	-1.20542	1	39	3	0.00559701	536	10917	372014464231391	ena,Apc,peb
	GO:0006950	response to stress	0.29984	-1.20451	1	962	51	0.0951493	536	10917	33374,39063,34385,36543,35997,33392,39617,41096,32619,42358,38185,40143,32637,40965,37188,41190,35646,34277,31883,40014,41247,31245,48973,38418,39706,53472,38504,43087,31667,39004,40249,34300,44936,36079,43585,33916,33845,38218,38057,31002,36771,39583,246456,34840,37978,43803,38122,37099,39089,42672,39071	Npc2a,PGRP-LC,Cdk5alpha,DJ-1alpha,Mmp2,aop,DCX-EMAP,ird1,para,Ire1,CG12004,wnd,mthl1,DNApol-iota,Topors,Rpt3R,Gadd45,gcm,lz,grim,Syn,Seipin,Src64B,kst,Eig71Ee,Aplip1,tipE,msi,Dok,Fhos,RhoBTB,IP3K1,Eip93F,CG12913,CG11498,eya,mtm,drpr,mthl10,Appl,SP2353,bbg,CG30098,Rab14,Atf-2,Eph,LysX,IM23,MTF-1,loco,Hsp67Bc
	GO:0071705	nitrogen compound transport	0.302965	-1.19414	1	148	9	0.016791	536	10917	4.29883e+44	CG13646,w,thoc5,sll,Eaat2,DAT,CG3556,CG12531,Ent3
	GO:0060538	skeletal muscle organ development	0.306402	-1.18286	1	57	4	0.00746269	536	10917	3.46334e+19	Ced-12,drl,wech,ens
	GO:0010927	cellular component assembly involved in morphogenesis	0.312233	-1.16401	1	187	11	0.0205224	536	10917	3.17817e+55	CG32006,dila,Cad99C,Kap3,DAAM,CG15923,CG5142,Klc,slp2,slp1,mirr
	GO:0006891	intra-Golgi vesicle-mediated transport	0.31283	-1.16209	1	23	2	0.00373134	536	10917	4183333739	SIDL,qtc
	GO:0031111	negative regulation of microtubule polymerization or depolymerization	0.31283	-1.16209	1	23	2	0.00373134	536	10917	3697838231	Patronin,alpha-Spec
	GO:0043409	negative regulation of MAPK cascade	0.31283	-1.16209	1	23	2	0.00373134	536	10917	3124831391	sgg,peb
	GO:0016081	synaptic vesicle docking involved in exocytosis	0.31283	-1.16209	1	23	2	0.00373134	536	10917	4256739485	CASK,Syx13
	GO:0043405	regulation of MAP kinase activity	0.31283	-1.16209	1	23	2	0.00373134	536	10917	3124835425	sgg,step
	GO:0007179	transforming growth factor beta receptor signaling pathway	0.31283	-1.16209	1	23	2	0.00373134	536	10917	4484935900	pnr,babo
	GO:0035051	cardiocyte differentiation	0.31283	-1.16209	1	23	2	0.00373134	536	10917	4484941491	pnr,svp
	GO:0042990	regulation of transcription factor import into nucleus	0.31283	-1.16209	1	23	2	0.00373134	536	10917	3471944317	CG9426,CanB
	GO:0006963	positive regulation of antibacterial peptide biosynthetic process	0.31283	-1.16209	1	23	2	0.00373134	536	10917	4109639063	ird1,PGRP-LC
	GO:0010004	gastrulation involving germ band extension	0.313205	-1.1609	1	40	3	0.00559701	536	10917	396734582143235	Z600,Abl,T48
	GO:0001703	gastrulation with mouth forming first	0.313205	-1.1609	1	40	3	0.00559701	536	10917	396734582143235	Z600,Abl,T48
	GO:0008105	asymmetric protein localization	0.313205	-1.1609	1	40	3	0.00559701	536	10917	448613254442672	sdt,Gbeta13F,loco
	GO:0071478	cellular response to radiation	0.313205	-1.1609	1	40	3	0.00559701	536	10917	439503689735620	CdsA,inaC,Tsp42Ej
	GO:0035023	regulation of Rho protein signal transduction	0.313205	-1.1609	1	40	3	0.00559701	536	10917	346334020542496	Ced-12,CG42674,RhoGAP93B
	GO:0007623	circadian rhythm	0.314795	-1.15583	1	94	6	0.011194	536	10917	3.12483e+29	sgg,Bx,unc79,na,DAT,so
	GO:0030001	metal ion transport	0.316645	-1.14997	1	150	9	0.016791	536	10917	4.05803e+44	rpk,SK,CG1688,tipE,cac,CG1090,spict,para,sei
	GO:0043069	negative regulation of programmed cell death	0.317266	-1.14801	1	76	5	0.00932836	536	10917	5.74054e+26	futsch,GlcT-1,grim,csw,Apc
	GO:0019730	antimicrobial humoral response	0.317266	-1.14801	1	76	5	0.00932836	536	10917	3.81224e+24	LysX,IM23,dos,PGRP-LC,Eip75B
	GO:0048754	branching morphogenesis of an epithelial tube	0.317645	-1.14682	1	58	4	0.00746269	536	10917	4.52784e+21	csw,CdsA,sty,seq
	GO:0061138	morphogenesis of a branching epithelium	0.317645	-1.14682	1	58	4	0.00746269	536	10917	4.52784e+21	csw,CdsA,sty,seq
	GO:0060446	branching involved in open tracheal system development	0.317645	-1.14682	1	58	4	0.00746269	536	10917	4.52784e+21	csw,CdsA,sty,seq
	GO:0000578	embryonic axis specification	0.321967	-1.13331	1	132	8	0.0149254	536	10917	3.56803e+39	didum,sev,tll,csw,dos,slp1,sty,peb
	GO:0006812	cation transport	0.32204	-1.13308	1	265	15	0.0279851	536	10917	4.05804e+75	rpk,CG42321,CG31030,Vha100-1,SK,CG1688,DAT,tipE,cac,CG1090,VhaM9.7-a,Atpalpha,spict,para,sei
	GO:0006959	humoral immune response	0.323537	-1.12844	1	95	6	0.011194	536	10917	3.97064e+29	Eig71Ee,LysX,IM23,dos,PGRP-LC,Eip75B
	GO:0009894	regulation of catabolic process	0.324307	-1.12606	1	170	10	0.0186567	536	10917	4.18333e+49	SIDL,CG5337,crb,Ced-12,RN-tre,sgg,RhoGAP93B,Hsp67Bc,plx,ltd
	GO:0015991	ATP hydrolysis coupled proton transport	0.326858	-1.11823	1	41	3	0.00559701	536	10917	3185634344238520	CG31030,Vha100-1,VhaM9.7-a
	GO:0015988	energy coupled proton transmembrane transport, against electrochemical gradient	0.326858	-1.11823	1	41	3	0.00559701	536	10917	3185634344238520	CG31030,Vha100-1,VhaM9.7-a
	GO:0030010	establishment of cell polarity	0.326858	-1.11823	1	41	3	0.00559701	536	10917	312484289636718	sgg,crb,Khc-73
	GO:0002831	regulation of response to biotic stimulus	0.328921	-1.11194	1	59	4	0.00746269	536	10917	4.48493e+19	pnr,wisp,ird1,PGRP-LC
	GO:0061525	hindgut development	0.328921	-1.11194	1	59	4	0.00746269	536	10917	3.62584e+19	ths,crb,svp,rho
	GO:0007442	hindgut morphogenesis	0.328921	-1.11194	1	59	4	0.00746269	536	10917	3.62584e+19	ths,crb,svp,rho
	GO:0030258	lipid modification	0.328921	-1.11194	1	59	4	0.00746269	536	10917	2.76889e+21	CG42271,Pi4KIIalpha,Seipin,Ipp
	GO:0043242	negative regulation of protein complex disassembly	0.331168	-1.10513	1	24	2	0.00373134	536	10917	3697838231	Patronin,alpha-Spec
	GO:0034605	cellular response to heat	0.331168	-1.10513	1	24	2	0.00373134	536	10917	3850437978	tipE,Atf-2
	GO:0051489	regulation of filopodium assembly	0.331168	-1.10513	1	24	2	0.00373134	536	10917	3720131075	ena,DAAM
	GO:1901880	negative regulation of protein depolymerization	0.331168	-1.10513	1	24	2	0.00373134	536	10917	3697838231	Patronin,alpha-Spec
	GO:0007097	nuclear migration	0.331168	-1.10513	1	24	2	0.00373134	536	10917	3215238067	wisp,klar
	GO:0033619	membrane protein proteolysis	0.331611	-1.10379	1	8	1	0.00186567	536	10917	43558	Tace
	GO:1902115	regulation of organelle assembly	0.331611	-1.10379	1	8	1	0.00186567	536	10917	31075	DAAM
	GO:0030204	chondroitin sulfate metabolic process	0.331611	-1.10379	1	8	1	0.00186567	536	10917	36079	CG12913
	GO:0050806	positive regulation of synaptic transmission	0.331611	-1.10379	1	8	1	0.00186567	536	10917	38231	alpha-Spec
	GO:0046671	negative regulation of retinal cell programmed cell death	0.331611	-1.10379	1	8	1	0.00186567	536	10917	44642	Apc
	GO:0021551	central nervous system morphogenesis	0.331611	-1.10379	1	8	1	0.00186567	536	10917	43023	dan
	GO:0048935	peripheral nervous system neuron development	0.331611	-1.10379	1	8	1	0.00186567	536	10917	36010	dila
	GO:0046605	regulation of centrosome cycle	0.331611	-1.10379	1	8	1	0.00186567	536	10917	42443	CG15923
	GO:0050650	chondroitin sulfate proteoglycan biosynthetic process	0.331611	-1.10379	1	8	1	0.00186567	536	10917	36079	CG12913
	GO:0007561	imaginal disc eversion	0.331611	-1.10379	1	8	1	0.00186567	536	10917	35997	Mmp2
	GO:0007296	vitellogenesis	0.331611	-1.10379	1	8	1	0.00186567	536	10917	31938	Yp2
	GO:0030206	chondroitin sulfate biosynthetic process	0.331611	-1.10379	1	8	1	0.00186567	536	10917	36079	CG12913
	GO:0006071	glycerol metabolic process	0.331611	-1.10379	1	8	1	0.00186567	536	10917	41997	CG14883
	GO:0000394	RNA splicing, via endonucleolytic cleavage and ligation	0.331611	-1.10379	1	8	1	0.00186567	536	10917	42358	Ire1
	GO:0007319	negative regulation of oskar mRNA translation	0.331611	-1.10379	1	8	1	0.00186567	536	10917	34648	aret
	GO:0032231	regulation of actin filament bundle assembly	0.331611	-1.10379	1	8	1	0.00186567	536	10917	39004	Fhos
	GO:0031445	regulation of heterochromatin assembly	0.331611	-1.10379	1	8	1	0.00186567	536	10917	37978	Atf-2
	GO:0035090	maintenance of apical/basal cell polarity	0.331611	-1.10379	1	8	1	0.00186567	536	10917	42896	crb
	GO:0050654	chondroitin sulfate proteoglycan metabolic process	0.331611	-1.10379	1	8	1	0.00186567	536	10917	36079	CG12913
	GO:0007630	jump response	0.331611	-1.10379	1	8	1	0.00186567	536	10917	48971	Atpalpha
	GO:0007438	oenocyte development	0.331611	-1.10379	1	8	1	0.00186567	536	10917	38168	rho
	GO:0019400	alditol metabolic process	0.331611	-1.10379	1	8	1	0.00186567	536	10917	41997	CG14883
	GO:0050775	positive regulation of dendrite morphogenesis	0.331611	-1.10379	1	8	1	0.00186567	536	10917	40715	kat-60L1
	GO:0060573	cell fate specification involved in pattern specification	0.331611	-1.10379	1	8	1	0.00186567	536	10917	38168	rho
	GO:1902750	negative regulation of cell cycle G2/M phase transition	0.331611	-1.10379	1	8	1	0.00186567	536	10917	39673	Z600
	GO:0042694	muscle cell fate specification	0.331611	-1.10379	1	8	1	0.00186567	536	10917	36295	jeb
	GO:0043506	regulation of JUN kinase activity	0.331611	-1.10379	1	8	1	0.00186567	536	10917	31248	sgg
	GO:0010847	regulation of chromatin assembly	0.331611	-1.10379	1	8	1	0.00186567	536	10917	37978	Atf-2
	GO:0010578	regulation of adenylate cyclase activity involved in G-protein coupled receptor signaling pathway	0.331611	-1.10379	1	8	1	0.00186567	536	10917	3885573	Octbeta3R
	GO:0010972	negative regulation of G2/M transition of mitotic cell cycle	0.331611	-1.10379	1	8	1	0.00186567	536	10917	39673	Z600
	GO:0046673	negative regulation of compound eye retinal cell programmed cell death	0.331611	-1.10379	1	8	1	0.00186567	536	10917	44642	Apc
	GO:0048934	peripheral nervous system neuron differentiation	0.331611	-1.10379	1	8	1	0.00186567	536	10917	36010	dila
	GO:0048511	rhythmic process	0.332313	-1.10168	1	96	6	0.011194	536	10917	3.12483e+29	sgg,Bx,unc79,na,DAT,so
	GO:0042981	regulation of apoptotic process	0.336792	-1.08829	1	134	8	0.0149254	536	10917	3.75164e+41	GlcT-1,aos,rdx,futsch,lz,grim,csw,Eip93F
	GO:0009948	anterior/posterior axis specification	0.336792	-1.08829	1	134	8	0.0149254	536	10917	3.56803e+39	didum,sev,tll,csw,dos,slp1,sty,peb
	GO:0051240	positive regulation of multicellular organismal process	0.340218	-1.07817	1	60	4	0.00746269	536	10917	3.33924e+19	aop,babo,sev,step
	GO:0045475	locomotor rhythm	0.340218	-1.07817	1	60	4	0.00746269	536	10917	3.12483e+19	sgg,Bx,unc79,na
	GO:0055082	cellular chemical homeostasis	0.340218	-1.07817	1	60	4	0.00746269	536	10917	4.34423e+19	Vha100-1,Rab14,Seipin,MTF-1
	GO:0030951	establishment or maintenance of microtubule cytoskeleton polarity	0.340508	-1.07732	1	42	3	0.00559701	536	10917	320714464239332	Kap3,Apc,Klp68D
	GO:0007009	plasma membrane organization	0.349365	-1.05164	1	25	2	0.00373134	536	10917	3823138418	alpha-Spec,kst
	GO:0071559	response to transforming growth factor beta	0.349365	-1.05164	1	25	2	0.00373134	536	10917	4484935900	pnr,babo
	GO:0007426	tracheal outgrowth, open tracheal system	0.349365	-1.05164	1	25	2	0.00373134	536	10917	3842435997	sty,Mmp2
	GO:0030717	karyosome formation	0.349365	-1.05164	1	25	2	0.00373134	536	10917	4454348973	enc,Src64B
	GO:0040018	positive regulation of multicellular organism growth	0.349365	-1.05164	1	25	2	0.00373134	536	10917	3590035425	babo,step
	GO:0031114	regulation of microtubule depolymerization	0.349365	-1.05164	1	25	2	0.00373134	536	10917	3697838231	Patronin,alpha-Spec
	GO:0002786	regulation of antibacterial peptide production	0.349365	-1.05164	1	25	2	0.00373134	536	10917	4109639063	ird1,PGRP-LC
	GO:0007469	antennal development	0.349365	-1.05164	1	25	2	0.00373134	536	10917	3188353579	lz,Dip3
	GO:0001101	response to acid chemical	0.349365	-1.05164	1	25	2	0.00373134	536	10917	3907141625	Hsp67Bc,Ace
	GO:0002808	regulation of antibacterial peptide biosynthetic process	0.349365	-1.05164	1	25	2	0.00373134	536	10917	4109639063	ird1,PGRP-LC
	GO:0071560	cellular response to transforming growth factor beta stimulus	0.349365	-1.05164	1	25	2	0.00373134	536	10917	4484935900	pnr,babo
	GO:0030177	positive regulation of Wnt signaling pathway	0.349365	-1.05164	1	25	2	0.00373134	536	10917	3808236125	ebd1,stan
	GO:0030162	regulation of proteolysis	0.349946	-1.04998	1	98	6	0.011194	536	10917	4.17044e+29	rdx,7B2,sgg,hbs,crb,Eip93F
	GO:0055080	cation homeostasis	0.351528	-1.04547	1	61	4	0.00746269	536	10917	4.34423e+19	Vha100-1,Seipin,MTF-1,Rab14
	GO:0070647	protein modification by small protein conjugation or removal	0.353941	-1.03863	1	213	12	0.0223881	536	10917	3.75423e+59	ari-2,hiw,CG5087,CG9941,gol,Topors,rdx,CG14619,Cbl,CG30421,neur,CG13344
	GO:0044801	single-organism membrane fusion	0.354137	-1.03807	1	43	3	0.00559701	536	10917	470913341839485	comt,Rab5,Syx13
	GO:0016203	muscle attachment	0.354137	-1.03807	1	43	3	0.00559701	536	10917	346334435544653	Ced-12,drl,wech
	GO:0071900	regulation of protein serine/threonine kinase activity	0.354137	-1.03807	1	43	3	0.00559701	536	10917	325513124835425	CycD,sgg,step
	GO:0048512	circadian behavior	0.356573	-1.03122	1	80	5	0.00932836	536	10917	3.12483e+24	sgg,Bx,unc79,na,DAT
	GO:1903317	regulation of protein maturation	0.358793	-1.02501	1	99	6	0.011194	536	10917	4.17044e+29	rdx,7B2,sgg,hbs,crb,Eip93F
	GO:0070613	regulation of protein processing	0.358793	-1.02501	1	99	6	0.011194	536	10917	4.17044e+29	rdx,7B2,sgg,hbs,crb,Eip93F
	GO:0048259	regulation of receptor-mediated endocytosis	0.364451	-1.00936	1	9	1	0.00186567	536	10917	39717	comm
	GO:0009744	response to sucrose	0.364451	-1.00936	1	9	1	0.00186567	536	10917	35402	Mio
	GO:0009651	response to salt stress	0.364451	-1.00936	1	9	1	0.00186567	536	10917	37978	Atf-2
	GO:0060632	regulation of microtubule-based movement	0.364451	-1.00936	1	9	1	0.00186567	536	10917	38491	ens
	GO:0008054	cyclin catabolic process	0.364451	-1.00936	1	9	1	0.00186567	536	10917	45922	rap
	GO:0007343	egg activation	0.364451	-1.00936	1	9	1	0.00186567	536	10917	32152	wisp
	GO:0007271	synaptic transmission, cholinergic	0.364451	-1.00936	1	9	1	0.00186567	536	10917	41625	Ace
	GO:0061320	pericardial nephrocyte differentiation	0.364451	-1.00936	1	9	1	0.00186567	536	10917	44849	pnr
	GO:0007205	protein kinase C-activating G-protein coupled receptor signaling pathway	0.364451	-1.00936	1	9	1	0.00186567	536	10917	5740362	CG34384
	GO:0046839	phospholipid dephosphorylation	0.364451	-1.00936	1	9	1	0.00186567	536	10917	2768892	CG42271
	GO:0009595	detection of biotic stimulus	0.364451	-1.00936	1	9	1	0.00186567	536	10917	39063	PGRP-LC
	GO:0045842	positive regulation of mitotic metaphase/anaphase transition	0.364451	-1.00936	1	9	1	0.00186567	536	10917	31248	sgg
	GO:0008584	male gonad development	0.364451	-1.00936	1	9	1	0.00186567	536	10917	33916	eya
	GO:0002253	activation of immune response	0.364451	-1.00936	1	9	1	0.00186567	536	10917	35997	Mmp2
	GO:0046856	phosphatidylinositol dephosphorylation	0.364451	-1.00936	1	9	1	0.00186567	536	10917	2768892	CG42271
	GO:1903052	positive regulation of proteolysis involved in cellular protein catabolic process	0.364451	-1.00936	1	9	1	0.00186567	536	10917	31248	sgg
	GO:0034334	adherens junction maintenance	0.364451	-1.00936	1	9	1	0.00186567	536	10917	41398	Csk
	GO:0045840	positive regulation of mitosis	0.364451	-1.00936	1	9	1	0.00186567	536	10917	31248	sgg
	GO:0046845	branched duct epithelial cell fate determination, open tracheal system	0.364451	-1.00936	1	9	1	0.00186567	536	10917	38168	rho
	GO:0032856	activation of Ras GTPase activity	0.364451	-1.00936	1	9	1	0.00186567	536	10917	34633	Ced-12
	GO:0046670	positive regulation of retinal cell programmed cell death	0.364451	-1.00936	1	9	1	0.00186567	536	10917	31883	lz
	GO:0045785	positive regulation of cell adhesion	0.364451	-1.00936	1	9	1	0.00186567	536	10917	39004	Fhos
	GO:0032436	positive regulation of proteasomal ubiquitin-dependent protein catabolic process	0.364451	-1.00936	1	9	1	0.00186567	536	10917	31248	sgg
	GO:0048580	regulation of post-embryonic development	0.364451	-1.00936	1	9	1	0.00186567	536	10917	39999	Eip75B
	GO:1901800	positive regulation of proteasomal protein catabolic process	0.364451	-1.00936	1	9	1	0.00186567	536	10917	31248	sgg
	GO:0046546	development of primary male sexual characteristics	0.364451	-1.00936	1	9	1	0.00186567	536	10917	33916	eya
	GO:0043153	entrainment of circadian clock by photoperiod	0.364451	-1.00936	1	9	1	0.00186567	536	10917	42210	gl
	GO:0030422	production of siRNA involved in RNA interference	0.364451	-1.00936	1	9	1	0.00186567	536	10917	36544	AGO1
	GO:0043112	receptor metabolic process	0.364451	-1.00936	1	9	1	0.00186567	536	10917	39717	comm
	GO:0043647	inositol phosphate metabolic process	0.364451	-1.00936	1	9	1	0.00186567	536	10917	41701	Ipp
	GO:0001742	oenocyte differentiation	0.364451	-1.00936	1	9	1	0.00186567	536	10917	38168	rho
	GO:1902101	positive regulation of metaphase/anaphase transition of cell cycle	0.364451	-1.00936	1	9	1	0.00186567	536	10917	31248	sgg
	GO:0046672	positive regulation of compound eye retinal cell programmed cell death	0.364451	-1.00936	1	9	1	0.00186567	536	10917	31883	lz
	GO:0006013	mannose metabolic process	0.364451	-1.00936	1	9	1	0.00186567	536	10917	41913	alpha-Man-IIb
	GO:0016204	determination of muscle attachment site	0.364451	-1.00936	1	9	1	0.00186567	536	10917	44355	drl
	GO:0007629	flight behavior	0.367391	-1.00133	1	26	2	0.00373134	536	10917	3171846015	Tbh,tutl
	GO:0001578	microtubule bundle formation	0.367391	-1.00133	1	26	2	0.00373134	536	10917	3601032071	dila,Kap3
	GO:0035285	appendage segmentation	0.367391	-1.00133	1	26	2	0.00373134	536	10917	3341832846	Rab5,Bx
	GO:0036011	imaginal disc-derived leg segmentation	0.367391	-1.00133	1	26	2	0.00373134	536	10917	3341832846	Rab5,Bx
	GO:0030048	actin filament-based movement	0.367391	-1.00133	1	26	2	0.00373134	536	10917	3263735680	mthl1,didum
	GO:0043065	positive regulation of apoptotic process	0.367391	-1.00133	1	26	2	0.00373134	536	10917	4170439833	rdx,aos
	GO:0016441	posttranscriptional gene silencing	0.367731	-1.0004	1	44	3	0.00559701	536	10917	365443862033509	AGO1,blanks,CG17265
	GO:0035194	posttranscriptional gene silencing by RNA	0.367731	-1.0004	1	44	3	0.00559701	536	10917	365443862033509	AGO1,blanks,CG17265
	GO:0007088	regulation of mitosis	0.374144	-0.983116	1	63	4	0.00746269	536	10917	3.96733e+19	Z600,sgg,rap,aret
	GO:0043086	negative regulation of catalytic activity	0.374144	-0.983116	1	63	4	0.00746269	536	10917	3.12484e+19	sgg,Cbl,GABA-B-R1,GABA-B-R2
	GO:0007622	rhythmic behavior	0.376316	-0.977327	1	82	5	0.00932836	536	10917	3.12483e+24	sgg,Bx,unc79,na,DAT
	GO:0009101	glycoprotein biosynthetic process	0.376316	-0.977327	1	82	5	0.00932836	536	10917	3.60796e+26	CG12913,CG34452,sll,FucTA,sff
	GO:0043408	regulation of MAPK cascade	0.376525	-0.976771	1	101	6	0.011194	536	10917	4.17043e+29	rdx,sgg,Aplip1,step,peb,jeb
	GO:0002683	negative regulation of immune system process	0.381274	-0.964237	1	45	3	0.00559701	536	10917	342773677134280	gcm,SP2353,gcm2
	GO:0030952	establishment or maintenance of cytoskeleton polarity	0.381274	-0.964237	1	45	3	0.00559701	536	10917	320714464239332	Kap3,Apc,Klp68D
	GO:0061025	membrane fusion	0.381274	-0.964237	1	45	3	0.00559701	536	10917	470913341839485	comt,Rab5,Syx13
	GO:0007443	Malpighian tubule morphogenesis	0.381274	-0.964237	1	45	3	0.00559701	536	10917	428964149138168	crb,svp,rho
	GO:0061333	renal tubule morphogenesis	0.381274	-0.964237	1	45	3	0.00559701	536	10917	428964149138168	crb,svp,rho
	GO:0007017	microtubule-based process	0.381694	-0.963137	1	513	27	0.0503731	536	10917	3.60104e+137	dila,didum,Aplip1,Kap3,Klp68D,unc-104,CG14763,Khc-73,futsch,Ank2,sgg,DCX-EMAP,kat-60L1,syd,tau,Unc-76,klar,wisp,Patronin,Topors,CG14535,Klc,betaTub60D,CG9279,Apc,Rcd7,ens
	GO:1902875	regulation of embryonic pattern specification	0.385219	-0.953944	1	27	2	0.00373134	536	10917	4454335680	enc,didum
	GO:0071456	cellular response to hypoxia	0.385219	-0.953944	1	27	2	0.00373134	536	10917	4308744936	msi,Eip93F
	GO:0007317	regulation of pole plasm oskar mRNA localization	0.385219	-0.953944	1	27	2	0.00373134	536	10917	4454335680	enc,didum
	GO:0060281	regulation of oocyte development	0.385219	-0.953944	1	27	2	0.00373134	536	10917	4454335680	enc,didum
	GO:1901879	regulation of protein depolymerization	0.385219	-0.953944	1	27	2	0.00373134	536	10917	3697838231	Patronin,alpha-Spec
	GO:0016322	neuron remodeling	0.385219	-0.953944	1	27	2	0.00373134	536	10917	3821840715	drpr,kat-60L1
	GO:0035070	salivary gland histolysis	0.386186	-0.951435	1	83	5	0.00932836	536	10917	3.82184e+24	drpr,Fhos,Akap200,comm3,Eip93F
	GO:0048190	wing disc dorsal/ventral pattern formation	0.394752	-0.929497	1	46	3	0.00559701	536	10917	382184004631391	drpr,CG14073,peb
	GO:0035212	cell competition in a multicellular organism	0.395681	-0.927147	1	10	1	0.00186567	536	10917	38218	drpr
	GO:0031145	anaphase-promoting complex-dependent proteasomal ubiquitin-dependent protein catabolic process	0.395681	-0.927147	1	10	1	0.00186567	536	10917	45922	rap
	GO:0034620	cellular response to unfolded protein	0.395681	-0.927147	1	10	1	0.00186567	536	10917	42358	Ire1
	GO:0045981	positive regulation of nucleotide metabolic process	0.395681	-0.927147	1	10	1	0.00186567	536	10917	3885573	Octbeta3R
	GO:0060361	flight	0.395681	-0.927147	1	10	1	0.00186567	536	10917	38067	klar
	GO:0038202	TORC1 signaling	0.395681	-0.927147	1	10	1	0.00186567	536	10917	32760	Socs16D
	GO:0030801	positive regulation of cyclic nucleotide metabolic process	0.395681	-0.927147	1	10	1	0.00186567	536	10917	3885573	Octbeta3R
	GO:0009648	photoperiodism	0.395681	-0.927147	1	10	1	0.00186567	536	10917	42210	gl
	GO:0030723	ovarian fusome organization	0.395681	-0.927147	1	10	1	0.00186567	536	10917	48973	Src64B
	GO:0050817	coagulation	0.395681	-0.927147	1	10	1	0.00186567	536	10917	39706	Eig71Ee
	GO:0018990	ecdysis, chitin-based cuticle	0.395681	-0.927147	1	10	1	0.00186567	536	10917	39999	Eip75B
	GO:0045762	positive regulation of adenylate cyclase activity	0.395681	-0.927147	1	10	1	0.00186567	536	10917	3885573	Octbeta3R
	GO:0071711	basement membrane organization	0.395681	-0.927147	1	10	1	0.00186567	536	10917	35997	Mmp2
	GO:0000187	activation of MAPK activity	0.395681	-0.927147	1	10	1	0.00186567	536	10917	35425	step
	GO:0008343	adult feeding behavior	0.395681	-0.927147	1	10	1	0.00186567	536	10917	35832	mtt
	GO:0001775	cell activation	0.395681	-0.927147	1	10	1	0.00186567	536	10917	32152	wisp
	GO:1900544	positive regulation of purine nucleotide metabolic process	0.395681	-0.927147	1	10	1	0.00186567	536	10917	3885573	Octbeta3R
	GO:0046958	nonassociative learning	0.395681	-0.927147	1	10	1	0.00186567	536	10917	31248	sgg
	GO:0042147	retrograde transport, endosome to Golgi	0.395681	-0.927147	1	10	1	0.00186567	536	10917	37536	Vps35
	GO:0043407	negative regulation of MAP kinase activity	0.395681	-0.927147	1	10	1	0.00186567	536	10917	31248	sgg
	GO:0071554	cell wall organization or biogenesis	0.395681	-0.927147	1	10	1	0.00186567	536	10917	38122	LysX
	GO:0030810	positive regulation of nucleotide biosynthetic process	0.395681	-0.927147	1	10	1	0.00186567	536	10917	3885573	Octbeta3R
	GO:0007599	hemostasis	0.395681	-0.927147	1	10	1	0.00186567	536	10917	39706	Eig71Ee
	GO:0030708	germarium-derived female germ-line cyst encapsulation	0.395681	-0.927147	1	10	1	0.00186567	536	10917	48973	Src64B
	GO:0046667	compound eye retinal cell programmed cell death	0.395681	-0.927147	1	10	1	0.00186567	536	10917	31290	rst
	GO:0016998	cell wall macromolecule catabolic process	0.395681	-0.927147	1	10	1	0.00186567	536	10917	38122	LysX
	GO:0030816	positive regulation of cAMP metabolic process	0.395681	-0.927147	1	10	1	0.00186567	536	10917	3885573	Octbeta3R
	GO:0046847	filopodium assembly	0.395681	-0.927147	1	10	1	0.00186567	536	10917	36876	unc-104
	GO:0044036	cell wall macromolecule metabolic process	0.395681	-0.927147	1	10	1	0.00186567	536	10917	38122	LysX
	GO:0030819	positive regulation of cAMP biosynthetic process	0.395681	-0.927147	1	10	1	0.00186567	536	10917	3885573	Octbeta3R
	GO:0042381	hemolymph coagulation	0.395681	-0.927147	1	10	1	0.00186567	536	10917	39706	Eig71Ee
	GO:1900373	positive regulation of purine nucleotide biosynthetic process	0.395681	-0.927147	1	10	1	0.00186567	536	10917	3885573	Octbeta3R
	GO:0006182	cGMP biosynthetic process	0.395681	-0.927147	1	10	1	0.00186567	536	10917	34553	Gyc32E
	GO:0051785	positive regulation of nuclear division	0.395681	-0.927147	1	10	1	0.00186567	536	10917	31248	sgg
	GO:0030804	positive regulation of cyclic nucleotide biosynthetic process	0.395681	-0.927147	1	10	1	0.00186567	536	10917	3885573	Octbeta3R
	GO:0006109	regulation of carbohydrate metabolic process	0.395681	-0.927147	1	10	1	0.00186567	536	10917	38961	Cbl
	GO:0035153	epithelial cell type specification, open tracheal system	0.395681	-0.927147	1	10	1	0.00186567	536	10917	3772396	seq
	GO:0009100	glycoprotein metabolic process	0.396049	-0.926218	1	84	5	0.00932836	536	10917	3.60796e+26	CG12913,CG34452,sll,FucTA,sff
	GO:0061326	renal tubule development	0.396693	-0.924592	1	65	4	0.00746269	536	10917	4.41294e+19	hbs,crb,svp,rho
	GO:0072002	Malpighian tubule development	0.396693	-0.924592	1	65	4	0.00746269	536	10917	4.41294e+19	hbs,crb,svp,rho
	GO:0007126	meiotic nuclear division	0.40071	-0.914517	1	162	9	0.016791	536	10917	4.22133e+44	cona,wisp,Gli,thoc5,wuc,Topors,sgg,Rab5,Syx13
	GO:0070887	cellular response to chemical stimulus	0.402171	-0.910877	1	221	12	0.0223881	536	10917	3.59004e+59	babo,AGO1,Eip75B,dock,svp,msi,ths,pnr,tll,csw,Ire1,Eip93F
	GO:0032320	positive regulation of Ras GTPase activity	0.402824	-0.909255	1	28	2	0.00373134	536	10917	3463342496	Ced-12,RhoGAP93B
	GO:0051259	protein oligomerization	0.402824	-0.909255	1	28	2	0.00373134	536	10917	4709141085	comt,neur
	GO:0072507	divalent inorganic cation homeostasis	0.402824	-0.909255	1	28	2	0.00373134	536	10917	3124539089	Seipin,MTF-1
	GO:0009408	response to heat	0.405897	-0.901656	1	85	5	0.00932836	536	10917	4.12474e+24	Syn,tipE,Atf-2,loco,Hsp67Bc
	GO:0042303	molting cycle	0.407922	-0.89668	1	66	4	0.00746269	536	10917	3.97063e+19	Eig71Ee,sgg,Apc,Eip75B
	GO:0007591	molting cycle, chitin-based cuticle	0.407922	-0.89668	1	66	4	0.00746269	536	10917	3.97063e+19	Eig71Ee,sgg,Apc,Eip75B
	GO:0010876	lipid localization	0.408152	-0.896115	1	47	3	0.00559701	536	10917	333743648838067	Npc2a,CG42321,klar
	GO:0043066	negative regulation of apoptotic process	0.419108	-0.869627	1	67	4	0.00746269	536	10917	5.74054e+21	futsch,GlcT-1,grim,csw
	GO:0002168	instar larval development	0.419108	-0.869627	1	67	4	0.00746269	536	10917	3.12484e+19	sgg,alpha-Spec,Apc,rho
	GO:0008544	epidermis development	0.419108	-0.869627	1	67	4	0.00746269	536	10917	3.87553e+19	tow,Gli,qua,fw
	GO:0043588	skin development	0.419108	-0.869627	1	67	4	0.00746269	536	10917	3.87553e+19	tow,Gli,qua,fw
	GO:0051783	regulation of nuclear division	0.419108	-0.869627	1	67	4	0.00746269	536	10917	3.96733e+19	Z600,sgg,rap,aret
	GO:0006904	vesicle docking involved in exocytosis	0.420186	-0.867057	1	29	2	0.00373134	536	10917	4256739485	CASK,Syx13
	GO:0042176	regulation of protein catabolic process	0.420186	-0.867057	1	29	2	0.00373134	536	10917	3124842896	sgg,crb
	GO:0048278	vesicle docking	0.420186	-0.867057	1	29	2	0.00373134	536	10917	4256739485	CASK,Syx13
	GO:0022406	membrane docking	0.420186	-0.867057	1	29	2	0.00373134	536	10917	4256739485	CASK,Syx13
	GO:0036294	cellular response to decreased oxygen levels	0.420186	-0.867057	1	29	2	0.00373134	536	10917	4308744936	msi,Eip93F
	GO:0042551	neuron maturation	0.420186	-0.867057	1	29	2	0.00373134	536	10917	3821840715	drpr,kat-60L1
	GO:0071453	cellular response to oxygen levels	0.420186	-0.867057	1	29	2	0.00373134	536	10917	4308744936	msi,Eip93F
	GO:0090316	positive regulation of intracellular protein transport	0.420186	-0.867057	1	29	2	0.00373134	536	10917	4582144317	Abl,CanB
	GO:0031281	positive regulation of cyclase activity	0.425379	-0.854775	1	11	1	0.00186567	536	10917	3885573	Octbeta3R
	GO:0030509	BMP signaling pathway	0.425379	-0.854775	1	11	1	0.00186567	536	10917	32429	hiw
	GO:0016080	synaptic vesicle targeting	0.425379	-0.854775	1	11	1	0.00186567	536	10917	42567	CASK
	GO:0007060	male meiosis chromosome segregation	0.425379	-0.854775	1	11	1	0.00186567	536	10917	37188	Topors
	GO:0000301	retrograde transport, vesicle recycling within Golgi	0.425379	-0.854775	1	11	1	0.00186567	536	10917	33739	qtc
	GO:0070050	neuron cellular homeostasis	0.425379	-0.854775	1	11	1	0.00186567	536	10917	38863	Ank2
	GO:0048138	germ-line cyst encapsulation	0.425379	-0.854775	1	11	1	0.00186567	536	10917	48973	Src64B
	GO:0030859	polarized epithelial cell differentiation	0.425379	-0.854775	1	11	1	0.00186567	536	10917	42896	crb
	GO:0002027	regulation of heart rate	0.425379	-0.854775	1	11	1	0.00186567	536	10917	32158	cac
	GO:0048139	female germ-line cyst encapsulation	0.425379	-0.854775	1	11	1	0.00186567	536	10917	48973	Src64B
	GO:0015918	sterol transport	0.425379	-0.854775	1	11	1	0.00186567	536	10917	33374	Npc2a
	GO:0050714	positive regulation of protein secretion	0.425379	-0.854775	1	11	1	0.00186567	536	10917	44856	ru
	GO:0030308	negative regulation of cell growth	0.425379	-0.854775	1	11	1	0.00186567	536	10917	3772396	seq
	GO:0007282	cystoblast division	0.425379	-0.854775	1	11	1	0.00186567	536	10917	44543	enc
	GO:0014013	regulation of gliogenesis	0.425379	-0.854775	1	11	1	0.00186567	536	10917	34277	gcm
	GO:0042559	pteridine-containing compound biosynthetic process	0.425379	-0.854775	1	11	1	0.00186567	536	10917	43499	Pcd
	GO:0017015	regulation of transforming growth factor beta receptor signaling pathway	0.425379	-0.854775	1	11	1	0.00186567	536	10917	53437	Sulf1
	GO:0043455	regulation of secondary metabolic process	0.425379	-0.854775	1	11	1	0.00186567	536	10917	39063	PGRP-LC
	GO:0031427	response to methotrexate	0.425379	-0.854775	1	11	1	0.00186567	536	10917	39071	Hsp67Bc
	GO:0006964	positive regulation of biosynthetic process of antibacterial peptides active against Gram-negative bacteria	0.425379	-0.854775	1	11	1	0.00186567	536	10917	39063	PGRP-LC
	GO:0000042	protein targeting to Golgi	0.425379	-0.854775	1	11	1	0.00186567	536	10917	33739	qtc
	GO:0045198	establishment of epithelial cell apical/basal polarity	0.425379	-0.854775	1	11	1	0.00186567	536	10917	42896	crb
	GO:0072600	establishment of protein localization to Golgi	0.425379	-0.854775	1	11	1	0.00186567	536	10917	33739	qtc
	GO:0006986	response to unfolded protein	0.425379	-0.854775	1	11	1	0.00186567	536	10917	42358	Ire1
	GO:0001672	regulation of chromatin assembly or disassembly	0.425379	-0.854775	1	11	1	0.00186567	536	10917	37978	Atf-2
	GO:0034285	response to disaccharide	0.425379	-0.854775	1	11	1	0.00186567	536	10917	35402	Mio
	GO:0090100	positive regulation of transmembrane receptor protein serine/threonine kinase signaling pathway	0.425379	-0.854775	1	11	1	0.00186567	536	10917	35900	babo
	GO:0060251	regulation of glial cell proliferation	0.425379	-0.854775	1	11	1	0.00186567	536	10917	34277	gcm
	GO:0034067	protein localization to Golgi apparatus	0.425379	-0.854775	1	11	1	0.00186567	536	10917	33739	qtc
	GO:0071901	negative regulation of protein serine/threonine kinase activity	0.425379	-0.854775	1	11	1	0.00186567	536	10917	31248	sgg
	GO:1901698	response to nitrogen compound	0.425526	-0.854429	1	87	5	0.00932836	536	10917	3.65443e+24	AGO1,Bx,dock,Hsp67Bc,Ace
	GO:0008340	determination of adult lifespan	0.434603	-0.833322	1	147	8	0.0149254	536	10917	3.64033e+39	CG42663,mthl1,mthl10,grim,g,kermit,Cdk5alpha,Atpalpha
	GO:0031047	gene silencing by RNA	0.434668	-0.833172	1	49	3	0.00559701	536	10917	365443862033509	AGO1,blanks,CG17265
	GO:0007178	transmembrane receptor protein serine/threonine kinase signaling pathway	0.434668	-0.833172	1	49	3	0.00559701	536	10917	448493590032429	pnr,babo,hiw
	GO:0002807	positive regulation of antimicrobial peptide biosynthetic process	0.437287	-0.827166	1	30	2	0.00373134	536	10917	4109639063	ird1,PGRP-LC
	GO:1900424	regulation of defense response to bacterium	0.437287	-0.827166	1	30	2	0.00373134	536	10917	4109639063	ird1,PGRP-LC
	GO:0034250	positive regulation of cellular amide metabolic process	0.437287	-0.827166	1	30	2	0.00373134	536	10917	4109639063	ird1,PGRP-LC
	GO:1901654	response to ketone	0.437287	-0.827166	1	30	2	0.00373134	536	10917	3999944936	Eip75B,Eip93F
	GO:0019731	antibacterial humoral response	0.437287	-0.827166	1	30	2	0.00373134	536	10917	3709939063	IM23,PGRP-LC
	GO:0036314	response to sterol	0.437287	-0.827166	1	30	2	0.00373134	536	10917	3999944936	Eip75B,Eip93F
	GO:0035075	response to ecdysone	0.437287	-0.827166	1	30	2	0.00373134	536	10917	3999944936	Eip75B,Eip93F
	GO:0048546	digestive tract morphogenesis	0.441324	-0.817977	1	69	4	0.00746269	536	10917	3.62584e+19	ths,crb,svp,rho
	GO:0006629	lipid metabolic process	0.444282	-0.811297	1	368	19	0.0354478	536	10917	2.76889e+96	CG42271,Npc2a,CG10253,CG14883,CdsA,Pi4KIIalpha,CG10082,qm,dob,Yp2,Ipp,Lip4,CG9509,CG3961,CG3812,CG12398,Eo,Seipin,PIP5K59B
	GO:0048619	embryonic hindgut morphogenesis	0.447762	-0.803494	1	50	3	0.00559701	536	10917	428964149138168	crb,svp,rho
	GO:0007291	sperm individualization	0.447762	-0.803494	1	50	3	0.00559701	536	10917	356803862049701	didum,blanks,gish
	GO:0043484	regulation of RNA splicing	0.452338	-0.793325	1	70	4	0.00746269	536	10917	3.46484e+19	aret,Rox8,Rsf1,Ire1
	GO:0003014	renal system process	0.45362	-0.790496	1	12	1	0.00186567	536	10917	31292	kirre
	GO:0035330	regulation of hippo signaling	0.45362	-0.790496	1	12	1	0.00186567	536	10917	42896	crb
	GO:0006024	glycosaminoglycan biosynthetic process	0.45362	-0.790496	1	12	1	0.00186567	536	10917	36079	CG12913
	GO:1900077	negative regulation of cellular response to insulin stimulus	0.45362	-0.790496	1	12	1	0.00186567	536	10917	33262	dock
	GO:0035234	ectopic germ cell programmed cell death	0.45362	-0.790496	1	12	1	0.00186567	536	10917	32926	out
	GO:0007110	meiosis I cytokinesis	0.45362	-0.790496	1	12	1	0.00186567	536	10917	39485	Syx13
	GO:0070918	production of small RNA involved in gene silencing by RNA	0.45362	-0.790496	1	12	1	0.00186567	536	10917	36544	AGO1
	GO:0007259	JAK-STAT cascade	0.45362	-0.790496	1	12	1	0.00186567	536	10917	32551	CycD
	GO:0006662	glycerol ether metabolic process	0.45362	-0.790496	1	12	1	0.00186567	536	10917	36669	CG10253
	GO:0007189	adenylate cyclase-activating G-protein coupled receptor signaling pathway	0.45362	-0.790496	1	12	1	0.00186567	536	10917	3885573	Octbeta3R
	GO:0045880	positive regulation of smoothened signaling pathway	0.45362	-0.790496	1	12	1	0.00186567	536	10917	53437	Sulf1
	GO:0071359	cellular response to dsRNA	0.45362	-0.790496	1	12	1	0.00186567	536	10917	36544	AGO1
	GO:0007200	phospholipase C-activating G-protein coupled receptor signaling pathway	0.45362	-0.790496	1	12	1	0.00186567	536	10917	35832	mtt
	GO:0006903	vesicle targeting	0.45362	-0.790496	1	12	1	0.00186567	536	10917	42567	CASK
	GO:0032456	endocytic recycling	0.45362	-0.790496	1	12	1	0.00186567	536	10917	33845	mtm
	GO:0008299	isoprenoid biosynthetic process	0.45362	-0.790496	1	12	1	0.00186567	536	10917	38816	qm
	GO:0043331	response to dsRNA	0.45362	-0.790496	1	12	1	0.00186567	536	10917	36544	AGO1
	GO:0007040	lysosome organization	0.45362	-0.790496	1	12	1	0.00186567	536	10917	44819	g
	GO:0022609	multicellular organism adhesion to substrate	0.45362	-0.790496	1	12	1	0.00186567	536	10917	39706	Eig71Ee
	GO:0007594	puparial adhesion	0.45362	-0.790496	1	12	1	0.00186567	536	10917	39706	Eig71Ee
	GO:0034453	microtubule anchoring	0.45362	-0.790496	1	12	1	0.00186567	536	10917	38067	klar
	GO:0035967	cellular response to topologically incorrect protein	0.45362	-0.790496	1	12	1	0.00186567	536	10917	42358	Ire1
	GO:0008205	ecdysone metabolic process	0.45362	-0.790496	1	12	1	0.00186567	536	10917	32423	Eo
	GO:0046627	negative regulation of insulin receptor signaling pathway	0.45362	-0.790496	1	12	1	0.00186567	536	10917	33262	dock
	GO:0046666	retinal cell programmed cell death	0.45362	-0.790496	1	12	1	0.00186567	536	10917	31290	rst
	GO:0031050	dsRNA fragmentation	0.45362	-0.790496	1	12	1	0.00186567	536	10917	36544	AGO1
	GO:0051349	positive regulation of lyase activity	0.45362	-0.790496	1	12	1	0.00186567	536	10917	3885573	Octbeta3R
	GO:0048100	wing disc anterior/posterior pattern formation	0.45362	-0.790496	1	12	1	0.00186567	536	10917	43528	Cad99C
	GO:0007394	dorsal closure, elongation of leading edge cells	0.45362	-0.790496	1	12	1	0.00186567	536	10917	31667	Dok
	GO:0022608	multicellular organism adhesion	0.45362	-0.790496	1	12	1	0.00186567	536	10917	39706	Eig71Ee
	GO:0018904	ether metabolic process	0.45362	-0.790496	1	12	1	0.00186567	536	10917	36669	CG10253
	GO:0048867	stem cell fate determination	0.454109	-0.789417	1	31	2	0.00373134	536	10917	3519741363	brat,pros
	GO:0098662	inorganic cation transmembrane transport	0.454722	-0.788068	1	90	5	0.00932836	536	10917	3.18563e+25	CG31030,Vha100-1,CG1688,cac,VhaM9.7-a
	GO:0098655	cation transmembrane transport	0.454722	-0.788068	1	90	5	0.00932836	536	10917	3.18563e+25	CG31030,Vha100-1,CG1688,cac,VhaM9.7-a
	GO:0043900	regulation of multi-organism process	0.456768	-0.783579	1	130	7	0.0130597	536	10917	3.56464e+34	Gadd45,pnr,wisp,enc,didum,ird1,PGRP-LC
	GO:0010259	multicellular organismal aging	0.457126	-0.782795	1	150	8	0.0149254	536	10917	3.64033e+39	CG42663,mthl1,mthl10,grim,g,kermit,Cdk5alpha,Atpalpha
	GO:0000281	mitotic cytokinesis	0.460732	-0.774939	1	51	3	0.00559701	536	10917	381683948538418	rho,Syx13,kst
	GO:0050801	ion homeostasis	0.463282	-0.76942	1	71	4	0.00746269	536	10917	4.34423e+19	Vha100-1,Seipin,MTF-1,Rab14
	GO:0044092	negative regulation of molecular function	0.463282	-0.76942	1	71	4	0.00746269	536	10917	3.12484e+19	sgg,Cbl,GABA-B-R1,GABA-B-R2
	GO:0034220	ion transmembrane transport	0.464794	-0.766161	1	131	7	0.0130597	536	10917	3.29863e+35	CG12531,CG31030,CG13646,Vha100-1,CG1688,cac,VhaM9.7-a
	GO:0014017	neuroblast fate commitment	0.47064	-0.753662	1	32	2	0.00373134	536	10917	3519741363	brat,pros
	GO:0031124	mRNA 3'-end processing	0.47064	-0.753662	1	32	2	0.00373134	536	10917	3215234648	wisp,aret
	GO:0043547	positive regulation of GTPase activity	0.47064	-0.753662	1	32	2	0.00373134	536	10917	3463342496	Ced-12,RhoGAP93B
	GO:0051258	protein polymerization	0.47064	-0.753662	1	32	2	0.00373134	536	10917	3788838491	betaTub60D,ens
	GO:0001666	response to hypoxia	0.473569	-0.747457	1	52	3	0.00559701	536	10917	326194308744936	para,msi,Eip93F
	GO:0048584	positive regulation of response to stimulus	0.476132	-0.74206	1	314	16	0.0298507	536	10917	3.80824e+80	ebd1,stan,babo,CG42674,MESK2,Tsp86D,step,jeb,Mmp2,rdx,Sulf1,hbs,CG9098,rho,neur,Krn
	GO:0007568	aging	0.479482	-0.735049	1	153	8	0.0149254	536	10917	3.64033e+39	CG42663,mthl1,mthl10,grim,g,kermit,Cdk5alpha,Atpalpha
	GO:0046068	cGMP metabolic process	0.480475	-0.732979	1	13	1	0.00186567	536	10917	34553	Gyc32E
	GO:0042220	response to cocaine	0.480475	-0.732979	1	13	1	0.00186567	536	10917	32846	Bx
	GO:0071804	cellular potassium ion transport	0.480475	-0.732979	1	13	1	0.00186567	536	10917	36005	CG1688
	GO:0035089	establishment of apical/basal cell polarity	0.480475	-0.732979	1	13	1	0.00186567	536	10917	42896	crb
	GO:0030201	heparan sulfate proteoglycan metabolic process	0.480475	-0.732979	1	13	1	0.00186567	536	10917	42115	sll
	GO:0045930	negative regulation of mitotic cell cycle	0.480475	-0.732979	1	13	1	0.00186567	536	10917	39673	Z600
	GO:0015012	heparan sulfate proteoglycan biosynthetic process	0.480475	-0.732979	1	13	1	0.00186567	536	10917	42115	sll
	GO:0007080	mitotic metaphase plate congression	0.480475	-0.732979	1	13	1	0.00186567	536	10917	318874	Nnf1b
	GO:0070588	calcium ion transmembrane transport	0.480475	-0.732979	1	13	1	0.00186567	536	10917	32158	cac
	GO:0007436	larval salivary gland morphogenesis	0.480475	-0.732979	1	13	1	0.00186567	536	10917	38168	rho
	GO:0060359	response to ammonium ion	0.480475	-0.732979	1	13	1	0.00186567	536	10917	32846	Bx
	GO:0006892	post-Golgi vesicle-mediated transport	0.480475	-0.732979	1	13	1	0.00186567	536	10917	44819	g
	GO:0071805	potassium ion transmembrane transport	0.480475	-0.732979	1	13	1	0.00186567	536	10917	36005	CG1688
	GO:0002813	regulation of biosynthetic process of antibacterial peptides active against Gram-negative bacteria	0.480475	-0.732979	1	13	1	0.00186567	536	10917	39063	PGRP-LC
	GO:0035966	response to topologically incorrect protein	0.480475	-0.732979	1	13	1	0.00186567	536	10917	42358	Ire1
	GO:0043406	positive regulation of MAP kinase activity	0.480475	-0.732979	1	13	1	0.00186567	536	10917	35425	step
	GO:0006641	triglyceride metabolic process	0.480475	-0.732979	1	13	1	0.00186567	536	10917	32436	dob
	GO:0007288	sperm axoneme assembly	0.480475	-0.732979	1	13	1	0.00186567	536	10917	32071	Kap3
	GO:0007527	adult somatic muscle development	0.480475	-0.732979	1	13	1	0.00186567	536	10917	38082	ebd1
	GO:0045196	establishment or maintenance of neuroblast polarity	0.480475	-0.732979	1	13	1	0.00186567	536	10917	44861	sdt
	GO:0050684	regulation of mRNA processing	0.48493	-0.723751	1	73	4	0.00746269	536	10917	3.46484e+19	aret,Rox8,elav,Rsf1
	GO:0052547	regulation of peptidase activity	0.486265	-0.721001	1	53	3	0.00559701	536	10917	406444412944936	7B2,hbs,Eip93F
	GO:0032271	regulation of protein polymerization	0.486866	-0.719766	1	33	2	0.00373134	536	10917	3107541392	DAAM,Jupiter
	GO:0006816	calcium ion transport	0.486866	-0.719766	1	33	2	0.00373134	536	10917	3215840551	cac,CG1090
	GO:0016321	female meiosis chromosome segregation	0.486866	-0.719766	1	33	2	0.00373134	536	10917	3492733418	Gli,Rab5
	GO:0006026	aminoglycan catabolic process	0.486866	-0.719766	1	33	2	0.00373134	536	10917	390633771920	PGRP-LC,PGRP-LD
	GO:0098660	inorganic ion transmembrane transport	0.492978	-0.707292	1	94	5	0.00932836	536	10917	3.18563e+25	CG31030,Vha100-1,CG1688,cac,VhaM9.7-a
	GO:0051235	maintenance of location	0.495622	-0.701941	1	74	4	0.00746269	536	10917	3.88633e+19	Ank2,CG9121,CG9426,klar
	GO:1903311	regulation of mRNA metabolic process	0.495622	-0.701941	1	74	4	0.00746269	536	10917	3.46484e+19	aret,Rox8,elav,Rsf1
	GO:0007450	dorsal/ventral pattern formation, imaginal disc	0.498812	-0.695526	1	54	3	0.00559701	536	10917	382184004631391	drpr,CG14073,peb
	GO:0007631	feeding behavior	0.502779	-0.687604	1	34	2	0.00373134	536	10917	276885835832	dpr,mtt
	GO:0031400	negative regulation of protein modification process	0.502779	-0.687604	1	34	2	0.00373134	536	10917	3124838961	sgg,Cbl
	GO:0006984	ER-nucleus signaling pathway	0.506013	-0.681192	1	14	1	0.00186567	536	10917	42358	Ire1
	GO:0006446	regulation of translational initiation	0.506013	-0.681192	1	14	1	0.00186567	536	10917	39071	Hsp67Bc
	GO:0031929	TOR signaling	0.506013	-0.681192	1	14	1	0.00186567	536	10917	32760	Socs16D
	GO:0046011	regulation of oskar mRNA translation	0.506013	-0.681192	1	14	1	0.00186567	536	10917	34648	aret
	GO:0008585	female gonad development	0.506013	-0.681192	1	14	1	0.00186567	536	10917	36897	inaC
	GO:0030704	vitelline membrane formation	0.506013	-0.681192	1	14	1	0.00186567	536	10917	43528	Cad99C
	GO:0007056	spindle assembly involved in female meiosis	0.506013	-0.681192	1	14	1	0.00186567	536	10917	32152	wisp
	GO:0009047	dosage compensation by hyperactivation of X chromosome	0.506013	-0.681192	1	14	1	0.00186567	536	10917	38963	Unr
	GO:0006901	vesicle coating	0.506013	-0.681192	1	14	1	0.00186567	536	10917	4379834	stnB
	GO:2000736	regulation of stem cell differentiation	0.506013	-0.681192	1	14	1	0.00186567	536	10917	34648	aret
	GO:0035803	egg coat formation	0.506013	-0.681192	1	14	1	0.00186567	536	10917	43528	Cad99C
	GO:0035149	lumen formation, open tracheal system	0.506013	-0.681192	1	14	1	0.00186567	536	10917	38067	klar
	GO:0016183	synaptic vesicle coating	0.506013	-0.681192	1	14	1	0.00186567	536	10917	4379834	stnB
	GO:0007305	vitelline membrane formation involved in chorion-containing eggshell formation	0.506013	-0.681192	1	14	1	0.00186567	536	10917	43528	Cad99C
	GO:0046545	development of primary female sexual characteristics	0.506013	-0.681192	1	14	1	0.00186567	536	10917	36897	inaC
	GO:0010243	response to organonitrogen compound	0.50622	-0.680784	1	75	4	0.00746269	536	10917	3.28463e+19	Bx,dock,Hsp67Bc,Ace
	GO:0006997	nucleus organization	0.511202	-0.670991	1	55	3	0.00559701	536	10917	321523718838067	wisp,Topors,klar
	GO:1902600	hydrogen ion transmembrane transport	0.511202	-0.670991	1	55	3	0.00559701	536	10917	3185634344238520	CG31030,Vha100-1,VhaM9.7-a
	GO:0015031	protein transport	0.514616	-0.664334	1	301	15	0.0279851	536	10917	4.29604e+77	RabX4,didum,g,Tango5,stnB,Rab14,qtc,p,Rab5,Apc,tamo,Vps35,CG43340,Syx13,ltd
	GO:0048515	spermatid differentiation	0.516221	-0.661221	1	117	6	0.011194	536	10917	3.56803e+29	didum,Gli,gish,blanks,Kap3,aret
	GO:0006402	mRNA catabolic process	0.518369	-0.657067	1	35	2	0.00373134	536	10917	3654442358	AGO1,Ire1
	GO:0042787	protein ubiquitination involved in ubiquitin-dependent protein catabolic process	0.518369	-0.657067	1	35	2	0.00373134	536	10917	3903538961	CG5087,Cbl
	GO:0050776	regulation of immune response	0.524618	-0.645084	1	118	6	0.011194	536	10917	4.48493e+29	pnr,wisp,ird1,PGRP-LC,SP2353,Mmp2
	GO:0051321	meiotic cell cycle	0.526497	-0.641509	1	180	9	0.016791	536	10917	4.22133e+44	cona,wisp,Gli,thoc5,wuc,Topors,sgg,Rab5,Syx13
	GO:0048102	autophagic cell death	0.52711	-0.640346	1	77	4	0.00746269	536	10917	3.82183e+19	drpr,Akap200,comm3,Eip93F
	GO:0035071	salivary gland cell autophagic cell death	0.52711	-0.640346	1	77	4	0.00746269	536	10917	3.82183e+19	drpr,Akap200,comm3,Eip93F
	GO:0044255	cellular lipid metabolic process	0.528478	-0.637753	1	242	12	0.0223881	536	10917	2.76889e+61	CG42271,CG10253,CdsA,Pi4KIIalpha,Ipp,CG3961,CG3812,CG10082,qm,Seipin,dob,PIP5K59B
	GO:0046329	negative regulation of JNK cascade	0.530298	-0.634316	1	15	1	0.00186567	536	10917	31391	peb
	GO:0085029	extracellular matrix assembly	0.530298	-0.634316	1	15	1	0.00186567	536	10917	43528	Cad99C
	GO:0016348	imaginal disc-derived leg joint morphogenesis	0.530298	-0.634316	1	15	1	0.00186567	536	10917	33418	Rab5
	GO:0051607	defense response to virus	0.530298	-0.634316	1	15	1	0.00186567	536	10917	39063	PGRP-LC
	GO:1902749	regulation of cell cycle G2/M phase transition	0.530298	-0.634316	1	15	1	0.00186567	536	10917	39673	Z600
	GO:0070303	negative regulation of stress-activated protein kinase signaling cascade	0.530298	-0.634316	1	15	1	0.00186567	536	10917	31391	peb
	GO:0043277	apoptotic cell clearance	0.530298	-0.634316	1	15	1	0.00186567	536	10917	38218	drpr
	GO:0010389	regulation of G2/M transition of mitotic cell cycle	0.530298	-0.634316	1	15	1	0.00186567	536	10917	39673	Z600
	GO:0042558	pteridine-containing compound metabolic process	0.530298	-0.634316	1	15	1	0.00186567	536	10917	43499	Pcd
	GO:0030720	oocyte localization involved in germarium-derived egg chamber formation	0.530298	-0.634316	1	15	1	0.00186567	536	10917	44642	Apc
	GO:0035025	positive regulation of Rho protein signal transduction	0.530298	-0.634316	1	15	1	0.00186567	536	10917	40205	CG42674
	GO:0042693	muscle cell fate commitment	0.530298	-0.634316	1	15	1	0.00186567	536	10917	36295	jeb
	GO:0032873	negative regulation of stress-activated MAPK cascade	0.530298	-0.634316	1	15	1	0.00186567	536	10917	31391	peb
	GO:0050878	regulation of body fluid levels	0.530298	-0.634316	1	15	1	0.00186567	536	10917	39706	Eig71Ee
	GO:0045456	ecdysteroid biosynthetic process	0.530298	-0.634316	1	15	1	0.00186567	536	10917	33374	Npc2a
	GO:0071902	positive regulation of protein serine/threonine kinase activity	0.530298	-0.634316	1	15	1	0.00186567	536	10917	35425	step
	GO:0006919	activation of cysteine-type endopeptidase activity involved in apoptotic process	0.530298	-0.634316	1	15	1	0.00186567	536	10917	44936	Eip93F
	GO:0045732	positive regulation of protein catabolic process	0.530298	-0.634316	1	15	1	0.00186567	536	10917	31248	sgg
	GO:0031935	regulation of chromatin silencing	0.533631	-0.628051	1	36	2	0.00373134	536	10917	4142338620	l(3)neo38,blanks
	GO:0042078	germ-line stem cell division	0.533631	-0.628051	1	36	2	0.00373134	536	10917	3464843087	aret,msi
	GO:0070482	response to oxygen levels	0.535485	-0.624582	1	57	3	0.00559701	536	10917	326194308744936	para,msi,Eip93F
	GO:0051057	positive regulation of small GTPase mediated signal transduction	0.535485	-0.624582	1	57	3	0.00559701	536	10917	402053745133840	CG42674,MESK2,CG9098
	GO:0046579	positive regulation of Ras protein signal transduction	0.535485	-0.624582	1	57	3	0.00559701	536	10917	402053745133840	CG42674,MESK2,CG9098
	GO:0036293	response to decreased oxygen levels	0.535485	-0.624582	1	57	3	0.00559701	536	10917	326194308744936	para,msi,Eip93F
	GO:0007283	spermatogenesis	0.544076	-0.608667	1	224	11	0.0205224	536	10917	4.01433e+54	wnd,eya,dila,didum,gish,Gli,blanks,Kap3,aret,Rcd7,so
	GO:0006996	organelle organization	0.544339	-0.608182	1	1476	72	0.134328	536	10917	36401,39332,36876,35021,5740544,41861,32551,31248,33418,36445,42358,40143,47091,43633,42896,44543,33608,43690,33239,34702,318874,32850,37201,38863,38067,317817,42213,33845,32724,43442,34927,50225,37810,53563,4379834,34840,33607,44642,40126,38491,42986,43758,32071,36718,43571,35058,39485,35977,32723,44819,36978,45922,37188,34633,48973,36010,35680,32544,40670,31075,42443,33732,40303,32152,326232,36…	wuc,Klp68D,unc-104,CG13284,futsch,Sra-1,CycD,sgg,Rab5,Nrk,Ire1,wnd,comt,tmod,crb,enc,slp2,chp,Pph13,CG5142,Nnf1b,Rip11,ena,Ank2,klar,CG32006,cona,mtm,B-H1,Vha100-1,Gli,Prosap,thoc5,gukh,stnB,Rab14,slp1,Apc,Rcd7,ens,ssh,RhoGAP100F,Kap3,Khc-73,Sry-alpha,qua,Syx13,brp,B-H2,g,Patronin,rap,Topors,Ced-12,Src64B,dila,didum,Gbeta13F,Pi4KIIalpha,DAAM,CG15923,CG9121,CG3618,wisp,Tango5,SP2353,alpha-Spec,Atf…
	GO:0016271	tissue death	0.548358	-0.600826	1	100	5	0.00932836	536	10917	3.82184e+24	drpr,Fhos,Akap200,comm3,Eip93F
	GO:0007559	histolysis	0.548358	-0.600826	1	100	5	0.00932836	536	10917	3.82184e+24	drpr,Fhos,Akap200,comm3,Eip93F
	GO:0003333	amino acid transmembrane transport	0.548558	-0.600462	1	37	2	0.00373134	536	10917	3298642988	CG12531,CG13646
	GO:0048232	male gamete generation	0.550122	-0.597616	1	225	11	0.0205224	536	10917	4.01433e+54	wnd,eya,dila,didum,gish,Gli,blanks,Kap3,aret,Rcd7,so
	GO:0097202	activation of cysteine-type endopeptidase activity	0.553391	-0.59169	1	16	1	0.00186567	536	10917	44936	Eip93F
	GO:0006379	mRNA cleavage	0.553391	-0.59169	1	16	1	0.00186567	536	10917	36544	AGO1
[truncated: 3,980 more rows]

## Sheet: Cluster2B
TermID	Term	Enrichment	logP	FDR_BH	Genes in Term	Target Genes in Term	Fraction of Targets in Term	Total Target Genes	Total Genes	Entrez Gene IDs	Gene Symbols
GO:0019932	second-messenger-mediated signaling	0.000154721	-8.77389	0.43578	20	4	0.025974	154	10917	3.76143e+19	CG42260,amn,Lk,Pka-C1
GO:0016079	synaptic vesicle exocytosis	0.000173824	-8.65747	0.43578	59	6	0.038961	154	10917	4.37834e+29	Syt7,stj,Sytbeta,Syt1,cpx,Rim
GO:0035556	intracellular signal transduction	0.00041165	-7.79534	0.43578	308	13	0.0844156	154	10917	3.21954e+64	Rab40,CG42260,RabX5,amn,Gie,dnd,Rab26,stops,Gycbeta100B,CG5160,Rab3,Pka-C1,Lk
GO:0019935	cyclic-nucleotide-mediated signaling	0.000418012	-7.78	0.43578	11	3	0.0194805	154	10917	376143299934284	CG42260,amn,Pka-C1
GO:0046903	secretion	0.000516094	-7.56922	0.43578	164	9	0.0584416	154	10917	3.65264e+44	stj,Rim,gb,Syt7,Sytbeta,Syt1,Rab3,cpx,Lk
GO:0006887	exocytosis	0.000558547	-7.49017	0.43578	73	6	0.038961	154	10917	4.37834e+29	Syt7,stj,Sytbeta,Syt1,cpx,Rim
GO:0008359	regulation of bicoid mRNA localization	0.000587646	-7.43939	0.43578	3	2	0.012987	154	10917	3734534284	exu,Pka-C1
GO:0050804	regulation of synaptic transmission	0.000600852	-7.41716	0.43578	74	6	0.038961	154	10917	4.26463e+29	Nrx-1,Syt1,cpx,Rdl,Rim,Pka-C1
GO:0070588	calcium ion transmembrane transport	0.000709676	-7.2507	0.43578	13	3	0.0194805	154	10917	345573155043787	Ca-beta,Ca-alpha1T,PMCA
GO:0007274	neuromuscular synaptic transmission	0.000728849	-7.22404	0.43578	51	5	0.0324675	154	10917	3.90524e+24	nwk,Nrx-1,stj,cpx,Rim
GO:0007269	neurotransmitter secretion	0.00091682	-6.9946	0.48188	110	7	0.0454545	154	10917	4.37834e+34	Syt7,stj,Sytbeta,Syt1,cpx,Rab3,Rim
GO:0023061	signal release	0.000967151	-6.94116	0.48188	111	7	0.0454545	154	10917	4.37834e+34	Syt7,stj,Sytbeta,Syt1,cpx,Rab3,Rim
GO:0032482	Rab protein signal transduction	0.00113323	-6.78268	0.5212	33	4	0.025974	154	10917	3.21954e+19	Rab40,RabX5,Rab3,Rab26
GO:0007268	synaptic transmission	0.00130211	-6.64377	0.5248	306	12	0.0779221	154	10917	3.90524e+59	nwk,stj,Rim,Syn2,metro,Syn1,Syt7,Nrx-1,Syt1,Sytbeta,cpx,Rab3
GO:0001505	regulation of neurotransmitter levels	0.00131661	-6.6327	0.5248	117	7	0.0454545	154	10917	4.37834e+34	Syt7,stj,Sytbeta,Syt1,cpx,Rab3,Rim
GO:0032879	regulation of localization	0.00152765	-6.48402	0.56263	270	11	0.0714286	154	10917	3.85744e+54	CG13712,exu,Bili,Teh2,Rim,Rab26,Nrx-1,Syt1,Teh4,cpx,Pka-C1
GO:0007264	small GTPase mediated signal transduction	0.0015997	-6.43794	0.56263	121	7	0.0454545	154	10917	3.21954e+34	Rab40,RabX5,CG5160,Rab3,Gie,dnd,Rab26
GO:0032940	secretion by cell	0.00176661	-6.33869	0.5795	158	8	0.0519481	154	10917	3.65264e+39	stj,Rim,gb,Syt7,Syt1,Sytbeta,Rab3,cpx
GO:0050803	regulation of synapse structure and activity	0.00184152	-6.29716	0.5795	124	7	0.0454545	154	10917	3.68484e+34	Syn2,metro,nwk,Nrx-1,Syn1,stj,Syt1
GO:0044087	regulation of cellular component biogenesis	0.00223588	-6.10312	0.66842	202	9	0.0584416	154	10917	3.90524e+44	nwk,exu,stj,Syn2,metro,Syn1,Syt1,mle,Pka-C1
GO:0050807	regulation of synapse organization	0.00245923	-6.00791	0.70018	97	6	0.038961	154	10917	3.68484e+29	Syn2,metro,nwk,Nrx-1,Syn1,stj
GO:0019933	cAMP-mediated signaling	0.00285733	-5.85787	0.71191	6	2	0.012987	154	10917	3299934284	amn,Pka-C1
GO:0002028	regulation of sodium ion transport	0.00285733	-5.85787	0.71191	6	2	0.012987	154	10917	3850138502	Teh4,Teh2
GO:0006836	neurotransmitter transport	0.00285763	-5.85776	0.71191	134	7	0.0454545	154	10917	4.37833e+34	Syt7,Syt1,stj,Sytbeta,Rab3,cpx,Rim
GO:0060341	regulation of cellular localization	0.00323358	-5.73417	0.77334	137	7	0.0454545	154	10917	3.73454e+34	exu,Nrx-1,Syt1,cpx,Rim,Pka-C1,Rab26
GO:0065007	biological regulation	0.00356641	-5.63619	0.80752	3325	63	0.409091	154	10917	37614,38209,39052,35588,318005,38502,38184,43215,43787,43683,32418,43783,35523,39630,36127,34957,41252,3354941,47767,43362,32999,36526,35266,42150,35253,36848,35504,42297,43682,40424,38198,37230,33473,34015,64877,34371,39620,47746,38574,34718,32195,43019,5740204,38531,39054,40961,42580,326197,34752,31107,38169,42646,37345,32790,31802,40359,33237,36176,38501,38833,41678,43793,34284	CG42260,RabX5,nwk,Epac,sphinx1,Teh2,CG7879,amon,PMCA,stops,CG9514,Syt7,mle,Sytbeta,Rab3,pkaap,CG42795,CG40178,crc,CG34362,amn,stj,bsh,Rim,spi,Syn2,kune,nos,Gycbeta100B,Syn1,Bgb,hts,Syt1,CG5160,cpx,CG18619,Brd,Lk,CG13712,kek4,Rab40,Bili,clos,dyl,Rdl,Gie,dnd,Ndfip,CG9293,Nmdar2,stet,Nrx-1,exu,RhoGAP16F,oc,Rab26,cold,metro,Teh4,sphinx2,ninaB,bip2,Pka-C1
GO:0048489	synaptic vesicle transport	0.00419762	-5.47324	0.80752	108	6	0.038961	154	10917	4.37834e+29	Syt7,stj,Sytbeta,Syt1,cpx,Rim
GO:0097480	establishment of synaptic vesicle localization	0.00419762	-5.47324	0.80752	108	6	0.038961	154	10917	4.37833e+29	Syt7,Syt1,stj,Sytbeta,cpx,Rim
GO:0097479	synaptic vesicle localization	0.00419762	-5.47324	0.80752	108	6	0.038961	154	10917	4.37833e+29	Syt7,Syt1,stj,Sytbeta,cpx,Rim
GO:0007154	cell communication	0.00437192	-5.43255	0.80752	1418	32	0.207792	154	10917	3.76144e+161	CG42260,RabX5,nwk,GLaz,stops,Syt7,Sytbeta,Rab3,amn,stj,Rim,spi,Syn2,Gycbeta100B,Syn1,Syt1,CG5160,cpx,Brd,Lk,Rab40,clos,dnd,Gie,Nmdar2,stet,Nrx-1,exu,Rab26,metro,ninaB,Pka-C1
GO:0051650	establishment of vesicle localization	0.00439155	-5.42807	0.80752	109	6	0.038961	154	10917	4.37833e+29	Syt7,Syt1,stj,Sytbeta,cpx,Rim
GO:0044700	single organism signaling	0.00451456	-5.40045	0.80752	1363	31	0.201299	154	10917	3.21954e+156	Rab40,CG42260,RabX5,nwk,clos,Gie,dnd,stops,stet,Nmdar2,Nrx-1,Syt7,Sytbeta,Rab3,exu,amn,stj,Rim,Rab26,spi,Syn2,metro,Gycbeta100B,Syn1,Syt1,CG5160,cpx,ninaB,Brd,Lk,Pka-C1
GO:0023052	signaling	0.00451456	-5.40045	0.80752	1363	31	0.201299	154	10917	3.76143e+156	CG42260,Rab40,RabX5,nwk,clos,Gie,dnd,stops,stet,Nmdar2,Syt7,Nrx-1,Sytbeta,Rab3,exu,amn,stj,Rim,Rab26,spi,Syn2,metro,Gycbeta100B,Syn1,Syt1,CG5160,ninaB,cpx,Brd,Lk,Pka-C1
GO:0051648	vesicle localization	0.00459201	-5.38344	0.80752	110	6	0.038961	154	10917	4.37833e+29	Syt7,Syt1,stj,Sytbeta,cpx,Rim
GO:0045752	positive regulation of Toll signaling pathway	0.0052356	-5.25227	0.89439	8	2	0.012987	154	10917	31800538833	sphinx1,sphinx2
GO:0008582	regulation of synaptic growth at neuromuscular junction	0.00597356	-5.12041	0.93895	82	5	0.0324675	154	10917	3.68484e+24	Syn2,metro,nwk,Syn1,stj
GO:0048149	behavioral response to ethanol	0.00609689	-5.09998	0.93895	52	4	0.025974	154	10917	3.29994e+19	amn,spi,fu12,Pka-C1
GO:1902875	regulation of embryonic pattern specification	0.00628166	-5.07012	0.93895	27	3	0.0194805	154	10917	373453347334284	exu,Syt1,Pka-C1
GO:0007317	regulation of pole plasm oskar mRNA localization	0.00628166	-5.07012	0.93895	27	3	0.0194805	154	10917	373453347334284	exu,Syt1,Pka-C1
GO:0060281	regulation of oocyte development	0.00628166	-5.07012	0.93895	27	3	0.0194805	154	10917	373453347334284	exu,Syt1,Pka-C1
GO:0007615	anesthesia-resistant memory	0.0066694	-5.01022	0.94944	9	2	0.012987	154	10917	3299934284	amn,Pka-C1
GO:0072375	medium-term memory	0.0066694	-5.01022	0.94944	9	2	0.012987	154	10917	3110732999	Nmdar2,amn
GO:0051963	regulation of synapse assembly	0.00729088	-4.92113	1	86	5	0.0324675	154	10917	3.68484e+24	Syn2,metro,nwk,Syn1,stj
GO:0023051	regulation of signaling	0.00815853	-4.80869	1	688	18	0.116883	154	10917	3.47184e+91	kek4,nwk,Bili,Epac,sphinx1,Rdl,Ndfip,stops,Nrx-1,pkaap,CG42795,RhoGAP16F,Rim,spi,Syt1,sphinx2,cpx,Pka-C1
GO:0017157	regulation of exocytosis	0.00825996	-4.79634	1	10	2	0.012987	154	10917	4215040359	Rim,Rab26
GO:0010646	regulation of cell communication	0.00926861	-4.68112	1	697	18	0.116883	154	10917	3.47184e+91	kek4,nwk,Bili,Epac,sphinx1,Rdl,Ndfip,stops,Nrx-1,pkaap,CG42795,RhoGAP16F,Rim,spi,Syt1,sphinx2,cpx,Pka-C1
GO:0006811	ion transport	0.0104281	-4.56325	1	397	12	0.0779221	154	10917	3.76144e+59	CG42260,nrv3,Ca-alpha1T,Rdl,PMCA,CG12344,gb,Task6,Nmdar2,Ca-beta,tadr,Shaw
GO:0034220	ion transmembrane transport	0.0105416	-4.55243	1	131	6	0.038961	154	10917	4.16713e+29	Task6,Ca-beta,tadr,Ca-alpha1T,PMCA,gb
GO:0006816	calcium ion transport	0.0110183	-4.5082	1	33	3	0.0194805	154	10917	345573155043787	Ca-beta,Ca-alpha1T,PMCA
GO:0051049	regulation of transport	0.0112673	-4.48585	1	173	7	0.0454545	154	10917	4.26463e+34	Nrx-1,Syt1,Teh4,Teh2,cpx,Rim,Rab26
GO:0045471	response to ethanol	0.0112756	-4.48511	1	62	4	0.025974	154	10917	3.29993e+19	amn,Pka-C1,spi,fu12
GO:0065008	regulation of biological quality	0.0116205	-4.45499	1	934	22	0.142857	154	10917	3.21954e+111	Rab40,nwk,dyl,amon,PMCA,CG9514,Syt7,Nrx-1,Sytbeta,Rab3,CG40178,stj,Rim,Syn2,cold,kune,metro,Syn1,Syt1,hts,cpx,Lk
GO:0050877	neurological system process	0.013173	-4.32959	1	511	14	0.0909091	154	10917	4.01573e+71	Ir76a,amn,stj,nrv3,dpr8,dpr10,spi,dpr11,stops,Nmdar2,Nrx-1,dpr7,Or43b,Pka-C1
GO:0006776	vitamin A metabolic process	0.0141064	-4.26112	1	1	1	0.00649351	154	10917	41678	ninaB
GO:0030724	testicular fusome organization	0.0141064	-4.26112	1	1	1	0.00649351	154	10917	37230	hts
GO:0006868	glutamine transport	0.0141064	-4.26112	1	1	1	0.00649351	154	10917	43265	gb
GO:0045872	positive regulation of rhodopsin gene expression	0.0141064	-4.26112	1	1	1	0.00649351	154	10917	31802	oc
GO:0048816	ocellus morphogenesis	0.0141064	-4.26112	1	1	1	0.00649351	154	10917	31802	oc
GO:0016102	diterpenoid biosynthetic process	0.0141064	-4.26112	1	1	1	0.00649351	154	10917	41678	ninaB
GO:0035238	vitamin A biosynthetic process	0.0141064	-4.26112	1	1	1	0.00649351	154	10917	41678	ninaB
GO:0035633	maintenance of blood-brain barrier	0.0141064	-4.26112	1	1	1	0.00649351	154	10917	33237	cold
GO:0046682	response to cyclodiene	0.0141064	-4.26112	1	1	1	0.00649351	154	10917	39054	Rdl
GO:0045871	negative regulation of rhodopsin gene expression	0.0141064	-4.26112	1	1	1	0.00649351	154	10917	31802	oc
GO:0016119	carotene metabolic process	0.0141064	-4.26112	1	1	1	0.00649351	154	10917	41678	ninaB
GO:0006775	fat-soluble vitamin metabolic process	0.0141064	-4.26112	1	1	1	0.00649351	154	10917	41678	ninaB
GO:0071938	vitamin A transport	0.0141064	-4.26112	1	1	1	0.00649351	154	10917	42646	Nrx-1
GO:0014047	glutamate secretion	0.0141064	-4.26112	1	1	1	0.00649351	154	10917	43265	gb
GO:0042362	fat-soluble vitamin biosynthetic process	0.0141064	-4.26112	1	1	1	0.00649351	154	10917	41678	ninaB
GO:0048791	calcium ion-dependent exocytosis of neurotransmitter	0.0141064	-4.26112	1	1	1	0.00649351	154	10917	33473	Syt1
GO:0042214	terpene metabolic process	0.0141064	-4.26112	1	1	1	0.00649351	154	10917	41678	ninaB
GO:0046717	acid secretion	0.0141064	-4.26112	1	1	1	0.00649351	154	10917	43265	gb
GO:0070838	divalent metal ion transport	0.0150631	-4.19551	1	37	3	0.0194805	154	10917	345573155043787	Ca-beta,Ca-alpha1T,PMCA
GO:0072511	divalent inorganic cation transport	0.0150631	-4.19551	1	37	3	0.0194805	154	10917	345573155043787	Ca-beta,Ca-alpha1T,PMCA
GO:0006813	potassium ion transport	0.0150631	-4.19551	1	37	3	0.0194805	154	10917	416713540833599	Task6,nrv3,Shaw
GO:0008306	associative learning	0.0162053	-4.12242	1	69	4	0.025974	154	10917	3.29994e+19	amn,Nrx-1,spi,Pka-C1
GO:0060627	regulation of vesicle-mediated transport	0.0162053	-4.12242	1	69	4	0.025974	154	10917	4.26463e+19	Nrx-1,Syt1,Rim,Rab26
GO:0050794	regulation of cellular process	0.0171614	-4.06509	1	2824	52	0.337662	154	10917	37614,38209,39052,35588,318005,38184,43683,35523,36127,34957,41252,3354941,47767,43362,32999,36526,35266,42150,35253,36848,42297,43682,40424,38198,33473,34015,64877,34371,39620,47746,34718,32195,43019,5740204,38531,39054,40961,326197,34752,42580,31107,38169,42646,37345,32790,31802,40359,36176,38833,41678,43793,34284	CG42260,RabX5,nwk,Epac,sphinx1,CG7879,stops,mle,Rab3,pkaap,CG42795,CG40178,crc,CG34362,amn,stj,bsh,Rim,spi,Syn2,nos,Gycbeta100B,Syn1,Bgb,Syt1,CG5160,cpx,CG18619,Brd,Lk,kek4,Rab40,Bili,clos,dyl,Rdl,Gie,Ndfip,CG9293,dnd,Nmdar2,stet,Nrx-1,exu,RhoGAP16F,oc,Rab26,metro,sphinx2,ninaB,bip2,Pka-C1
GO:0045995	regulation of embryonic development	0.0186734	-3.98065	1	72	4	0.025974	154	10917	3.73453e+19	exu,Syt1,dyl,Pka-C1
GO:0030001	metal ion transport	0.0194332	-3.94077	1	150	6	0.038961	154	10917	3.45574e+29	Ca-beta,Task6,nrv3,Ca-alpha1T,Shaw,PMCA
GO:0008592	regulation of Toll signaling pathway	0.0208415	-3.87081	1	16	2	0.012987	154	10917	31800538833	sphinx1,sphinx2
GO:0010959	regulation of metal ion transport	0.0208415	-3.87081	1	16	2	0.012987	154	10917	3850138502	Teh4,Teh2
GO:0050789	regulation of biological process	0.0211184	-3.85761	1	3053	55	0.357143	154	10917	37614,38209,39052,35588,318005,38502,38184,43683,35523,36127,34957,41252,3354941,47767,43362,32999,36526,35266,42150,35253,36848,42297,43682,40424,38198,33473,34015,64877,34371,39620,47746,38574,34718,32195,43019,5740204,38531,39054,40961,326197,34752,42580,31107,38169,42646,37345,32790,31802,40359,36176,38501,38833,41678,43793,34284	CG42260,RabX5,nwk,Epac,sphinx1,Teh2,CG7879,stops,mle,Rab3,pkaap,CG42795,CG40178,crc,CG34362,amn,stj,bsh,Rim,spi,Syn2,nos,Gycbeta100B,Syn1,Bgb,Syt1,CG5160,cpx,CG18619,Brd,Lk,CG13712,kek4,Rab40,Bili,clos,dyl,Rdl,Gie,Ndfip,CG9293,dnd,Nmdar2,stet,Nrx-1,exu,RhoGAP16F,oc,Rab26,metro,Teh4,sphinx2,ninaB,bip2,Pka-C1
GO:0050830	defense response to Gram-positive bacterium	0.0211507	-3.85608	1	42	3	0.0194805	154	10917	3504931800538830	CG6639,sphinx1,sphinx2
GO:1900073	regulation of neuromuscular synaptic transmission	0.0234045	-3.75483	1	17	2	0.012987	154	10917	4264633473	Nrx-1,Syt1
GO:0051046	regulation of secretion	0.0239101	-3.73345	1	44	3	0.0194805	154	10917	648774215040359	cpx,Rim,Rab26
GO:0007265	Ras protein signal transduction	0.0242783	-3.71817	1	78	4	0.025974	154	10917	3.21954e+19	Rab40,RabX5,Rab3,Rab26
GO:0007612	learning	0.025301	-3.67691	1	79	4	0.025974	154	10917	3.29994e+19	amn,Nrx-1,spi,Pka-C1
GO:0052652	cyclic purine nucleotide metabolic process	0.0260897	-3.64622	1	18	2	0.012987	154	10917	4368232999	Gycbeta100B,amn
GO:0003008	system process	0.0263792	-3.63518	1	559	14	0.0909091	154	10917	4.01573e+71	Ir76a,amn,stj,nrv3,dpr8,dpr10,spi,dpr11,stops,Nmdar2,Nrx-1,dpr7,Or43b,Pka-C1
GO:2000026	regulation of multicellular organismal development	0.0277802	-3.58343	1	404	11	0.0714286	154	10917	3.90524e+54	nwk,exu,stj,dyl,oc,spi,Syn2,metro,Syn1,Syt1,Pka-C1
GO:0007190	activation of adenylate cyclase activity	0.0280152	-3.57501	1	2	1	0.00649351	154	10917	32999	amn
GO:0035180	larval wandering behavior	0.0280152	-3.57501	1	2	1	0.00649351	154	10917	43215	amon
GO:0046865	terpenoid transport	0.0280152	-3.57501	1	2	1	0.00649351	154	10917	42646	Nrx-1
GO:0045315	positive regulation of compound eye photoreceptor development	0.0280152	-3.57501	1	2	1	0.00649351	154	10917	31802	oc
GO:0045470	R8 cell-mediated photoreceptor organization	0.0280152	-3.57501	1	2	1	0.00649351	154	10917	35253	spi
GO:0042479	positive regulation of eye photoreceptor cell development	0.0280152	-3.57501	1	2	1	0.00649351	154	10917	31802	oc
GO:0016486	peptide hormone processing	0.0280152	-3.57501	1	2	1	0.00649351	154	10917	43215	amon
GO:0006438	valyl-tRNA aminoacylation	0.0280152	-3.57501	1	2	1	0.00649351	154	10917	39023	CG5660
GO:0042574	retinal metabolic process	0.0280152	-3.57501	1	2	1	0.00649351	154	10917	41678	ninaB
GO:0015734	taurine transport	0.0280152	-3.57501	1	2	1	0.00649351	154	10917	43265	gb
GO:0046864	isoprenoid transport	0.0280152	-3.57501	1	2	1	0.00649351	154	10917	42646	Nrx-1
GO:0042705	ocellus photoreceptor cell differentiation	0.0280152	-3.57501	1	2	1	0.00649351	154	10917	31802	oc
GO:0045161	neuronal ion channel clustering	0.0280152	-3.57501	1	2	1	0.00649351	154	10917	42150	Rim
GO:0070073	clustering of voltage-gated calcium channels	0.0280152	-3.57501	1	2	1	0.00649351	154	10917	42150	Rim
GO:1900244	positive regulation of synaptic vesicle endocytosis	0.0280152	-3.57501	1	2	1	0.00649351	154	10917	42646	Nrx-1
GO:0001881	receptor recycling	0.0280152	-3.57501	1	2	1	0.00649351	154	10917	39052	nwk
GO:0042463	ocellus photoreceptor cell development	0.0280152	-3.57501	1	2	1	0.00649351	154	10917	31802	oc
GO:0060024	rhythmic synaptic transmission	0.0280152	-3.57501	1	2	1	0.00649351	154	10917	33473	Syt1
GO:0051239	regulation of multicellular organismal process	0.0281792	-3.56917	1	564	14	0.0909091	154	10917	3.90524e+69	nwk,exu,amn,stj,dyl,oc,Rdl,spi,Syn2,metro,Bgb,Syn1,Syt1,Pka-C1
GO:0060856	establishment of blood-brain barrier	0.0288932	-3.54415	1	19	2	0.012987	154	10917	3323735504	cold,kune
GO:0040040	thermosensory behavior	0.0288932	-3.54415	1	19	2	0.012987	154	10917	3299934284	amn,Pka-C1
GO:0007600	sensory perception	0.0297247	-3.51578	1	357	10	0.0649351	154	10917	4.01574e+51	Ir76a,stj,nrv3,dpr8,dpr10,dpr11,stops,Nmdar2,dpr7,Or43b
GO:0008595	anterior/posterior axis specification, embryo	0.033768	-3.38824	1	127	5	0.0324675	154	10917	4.22974e+26	nos,exu,clos,oc,Pka-C1
GO:0007351	tripartite regional subdivision	0.033768	-3.38824	1	127	5	0.0324675	154	10917	4.22974e+26	nos,exu,clos,oc,Pka-C1
GO:0048638	regulation of developmental growth	0.033768	-3.38824	1	127	5	0.0324675	154	10917	3.68484e+24	Syn2,metro,nwk,Syn1,stj
GO:0006812	cation transport	0.0340532	-3.37983	1	265	8	0.0519481	154	10917	3.76143e+39	CG42260,Ca-beta,Task6,nrv3,Ca-alpha1T,Shaw,PMCA,gb
GO:0006874	cellular calcium ion homeostasis	0.03484	-3.35699	1	21	2	0.012987	154	10917	4774643787	Lk,PMCA
GO:0050793	regulation of developmental process	0.0349823	-3.35291	1	581	14	0.0909091	154	10917	3.21954e+69	Rab40,nwk,exu,stj,dyl,oc,spi,Syn2,metro,nos,Bgb,Syn1,Syt1,Pka-C1
GO:0051960	regulation of nervous system development	0.0370012	-3.2968	1	221	7	0.0454545	154	10917	3.68484e+34	Syn2,metro,nwk,Syn1,stj,oc,spi
GO:0055074	calcium ion homeostasis	0.0379758	-3.27081	1	22	2	0.012987	154	10917	4774643787	Lk,PMCA
GO:0098662	inorganic cation transmembrane transport	0.0382642	-3.26324	1	90	4	0.025974	154	10917	4.16713e+19	Task6,Ca-beta,Ca-alpha1T,PMCA
GO:0098655	cation transmembrane transport	0.0382642	-3.26324	1	90	4	0.025974	154	10917	4.16713e+19	Task6,Ca-beta,Ca-alpha1T,PMCA
GO:0007267	cell-cell signaling	0.038645	-3.25334	1	534	13	0.0844156	154	10917	3.90524e+64	nwk,exu,stj,Rim,Syn2,metro,Syn1,Syt7,Nrx-1,Syt1,Sytbeta,cpx,Rab3
GO:0000578	embryonic axis specification	0.0388858	-3.24713	1	132	5	0.0324675	154	10917	4.22974e+26	nos,exu,clos,oc,Pka-C1
GO:0009948	anterior/posterior axis specification	0.0410586	-3.19276	1	134	5	0.0324675	154	10917	4.22974e+26	nos,exu,clos,oc,Pka-C1
GO:0043269	regulation of ion transport	0.0412151	-3.18895	1	23	2	0.012987	154	10917	3850138502	Teh4,Teh2
GO:0072503	cellular divalent inorganic cation homeostasis	0.0412151	-3.18895	1	23	2	0.012987	154	10917	4774643787	Lk,PMCA
GO:0007610	behavior	0.0416611	-3.17819	1	540	13	0.0844156	154	10917	3.29993e+64	amn,oc,Rdl,amon,spi,gb,Nmdar2,Nrx-1,mle,hts,Syt1,fu12,Pka-C1
GO:0035187	hatching behavior	0.0417289	-3.17656	1	3	1	0.00649351	154	10917	43215	amon
GO:1902805	positive regulation of synaptic vesicle transport	0.0417289	-3.17656	1	3	1	0.00649351	154	10917	42646	Nrx-1
GO:0016101	diterpenoid metabolic process	0.0417289	-3.17656	1	3	1	0.00649351	154	10917	41678	ninaB
GO:0007421	stomatogastric nervous system development	0.0417289	-3.17656	1	3	1	0.00649351	154	10917	35253	spi
GO:0048266	behavioral response to pain	0.0417289	-3.17656	1	3	1	0.00649351	154	10917	32999	amn
GO:0061541	rhabdomere morphogenesis	0.0417289	-3.17656	1	3	1	0.00649351	154	10917	31802	oc
GO:0007468	regulation of rhodopsin gene expression	0.0417289	-3.17656	1	3	1	0.00649351	154	10917	31802	oc
GO:0007355	anterior region determination	0.0417289	-3.17656	1	3	1	0.00649351	154	10917	31802	oc
GO:0001523	retinoid metabolic process	0.0417289	-3.17656	1	3	1	0.00649351	154	10917	41678	ninaB
GO:0033555	multicellular organismal response to stress	0.0417289	-3.17656	1	3	1	0.00649351	154	10917	32999	amn
GO:0048265	response to pain	0.0417289	-3.17656	1	3	1	0.00649351	154	10917	32999	amn
GO:0051656	establishment of organelle localization	0.0430331	-3.14578	1	181	6	0.038961	154	10917	4.37833e+29	Syt7,Syt1,stj,Sytbeta,cpx,Rim
GO:0098660	inorganic ion transmembrane transport	0.0437665	-3.12889	1	94	4	0.025974	154	10917	4.16713e+19	Task6,Ca-beta,Ca-alpha1T,PMCA
GO:0097305	response to alcohol	0.0437665	-3.12889	1	94	4	0.025974	154	10917	3.29993e+19	amn,Pka-C1,spi,fu12
GO:0008355	olfactory learning	0.0504444	-2.98688	1	59	3	0.0194805	154	10917	329993525334284	amn,spi,Pka-C1
GO:0048134	germ-line cyst formation	0.0515193	-2.9658	1	26	2	0.012987	154	10917	4229737230	nos,hts
GO:0042749	regulation of circadian sleep/wake cycle	0.0515193	-2.9658	1	26	2	0.012987	154	10917	3905434284	Rdl,Pka-C1
GO:0007611	learning or memory	0.0517361	-2.9616	1	143	5	0.0324675	154	10917	3.11073e+24	Nmdar2,amn,Nrx-1,spi,Pka-C1
GO:0050890	cognition	0.0517361	-2.9616	1	143	5	0.0324675	154	10917	3.11073e+24	Nmdar2,amn,Nrx-1,spi,Pka-C1
GO:2000241	regulation of reproductive process	0.0525693	-2.94562	1	60	3	0.0194805	154	10917	373453347334284	exu,Syt1,Pka-C1
GO:0044708	single-organism behavior	0.0529045	-2.93927	1	395	10	0.0649351	154	10917	3.29993e+49	amn,oc,amon,spi,gb,Nmdar2,Nrx-1,Syt1,fu12,Pka-C1
GO:0009247	glycolipid biosynthetic process	0.0551383	-2.89791	1	27	2	0.012987	154	10917	4013939262	CG9376,GlcAT-P
GO:0009612	response to mechanical stimulus	0.0551383	-2.89791	1	27	2	0.012987	154	10917	3540839054	nrv3,Rdl
GO:0031644	regulation of neurological system process	0.0552504	-2.89588	1	4	1	0.00649351	154	10917	39054	Rdl
GO:0030721	spectrosome organization	0.0552504	-2.89588	1	4	1	0.00649351	154	10917	37230	hts
GO:0035284	brain segmentation	0.0552504	-2.89588	1	4	1	0.00649351	154	10917	31802	oc
GO:0019233	sensory perception of pain	0.0552504	-2.89588	1	4	1	0.00649351	154	10917	36526	stj
GO:0006688	glycosphingolipid biosynthetic process	0.0552504	-2.89588	1	4	1	0.00649351	154	10917	39262	GlcAT-P
GO:0035188	hatching	0.0552504	-2.89588	1	4	1	0.00649351	154	10917	43215	amon
GO:0016114	terpenoid biosynthetic process	0.0552504	-2.89588	1	4	1	0.00649351	154	10917	41678	ninaB
GO:0035283	central nervous system segmentation	0.0552504	-2.89588	1	4	1	0.00649351	154	10917	31802	oc
GO:0008056	ocellus development	0.0552504	-2.89588	1	4	1	0.00649351	154	10917	31802	oc
GO:0008302	female germline ring canal formation, actin assembly	0.0552504	-2.89588	1	4	1	0.00649351	154	10917	37230	hts
GO:0090328	regulation of olfactory learning	0.0552504	-2.89588	1	4	1	0.00649351	154	10917	39054	Rdl
GO:0006094	gluconeogenesis	0.0552504	-2.89588	1	4	1	0.00649351	154	10917	37130	CG10924
GO:0035235	ionotropic glutamate receptor signaling pathway	0.0552504	-2.89588	1	4	1	0.00649351	154	10917	31107	Nmdar2
GO:0031340	positive regulation of vesicle fusion	0.0552504	-2.89588	1	4	1	0.00649351	154	10917	33473	Syt1
GO:0030534	adult behavior	0.0556246	-2.88913	1	146	5	0.0324675	154	10917	3.29993e+24	amn,oc,spi,fu12,Pka-C1
GO:0008345	larval locomotory behavior	0.058844	-2.83286	1	28	2	0.012987	154	10917	3347343215	Syt1,amon
GO:0009190	cyclic nucleotide biosynthetic process	0.058844	-2.83286	1	28	2	0.012987	154	10917	4368232999	Gycbeta100B,amn
GO:0022410	circadian sleep/wake cycle process	0.058844	-2.83286	1	28	2	0.012987	154	10917	3905434284	Rdl,Pka-C1
GO:0072507	divalent inorganic cation homeostasis	0.058844	-2.83286	1	28	2	0.012987	154	10917	4774643787	Lk,PMCA
GO:0008049	male courtship behavior	0.0591986	-2.82686	1	63	3	0.0194805	154	10917	329993552343265	amn,mle,gb
GO:0006810	transport	0.0623459	-2.77506	1	1543	29	0.188312	154	10917	3.76143e+144	CG42260,Rab40,RabX5,Rdl,PMCA,CG12344,Ca-beta,Task6,Nmdar2,tadr,Syt7,Nrx-1,Sytbeta,Rab3,Shaw,CG3529,exu,stj,nrv3,MED26,Ca-alpha1T,Rim,Rab26,gb,hts,Syt1,Sln,cpx,Lk
GO:0042745	circadian sleep/wake cycle	0.0626334	-2.77046	1	29	2	0.012987	154	10917	3905434284	Rdl,Pka-C1
GO:0016192	vesicle-mediated transport	0.0660123	-2.71791	1	523	12	0.0779221	154	10917	3.21954e+59	Rab40,RabX5,stj,MED26,Rim,gb,Rab26,Syt7,Sytbeta,Syt1,Rab3,cpx
GO:0019991	septate junction assembly	0.0665033	-2.7105	1	30	2	0.012987	154	10917	3323735504	cold,kune
GO:0007228	positive regulation of hh target transcription factor activity	0.0685824	-2.67972	1	5	1	0.00649351	154	10917	34284	Pka-C1
GO:2000252	negative regulation of feeding behavior	0.0685824	-2.67972	1	5	1	0.00649351	154	10917	47746	Lk
GO:0051180	vitamin transport	0.0685824	-2.67972	1	5	1	0.00649351	154	10917	42646	Nrx-1
GO:0007589	body fluid secretion	0.0685824	-2.67972	1	5	1	0.00649351	154	10917	47746	Lk
GO:0010996	response to auditory stimulus	0.0685824	-2.67972	1	5	1	0.00649351	154	10917	35408	nrv3
GO:0007227	signal transduction downstream of smoothened	0.0685824	-2.67972	1	5	1	0.00649351	154	10917	34284	Pka-C1
GO:1900242	regulation of synaptic vesicle endocytosis	0.0685824	-2.67972	1	5	1	0.00649351	154	10917	42646	Nrx-1
GO:0035074	pupation	0.0685824	-2.67972	1	5	1	0.00649351	154	10917	47767	crc
GO:0007604	phototransduction, UV	0.0685824	-2.67972	1	5	1	0.00649351	154	10917	41678	ninaB
GO:0045799	positive regulation of chromatin assembly or disassembly	0.0685824	-2.67972	1	5	1	0.00649351	154	10917	35523	mle
GO:0016457	dosage compensation complex assembly involved in dosage compensation by hyperactivation of X chromosome	0.0685824	-2.67972	1	5	1	0.00649351	154	10917	35523	mle
GO:0031453	positive regulation of heterochromatin assembly	0.0685824	-2.67972	1	5	1	0.00649351	154	10917	35523	mle
GO:0046364	monosaccharide biosynthetic process	0.0685824	-2.67972	1	5	1	0.00649351	154	10917	37130	CG10924
GO:0019319	hexose biosynthetic process	0.0685824	-2.67972	1	5	1	0.00649351	154	10917	37130	CG10924
GO:0051640	organelle localization	0.0688506	-2.67582	1	204	6	0.038961	154	10917	4.37833e+29	Syt7,Syt1,stj,Sytbeta,cpx,Rim
GO:0007165	signal transduction	0.0688685	-2.67556	1	938	19	0.123377	154	10917	3.21954e+96	Rab40,CG42260,RabX5,clos,Gie,dnd,stops,stet,Nmdar2,Rab3,amn,Rab26,spi,Gycbeta100B,CG5160,ninaB,Brd,Pka-C1,Lk
GO:0050808	synapse organization	0.0737055	-2.60768	1	112	4	0.025974	154	10917	4.26464e+19	Nrx-1,stj,cpx,Rab3
GO:0046467	membrane lipid biosynthetic process	0.0744728	-2.59732	1	32	2	0.012987	154	10917	4013939262	CG9376,GlcAT-P
GO:0010720	positive regulation of cell development	0.0744728	-2.59732	1	32	2	0.012987	154	10917	3180235253	oc,spi
GO:0060179	male mating behavior	0.0760973	-2.57574	1	70	3	0.0194805	154	10917	329993552343265	amn,mle,gb
GO:0007635	chemosensory behavior	0.0775427	-2.55693	1	114	4	0.025974	154	10917	3.29993e+19	amn,Pka-C1,spi,gb
GO:0051124	synaptic growth at neuromuscular junction	0.0785667	-2.54381	1	33	2	0.012987	154	10917	4264664877	Nrx-1,cpx
GO:0050954	sensory perception of mechanical stimulus	0.078668	-2.54252	1	71	3	0.0194805	154	10917	436833110735408	stops,Nmdar2,nrv3
GO:0007314	oocyte anterior/posterior axis specification	0.0812765	-2.5099	1	72	3	0.0194805	154	10917	422973734534284	nos,exu,Pka-C1
GO:0050795	regulation of behavior	0.0812765	-2.5099	1	72	3	0.0194805	154	10917	390544774634284	Rdl,Lk,Pka-C1
GO:0042714	dosage compensation complex assembly	0.0817274	-2.50437	1	6	1	0.00649351	154	10917	35523	mle
GO:0009589	detection of UV	0.0817274	-2.50437	1	6	1	0.00649351	154	10917	41678	ninaB
GO:0042066	perineurial glial growth	0.0817274	-2.50437	1	6	1	0.00649351	154	10917	32999	amn
GO:0032487	regulation of Rap protein signal transduction	0.0817274	-2.50437	1	6	1	0.00649351	154	10917	35588	Epac
GO:0048790	maintenance of presynaptic active zone structure	0.0817274	-2.50437	1	6	1	0.00649351	154	10917	36127	Rab3
GO:0015813	L-glutamate transport	0.0817274	-2.50437	1	6	1	0.00649351	154	10917	43265	gb
GO:0048521	negative regulation of behavior	0.0817274	-2.50437	1	6	1	0.00649351	154	10917	47746	Lk
GO:0031629	synaptic vesicle fusion to presynaptic membrane	0.0817274	-2.50437	1	6	1	0.00649351	154	10917	36526	stj
GO:0008277	regulation of G-protein coupled receptor protein signaling pathway	0.0827295	-2.49218	1	34	2	0.012987	154	10917	4368334957	stops,pkaap
GO:0007354	zygotic determination of anterior/posterior axis, embryo	0.0827295	-2.49218	1	34	2	0.012987	154	10917	574020431802	clos,oc
GO:0006664	glycolipid metabolic process	0.0827295	-2.49218	1	34	2	0.012987	154	10917	4013939262	CG9376,GlcAT-P
GO:0009187	cyclic nucleotide metabolic process	0.0827295	-2.49218	1	34	2	0.012987	154	10917	4368232999	Gycbeta100B,amn
GO:0007528	neuromuscular junction development	0.0839221	-2.47787	1	73	3	0.0194805	154	10917	426463652664877	Nrx-1,stj,cpx
GO:0007300	ovarian nurse cell to oocyte transport	0.0869585	-2.44232	1	35	2	0.012987	154	10917	3734537230	exu,hts
GO:0007173	epidermal growth factor receptor signaling pathway	0.0869585	-2.44232	1	35	2	0.012987	154	10917	3816935253	stet,spi
GO:0038127	ERBB signaling pathway	0.0869585	-2.44232	1	35	2	0.012987	154	10917	3816935253	stet,spi
GO:0009952	anterior/posterior pattern specification	0.0908697	-2.39833	1	169	5	0.0324675	154	10917	4.22974e+26	nos,exu,clos,oc,Pka-C1
GO:0044057	regulation of system process	0.0912512	-2.39414	1	36	2	0.012987	154	10917	3299939054	amn,Rdl
GO:0051234	establishment of localization	0.0914521	-2.39194	1	1603	29	0.188312	154	10917	3.76143e+144	CG42260,Rab40,RabX5,Rdl,PMCA,CG12344,Ca-beta,Task6,Nmdar2,tadr,Syt7,Nrx-1,Sytbeta,Rab3,Shaw,CG3529,exu,stj,nrv3,MED26,Ca-alpha1T,Rim,Rab26,gb,hts,Syt1,Sln,cpx,Lk
GO:0008358	maternal determination of anterior/posterior axis, embryo	0.0920768	-2.38513	1	76	3	0.0194805	154	10917	422973734534284	nos,exu,Pka-C1
GO:0007215	glutamate receptor signaling pathway	0.0946881	-2.35717	1	7	1	0.00649351	154	10917	31107	Nmdar2
GO:0042065	glial cell growth	0.0946881	-2.35717	1	7	1	0.00649351	154	10917	32999	amn
GO:0005991	trehalose metabolic process	0.0946881	-2.35717	1	7	1	0.00649351	154	10917	47767	crc
GO:0009110	vitamin biosynthetic process	0.0946881	-2.35717	1	7	1	0.00649351	154	10917	41678	ninaB
GO:0015800	acidic amino acid transport	0.0946881	-2.35717	1	7	1	0.00649351	154	10917	43265	gb
GO:0005984	disaccharide metabolic process	0.0946881	-2.35717	1	7	1	0.00649351	154	10917	47767	crc
[truncated: 5,753 more rows]

## Sheet: Core Cluster2
TermID	Term	Enrichment	logP	Genes in Term	Target Genes in Term	Fraction of Targets in Term	Total Target Genes	Total Genes	Entrez Gene IDs	Gene Symbols
[truncated: 5,979 more rows]

[truncated: 2 more sheets: Core Cluster7, Core Cluster9]
